# Supplementary material
Source: PubMed Central journal article supplement (PMC6103296)
Supplement: NIHMS985449-supplement-Acyclic_SI_6_revisions.pdf [file NIHMS985449-supplement-Acyclic_SI_6_revisions.pdf]

*Supporting Information for*  
*Catalytic Enantioselective Synthesis of Acyclic Quaternary Centers: Palladium-*  
*Catalyzed Decarboxylative Allylic Alkylation of Fully Substituted Acyclic Enol*  
*Carbonates.*

Eric J. Alexy,<sup>a</sup> Haiming Zhang,<sup>\*,b</sup> and Brian M. Stoltz<sup>\*,a</sup>

<sup>a</sup>*Warren and Katharine Schlinger Laboratory of Chemistry and Chemical Engineering, Division  
of Chemistry and Chemical Engineering, California Institute of Technology, Pasadena,  
California 91125, United States*

<sup>b</sup>*Small Molecule Process Chemistry, Genentech, Inc., 1 DNA Way, South San Francisco,  
California 94080, United States*

zhang.haiming@gene.com

stoltz@caltech.edu

Table of Contents:

|                                                                            |       |
|----------------------------------------------------------------------------|-------|
| Materials and Methods .....                                                | SI 2  |
| List of Abbreviations .....                                                | SI 3  |
| General Procedure for Pd-Catalyzed Allylic Alkylation Reactions .....      | SI 3  |
| General Procedure for Preparation of Allyl Enol Carbonate Substrates ..... | SI 22 |
| Derivatization of Alkylation Products .....                                | SI 33 |
| Preliminary Investigation of Fully Alkyl Quaternary Stereocenters .....    | SI 40 |
| Enantioselectivity time course measurement .....                           | SI 43 |
| References .....                                                           | SI 44 |
| NMR and IR Spectra of New Compounds .....                                  | SI 45 |

## Materials and Methods

Unless otherwise stated, reactions were performed in flame-dried glassware under an argon or nitrogen atmosphere using dry, deoxygenated solvents. Solvents were dried by passage through an activated alumina column under argon.<sup>1</sup> Reaction progress was monitored by thin-layer chromatography (TLC) or Agilent 1290 UHPLC-MS. TLC was performed using E. Merck silica gel 60 F254 precoated glass plates (0.25 mm) and visualized by UV fluorescence quenching, *p*-anisaldehyde, or KMnO<sub>4</sub> staining. Silicycle SiliaFlash® P60 Academic Silica gel (particle size 40–63 nm) was used for flash chromatography. <sup>1</sup>H NMR spectra were recorded on Varian Inova 500 MHz and Bruker 400 MHz spectrometers and are reported relative to residual CHCl<sub>3</sub> (δ 7.26 ppm). <sup>13</sup>C NMR spectra were recorded on a Varian Inova 500 MHz spectrometer (125 MHz) and Bruker 400 MHz spectrometers (100 MHz) and are reported relative to CHCl<sub>3</sub> (δ 77.16 ppm). Data for <sup>1</sup>H NMR are reported as follows: chemical shift (δ ppm) (multiplicity, coupling constant (Hz), integration). Multiplicities are reported as follows: s = singlet, d = doublet, t = triplet, q = quartet, p = pentet, sept = septuplet, m = multiplet, br s = broad singlet, br d = broad doublet. Data for <sup>13</sup>C NMR are reported in terms of chemical shifts (δ ppm). IR spectra were obtained by use of a Perkin Elmer Spectrum BXII spectrometer or Nicolet 6700 FTIR spectrometer using thin films deposited on NaCl plates and reported in frequency of absorption (cm<sup>-1</sup>). Optical rotations were measured with a Jasco P-2000 polarimeter operating on the sodium D-line (589 nm), using a 100 mm path-length cell. Analytical SFC was performed with a Mettler SFC supercritical CO<sub>2</sub> analytical chromatography system utilizing Chiralpak (AD-H, AS-H or IC) or Chiralcel (OD-H, OJ-H, or OB-H) columns (4.6 mm x 25 cm) obtained from Daicel Chemical Industries, Ltd. High resolution mass spectra (HRMS) were obtained from Agilent 6200 Series TOF with an Agilent G1978A Multimode source in electrospray ionization (ESI+), atmospheric pressure chemical ionization (APCI+), or mixed ionization mode (MM: ESI-APCI+). Absolute configuration of **2b** was determined by comparison of the optical rotation to literature reported value,<sup>2</sup> and all other products are assigned by analogy.

Reagents were purchased from Sigma-Aldrich, Acros Organics, Strem, or Alfa Aesar and used as received unless otherwise stated. Ligands **L1**,<sup>3</sup> **L2**,<sup>4</sup> and **L4**<sup>5</sup> and trisubstituted ketones<sup>6</sup> were prepared by known methods.

**List of Abbreviations:**

ee – enantiomeric excess, SFC – supercritical fluid chromatography, TLC – thin-layer chromatography, IPA – isopropanol

**General Procedure for Pd-Catalyzed Allylic Alkylation Reactions**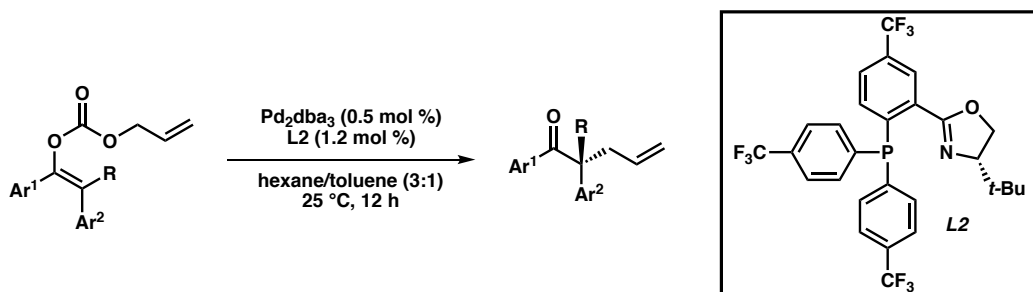

In a nitrogen-filled glovebox, a solution of  $\text{Pd}_2(\text{dba})_3$  (1.8 mg/mL) and **L2** (2.8 mg/mL) in toluene was stirred for 30 minutes at 25 °C, then 0.5 mL of the resulting catalyst solution was added to a one dram vial containing allyl enol carbonate substrate (0.2 mmol) dissolved in hexanes (1.5 mL). The vial was sealed with a Teflon-lined cap, removed from the glovebox, and stirred at 25 °C for 12 h. The crude reaction mixture was concentrated then purified by silica gel flash chromatography to provide the desired alkylation product.

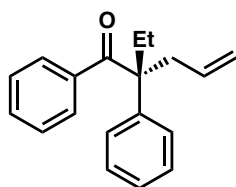**(*R*)-2-ethyl-1,2-diphenylpent-4-en-1-one (2a)**

Purified by column chromatography (4%  $\text{Et}_2\text{O}$  in hexanes) to provide a colorless oil (51.1 mg, 97% yield); 91% ee,  $[\alpha]_{\text{D}}^{25} -107.5$  ( $c$  1.0,  $\text{CHCl}_3$ );  $^1\text{H}$  NMR (400 MHz,  $\text{CDCl}_3$ )  $\delta$  7.44–7.33 (m, 5H), 7.31–7.25 (m, 3H), 7.24–7.17 (m, 2H), 5.38 (dddd,  $J = 16.8, 10.3, 8.2, 6.5$  Hz, 1H), 5.03–4.85 (m, 2H), 2.91–2.72 (m, 2H), 2.16 (qd,  $J = 7.4, 3.3$  Hz, 2H), 0.69 (t,  $J = 7.5$  Hz, 3H);  $^{13}\text{C}$  NMR (100 MHz,  $\text{CDCl}_3$ )  $\delta$  203.3, 142.7, 137.3, 133.6, 131.8, 129.5, 129.0, 128.1, 127.1, 127.0, 118.3, 58.2, 39.3, 26.9, 8.0; IR (Neat Film, NaCl) 3065, 2973, 2940, 2879, 1675, 1597, 1578, 1496, 1446, 1227, 1182, 1142, 1004, 917, 839, 764, 714, 702, 654  $\text{cm}^{-1}$ ; HRMS (MM:ESI-APCI+)  $m/z$  calc'd for  $\text{C}_{19}\text{H}_{21}\text{O}$   $[\text{M}+\text{H}]^+$ : 265.1587, found 265.1577; SFC Conditions: 2% IPA, 2.5 mL/min, Chiralpak AD-H column,  $\lambda = 210$  nm,  $t_{\text{R}}$  (min): minor = 5.33, major = 5.76.

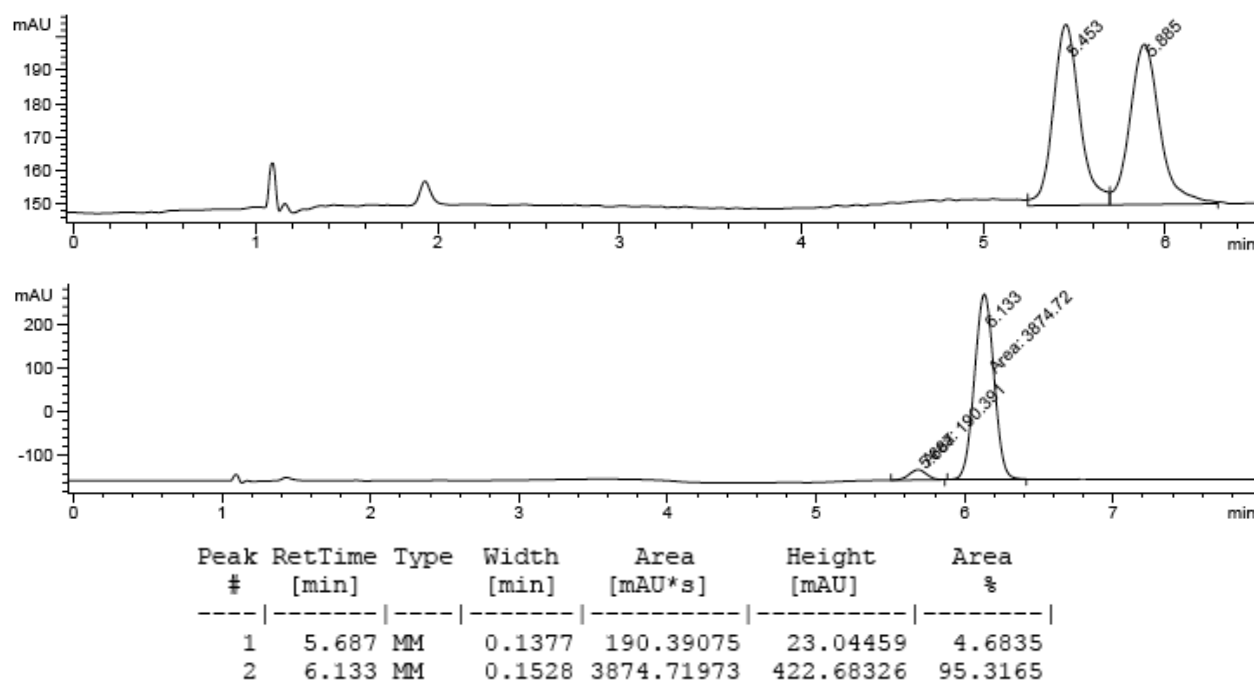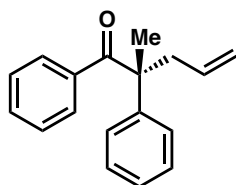

**(R)-2-methyl-1,2-diphenylpent-4-en-1-one (2b)**

Purified by column chromatography (3% Et<sub>2</sub>O in hexanes) to provide a colorless oil (48.3 mg, 96% yield); 67% ee,  $[\alpha]_D^{25} -111.9$  (*c* 1.00, CHCl<sub>3</sub>); <sup>1</sup>H NMR (400 MHz, CDCl<sub>3</sub>) δ 7.48–7.42 (m, 2H), 7.40–7.33 (m, 3H), 7.33–7.27 (m, 3H), 7.24–7.18 (m, 2H), 5.51 (dddd, *J* = 17.0, 10.2, 7.7, 6.9 Hz, 1H), 5.08–4.87 (m, 2H), 2.89–2.71 (m, 2H), 1.58 (s, 3H); <sup>13</sup>C NMR (100 MHz, CDCl<sub>3</sub>) δ 203.3, 143.6, 136.9, 134.1, 131.8, 129.7, 129.1, 128.1, 127.1, 126.4, 118.5, 54.4, 44.8, 23.8; IR (Neat Film, NaCl) 3065, 3024, 2977, 2935, 1677, 1638, 1597, 1578, 1496, 1446, 1376, 1240, 1182, 1139, 1078, 1028, 1001, 970, 917, 762, 716, 701 cm<sup>-1</sup>; HRMS (MM:ESI-APCI+) *m/z* calc'd for C<sub>18</sub>H<sub>19</sub>O [M+H]<sup>+</sup>: 251.1430, found 251.1418; SFC Conditions: 2% IPA, 2.5 mL/min, Chiralpak AD-H column, λ = 210 nm, *t<sub>R</sub>* (min): minor = 7.02, major = 7.44.

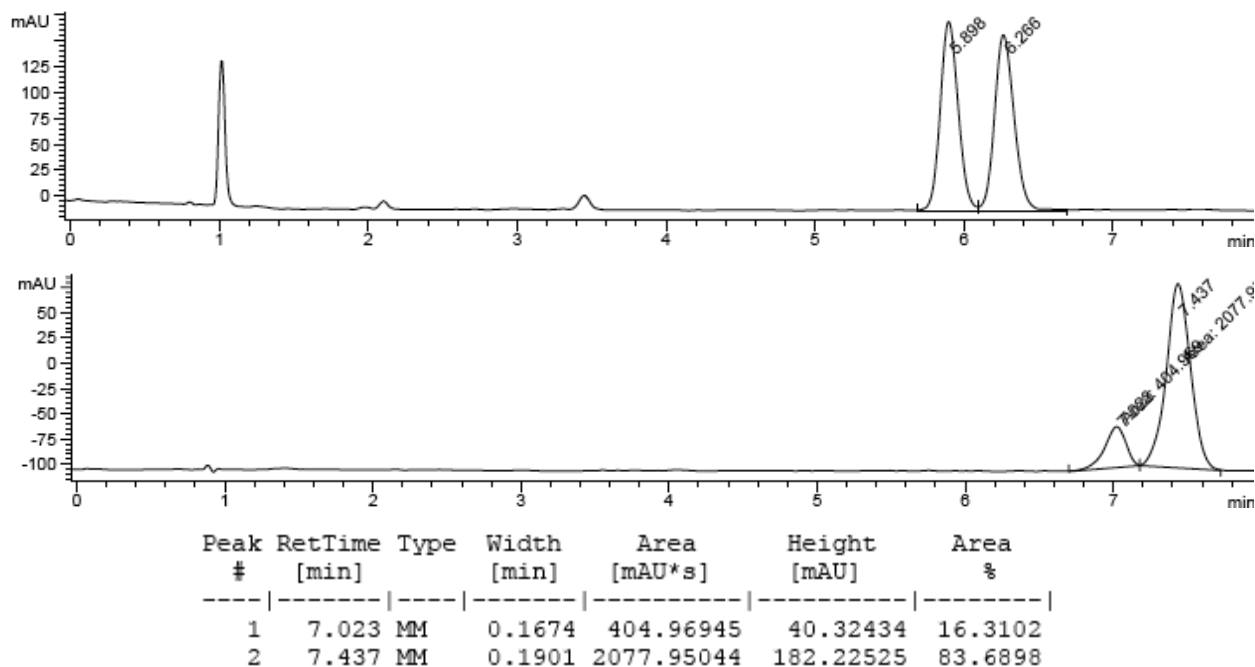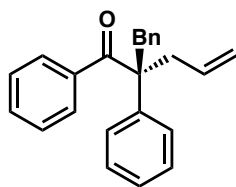

**(S)-2-benzyl-1,2-diphenylpent-4-en-1-one (2c)**

Purified by column chromatography (3% Et<sub>2</sub>O in hexanes) to provide a white solid (64.9 mg, 99% yield); 76% ee,  $[\alpha]_D^{25} +102.5$  (*c* 1.00, CHCl<sub>3</sub>); <sup>1</sup>H NMR (500 MHz, CDCl<sub>3</sub>) δ 7.48–7.40 (m, 2H), 7.37–7.23 (m, 4H), 7.23–7.13 (m, 2H), 7.12–6.97 (m, 5H), 6.58–6.49 (m, 2H), 5.64 (ddt, *J* = 17.2, 10.2, 7.1 Hz, 1H), 5.07–4.97 (m, 1H), 4.84 (dd, *J* = 17.0, 1.8 Hz, 1H), 3.41–3.26 (m, 2H), 2.90–2.67 (m, 2H); <sup>13</sup>C NMR (100 MHz, CDCl<sub>3</sub>) δ 202.2, 142.2, 137.2, 137.1, 133.2, 131.9, 130.9, 129.9, 129.0, 128.1, 127.6, 127.4, 127.3, 126.3, 119.4, 59.0, 42.1, 37.9; IR (Neat Film, NaCl) 3062, 1674, 1597, 1579, 1496, 1446, 1269, 1216, 1180, 1078, 1026, 912, 768, 722, 701 cm<sup>-1</sup>; HRMS (MM:ESI-APCI+) *m/z* calc'd for C<sub>24</sub>H<sub>23</sub>O [M+H]<sup>+</sup>: 327.1743, found 327.1748; SFC Conditions: 10% IPA, 2.5 mL/min, Chiralcel OD-H column, λ = 210 nm, *t<sub>R</sub>* (min): minor = 5.47, major = 5.97.

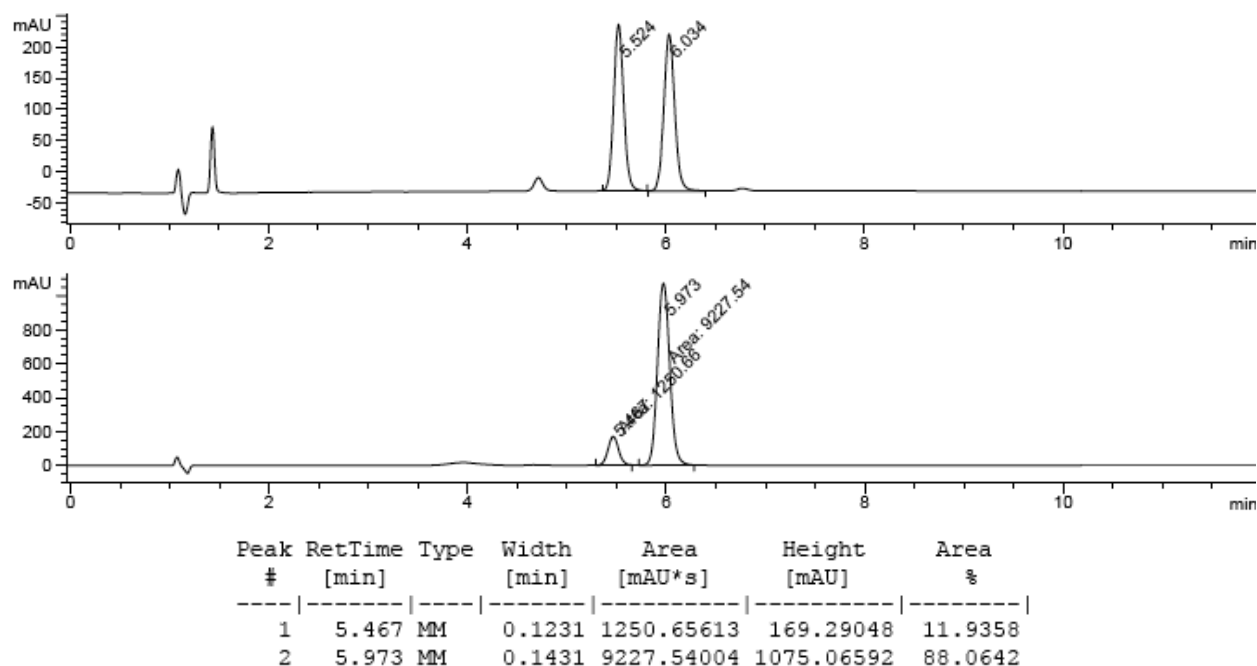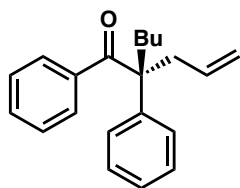

**(R)-2-allyl-1,2-diphenylhexan-1-one (2d)**

Purified by column chromatography (3% Et<sub>2</sub>O in hexanes) to provide a colorless oil (58.2 mg, 99% yield); 87% ee,  $[\alpha]_D^{25} -112.6$  (*c* 1.00, CHCl<sub>3</sub>); <sup>1</sup>H NMR (500 MHz, CDCl<sub>3</sub>) δ 7.41–7.28 (m, 5H), 7.28–7.20 (m, 3H), 7.16 (dd, *J* = 8.2, 7.0 Hz, 2H), 5.35 (dddd, *J* = 16.8, 10.3, 7.9, 6.7 Hz, 1H), 4.98–4.80 (m, 2H), 2.92–2.67 (m, 2H), 2.06 (dt, *J* = 9.9, 4.9 Hz, 2H), 1.23–0.99 (m, 3H), 0.96–0.78 (m, 1H), 0.71 (t, *J* = 7.1 Hz, 3H); <sup>13</sup>C NMR (100 MHz, CDCl<sub>3</sub>) δ 203.3, 142.8, 137.3, 133.7, 131.7, 129.5, 129.0, 128.0, 127.1, 126.9, 118.3, 57.8, 40.0, 33.8, 25.6, 23.2, 13.9; IR (Neat Film, NaCl) 3064, 2956, 2871, 2861, 1676, 1639, 1597, 1578, 1496, 1466, 1446, 1254, 1240, 1212, 1181, 1144, 1001, 918, 764, 720, 701 cm<sup>-1</sup>; HRMS (MM:ESI-APCI+) *m/z* calc'd for C<sub>21</sub>H<sub>25</sub>O [M+H]<sup>+</sup>: 293.1900, found 293.1898; SFC Conditions: 5% IPA, 2.5 mL/min, Chiralpak AD-H column, λ = 210 nm, *t*<sub>R</sub> (min): minor = 4.44, major = 5.27.

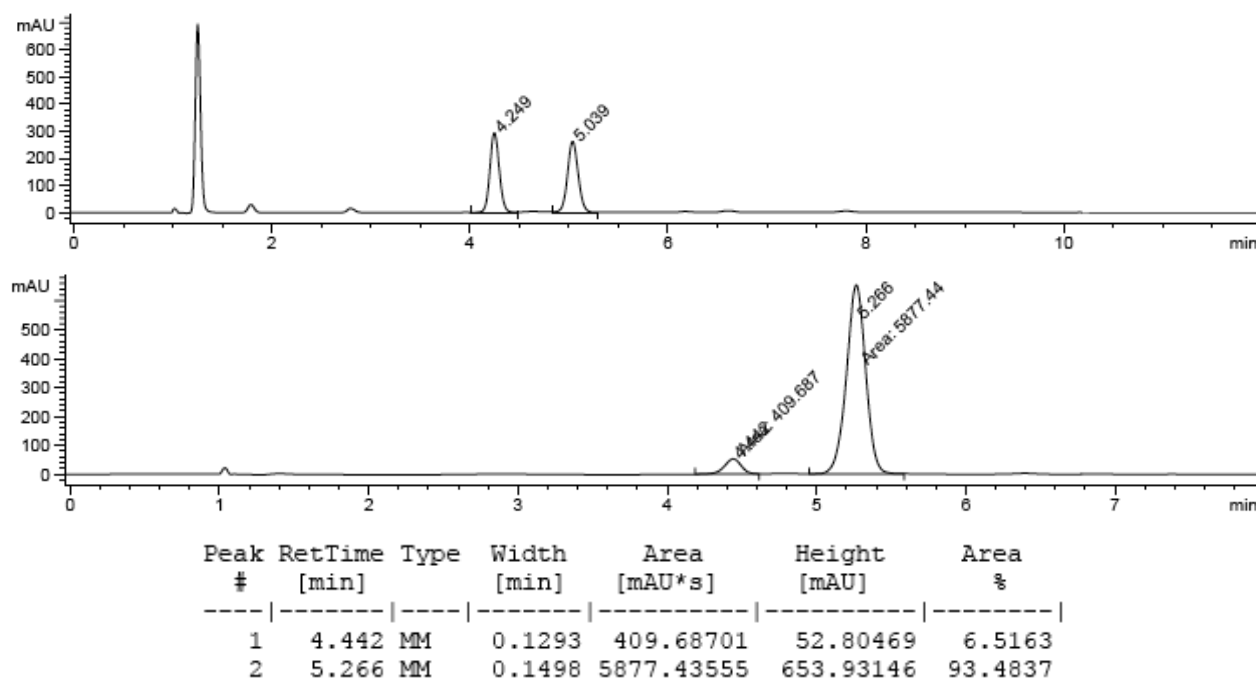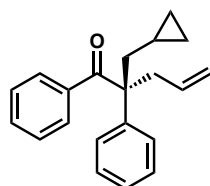

**(S)-2-(cyclopropylmethyl)-1,2-diphenylpent-4-en-1-one (2e)**

Purified by column chromatography (3% Et<sub>2</sub>O in hexanes) to provide a colorless oil (56.5 mg, 97% yield); 91% ee,  $[\alpha]_D^{25}$  -57.6 (*c* 1.00, CHCl<sub>3</sub>); <sup>1</sup>H NMR (500 MHz, CDCl<sub>3</sub>) δ 7.48–7.43 (m, 2H), 7.37–7.33 (m, 3H), 7.30–7.25 (m, 3H), 7.22–7.17 (m, 2H), 5.42 (ddt, *J* = 17.3, 10.2, 7.2 Hz, 1H), 5.04–4.80 (m, 2H), 3.04 (dt, *J* = 7.2, 1.3 Hz, 2H), 2.16 (dd, *J* = 14.1, 6.1 Hz, 1H), 2.03 (dd, *J* = 14.1, 7.0 Hz, 1H), 0.49–0.38 (m, 1H), 0.36–0.22 (m, 2H), -0.09 (dtd, *J* = 8.4, 5.0, 3.7 Hz, 1H), -0.18 – -0.27 (m, 1H); <sup>13</sup>C NMR (100 MHz, CDCl<sub>3</sub>) δ 202.9, 143.1, 137.1, 133.8, 131.8, 129.8, 129.0, 128.1, 127.1, 126.9, 118.5, 58.8, 40.1, 39.3, 5.9, 4.9, 4.5; IR (Neat Film, NaCl) 3075, 3003, 2936, 1676, 1639, 1597, 1579, 1496, 1446, 1273, 1221, 1181, 1151, 1019, 919, 762, 719, 701 cm<sup>-1</sup>; HRMS (MM:ESI-APCI+) *m/z* calc'd for C<sub>21</sub>H<sub>23</sub>O [M+H]<sup>+</sup>: 291.1743, found 291.1743; SFC Conditions: 5% IPA, 2.5 mL/min, Chiralpak AD-H column, λ = 210 nm, *t<sub>R</sub>* (min): minor = 6.27, major = 6.97.

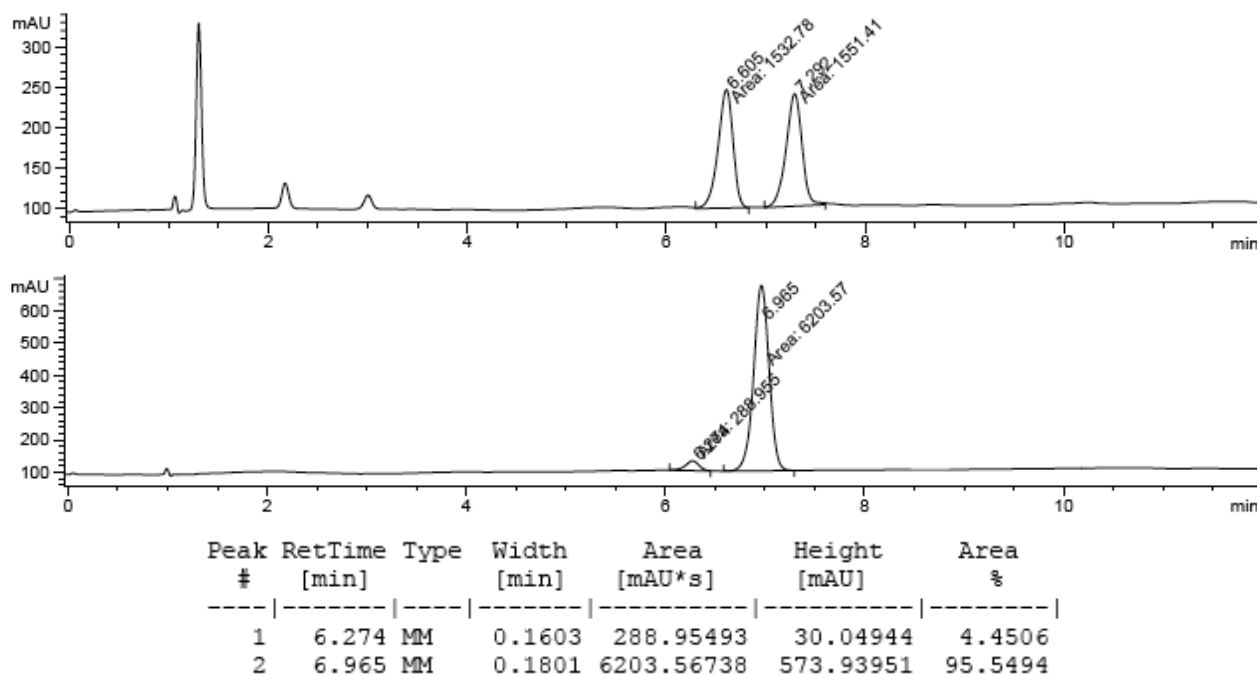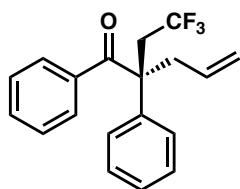

**(S)-1,2-diphenyl-2-(2,2,2-trifluoroethyl)pent-4-en-1-one (2f)**

Purified by preparative TLC (10% Et<sub>2</sub>O in hexanes) to provide a colorless oil (57.1 mg, 90% yield); 86% ee,  $[\alpha]_D^{25} +78.0$  (*c* 1.00, CHCl<sub>3</sub>); <sup>1</sup>H NMR (500 MHz, CDCl<sub>3</sub>) δ 7.49–7.31 (m, 8H), 7.24–7.18 (m, 2H), 5.45 (ddt, *J* = 17.3, 10.2, 7.3 Hz, 1H), 5.08 (ddt, *J* = 10.2, 1.9, 1.0 Hz, 1H), 4.96 (dq, *J* = 17.0, 1.5 Hz, 1H), 3.27–3.16 (m, 1H), 3.15 – 2.88 (m, 3H); <sup>13</sup>C NMR (100 MHz, CDCl<sub>3</sub>) δ 200.4, 139.8, 136.4, 132.1, 131.8, 129.7, 129.4, 128.3, 128.0, 126.8 (q, *J* = 272.9 Hz), 126.7, 120.6, 55.5 (d, *J* = 1.5 Hz), 39.1 (q, *J* = 26.7 Hz), 38.5 (d, *J* = 1.8 Hz); <sup>19</sup>F NMR (282 MHz, CDCl<sub>3</sub>) δ –58.4 (t, *J* = 11.1 Hz); IR (Neat Film, NaCl) 3067, 3027, 2985, 1678, 1642, 1598, 1579, 1498, 1371, 1272, 1260, 1219, 1202, 1184, 1142, 1118, 1087, 1045, 1025, 982, 926, 765, 727, 701 cm<sup>–1</sup>; HRMS (MM:ESI-APCI+) *m/z* calc'd for C<sub>19</sub>H<sub>18</sub>F<sub>3</sub>O [M+H]<sup>+</sup>: 319.1304, found 319.1293; SFC Conditions: 5% IPA, 2.5 mL/min, Chiralpak AD-H column, λ = 210 nm, *t*<sub>R</sub> (min): minor = 1.73, major = 2.17.

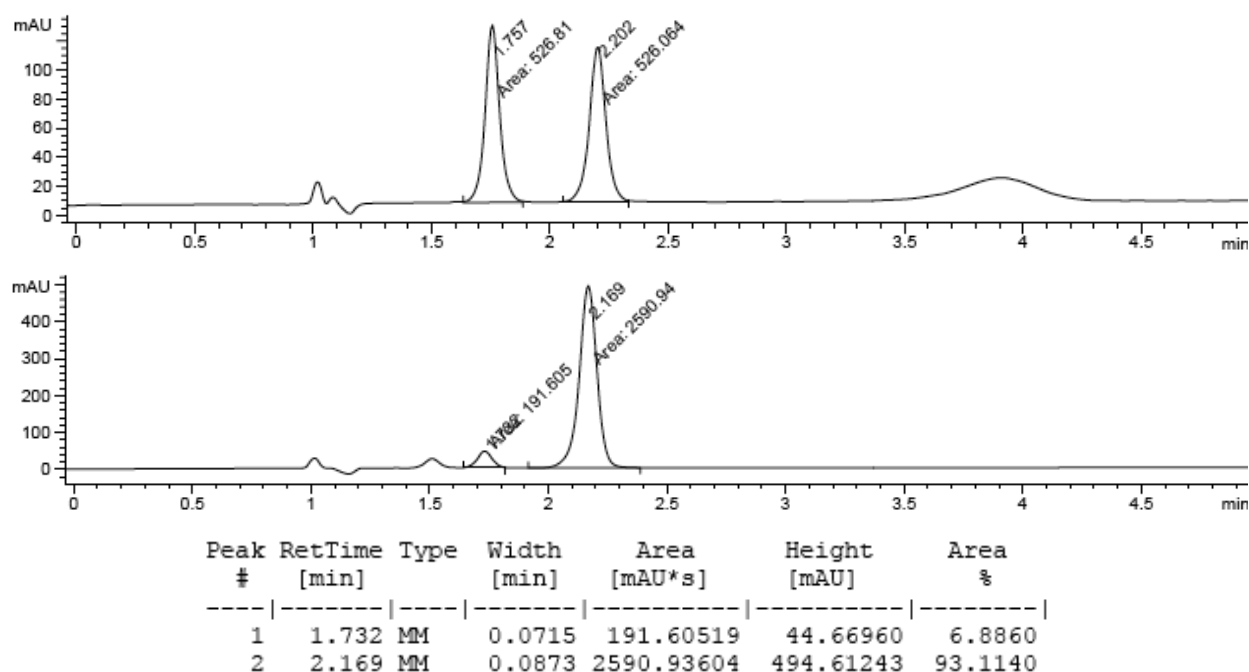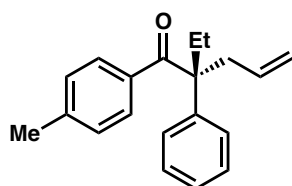

**(*R*)-2-ethyl-1-phenyl-1-(*p*-tolyl)pent-4-en-1-one (2g)**

Purified by column chromatography (4% Et<sub>2</sub>O in hexanes) to provide a colorless oil (52.1 mg, 94% yield); 90% ee,  $[\alpha]_D^{25}$  –99.1 (*c* 1.00, CHCl<sub>3</sub>); <sup>1</sup>H NMR (500 MHz, CDCl<sub>3</sub>) δ 7.39–7.31 (m, 4H), 7.31–7.21 (m, 3H), 7.04–6.97 (m, 2H), 5.38 (dddd, *J* = 16.7, 10.2, 8.3, 6.4 Hz, 1H), 4.99–4.88 (m, 2H), 2.87 (ddt, *J* = 14.2, 8.3, 1.0 Hz, 1H), 2.78 (ddt, *J* = 14.2, 6.3, 1.4 Hz, 1H), 2.28 (s, 3H), 2.20–2.11 (m, 2H), 0.69 (t, *J* = 7.4 Hz, 3H); <sup>13</sup>C NMR (100 MHz, CDCl<sub>3</sub>) δ 202.7, 143.1, 142.4, 134.4, 133.7, 129.7, 128.9, 128.8, 127.0, 127.0, 118.2, 58.1, 39.5, 27.0, 21.6, 8.0; IR (Neat Film, NaCl) 3063, 3026, 2973, 2879, 1673, 1640, 1606, 1496, 1446, 1230, 1182, 1001, 916, 824, 774, 740, 704 cm<sup>–1</sup>; HRMS (MM:ESI-APCI+) *m/z* calc'd for C<sub>20</sub>H<sub>23</sub>O [M+H]<sup>+</sup>: 279.1743, found 279.1754; SFC Conditions(for cross-metathesis product, see pg S33): 5% IPA, 2.5 mL/min, Chiralcel OB-H column, λ = 210 nm, *t<sub>R</sub>* (min): minor = 4.14, major = 4.95.

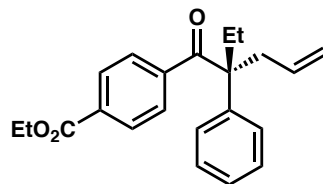

**ethyl (*R*)-4-(2-ethyl-2-phenylpent-4-enyl)benzoate (2h)**

Purified by column chromatography (5% Et<sub>2</sub>O in hexanes) to provide a white solid (66.4 mg, 99% yield); 90% ee,  $[\alpha]_D^{25} -79.7$  (*c* 1.00, CHCl<sub>3</sub>); <sup>1</sup>H NMR (400 MHz, CDCl<sub>3</sub>) δ 7.90–7.84 (m, 2H), 7.45–7.34 (m, 4H), 7.33–7.24 (m, 3H), 5.44–5.30 (m, 1H), 5.07–4.83 (m, 2H), 4.33 (q, *J* = 7.1 Hz, 2H), 2.83 (dt, *J* = 7.6, 1.2 Hz, 2H), 2.14 (qq, *J* = 14.4, 7.3, 6.9 Hz, 2H), 1.34 (t, *J* = 7.1 Hz, 3H), 0.69 (t, *J* = 7.4 Hz, 3H); <sup>13</sup>C NMR (100 MHz, CDCl<sub>3</sub>) δ 203.0, 165.9, 142.1, 140.9, 133.2, 132.9, 129.3, 129.3, 129.1, 127.4, 127.0, 118.5, 61.4, 58.4, 39.0, 26.7, 14.4, 7.9; IR (Neat Film, NaCl) 3076, 2977, 2940, 2879, 1722, 1581, 1649, 1599, 1580, 1570, 1495, 1462, 1446, 1404, 1367, 1312, 1276, 1225, 1180, 1107, 1017, 1001, 918, 833, 788, 767, 727, 703 cm<sup>-1</sup>; HRMS (MM:ESI-APCI+) *m/z* calc'd for C<sub>22</sub>H<sub>25</sub>O<sub>3</sub> [M+H]<sup>+</sup>: 337.1798, found 337.1786; SFC Conditions(for cross-metathesis product, see pg S34): 7% IPA, 2.5 mL/min, Chiralcel OD-H column, λ = 210 nm, t<sub>R</sub> (min): minor = 9.38, major = 10.31.

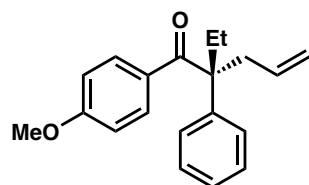

**(*R*)-2-ethyl-1-(4-methoxyphenyl)-2-phenylpent-4-en-1-one (2i)**

Purified by column chromatography (5% Et<sub>2</sub>O in hexanes) to provide a colorless oil (58.4 mg, 99% yield); 91% ee,  $[\alpha]_D^{25} -91.9$  (*c* 1.00, CHCl<sub>3</sub>); <sup>1</sup>H NMR (500 MHz, CDCl<sub>3</sub>) δ 7.51–7.45 (m, 2H), 7.38–7.31 (m, 2H), 7.26 (tt, *J* = 6.5, 1.1 Hz, 4H), 6.69 (d, *J* = 9.0 Hz, 1H), 5.38 (dddd, *J* = 16.8, 10.3, 8.3, 6.3 Hz, 1H), 5.03–4.85 (m, 2H), 3.76 (s, 3H), 2.87 (ddt, *J* = 14.2, 8.3, 1.0 Hz, 1H), 2.77 (ddt, *J* = 14.2, 6.4, 1.4 Hz, 1H), 2.19–2.12 (m, 2H), 0.69 (t, *J* = 7.4 Hz, 3H); <sup>13</sup>C NMR (100 MHz, CDCl<sub>3</sub>) δ 201.5, 162.3, 143.4, 133.8, 132.0, 129.7, 128.9, 126.9, 118.1, 113.2, 57.9, 55.4, 39.6, 27.2, 8.0; IR (Neat Film, NaCl) 3075, 3004, 2971, 2938, 2839, 1667, 1600, 1574, 1508, 1496, 1459, 1445, 1417, 1307, 1258, 1238, 1174, 1142, 1033, 998, 916, 837, 778, 750, 703 cm<sup>-1</sup>; HRMS (MM:ESI-APCI+) *m/z* calc'd for C<sub>20</sub>H<sub>23</sub>O<sub>2</sub> [M+H]<sup>+</sup>: 295.1693, found 295.1688;

SFC Conditions: 5% IPA, 2.5 mL/min, Chiralpak OJ-H column,  $\lambda = 210$  nm,  $t_R$  (min): minor = 4.35, major = 4.60.

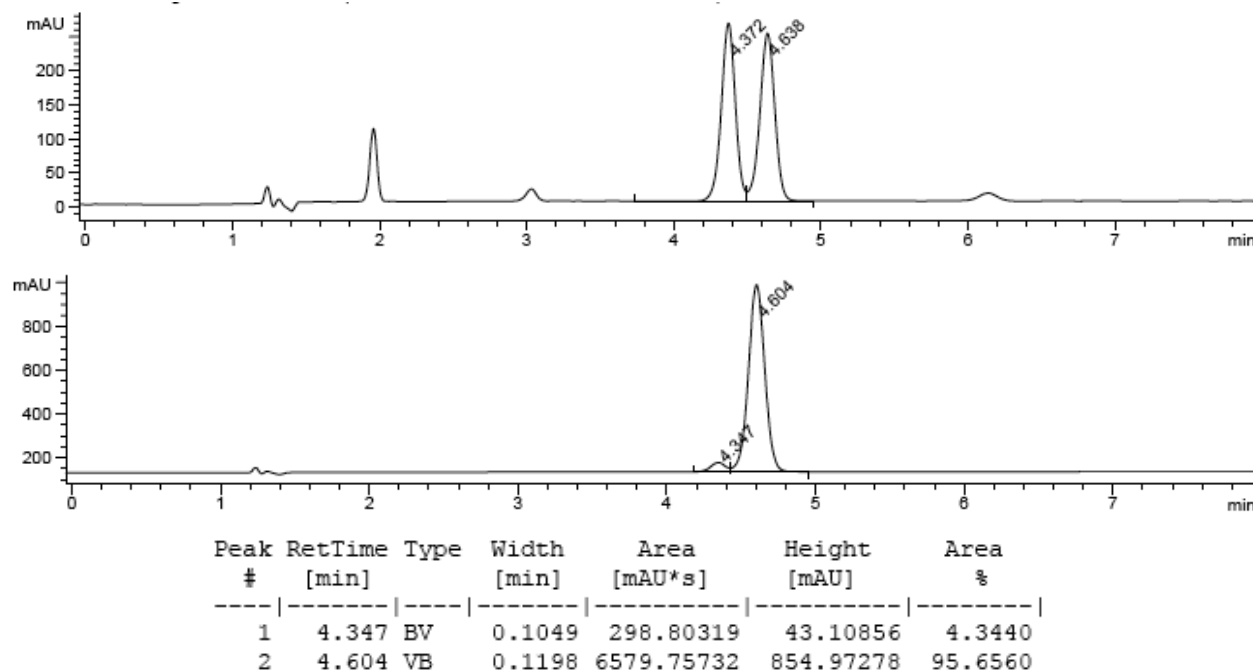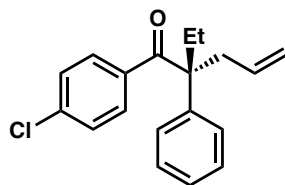

**(*R*)-1-(4-chlorophenyl)-2-ethyl-2-phenylpent-4-en-1-one (2j)**

Purified by column chromatography (4% Et<sub>2</sub>O in hexanes) to provide a colorless oil (57.1 mg, 96% yield); 91% ee,  $[\alpha]_D^{25} -91.3$  ( $c$  1.00, CHCl<sub>3</sub>); <sup>1</sup>H NMR (500 MHz, CDCl<sub>3</sub>)  $\delta$  7.39–7.34 (m, 4H), 7.31–7.27 (m, 1H), 7.27–7.23 (m, 2H), 7.19–7.15 (m, 2H), 5.36 (dddd,  $J = 16.8, 10.2, 8.2, 6.4$  Hz, 1H), 5.00–4.87 (m, 2H), 2.86–2.76 (m, 2H), 2.23–2.04 (m, 2H), 0.69 (t,  $J = 7.4$  Hz, 3H); <sup>13</sup>C NMR (100 MHz, CDCl<sub>3</sub>)  $\delta$  201.9, 142.5, 138.1, 135.4, 133.3, 131.0, 129.1, 128.4, 127.3, 126.9, 118.5, 58.2, 39.2, 26.9, 8.0; IR (Neat Film, NaCl) 3074, 2973, 2940, 2878, 1677, 1640, 1586, 1486, 1446, 1398, 1225, 1178, 1093, 1001, 917, 827, 775, 744, 703 cm<sup>-1</sup>; HRMS (MM:ESI-APCI+)  $m/z$  calc'd for C<sub>19</sub>H<sub>20</sub>ClO  $[M+H]^+$ : 299.1197, found 299.1201; SFC Conditions: 10% IPA, 2.5 mL/min, Chiralpak AD-H column,  $\lambda = 210$  nm,  $t_R$  (min): minor = 6.09, major = 6.64.

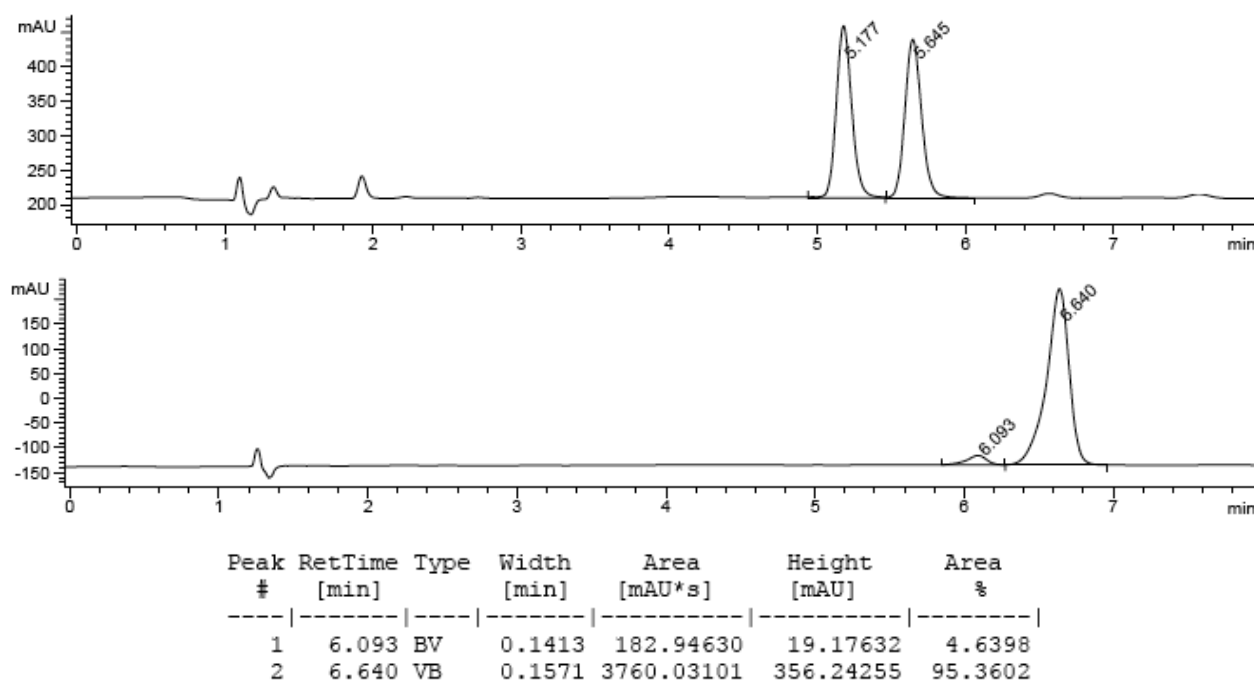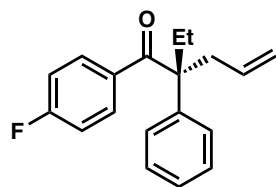

**(R)-2-ethyl-1-(4-fluorophenyl)-2-phenylpent-4-en-1-one (2k)**

Purified by column chromatography (4% Et<sub>2</sub>O in hexanes) to provide a colorless oil (54.1 mg, 96% yield); 91% ee,  $[\alpha]_D^{25} -111.7$  (*c* 1.00, CHCl<sub>3</sub>); <sup>1</sup>H NMR (400 MHz, CDCl<sub>3</sub>)  $\delta$  7.50–7.43 (m, 2H), 7.40–7.31 (m, 2H), 7.32–7.23 (m, 3H), 6.91–6.82 (m, 2H), 5.37 (dddd, *J* = 16.8, 10.2, 8.2, 6.4 Hz, 1H), 5.00–4.87 (m, 2H), 2.91–2.72 (m, 2H), 2.27–1.97 (m, 2H), 0.69 (t, *J* = 7.5 Hz, 3H); <sup>19</sup>F NMR (282 MHz)  $\delta$  –107.1 (tt, *J* = 8.5, 5.5 Hz); <sup>13</sup>C NMR (100 MHz, CDCl<sub>3</sub>)  $\delta$  201.5, 164.7 (d, *J* = 253.6 Hz), 142.7, 133.4, 133.3 (d, *J* = 3.3 Hz), 132.2 (d, *J* = 8.9 Hz), 129.1, 127.2, 126.9, 118.4, 115.1 (d, *J* = 21.5 Hz), 58.1, 39.3, 27.0, 8.0; IR (Neat Film, NaCl) 3076, 2973, 2940, 1677, 1639, 1598, 1504, 1446, 1231, 1158, 1143, 1000, 917, 841, 777, 747, 704 cm<sup>–1</sup>; HRMS (MM:ESI-APCI+) *m/z* calc'd for C<sub>19</sub>H<sub>20</sub>FO [M+H]<sup>+</sup>: 283.1493, found 283.1479; SFC Conditions (on cross-metathesis pdt, see pg S35): 5% IPA, 2.5 mL/min, Chiralcel OD-H column,  $\lambda$  = 210 nm, *t<sub>R</sub>* (min): minor = 7.43, major = 8.03.

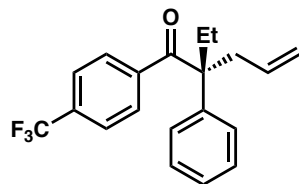

**(*R*)-2-ethyl-2-phenyl-1-(4-(trifluoromethyl)phenyl)pent-4-en-1-one (2l)**

Purified by column chromatography (4% Et<sub>2</sub>O in hexanes) to provide a colorless oil (65.5 mg, 99% yield); 90% ee,  $[\alpha]_D^{25}$  -95.1 (*c* 1.00, CHCl<sub>3</sub>); <sup>1</sup>H NMR (500 MHz, CDCl<sub>3</sub>) δ 7.47 (s, 4H), 7.41–7.36 (m, 2H), 7.34–7.29 (m, 1H), 7.29–7.25 (m, 2H), 5.37 (ddt, *J* = 17.0, 10.2, 7.3 Hz, 1H), 5.02–4.87 (m, 2H), 2.83 (dt, *J* = 7.3, 1.2 Hz, 2H), 2.26–2.05 (m, 2H), 0.70 (t, *J* = 7.4 Hz, 3H); <sup>19</sup>F NMR (282 MHz) δ -63.2 (s); <sup>13</sup>C NMR (100 MHz, CDCl<sub>3</sub>) δ 202.4, 141.9, 140.3, 133.1, 133.1 (q, *J* = 32.6 Hz) 129.7, 129.2, 127.5, 126.9, 125.1 (q, *J* = 3.7 Hz), 123.7 (q, *J* = 272.5) 118.6, 58.4, 39.0, 26.7, 7.9; IR (Neat Film, NaCl) 3078, 2974, 2942, 2880, 1683, 1641, 1599, 1580, 1494, 1461, 1446, 1407, 1326, 1227, 1170, 1131, 1069, 1016, 1001, 918, 849, 834, 781, 754, 702 cm<sup>-1</sup>; HRMS (MM:ESI-APCI+) *m/z* calc'd for C<sub>20</sub>H<sub>23</sub>F<sub>3</sub>NO [M+NH<sub>4</sub>]<sup>+</sup>: 350.1726, found 350.1723; SFC Conditions (on cross-metathesis pdt, see pg S36): 5% IPA, 2.5 mL/min, Chiralpak AD-H column, λ = 210 nm, *t*<sub>R</sub> (min): minor = 4.47, major = 5.90.

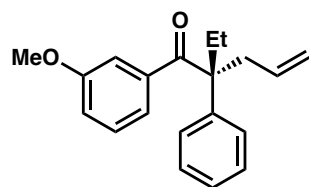

**(*R*)-2-ethyl-1-(3-methoxyphenyl)-2-phenylpent-4-en-1-one (2m)**

Purified by column chromatography (4% Et<sub>2</sub>O in hexanes) to provide a colorless oil (55.9 mg, 95% yield); 91% ee,  $[\alpha]_D^{25}$  -89.4 (*c* 1.00, CHCl<sub>3</sub>); <sup>1</sup>H NMR (500 MHz, CDCl<sub>3</sub>) δ 7.39–7.34 (m, 2H), 7.31–7.26 (m, 3H), 7.09 (ddd, *J* = 8.2, 7.4, 0.7 Hz, 1H), 7.00–6.96 (m, 2H), 6.90 (ddd, *J* = 8.2, 2.5, 1.2 Hz, 1H), 5.38 (dddd, *J* = 16.8, 10.3, 8.2, 6.4 Hz, 1H), 5.04–4.87 (m, 2H), 3.62 (s, 3H), 2.98–2.74 (m, 2H), 2.16 (q, *J* = 7.5 Hz, 2H), 0.70 (t, *J* = 7.4 Hz, 3H); <sup>13</sup>C NMR (100 MHz, CDCl<sub>3</sub>) δ 203.1, 159.1, 142.8, 138.5, 133.6, 129.0, 129.0, 127.1, 127.0, 122.1, 118.4, 118.3, 113.9, 58.2, 55.3, 39.2, 26.9, 8.0; IR (Neat Film, NaCl) 3074, 2970, 2940, 1677, 1640, 1596,

1580, 1487, 1462, 1446, 1425, 1318, 1288, 1258, 1206, 1180, 1046, 917, 790, 773, 738, 703  $\text{cm}^{-1}$ ; HRMS (MM:ESI-APCI+)  $m/z$  calc'd for  $\text{C}_{20}\text{H}_{23}\text{O}_2$   $[\text{M}+\text{H}]^+$ : 295.1693, found 295.1681; SFC Conditions: 2% IPA, 2.5 mL/min, Chiralcel OJ-H column,  $\lambda = 210$  nm,  $t_R$  (min): minor = 5.57, major = 5.95.

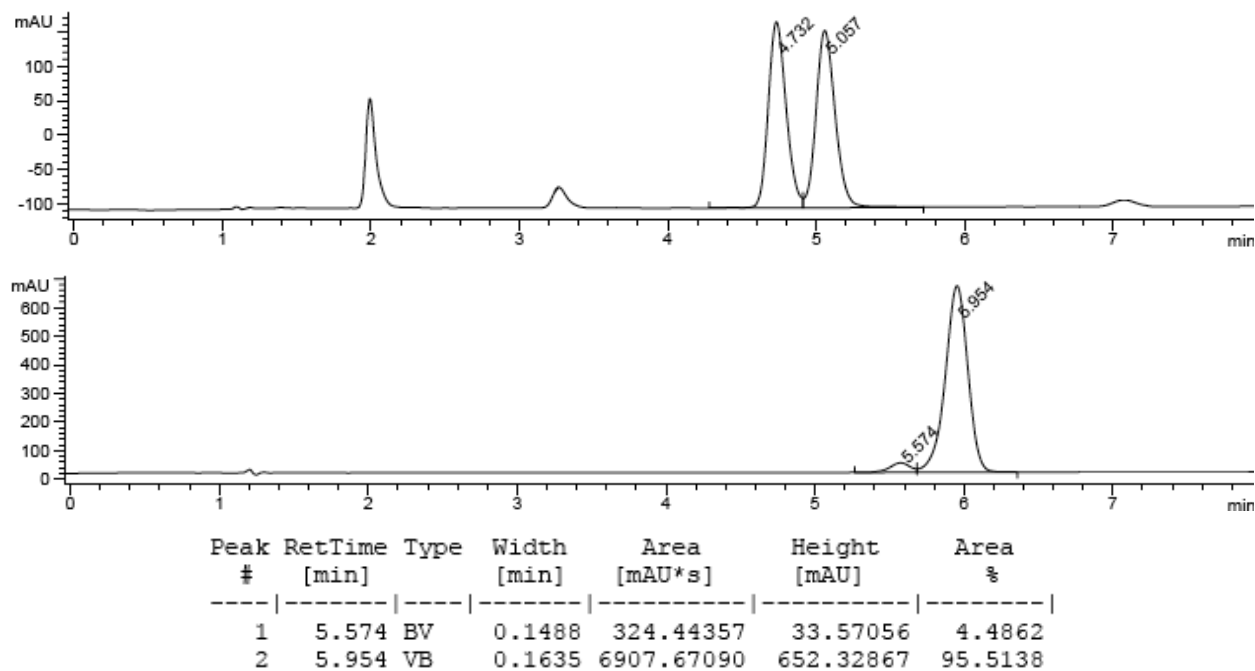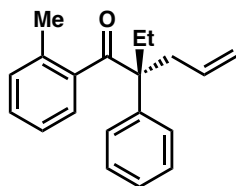

**(*R*)-2-ethyl-2-phenyl-1-(*o*-tolyl)pent-4-en-1-one (2n)**

Purified by column chromatography (3%  $\text{Et}_2\text{O}$  in hexanes) to provide a colorless oil (53.0 mg, 95% yield); 73% ee,  $[\alpha]_D^{25} -62.0$  ( $c$  1.00,  $\text{CHCl}_3$ );  $^1\text{H}$  NMR (500 MHz,  $\text{CDCl}_3$ )  $\delta$  7.30–7.24 (m, 4H), 7.22–7.15 (m, 1H), 7.11–7.04 (m, 2H), 6.74 (dtd,  $J = 8.6, 4.0, 0.7$  Hz, 1H), 6.54 (dt,  $J = 7.8, 1.0$  Hz, 1H), 5.35 (dddd,  $J = 16.9, 10.3, 7.9, 6.6$  Hz, 1H), 4.92–4.75 (m, 2H), 2.75 (ddt,  $J = 7.9, 6.9, 1.3$  Hz, 2H), 2.26 (s, 3H), 2.14–1.87 (m, 2H), 0.62 (t,  $J = 7.4$  Hz, 3H);  $^{13}\text{C}$  NMR (100 MHz,  $\text{CDCl}_3$ )  $\delta$  207.2, 141.9, 138.3, 138.1, 133.7, 131.9, 130.0, 128.9, 127.6, 127.1, 127.0, 124.6, 118.2, 58.7, 38.5, 26.7, 21.1, 7.9; IR (Neat Film, NaCl) 3061, 2972, 2939, 2879, 1680, 1640, 1599, 1493, 1456, 1446, 1381, 1287, 1226, 1121, 997, 916, 847, 764, 755, 734, 702, 652  $\text{cm}^{-1}$ ; HRMS (MM:ESI-APCI+)  $m/z$  calc'd for  $\text{C}_{20}\text{H}_{23}\text{O}$   $[\text{M}+\text{H}]^+$ : 279.1743, found 279.1746; SFC

Conditions (on cross metathesis pdt, see pg S37): 10% IPA, 2.5 mL/min, Chiralpak IC column,  $\lambda$  = 210 nm,  $t_R$  (min): minor = 5.74, major = 6.49.

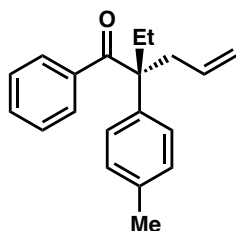

**(*R*)-2-ethyl-1-phenyl-2-(*p*-tolyl)pent-4-en-1-one (2o)**

Purified by column chromatography (4% Et<sub>2</sub>O in hexanes) to provide a colorless oil (53.5 mg, 96% yield); 91% ee,  $[\alpha]_D^{25}$  -107.3 (*c* 1.00, CHCl<sub>3</sub>); <sup>1</sup>H NMR (500 MHz, CDCl<sub>3</sub>)  $\delta$  7.44–7.41 (m, 2H), 7.37–7.33 (m, 1H), 7.23–7.18 (m, 2H), 7.17 (s, 4H), 5.38 (dddd, *J* = 16.8, 10.2, 8.2, 6.4 Hz, 1H), 5.01–4.84 (m, 2H), 2.92–2.74 (m, 2H), 2.35 (s, 3H), 2.20–2.03 (m, 2H), 0.68 (t, *J* = 7.5 Hz, 3H); <sup>13</sup>C NMR (100 MHz, CDCl<sub>3</sub>)  $\delta$  203.6, 139.5, 137.5, 136.7, 133.8, 131.7, 129.7, 129.5, 128.0, 126.8, 118.1, 57.8, 39.2, 26.9, 21.2, 8.0; IR (Neat Film, NaCl) 3069, 2973, 2878, 1676, 1640, 1597, 1578, 1514, 1446, 1228, 1182, 1143, 1020, 1004, 914, 815, 779, 734, 708, 692 cm<sup>-1</sup>; HRMS (MM:ESI-APCI+) *m/z* calc'd for C<sub>20</sub>H<sub>23</sub>O [M+H]<sup>+</sup>: 279.1743, found 279.1733; SFC Conditions: 5% IPA, 2.5 mL/min, Chiralpak AD-H column,  $\lambda$  = 210 nm,  $t_R$  (min): minor = 7.07, major = 8.66.

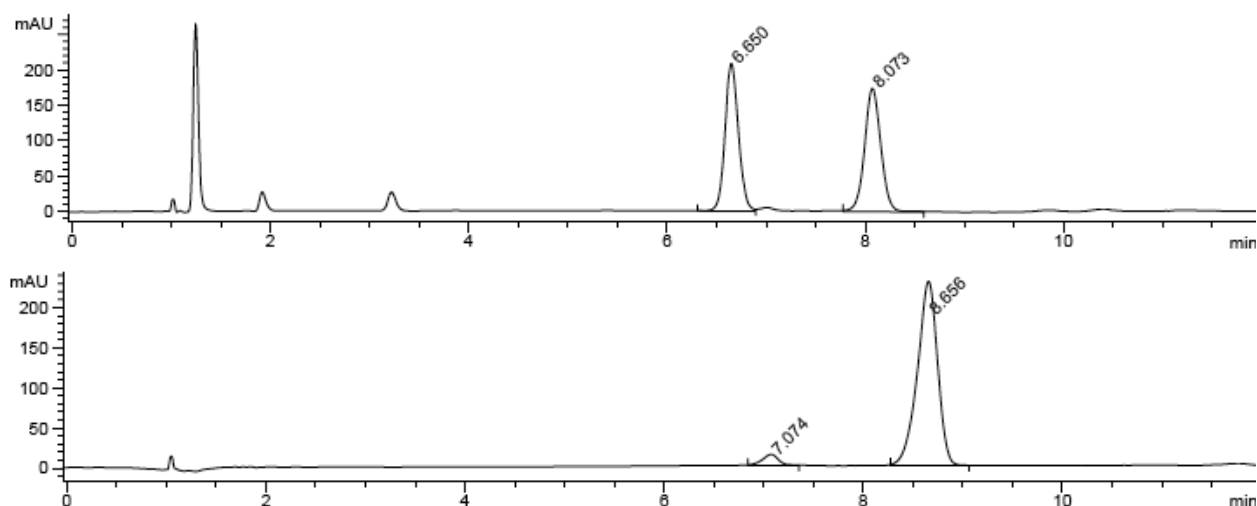

| Peak # | RetTime [min] | Type | Width [min] | Area [mAU*s] | Height [mAU] | Area %  |
|--------|---------------|------|-------------|--------------|--------------|---------|
| 1      | 7.074         | BB   | 0.1685      | 158.56238    | 13.75147     | 4.6612  |
| 2      | 8.656         | BB   | 0.2128      | 3243.18799   | 229.55760    | 95.3388 |

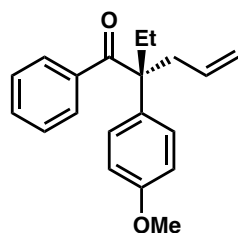

**(*R*)-2-ethyl-2-(4-methoxyphenyl)-1-phenylpent-4-en-1-one (2p)**

Purified by column chromatography (4% Et<sub>2</sub>O in hexanes) to provide a colorless oil (59.0 mg, 99% yield); 92% ee,  $[\alpha]_D^{25} -109.6$  (*c* 1.00, CHCl<sub>3</sub>); <sup>1</sup>H NMR (500 MHz, CDCl<sub>3</sub>) δ 7.45–7.31 (m, 3H), 7.24–7.16 (m, 4H), 6.94–6.87 (m, 2H), 5.39 (dddd, *J* = 16.9, 10.3, 8.0, 6.6 Hz, 1H), 5.04–4.80 (m, 2H), 3.81 (s, 3H), 2.80 (ddt, *J* = 6.7, 5.7, 1.2 Hz, 2H), 2.26–2.01 (m, 2H), 0.68 (t, *J* = 7.4 Hz, 3H); <sup>13</sup>C NMR (100 MHz, CDCl<sub>3</sub>) δ 203.6, 158.6, 137.5, 134.5, 133.7, 131.6, 129.5, 128.1, 128.0, 118.1, 114.3, 57.4, 55.3, 39.3, 26.9, 8.0; IR (Neat Film, NaCl) 3069, 2970, 2836, 1674, 1639, 1609, 1578, 1513, 1262, 1445, 1295, 1251, 1229, 1182, 1143, 1035, 1004, 915, 827, 781, 741, 709, 693 cm<sup>-1</sup>; HRMS (MM:ESI-APCI+) *m/z* calc'd for C<sub>20</sub>H<sub>23</sub>O<sub>2</sub> [M+H]<sup>+</sup>: 295.1693, found 295.1683; SFC Conditions: 5% IPA, 2.5 mL/min, Chiralpak AD-H column, λ = 210 nm, *t*<sub>R</sub> (min): minor = 9.85, major = 11.03

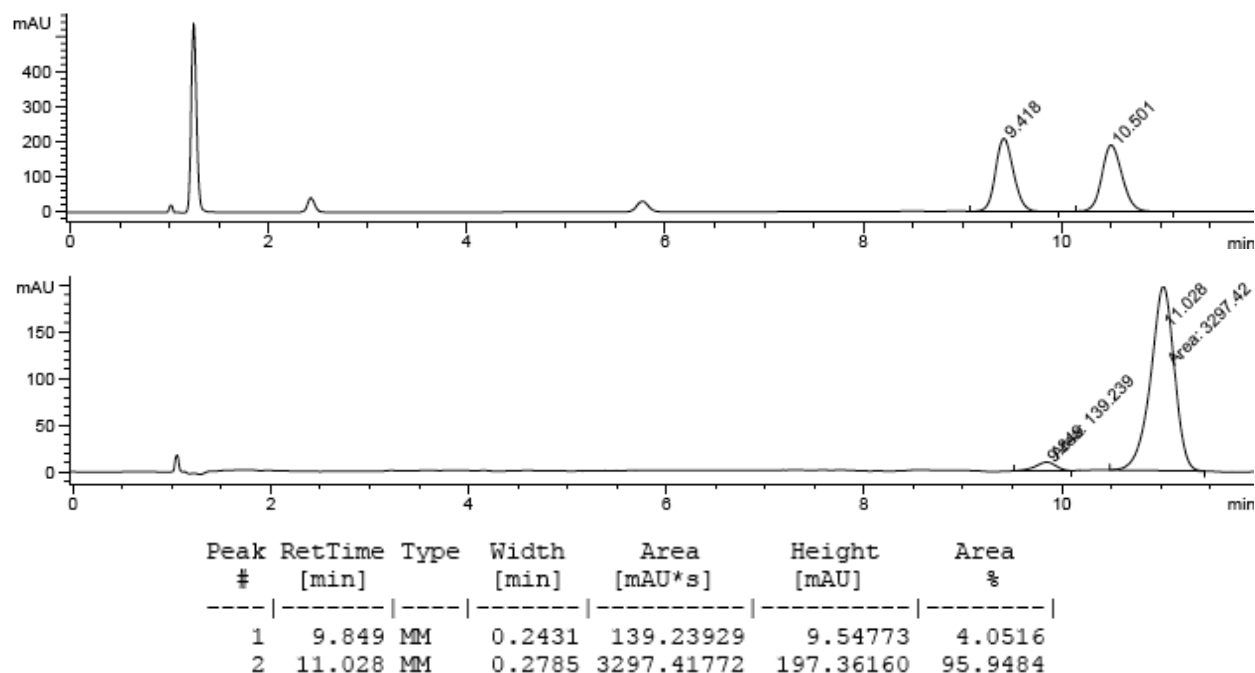

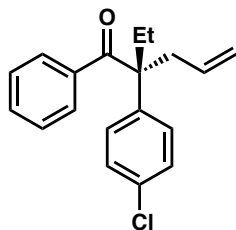

**(*R*)-2-(4-chlorophenyl)-2-ethyl-1-phenylpent-4-en-1-one (2q)**

Purified by column chromatography (3% Et<sub>2</sub>O in hexanes) to provide a colorless oil (59.1 mg, 99% yield); 86% ee,  $[\alpha]_D^{25} -92.7$  (*c* 1.00, CHCl<sub>3</sub>); <sup>1</sup>H NMR (500 MHz, CDCl<sub>3</sub>) δ 7.44–7.40 (m, 2H), 7.40–7.36 (m, 1H), 7.36–7.32 (m, 2H), 7.25–7.19 (m, 4H), 5.36 (dddd, *J* = 16.8, 10.2, 8.3, 6.4 Hz, 1H), 5.02–4.84 (m, 2H), 2.89–2.67 (m, 2H), 2.13 (q, *J* = 7.4 Hz, 2H), 0.69 (t, *J* = 7.4 Hz, 3H); <sup>13</sup>C NMR (100 MHz, CDCl<sub>3</sub>) δ 202.7, 141.4, 136.9, 133.1, 133.0, 132.0, 129.5, 129.2, 128.3, 128.2, 118.7, 57.8, 39.3, 27.0, 8.0; IR (Neat Film, NaCl) 3071, 2972, 2940, 2879, 1676, 1596, 1492, 1446, 1402, 1227, 1181, 1096, 1014, 1004, 917, 821, 784, 725, 691 cm<sup>-1</sup>; HRMS (MM:ESI-APCI+) *m/z* calc'd for C<sub>19</sub>H<sub>20</sub>ClO [M+H]<sup>+</sup>: 299.1197, found 299.1187; SFC Conditions: 5% IPA, 2.5 mL/min, Chiralpak AD-H column, λ = 210 nm, *t*<sub>R</sub> (min): minor = 7.08, major = 8.41.

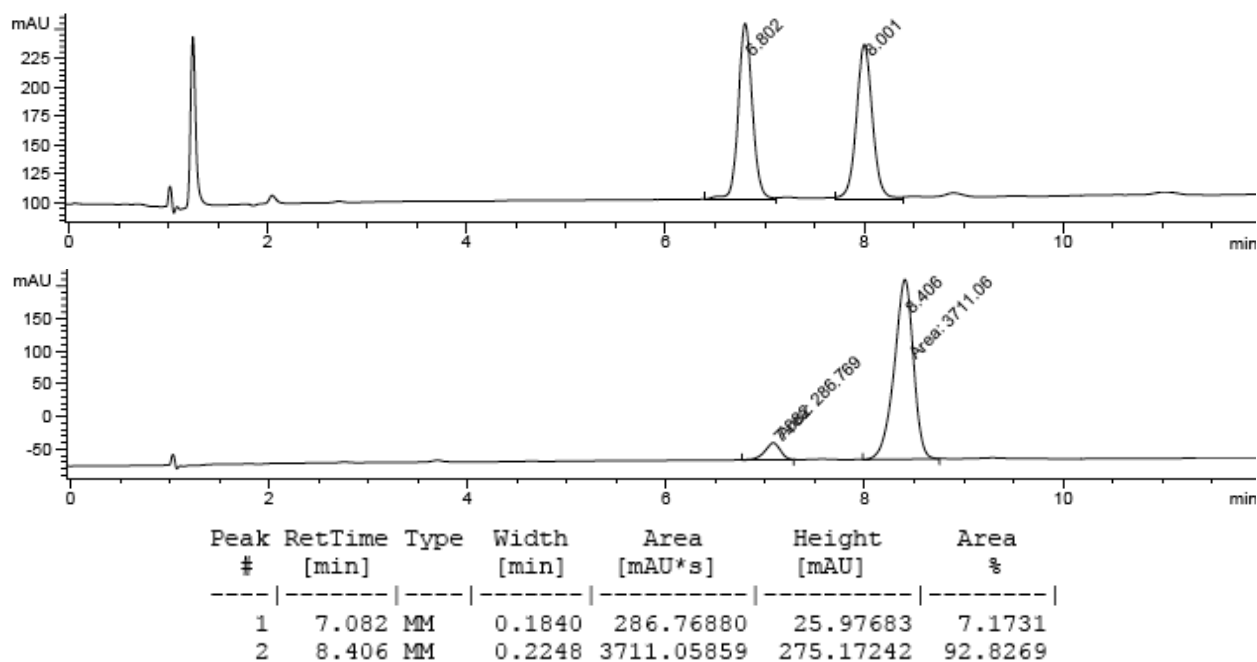

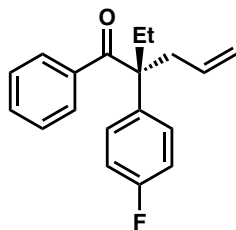

**(*R*)-2-ethyl-2-(4-fluorophenyl)-1-phenylpent-4-en-1-one (2r)**

Purified by column chromatography (4% Et<sub>2</sub>O in hexanes) to provide a colorless oil (55.3 mg, 98% yield); 90% ee,  $[\alpha]_D^{25} -104.7$  (*c* 1.00, CHCl<sub>3</sub>); <sup>1</sup>H NMR (500 MHz, CDCl<sub>3</sub>) δ 7.43–7.35 (m, 3H), 7.26–7.19 (m, 4H), 7.09–7.03 (m, 2H), 5.36 (dddd, *J* = 16.8, 10.2, 8.2, 6.4 Hz, 1H), 5.05–4.84 (m, 2H), 2.90–2.71 (m, 2H), 2.14 (q, *J* = 7.4 Hz, 2H), 0.69 (t, *J* = 7.4 Hz, 3H); <sup>19</sup>F NMR (282 MHz) δ –115.6 (tt, *J* = 8.4, 5.2 Hz); <sup>13</sup>C NMR (100 MHz, CDCl<sub>3</sub>) δ 203.0, 161.9 (d, *J* = 246.2 Hz), 138.5 (d, *J* = 3.4 Hz), 137.1, 133.3, 131.9, 129.5, 128.5 (d, *J* = 7.9 Hz), 128.1, 118.5, 115.9 (d, *J* = 21.2 Hz), 57.7, 39.4, 27.1, 8.0; IR (Neat Film, NaCl) 3073, 2974, 2880, 1675, 1598, 1510, 1446, 1230, 1164, 1004, 917, 829, 816, 782, 737, 707, 692 cm<sup>–1</sup>; HRMS (MM:ESI-APCI+) *m/z* calc'd for C<sub>19</sub>H<sub>20</sub>FO [M+H]<sup>+</sup>: 283.1493, found 283.1491; SFC Conditions: 5% IPA, 2.5 mL/min, Chiralpak AD-H column, λ = 210 nm, *t*<sub>R</sub> (min): minor = 4.07, major = 4.47.

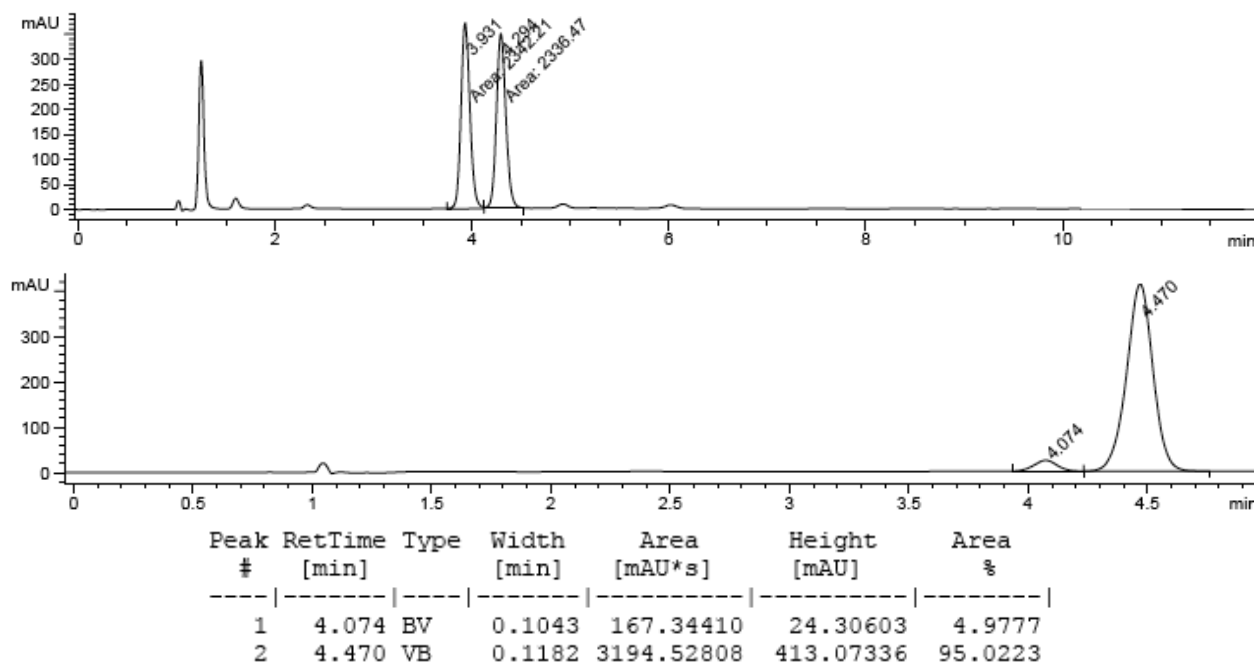

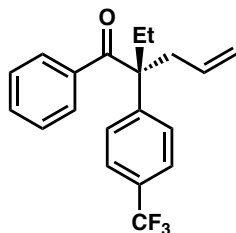

**(*R*)-2-ethyl-1-phenyl-2-(4-(trifluoromethyl)phenyl)pent-4-en-1-one (2s)**

Purified by column chromatography (4% Et<sub>2</sub>O in hexanes) to provide a colorless oil (65.7 mg, 99% yield); 70% ee,  $[\alpha]_D^{25}$   $-57.1$  ( $c$  1.00, CHCl<sub>3</sub>); <sup>1</sup>H NMR (500 MHz, CDCl<sub>3</sub>)  $\delta$  7.63 (m, 2H), 7.45–7.35 (m, 5H), 7.25–7.20 (m, 2H), 5.35 (dddd,  $J$  = 16.8, 10.2, 8.3, 6.5 Hz, 1H), 5.05–4.85 (m, 2H), 3.01–2.71 (m, 2H), 2.19 (q,  $J$  = 7.4 Hz, 2H), 0.71 (t,  $J$  = 7.5 Hz, 3H); <sup>19</sup>F NMR (282 MHz)  $\delta$   $-62.5$  (s); <sup>13</sup>C NMR (126 MHz, CDCl<sub>3</sub>)  $\delta$  202.2, 147.1 (d,  $J$  = 1.4 Hz), 136.6, 132.8, 132.2, 129.5, 129.3 (q,  $J$  = 32.9 Hz), 128.3, 127.3, 125.9 (q,  $J$  = 3.7 Hz), 124.2 (q,  $J$  = 272.1 Hz), 118.9, 58.3, 39.4, 27.1, 8.0; IR (Neat Film, NaCl) 3075, 2975, 2942, 1678, 1641, 1617, 1597, 1579, 1447, 1411, 1328, 1228, 1168, 1127, 1070, 1017, 920, 828, 712, 656 cm<sup>-1</sup>; HRMS (MM:ESI-APCI+)  $m/z$  calc'd for C<sub>20</sub>H<sub>20</sub>F<sub>3</sub>O [M+H]<sup>+</sup>: 333.1461, found 333.1455; SFC Conditions: 5% IPA, 3.0 mL/min, Chiralpak AD-H column (2 columns combined),  $\lambda$  = 210 nm,  $t_R$  (min): minor = 3.59, major = 3.76.

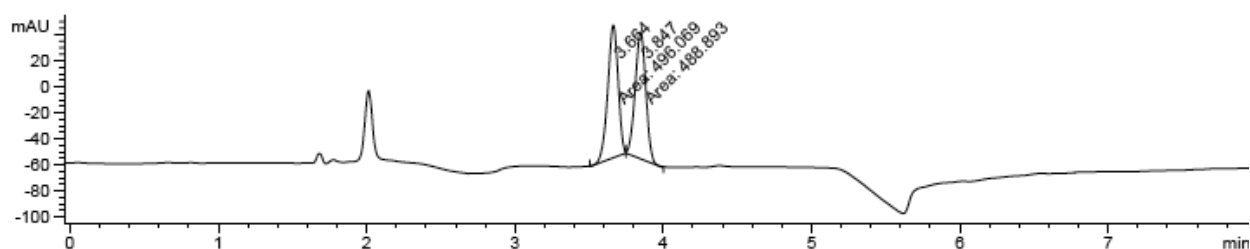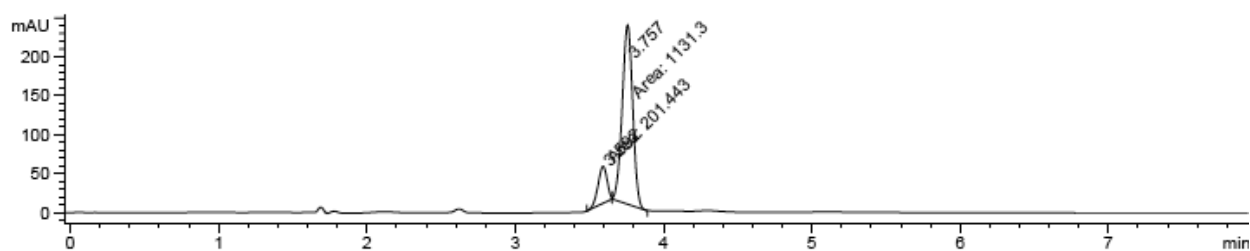

| Peak # | RetTime [min] | Type | Width [min] | Area [mAU*s] | Height [mAU] | Area %  |
|--------|---------------|------|-------------|--------------|--------------|---------|
| 1      | 3.592         | MM   | 0.0701      | 201.44276    | 47.86584     | 15.1149 |
| 2      | 3.757         | MM   | 0.0817      | 1131.30029   | 230.90933    | 84.8851 |

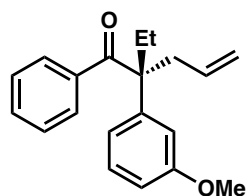

**(*R*)-2-ethyl-2-(3-methoxyphenyl)-1-phenylpent-4-en-1-one (2t)**

Purified by column chromatography (4% Et<sub>2</sub>O in hexanes) to provide a colorless oil (56.1 mg, 95% yield); 90% ee,  $[\alpha]_D^{25}$   $-103.0$  ( $c$  1.00, CHCl<sub>3</sub>); <sup>1</sup>H NMR (500 MHz, CDCl<sub>3</sub>)  $\delta$  7.48–7.42 (m, 2H), 7.39–7.33 (m, 1H), 7.31–7.27 (m, 1H), 7.25–7.17 (m, 2H), 6.90–6.79 (m, 3H), 5.38 (dddd,  $J$  = 16.8, 10.3, 8.0, 6.6 Hz, 1H), 5.02–4.82 (m, 2H), 3.78 (s, 3H), 2.90–2.70 (m, 2H), 2.25–2.04 (m, 2H), 0.68 (t,  $J$  = 7.4 Hz, 3H); <sup>13</sup>C NMR (100 MHz, CDCl<sub>3</sub>)  $\delta$  203.2, 160.1, 144.4, 137.3, 133.6, 131.8, 129.9, 129.4, 128.1, 119.5, 118.2, 113.1, 112.0, 58.1, 55.3, 39.2, 26.9, 8.0; IR (Neat Film, NaCl) 3070, 2971, 2939, 2878, 2835, 1676, 1640, 1598, 1581, 1487, 1462, 1446, 1433, 1292, 1261, 1229, 1168, 1050, 1004, 917, 776, 727, 701 cm<sup>-1</sup>; HRMS (MM:ESI-APCI+)  $m/z$  calc'd for C<sub>20</sub>H<sub>23</sub>O<sub>2</sub> [M+H]<sup>+</sup>: 295.1693, found 295.1683; SFC Conditions: 5% IPA, 3.0 mL/min, Chiralpak AD-H column (2 columns combined),  $\lambda$  = 210 nm,  $t_R$  (min): minor = 7.91, major = 8.48.

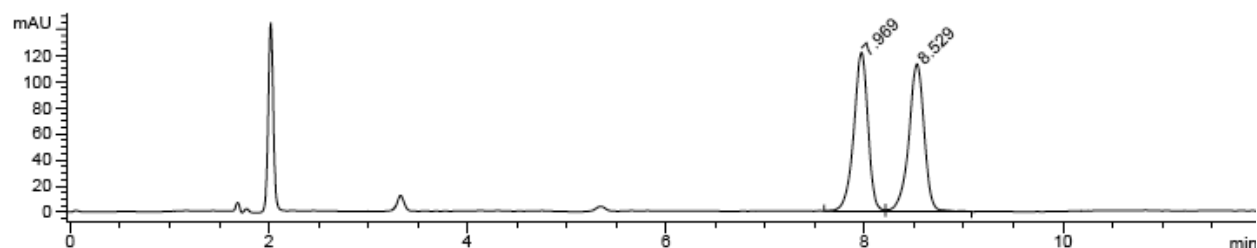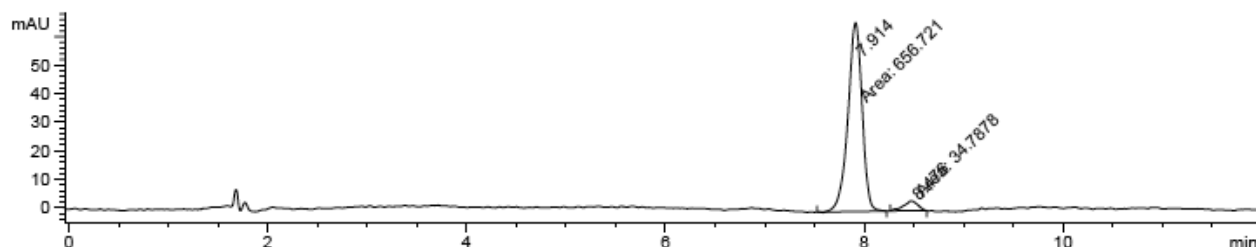

| Peak # | RetTime [min] | Type | Width [min] | Area [mAU*s] | Height [mAU] | Area %  |
|--------|---------------|------|-------------|--------------|--------------|---------|
| 1      | 7.914         | MM   | 0.1651      | 656.72083    | 66.31249     | 94.9693 |
| 2      | 8.476         | MM   | 0.1650      | 34.78777     | 3.51379      | 5.0307  |

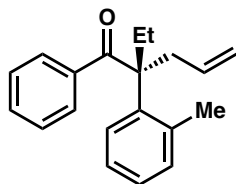

**(*R*)-2-ethyl-1-phenyl-2-(*o*-tolyl)pent-4-en-1-one (2u)**

Purified by column chromatography (4% Et<sub>2</sub>O in hexanes) to provide a colorless oil (55.9 mg, 99% yield); 90% ee,  $[\alpha]_D^{25} -100.6$  (*c* 1.0, CHCl<sub>3</sub>); <sup>1</sup>H NMR (500 MHz, CDCl<sub>3</sub>) δ 7.63–7.58 (m, 2H), 7.51–7.48 (m, 1H), 7.41–7.35 (m, 1H), 7.33–7.28 (m, 1H), 7.22–7.16 (m, 3H), 7.07–7.02 (m, 1H), 5.34 (ddt, *J* = 17.5, 10.3, 7.4 Hz, 1H), 5.06–4.84 (m, 2H), 2.93–2.86 (m, 2H), 2.28 (dt, *J* = 14.8, 7.4 Hz, 1H), 2.14 (dt, *J* = 13.9, 7.3 Hz, 1H), 2.09 (s, 3H), 0.69 (t, *J* = 7.4 Hz, 3H); <sup>13</sup>C NMR (100 MHz, CDCl<sub>3</sub>) δ 203.1, 141.4, 136.7, 133.9, 132.7, 132.3, 129.1, 128.1, 127.1, 126.6, 126.4, 118.2, 57.9, 37.3, 26.6, 21.1, 8.1; IR (Neat Film, NaCl) 3068, 2975, 2879, 1674, 1639, 1596, 1578, 1487, 1446, 1384, 1225, 1181, 1136, 1059, 1004, 915, 841, 760, 733, 710, 692 cm<sup>-1</sup>; HRMS (MM:ESI-APCI+) *m/z* calc'd for C<sub>20</sub>H<sub>23</sub>O [M+H]<sup>+</sup>: 279.1743, found 279.1736; SFC Conditions: 5% IPA, 3.5 mL/min, Chiralpak AD-H column, λ = 210 nm, *t*<sub>R</sub> (min): minor = 3.76, major = 4.05.

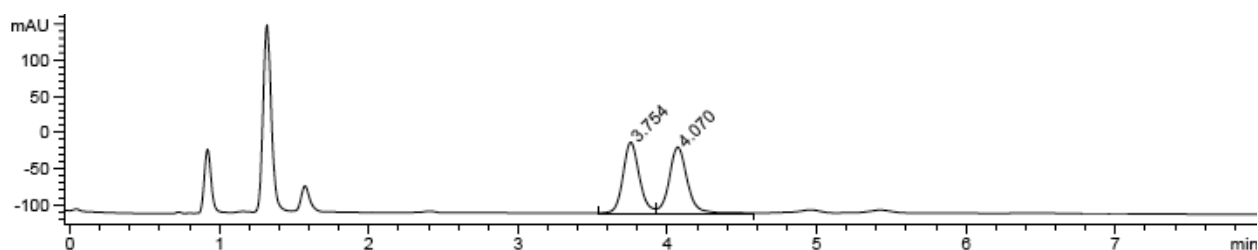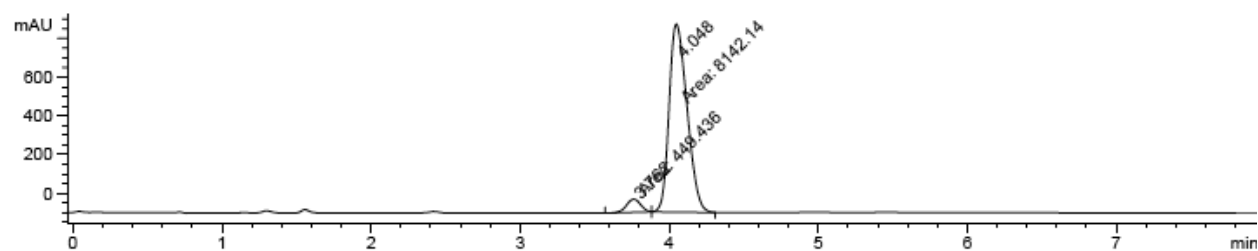

| Peak # | RetTime [min] | Type | Width [min] | Area [mAU*s] | Height [mAU] | Area %  |
|--------|---------------|------|-------------|--------------|--------------|---------|
| 1      | 3.762         | MM   | 0.1098      | 449.43604    | 68.19579     | 5.2311  |
| 2      | 4.048         | MM   | 0.1396      | 8142.14111   | 972.34613    | 94.7689 |

## General Procedure for Preparation of Allyl Enol Carbonate Substrates

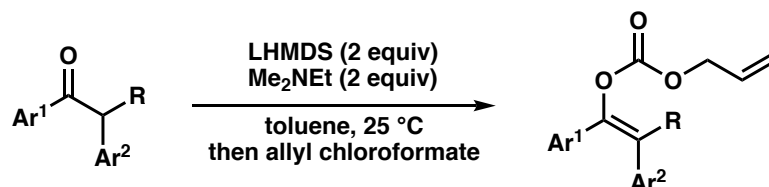

To a flame-dried flask was added LHMDS (335 mg, 2 mmol) followed by toluene (3.0 mL) and N,N-dimethylethylamine (0.213 mL), and the resulting mixture stirred at 25 °C for 5 minutes. A solution of ketone (1 mmol) in toluene (2.0 mL) was then added, and the reaction stirred at 25 °C for an additional 30 minutes. The flask was then submerged in a room temperature water bath, and allyl chloroformate (0.217 mL, 2 mmol) was added neat, and the reaction continued until no starting material remained by TLC (typically less than 30 minutes). The crude reaction mixture was diluted with Et<sub>2</sub>O and quenched with water. The layers were separated, and the aqueous layer was extracted with Et<sub>2</sub>O twice. The combined organic layers were dried over Na<sub>2</sub>SO<sub>4</sub> and concentrated. The crude product was purified by silica gel flash chromatography to afford the desired enol carbonate. The *E/Z* ratio of enol carbonates was determined by <sup>1</sup>H NMR and is >95:5 unless stated otherwise.

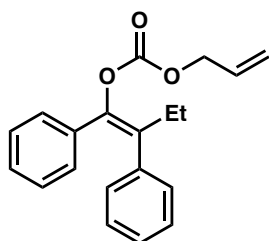**(*E*)-allyl (1,2-diphenylbut-1-en-1-yl) carbonate (1a)**

Run on 2.0 mmol scale. Purified by column chromatography (8% Et<sub>2</sub>O in hexanes) to provide a colorless oil (586.3 mg, 95% yield); <sup>1</sup>H NMR (500 MHz, CDCl<sub>3</sub>) δ 7.23–7.17 (m, 3H), 7.14–7.10 (m, 7H), 5.93 (ddt, *J* = 17.2, 10.5, 5.7 Hz, 1H), 5.40–5.22 (m, 2H), 4.64 (dt, *J* = 5.7, 1.4 Hz, 2H), 2.58 (q, *J* = 7.5 Hz, 2H), 0.99 (t, *J* = 7.5 Hz, 3H); <sup>13</sup>C NMR (100 MHz, CDCl<sub>3</sub>) δ 153.2, 142.9, 138.9, 135.1, 133.3, 131.3, 129.5, 128.9, 128.2, 127.8, 127.8, 127.0, 119.0, 68.9, 26.0,

12.2; IR (Neat Film, NaCl) 3083, 3057, 2972, 2936, 2875, 1756, 1651, 1600, 1577, 1493, 1445, 1364, 1257, 1220, 1122, 1091, 1075, 1044, 988, 858, 766, 697  $\text{cm}^{-1}$ ; HRMS (MM:ESI-APCI+)  $m/z$  calc'd for  $\text{C}_{20}\text{H}_{24}\text{NO}_3$   $[\text{M}+\text{NH}_4]^+$ : 326.1751, found 326.1756.

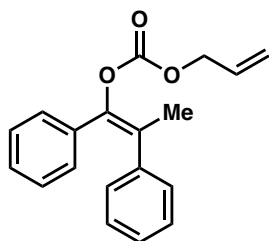

**(*E*)-allyl (1,2-diphenylprop-1-en-1-yl) carbonate (1b)**

Purified by column chromatography (5%  $\text{Et}_2\text{O}$  in hexanes) to provide a colorless oil (210.3 mg, 71% yield, 81:17 *E/Z* ratio);  $^1\text{H}$  NMR major isomer (300 MHz,  $\text{CDCl}_3$ )  $\delta$  7.46–7.34 (m, 1H), 7.23–7.17 (m, 2H), 7.17–7.09 (m, 7H), 5.94 (ddt,  $J$  = 17.2, 10.4, 5.7 Hz, 1H), 5.44–5.23 (m, 2H), 4.65 (dt,  $J$  = 5.7, 1.4 Hz, 2H), 2.16 (s, 3H);  $^{13}\text{C}$  NMR major isomer (100 MHz,  $\text{CDCl}_3$ )  $\delta$  153.1, 143.6, 140.4, 135.1, 131.4, 129.1, 128.6, 128.4, 128.0, 127.4, 127.3, 127.2, 119.2, 69.0, 19.2; IR (Neat Film, NaCl) 3082, 3057, 3024, 2992, 2947, 1759, 1493, 1444, 1381, 1364, 1229, 1122, 1030, 966, 777, 765, 698  $\text{cm}^{-1}$ ; HRMS (MM:ESI-APCI+)  $m/z$  calc'd for  $\text{C}_{19}\text{H}_{22}\text{NO}_3$   $[\text{M}+\text{NH}_4]^+$ : 312.1594, found 312.1583.

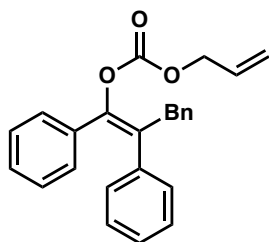

**(*E*)-allyl (1,2,3-triphenylprop-1-en-1-yl) carbonate (1c)**

Purified by column chromatography (4%  $\text{Et}_2\text{O}$  in hexanes) to provide a colorless oil (305.8 mg, 83% yield);  $^1\text{H}$  NMR (500 MHz,  $\text{CDCl}_3$ )  $\delta$  7.25–7.09 (m, 13H), 7.04–6.98 (m, 2H), 5.90 (ddt,  $J$  = 17.2, 10.5, 5.7 Hz, 1H), 5.46–5.15 (m, 2H), 4.61 (dt,  $J$  = 5.8, 1.4 Hz, 2H), 3.91 (s, 2H);  $^{13}\text{C}$  NMR (100 MHz,  $\text{CDCl}_3$ )  $\delta$  153.2, 144.4, 138.8, 138.6, 134.9, 131.3, 130.3, 129.7, 129.1, 128.4, 128.2, 128.1, 128.0, 127.2, 126.2, 119.3, 69.1, 39.1; IR (Neat Film, NaCl) 3027, 1760, 1601, 1495, 1444, 1364, 1227, 1118, 1030, 971, 776, 698  $\text{cm}^{-1}$ ; HRMS (MM:ESI-APCI+)  $m/z$  calc'd for  $\text{C}_{25}\text{H}_{26}\text{NO}_3$   $[\text{M}+\text{NH}_4]^+$ : 388.1907, found 388.1898.

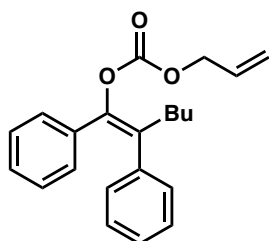

**(*E*)-allyl (1,2-diphenylhex-1-en-1-yl) carbonate (1d)**

Purified by column chromatography (5% Et<sub>2</sub>O in hexanes) to provide a colorless oil (301.3 mg, 90% yield); <sup>1</sup>H NMR (400 MHz, CDCl<sub>3</sub>) δ 7.23–7.16 (m, 3H), 7.15–7.09 (m, 7H), 5.92 (ddt, *J* = 17.2, 10.4, 5.7 Hz, 1H), 5.40–5.23 (m, 2H), 4.64 (dt, *J* = 5.7, 1.4 Hz, 2H), 2.59–2.47 (m, 2H), 1.38–1.28 (m, 4H), 0.98–0.83 (m, 3H); <sup>13</sup>C NMR (100 MHz, CDCl<sub>3</sub>) δ 153.3, 143.4, 139.2, 135.2, 132.2, 131.4, 129.5, 129.0, 128.3, 127.9, 127.8, 127.1, 119.1, 69.0, 32.6, 29.6, 22.7, 14.0; IR (Neat Film, NaCl) 3082, 3057, 3024, 2957, 2930, 2861, 1760, 1493, 1444, 1380, 1364, 1292, 1240, 1227, 1207, 1122, 1000, 964, 772, 698 cm<sup>-1</sup>; HRMS (MM:ESI-APCI+) *m/z* calc'd for C<sub>22</sub>H<sub>28</sub>NO<sub>3</sub> [M+NH<sub>4</sub>]<sup>+</sup>: 354.2064, found 354.2047.

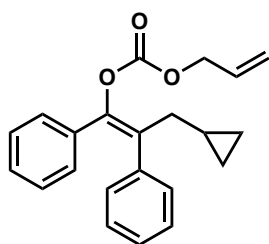

**(*E*)-allyl (3-cyclopropyl-1,2-diphenylprop-1-en-1-yl) carbonate (1e)**

Purified by column chromatography (5% Et<sub>2</sub>O in hexanes) to provide a colorless oil (299.4 mg, 90% yield); <sup>1</sup>H NMR (500 MHz, CDCl<sub>3</sub>) δ 7.24–7.09 (m, 10H), 5.92 (ddt, *J* = 17.2, 10.4, 5.7 Hz, 1H), 5.39–5.22 (m, 2H), 4.63 (dt, *J* = 5.7, 1.4 Hz, 2H), 2.47 (d, *J* = 6.9 Hz, 2H), 0.78–0.67 (m, 1H), 0.41–0.31 (m, 2H), 0.13 – -0.03 (m, 2H); <sup>13</sup>C NMR (100 MHz, CDCl<sub>3</sub>) δ 153.3, 143.3, 139.6, 135.1, 131.9, 131.4, 129.6, 129.0, 128.2, 127.9, 127.0, 119.2, 69.0, 37.5, 9.6, 4.7; IR (Neat Film, NaCl) 3079, 3003, 2950, 1760, 1491, 1444, 1364, 1292, 1247, 1222, 1127, 1056, 1018, 972, 936, 826, 771, 698 cm<sup>-1</sup>; HRMS (MM:ESI-APCI+) *m/z* calc'd for C<sub>22</sub>H<sub>26</sub>NO<sub>3</sub> [M+NH<sub>4</sub>]<sup>+</sup>: 352.1907, found 352.1903.

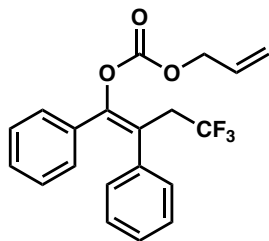

**(*E*)-allyl (4,4,4-trifluoro-1,2-diphenylbut-1-en-1-yl) carbonate (1f)**

Purified by column chromatography (5% Et<sub>2</sub>O in hexanes) to provide a colorless oil (299.0 mg, 82% yield); <sup>1</sup>H NMR (400 MHz, CDCl<sub>3</sub>) δ 7.24–7.19 (m, 3H), 7.19–7.11 (m, 7H), 5.90 (ddt, *J* = 17.2, 10.4, 5.8 Hz, 1H), 5.44–5.21 (m, 2H), 4.62 (dt, *J* = 5.8, 1.4 Hz, 2H), 3.40 (q, *J* = 10.3 Hz, 2H); <sup>19</sup>F NMR (282 MHz, CDCl<sub>3</sub>) δ –63.1 (t, *J* = 10.4 Hz); <sup>13</sup>C NMR (100 MHz, CDCl<sub>3</sub>) δ 152.5, 148.5, 137.7, 134.1, 131.0, 129.6, 129.1, 128.8, 128.6, 128.1, 127.8, 125.7 (q, *J* = 278.5 Hz), 120.6 (q, *J* = 2.6 Hz), 119.6, 69.4, 37.3 (q, *J* = 30.0 Hz); IR (Neat Film, NaCl) 3085, 3059, 3026, 1764, 1651, 1494, 1446, 1258, 1224, 1136, 1110, 1056, 972, 956, 940, 777, 700 cm<sup>–1</sup>; HRMS (MM:ESI-APCI+) *m/z* calc'd for C<sub>20</sub>H<sub>21</sub>F<sub>3</sub>NO<sub>3</sub> [M+NH<sub>4</sub>]<sup>+</sup>: 380.1468, found 380.1455.

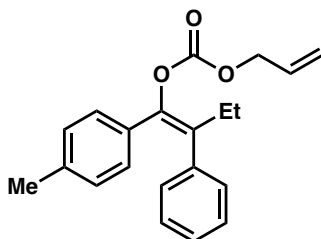

**(*E*)-allyl (2-phenyl-1-(*p*-tolyl)but-1-en-1-yl) carbonate (1g)**

Purified by column chromatography (4% Et<sub>2</sub>O in hexanes) to provide a colorless oil (291.6 mg, 90% yield); <sup>1</sup>H NMR (300 MHz, CDCl<sub>3</sub>) δ 7.25–7.17 (m, 3H), 7.16–7.10 (m, 2H), 7.04–6.98 (m, 2H), 6.96–6.89 (m, 2H), 5.93 (ddt, *J* = 17.2, 10.4, 5.7 Hz, 1H), 5.42–5.23 (m, 2H), 4.64 (dt, *J* = 5.7, 1.4 Hz, 2H), 2.56 (q, *J* = 7.5 Hz, 2H), 2.23 (s, 3H), 0.97 (t, *J* = 7.5 Hz, 3H); <sup>13</sup>C NMR (100 MHz, CDCl<sub>3</sub>) δ 153.4, 143.1, 139.2, 137.7, 132.7, 132.2, 131.5, 129.6, 128.8, 128.7, 128.3, 127.0, 119.2, 69.0, 26.1, 21.4, 12.3; IR (Neat Film, NaCl) 3082, 3055, 3026, 2972, 2875, 1760, 1650, 1511, 1491, 1443, 1308, 1291, 1258, 1226, 1184, 1122, 1089, 1045, 988, 946, 929, 862, 826, 784, 768, 701 cm<sup>–1</sup>; HRMS (MM:ESI-APCI+) *m/z* calc'd for C<sub>21</sub>H<sub>26</sub>NO<sub>3</sub> [M+NH<sub>4</sub>]<sup>+</sup>: 340.1907, found 340.1896.

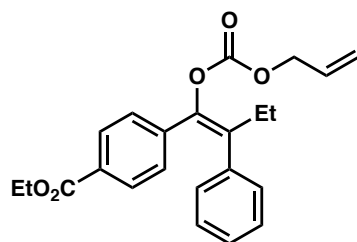

**ethyl (*E*)-4-(1-(((allyloxy)carbonyl)oxy)-2-phenylbut-1-en-1-yl)benzoate (1h)**

Purified by column chromatography (8% Et<sub>2</sub>O in hexanes) to provide a colorless oil (291.2 mg, 77% yield); <sup>1</sup>H NMR (300 MHz, CDCl<sub>3</sub>) δ 7.82–7.74 (m, 2H), 7.25–7.15 (m, 5H), 7.14–7.05 (m, 2H), 5.92 (ddt, *J* = 17.2, 10.4, 5.8 Hz, 1H), 5.48–5.20 (m, 2H), 4.64 (dt, *J* = 5.8, 1.4 Hz, 2H), 4.31 (q, *J* = 7.1 Hz, 2H), 2.59 (q, *J* = 7.5 Hz, 2H), 1.33 (t, *J* = 7.1 Hz, 3H), 0.98 (t, *J* = 7.5 Hz, 3H); <sup>13</sup>C NMR (100 MHz, CDCl<sub>3</sub>) δ 166.3, 153.2, 142.0, 139.7, 138.5, 135.4, 131.2, 129.5, 129.4, 129.2, 128.8, 128.5, 127.5, 119.4, 69.2, 61.0, 26.3, 14.4, 12.2; IR (Neat Film, NaCl) 3081, 3057, 2978, 2937, 2876, 1761, 1718, 1609, 1444, 1407, 1366, 1276, 1224, 1180, 1125, 1108, 1045, 1022, 990, 947, 860, 769, 702 cm<sup>-1</sup>; HRMS (MM:ESI-APCI+) *m/z* calc'd for C<sub>23</sub>H<sub>28</sub>NO<sub>5</sub> [M+NH<sub>4</sub>]<sup>+</sup>: 398.1962, found 398.1952.

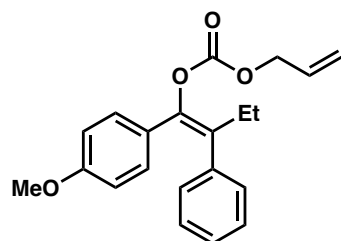

**(*E*)-allyl (1-(4-methoxyphenyl)-2-phenylbut-1-en-1-yl) carbonate (1i)**

Purified by column chromatography (5% Et<sub>2</sub>O in hexanes) to provide a colorless oil (254.3 mg, 75% yield); <sup>1</sup>H NMR (300 MHz, CDCl<sub>3</sub>) δ 7.25–7.16 (m, 3H), 7.16–7.10 (m, 2H), 7.09–7.01 (m, 2H), 6.72–6.58 (m, 2H), 5.94 (ddt, *J* = 17.3, 10.5, 5.7 Hz, 1H), 5.49–5.20 (m, 2H), 4.64 (dt, *J* = 5.7, 1.4 Hz, 2H), 3.72 (s, 3H), 2.55 (q, *J* = 7.5 Hz, 2H), 0.97 (t, *J* = 7.5 Hz, 3H); <sup>13</sup>C NMR (100 MHz, CDCl<sub>3</sub>) δ 159.0, 153.4, 142.9, 139.2, 132.1, 131.5, 130.3, 129.6, 128.3, 127.6, 127.0, 119.2, 113.3, 69.0, 55.2, 26.0, 12.3; IR (Neat Film, NaCl) 2970, 2936, 1760, 1651, 1609, 1576, 1511, 1462, 1443, 1364, 1294, 1252, 1226, 1176, 1123, 1044, 1014, 988, 946, 862, 836, 784, 767, 701 cm<sup>-1</sup>; HRMS (MM:ESI-APCI+) *m/z* calc'd for C<sub>21</sub>H<sub>26</sub>NO<sub>4</sub> [M+NH<sub>4</sub>]<sup>+</sup>: 356.1856, found 356.1845.

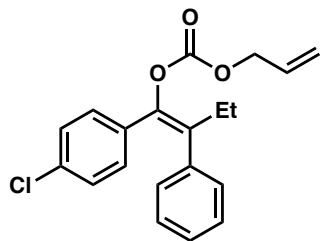

**(*E*)-allyl (1-(4-chlorophenyl)-2-phenylbut-1-en-1-yl) carbonate (1j)**

Purified by column chromatography (5% Et<sub>2</sub>O in hexanes) to provide a colorless oil (310.0 mg, 90% yield); <sup>1</sup>H NMR (300 MHz, CDCl<sub>3</sub>) δ 7.22 (dd, *J* = 5.3, 1.9 Hz, 3H), 7.14–7.00 (m, 6H), 6.04–5.82 (m, 1H), 5.45–5.24 (m, 2H), 4.64 (dd, *J* = 5.7, 1.5 Hz, 2H), 2.56 (q, *J* = 7.5 Hz, 2H), 0.97 (t, *J* = 7.5 Hz, 3H); <sup>13</sup>C NMR (100 MHz, CDCl<sub>3</sub>) δ 153.3, 141.9, 138.6, 134.2, 133.7, 133.6, 131.3, 130.3, 129.5, 128.5, 128.2, 127.4, 119.4, 69.2, 26.1, 12.2; IR (Neat Film, NaCl) 3081, 3057, 2972, 2936, 2875, 1760, 1649, 1594, 1490, 1443, 1364, 1292, 1275, 1257, 1224, 1180, 1123, 1092, 1045, 1015, 989, 946, 930, 860, 835, 768, 701 cm<sup>-1</sup>; HRMS (MM:ESI-APCI+) *m/z* calc'd for C<sub>20</sub>H<sub>23</sub>ClNO<sub>3</sub> [M+NH<sub>4</sub>]<sup>+</sup>: 360.1361, found 360.1372.

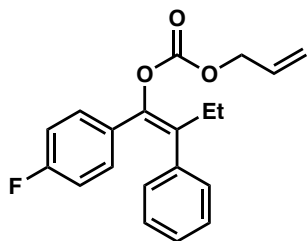

**(*E*)-allyl (1-(4-fluorophenyl)-2-phenylbut-1-en-1-yl) carbonate (1k)**

Purified by column chromatography (5% Et<sub>2</sub>O in hexanes) to provide a colorless oil which solidifies in a freezer (303.7 mg, 93% yield); <sup>1</sup>H NMR (500 MHz, CDCl<sub>3</sub>) δ 7.25–7.18 (m, 3H), 7.10 (ddq, *J* = 5.3, 4.6, 2.9 Hz, 4H), 6.85–6.74 (m, 2H), 5.93 (ddt, *J* = 17.2, 10.4, 5.7 Hz, 1H), 5.50–5.14 (m, 2H), 4.64 (dt, *J* = 5.7, 1.4 Hz, 2H), 2.56 (q, *J* = 7.5 Hz, 2H), 0.97 (t, *J* = 7.5 Hz, 3H); <sup>19</sup>F NMR (282 MHz) δ –113.3 (m); <sup>13</sup>C NMR (100 MHz, CDCl<sub>3</sub>) δ 162.1 (d, *J* = 248.1 Hz), 153.3, 142.1, 138.8, 133.6, 131.3, 131.3, 130.9 (d, *J* = 8.3 Hz), 129.5, 128.4, 127.2, 119.3, 115.0 (d, *J* = 21.6 Hz), 69.1, 26.0, 12.2; IR (Neat Film, NaCl) 3081, 3058, 3024, 2973, 2937, 2876, 1760, 1651, 1605, 1444, 1364, 1292, 1259, 1225, 1159, 1122, 1096, 1045, 989, 946, 930, 864, 842, 809, 785, 767, 701 cm<sup>-1</sup>; HRMS (MM:ESI-APCI+) *m/z* calc'd for C<sub>20</sub>H<sub>23</sub>FNO<sub>3</sub> [M+NH<sub>4</sub>]<sup>+</sup>: 344.1656, found 344.1659.

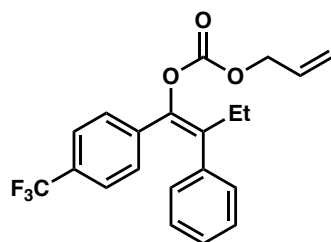

**(*E*)-allyl (2-phenyl-1-(4-(trifluoromethyl)phenyl)but-1-en-1-yl) carbonate (1l)**

Purified by column chromatography (5% Et<sub>2</sub>O in hexanes) to provide a colorless oil which solidifies in a freezer (354.0 mg, 94% yield); <sup>1</sup>H NMR (300 MHz, CDCl<sub>3</sub>) δ 7.40–7.33 (m, 2H), 7.25–7.19 (m, 5H), 7.15–7.06 (m, 2H), 5.93 (ddt, *J* = 17.2, 10.4, 5.8 Hz, 1H), 5.48–5.15 (m, 2H), 4.65 (dt, *J* = 5.8, 1.4 Hz, 2H), 2.59 (q, *J* = 7.5 Hz, 2H), 0.98 (t, *J* = 7.5 Hz, 3H); <sup>19</sup>F NMR (282 MHz) δ –62.8 (s); <sup>13</sup>C NMR (100 MHz, CDCl<sub>3</sub>) δ 153.3, 141.6, 138.8, 138.3, 135.6, 131.2, 129.6 (q, *J* = 32.4 Hz), 129.4, 129.1, 128.6, 127.6, 124.9 (q, *J* = 3.8 Hz), 124.1 (q, *J* = 271.6 Hz), 119.5, 69.3, 26.3, 12.1; IR (Neat Film, NaCl) 3083, 2059, 3025, 2975, 2938, 2878, 1760, 1651, 1618, 1577, 1492, 1444, 1408, 1365, 1327, 1292, 1260, 1226, 1168, 1127, 1068, 1046, 1018, 989, 946, 931, 847, 782, 769, 702, 613 cm<sup>–1</sup>; HRMS (MM:ESI-APCI+) *m/z* calc'd for C<sub>21</sub>H<sub>23</sub>F<sub>3</sub>NO<sub>3</sub> [M+NH<sub>4</sub>]<sup>+</sup>: 394.1625, found 394.1608

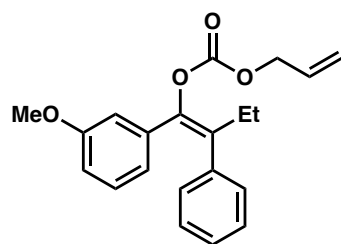

**(*E*)-allyl (1-(3-methoxyphenyl)-2-phenylbut-1-en-1-yl) carbonate (1m)**

Purified by column chromatography (10% Et<sub>2</sub>O in hexanes) to provide a colorless oil (320.2 mg, 95% yield); <sup>1</sup>H NMR (300 MHz, CDCl<sub>3</sub>) δ 7.25–7.18 (m, 3H), 7.17–7.11 (m, 2H), 7.04 (ddd, *J* = 8.2, 7.7, 0.4 Hz, 1H), 6.78–6.59 (m, 3H), 5.94 (ddt, *J* = 17.2, 10.4, 5.7 Hz, 1H), 5.47–5.20 (m, 2H), 4.65 (dt, *J* = 5.7, 1.4 Hz, 2H), 3.51 (s, 3H), 2.56 (q, *J* = 7.5 Hz, 2H), 0.98 (t, *J* = 7.5 Hz, 3H); <sup>13</sup>C NMR (100 MHz, CDCl<sub>3</sub>) δ 158.9, 153.4, 142.8, 139.1, 136.3, 133.5, 131.4, 129.5, 128.9, 128.4, 127.2, 121.1, 119.2, 114.5, 114.0, 69.1, 55.1, 26.2, 12.2; IR (Neat Film, NaCl) 2970, 2937, 1760, 1600, 1580, 1486, 1464, 1454, 1444, 1428, 1364, 1323, 1288, 1234, 1204, 1178, 1120, 1043, 994, 948, 892, 863, 784, 769, 701 cm<sup>–1</sup>; HRMS (MM:ESI-APCI+) *m/z* calc'd for C<sub>21</sub>H<sub>26</sub>NO<sub>4</sub> [M+NH<sub>4</sub>]<sup>+</sup>: 356.1856, found 356.1844

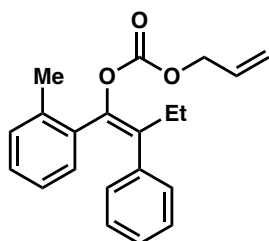

**(*E*)-allyl (2-phenyl-1-(*o*-tolyl)but-1-en-1-yl) carbonate (1n)**

Purified by column chromatography (5% Et<sub>2</sub>O in hexanes) to provide a colorless oil (299.3 mg, 93% yield, 80:20 *E/Z* ratio); <sup>1</sup>H NMR major isomer (300 MHz, CDCl<sub>3</sub>) δ 7.41–7.28 (m, 1H), 7.21 (dd, *J* = 7.6, 1.6 Hz, 1H), 7.16–7.06 (m, 4H), 7.04 – 6.97 (m, 3H), 5.91 (ddt, *J* = 17.2, 10.4, 5.8 Hz, 1H), 5.41 – 5.22 (m, 2H), 4.60 (dt, *J* = 5.8, 1.4 Hz, 2H), 2.62 (q, *J* = 7.5 Hz, 2H), 2.18 (s, 3H), 1.02 (t, *J* = 7.5 Hz, 3H); <sup>13</sup>C NMR major isomer (100 MHz, CDCl<sub>3</sub>) δ 153.1, 142.9, 138.5, 137.5, 134.4, 134.3, 131.5, 131.5, 130.0, 129.0, 128.5, 127.9, 126.9, 125.2, 119.2, 68.9, 25.1, 20.0, 12.9; IR (Neat Film, NaCl) 3022, 2971, 1758, 1493, 1457, 1443, 1380, 1364, 1292, 1258, 1225, 1131, 1044, 988, 946, 862, 769, 700 cm<sup>-1</sup>; HRMS (MM:ESI-APCI+) *m/z* calc'd for C<sub>21</sub>H<sub>26</sub>NO<sub>3</sub> [M+NH<sub>4</sub>]<sup>+</sup>: 340.1907, found 340.1892.

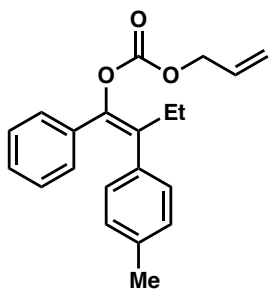

**(*E*)-allyl (1-phenyl-2-(*p*-tolyl)but-1-en-1-yl) carbonate (1o)**

Purified by column chromatography (5% Et<sub>2</sub>O in hexanes) to provide a colorless oil (295.7 mg, 92% yield); <sup>1</sup>H NMR (500 MHz, CDCl<sub>3</sub>) δ 7.15 – 7.11 (m, 5H), 7.03–6.99 (m, 4H), 5.93 (ddt, *J* = 17.2, 10.4, 5.7 Hz, 1H), 5.41–5.24 (m, 2H), 4.64 (dt, *J* = 5.7, 1.4 Hz, 2H), 2.56 (q, *J* = 7.5 Hz, 2H), 2.30 (s, 3H), 0.98 (t, *J* = 7.5 Hz, 3H); <sup>13</sup>C NMR (126 MHz, CDCl<sub>3</sub>) δ 153.4, 142.7, 136.8, 135.9, 135.3, 133.3, 131.4, 129.4, 129.1, 129.0, 127.9, 127.8, 119.2, 69.0, 26.1, 21.3, 12.3; IR (Neat Film, NaCl) 3024, 2971, 2935, 2874, 1760, 1512, 1292, 1445, 1364, 1291, 1258, 1224,

1122, 1044, 988, 946, 928, 818, 778, 697  $\text{cm}^{-1}$ ; HRMS (MM:ESI-APCI+)  $m/z$  calc'd for  $\text{C}_{21}\text{H}_{23}\text{O}_3$   $[\text{M}+\text{H}]^+$ : 323.1642, found 323.1630.

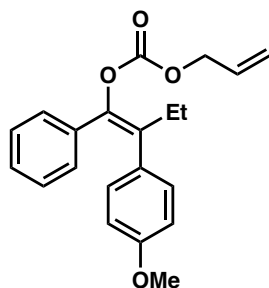

**(*E*)-allyl (2-(4-methoxyphenyl)-1-phenylbut-1-en-1-yl) carbonate (1p)**

Purified by column chromatography (8%  $\text{Et}_2\text{O}$  in hexanes) to provide a colorless oil (295.0 mg, 87% yield);  $^1\text{H}$  NMR (500 MHz,  $\text{CDCl}_3$ )  $\delta$  7.16–7.11 (m, 5H), 7.07–7.00 (m, 2H), 6.78–6.71 (m, 2H), 5.93 (ddt,  $J$  = 17.2, 10.5, 5.7 Hz, 1H), 5.40–5.23 (m, 2H), 4.64 (dt,  $J$  = 5.7, 1.4 Hz, 2H), 3.77 (s, 3H), 2.55 (q,  $J$  = 7.5 Hz, 2H), 0.98 (t,  $J$  = 7.5 Hz, 3H);  $^{13}\text{C}$  NMR (100 MHz,  $\text{CDCl}_3$ )  $\delta$  158.7, 153.4, 142.6, 135.4, 132.9, 131.4, 131.1, 130.7, 129.0, 127.9, 127.7, 119.2, 113.8, 69.0, 55.3, 26.1, 12.3; IR (Neat Film, NaCl) 2970, 1758, 1650, 1608, 1574, 1511, 1493, 1462, 1444, 1364, 1289, 1245, 1223, 1177, 1122, 1044, 987, 831, 778, 698  $\text{cm}^{-1}$ ; HRMS (MM:ESI-APCI+)  $m/z$  calc'd for  $\text{C}_{21}\text{H}_{23}\text{O}_4$   $[\text{M}+\text{H}]^+$ : 339.1591, found 339.1574.

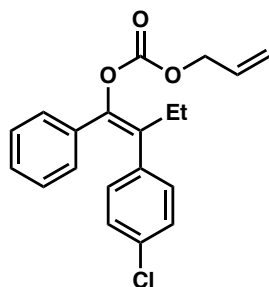

**(*E*)-allyl (2-(4-chlorophenyl)-1-phenylbut-1-en-1-yl) carbonate (1q)**

Purified by column chromatography (8%  $\text{Et}_2\text{O}$  in hexanes) to provide a colorless oil which solidifies in a freezer (315.0 mg, 92% yield);  $^1\text{H}$  NMR (500 MHz,  $\text{CDCl}_3$ )  $\delta$  7.20–7.10 (m, 7H), 7.07–7.02 (m, 2H), 5.92 (ddt,  $J$  = 17.2, 10.4, 5.7 Hz, 1H), 5.46–5.19 (m, 2H), 4.64 (dt,  $J$  = 5.7, 1.4 Hz, 2H), 2.56 (q,  $J$  = 7.5 Hz, 2H), 0.97 (t,  $J$  = 7.5 Hz, 3H);  $^{13}\text{C}$  NMR (100 MHz,  $\text{CDCl}_3$ )  $\delta$  153.2, 143.5, 137.5, 134.8, 133.0, 132.2, 131.3, 131.0, 129.1, 128.6, 128.1, 128.1, 119.3, 69.1,

25.9, 12.2; IR (Neat Film, NaCl) 2973, 2936, 1760, 1490, 1445, 1364, 1292, 1256, 1224, 1123, 1090, 1043, 988, 947, 928, 861, 828, 774, 697  $\text{cm}^{-1}$ ; HRMS (MM:ESI-APCI+)  $m/z$  calc'd for  $\text{C}_{20}\text{H}_{20}\text{ClO}_3$   $[\text{M}+\text{H}]^+$ : 343.1095, found 343.1087.

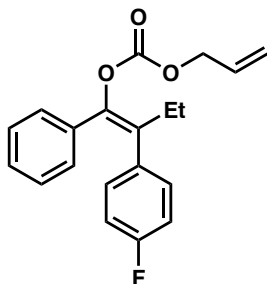

**(*E*)-allyl (2-(4-fluorophenyl)-1-phenylbut-1-en-1-yl) carbonate (1r)**

Purified by column chromatography (6%  $\text{Et}_2\text{O}$  in hexanes) to provide a colorless oil (305.7 mg, 94% yield);  $^1\text{H}$  NMR (500 MHz,  $\text{CDCl}_3$ )  $\delta$  7.16–7.10 (m, 5H), 7.10–7.05 (m, 2H), 6.93–6.85 (m, 2H), 5.92 (ddt,  $J = 17.2, 10.4, 5.7$  Hz, 1H), 5.46–5.16 (m, 2H), 4.64 (dt,  $J = 5.7, 1.4$  Hz, 2H), 2.56 (q,  $J = 7.5$  Hz, 2H), 0.98 (t,  $J = 7.5$  Hz, 3H);  $^{19}\text{F}$  NMR (282 MHz,  $\text{CDCl}_3$ )  $\delta$  –115.1 (tt,  $J = 8.8, 5.5$  Hz);  $^{13}\text{C}$  NMR (100 MHz,  $\text{CDCl}_3$ )  $\delta$  162.0 (d,  $J = 246.2$  Hz), 153.3, 143.3, 135.0, 134.8 (d,  $J = 3.4$  Hz), 132.4, 131.4, 131.2 (d,  $J = 7.9$  Hz), 129.0, 128.0, 119.3, 115.4 (d,  $J = 21.4$  Hz), 69.1, 26.0, 12.2; IR (Neat Film, NaCl) 2973, 2936, 1759, 1602, 1508, 1445, 1364, 1292, 1259, 1222, 1158, 1122, 1043, 988, 945, 835, 767, 698  $\text{cm}^{-1}$ ; HRMS (MM:ESI-APCI+)  $m/z$  calc'd for  $\text{C}_{20}\text{H}_{20}\text{FO}_3$   $[\text{M}+\text{H}]^+$ : 327.1391, found 327.1396.

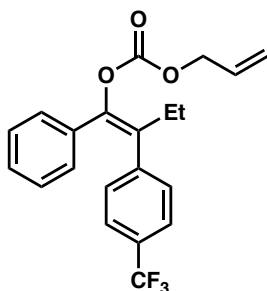

**(*E*)-allyl (1-phenyl-2-(4-(trifluoromethyl)phenyl)but-1-en-1-yl) carbonate (1s)**

Purified by column chromatography (8%  $\text{Et}_2\text{O}$  in hexanes) to provide a white solid (359.9 mg, 96% yield);  $^1\text{H}$  NMR (500 MHz,  $\text{CDCl}_3$ )  $\delta$  7.49–7.44 (m, 2H), 7.25–7.22 (m, 2H), 7.19–7.08 (m, 5H), 5.93 (ddt,  $J = 17.2, 10.4, 5.8$  Hz, 1H), 5.49–5.22 (m, 2H), 4.65 (dt,  $J = 5.7, 1.4$  Hz, 2H), 2.60 (q,  $J = 7.5$  Hz, 2H), 0.99 (t,  $J = 7.5$  Hz, 3H);  $^{19}\text{F}$  NMR (282 MHz,  $\text{CDCl}_3$ )  $\delta$  –62.5 (s);  $^{13}\text{C}$  NMR (100 MHz,  $\text{CDCl}_3$ )  $\delta$  153.1, 144.0, 143.0 (d,  $J = 1.6$  Hz), 134.6, 132.2, 131.3, 130.0, 129.2

(q,  $J = 32.2$  Hz), 129.1, 128.4, 128.1, 125.3 (q,  $J = 3.8$  Hz), 124.2 (q,  $J = 272.1$  Hz), 119.4, 69.2, 25.9, 12.2; IR (Neat Film, NaCl) 2975, 2939, 1760, 1616, 1446, 1406, 1365, 1326, 1260, 1225, 1166, 1125, 1109, 1067, 1044, 988, 947, 930, 839, 779, 696  $\text{cm}^{-1}$ ; HRMS (MM:ESI-APCI+)  $m/z$  calc'd for  $\text{C}_{21}\text{H}_{23}\text{F}_3\text{NO}_3$   $[\text{M}+\text{NH}_4]^+$ : 394.1625, found 394.1612.

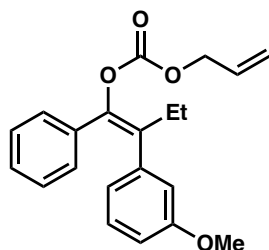

**(*E*)-allyl (2-(3-methoxyphenyl)-1-phenylbut-1-en-1-yl) carbonate (1t)**

Purified by column chromatography (8%  $\text{Et}_2\text{O}$  in hexanes) to provide a colorless oil (288.3 mg, 85% yield);  $^1\text{H}$  NMR (500 MHz,  $\text{CDCl}_3$ )  $\delta$  7.18–7.05 (m, 6H), 6.77–6.62 (m, 3H), 5.93 (ddt,  $J = 17.2, 10.5, 5.7$  Hz, 1H), 5.43–5.21 (m, 2H), 4.64 (dt,  $J = 5.7, 1.4$  Hz, 2H), 3.66 (s, 3H), 2.56 (q,  $J = 7.5$  Hz, 2H), 0.99 (t,  $J = 7.5$  Hz, 3H);  $^{13}\text{C}$  NMR (126 MHz,  $\text{CDCl}_3$ )  $\delta$  159.5, 153.3, 143.0, 140.3, 135.2, 133.3, 131.4, 129.3, 128.9, 127.9, 122.1, 119.2, 115.0, 113.0, 69.1, 55.2, 26.0, 12.3; IR (Neat Film, NaCl) 2970, 1759, 1598, 1577, 1486, 1463, 1446, 1427, 1260, 1225, 1180, 1120, 1048, 988, 780, 698  $\text{cm}^{-1}$ ; HRMS (MM:ESI-APCI+)  $m/z$  calc'd for  $\text{C}_{21}\text{H}_{26}\text{NO}_4$   $[\text{M}+\text{NH}_4]^+$ : 356.1856, found 356.1845.

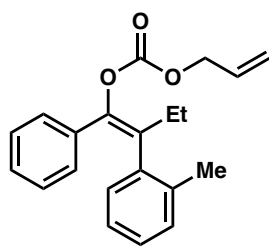

**(*E*)-allyl (1-phenyl-2-(*o*-tolyl)but-1-en-1-yl) carbonate (1u)**

Purified by column chromatography (5%  $\text{Et}_2\text{O}$  in hexanes) to provide a colorless oil (225.3 mg, 70% yield);  $^1\text{H}$  NMR (400 MHz,  $\text{CDCl}_3$ )  $\delta$  7.21–7.04 (m, 9H), 5.96 (ddt,  $J = 17.2, 10.4, 5.7$  Hz, 1H), 5.47–5.19 (m, 2H), 4.68 (dq,  $J = 5.7, 1.2$  Hz, 2H), 2.67–2.41 (m, 2H), 2.13 (d,  $J = 0.6$  Hz, 3H), 1.00 (t,  $J = 7.5$  Hz, 3H);  $^{13}\text{C}$  NMR (100 MHz,  $\text{CDCl}_3$ )  $\delta$  153.4, 142.7, 138.1, 136.2, 135.2, 132.3, 131.4, 130.3, 129.7, 127.8, 127.8, 127.4, 125.8, 119.1, 69.0, 26.2, 19.6, 11.6; IR (Neat

Film, NaCl) 2970, 1758, 1494, 1444, 1363, 1259, 1222, 1132, 1088, 1044, 987, 918, 858, 762, 730, 694  $\text{cm}^{-1}$ ; HRMS (MM:ESI-APCI+)  $m/z$  calc'd for  $\text{C}_{21}\text{H}_{26}\text{NO}_3$   $[\text{M}+\text{NH}_4]^+$ : 340.1907, found 340.1912.

### Derivatization of Alkylation Products

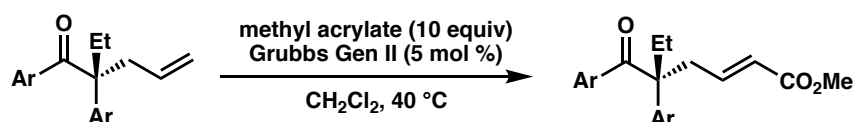

To an oven dried vial was added the alpha-quaternary ketone (0.1 mmol) followed by  $\text{CH}_2\text{Cl}_2$  (1.0 mL) and methyl acrylate (1.0 mmol, 90  $\mu\text{L}$ ). The resulting solution was stirred for five minutes at ambient temperature then treated with a solution of Grubb's second generation catalyst (4.2 mg) in 500  $\mu\text{L}$   $\text{CH}_2\text{Cl}_2$ . The reaction was then heated to 40  $^\circ\text{C}$  and stirred for five hours. The crude reaction mixture was directly concentrated and then purified by silica gel flash chromatography to obtain the desired product.

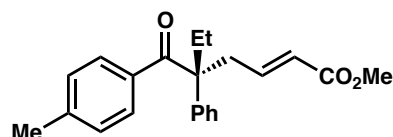

### methyl (*R,E*)-5-(4-methylbenzoyl)-5-phenylhept-2-enoate (SI1)

Purified by column chromatography (4%  $\text{Et}_2\text{O}$  in hexanes) to provide a white solid (25.4 mg, 76% yield; 90% ee,  $[\alpha]_{\text{D}}^{25} -117.37$  ( $c$  1.00,  $\text{CHCl}_3$ );  $^1\text{H}$  NMR (400 MHz,  $\text{CDCl}_3$ )  $\delta$  7.39–7.32 (m, 4H), 7.32–7.24 (m, 3H), 7.04–6.99 (m, 2H), 6.56 (ddd,  $J = 15.5, 9.0, 6.4$  Hz, 1H), 5.71 (ddd,  $J = 15.5, 1.7, 1.1$  Hz, 1H), 3.67 (s, 3H), 2.99 (ddd,  $J = 14.5, 9.1, 1.2$  Hz, 1H), 2.86 (ddt,  $J = 14.6, 6.4, 1.3$  Hz, 1H), 2.29 (s, 3H), 2.27–2.12 (m, 2H), 0.72 (t,  $J = 7.4$  Hz, 3H);  $^{13}\text{C}$  NMR (100 MHz,  $\text{CDCl}_3$ )  $\delta$  201.9, 166.6, 145.1, 142.7, 142.3, 133.9, 129.7, 129.2, 128.9, 127.4, 126.8, 124.0, 58.2, 51.6, 38.8, 26.9, 21.6, 8.2; IR (Neat Film, NaCl) 2970, 2949, 1724, 1672, 1606, 1495, 1446, 1435, 1335, 1270, 1199, 1183, 1167, 1140, 1036, 1000, 969, 854, 821, 773, 740, 702  $\text{cm}^{-1}$ ; HRMS (MM:ESI-APCI+)  $m/z$  calc'd for  $\text{C}_{22}\text{H}_{25}\text{O}_3$   $[\text{M}+\text{H}]^+$ : 337.1798, found 337.1785; SFC Conditions: 5% IPA, 2.5 mL/min, Chiralcel OB-H column,  $\lambda = 210$  nm,  $t_{\text{R}}$  (min): minor = 4.14, major = 4.95.

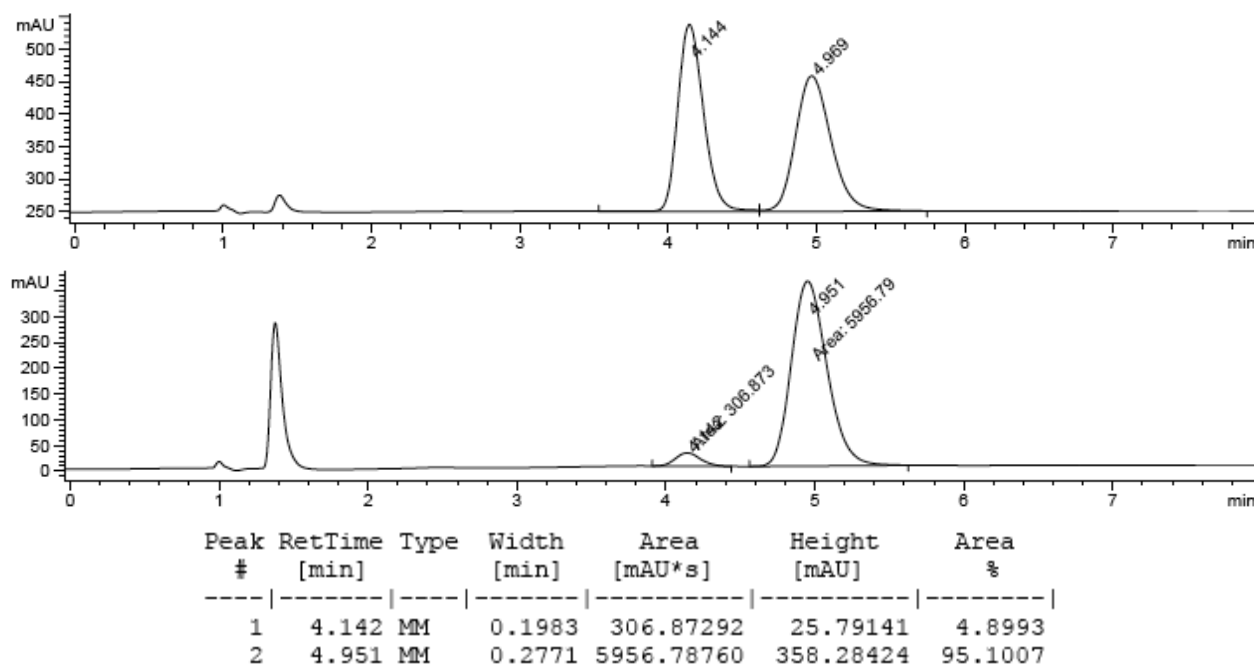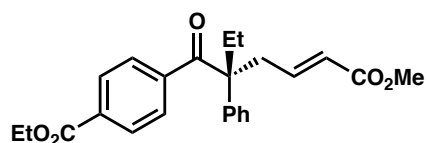

**ethyl (*R,E*)-4-(2-ethyl-6-methoxy-6-oxo-2-phenylhex-4-enoyl)benzoate (6)**

Purified by column chromatography (7% Et<sub>2</sub>O in hexanes) to provide a white solid (34.8 mg, 88% yield; 90%, [ $\alpha$ ]<sub>D</sub><sup>25</sup> −113.62 (*c* 1.00, CHCl<sub>3</sub>); <sup>1</sup>H NMR (400 MHz, CDCl<sub>3</sub>)  $\delta$  7.90–7.85 (m, 2H), 7.45–7.36 (m, 4H), 7.35–7.27 (m, 3H), 6.54 (ddd, *J* = 15.5, 8.9, 6.5 Hz, 1H), 5.71 (dt, *J* = 15.6, 1.5 Hz, 1H), 4.33 (q, *J* = 7.2 Hz, 2H), 3.67 (s, 3H), 3.02–2.82 (m, 2H), 2.17 (q, *J* = 7.4 Hz, 2H), 1.35 (t, *J* = 7.1 Hz, 3H), 0.72 (t, *J* = 7.4 Hz, 3H); <sup>13</sup>C NMR (100 MHz, CDCl<sub>3</sub>)  $\delta$  202.2, 166.5, 165.8, 144.4, 141.3, 140.3, 133.2, 129.4, 129.4, 129.3, 127.8, 126.8, 124.2, 61.4, 58.5, 51.6, 38.4, 26.5, 14.4, 8.2; IR (Neat Film, NaCl) 2974, 1723, 1681, 1657, 1495, 1446, 1436, 1337, 1312, 1276, 1228, 1199, 1170, 1106, 1020, 1001, 867, 839, 768, 729, 703 cm<sup>−1</sup>; HRMS (MM:ESI-APCI+) *m/z* calc'd for C<sub>24</sub>H<sub>27</sub>O<sub>5</sub> [M+H]<sup>+</sup>: 395.1853, found 395.1870; SFC Conditions: 7% IPA, 2.5 mL/min, Chiralcel OD-H column,  $\lambda$  = 210 nm, *t*<sub>R</sub> (min): minor = 9.38, major = 10.31.

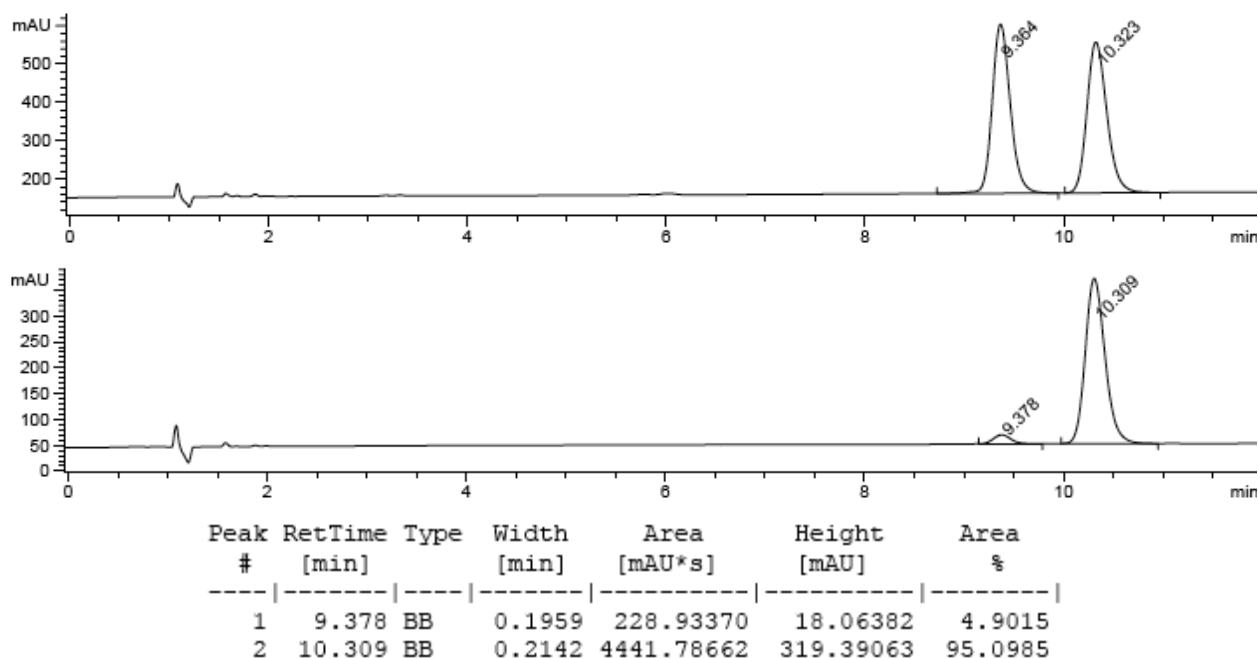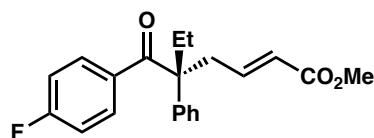

**methyl (*R,E*)-5-(4-fluorobenzoyl)-5-phenylhept-2-enoate (SI2)**

Purified by column chromatography (10% Et<sub>2</sub>O in hexanes) to provide a white solid (28.4 mg, 83% yield; 91% ee,  $[\alpha]_D^{25}$  -136.18 (*c* 1.00, CHCl<sub>3</sub>); <sup>1</sup>H NMR (300 MHz, CDCl<sub>3</sub>) δ 7.50–7.43 (m, 2H), 7.42–7.29 (m, 3H), 7.27–7.20 (m, 2H), 6.94–6.83 (m, 2H), 6.54 (ddd, *J* = 15.5, 9.1, 6.5 Hz, 1H), 5.71 (ddd, *J* = 15.6, 1.7, 1.2 Hz, 1H), 3.67 (s, 3H), 3.08–2.80 (m, 2H), 2.18 (q, *J* = 7.4 Hz, 2H), 0.72 (t, *J* = 7.4 Hz, 3H); <sup>19</sup>F NMR (282 MHz, CDCl<sub>3</sub>) δ -106.5 (tt, *J* = 8.4, 5.4 Hz); <sup>13</sup>C NMR (100 MHz, CDCl<sub>3</sub>) δ 200.8, 166.6, 164.8 (d, *J* = 254.4 Hz), 144.7, 141.9, 132.8 (d, *J* = 3.2 Hz), 132.2 (d, *J* = 9.0 Hz), 129.4, 127.7, 126.7, 124.2, 115.3 (d, *J* = 21.6 Hz), 58.3, 51.6, 38.7, 26.9, 8.2; IR (Neat Film, NaCl) 2970, 2950, 1724, 1676, 1656, 1598, 1504, 1435, 1336, 1271, 1232, 1199, 1158, 1001, 848, 748, 703 cm<sup>-1</sup>; HRMS (MM:ESI-APCI+) *m/z* calc'd for C<sub>21</sub>H<sub>22</sub>FO<sub>3</sub> [M+H]<sup>+</sup>: 341.1548, found 348.1534; SFC Conditions: 5% IPA, 2.5 mL/min, Chiralcel OD-H column, λ = 210 nm, t<sub>R</sub> (min): minor = 7.43, major = 8.03.

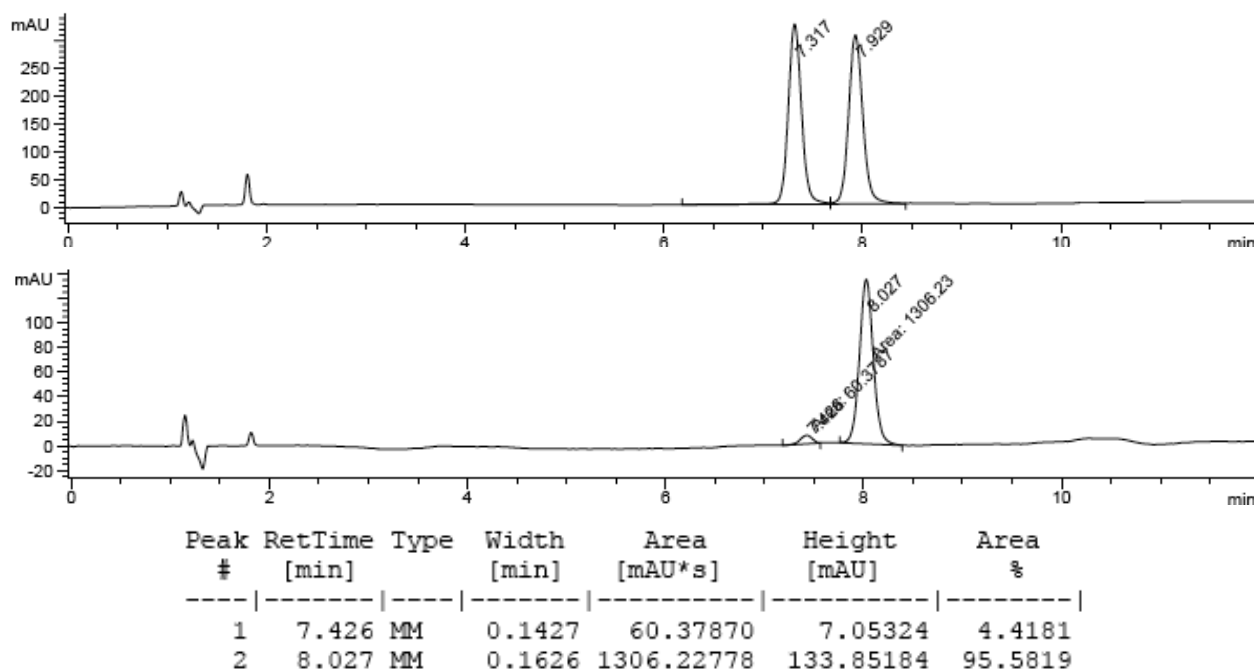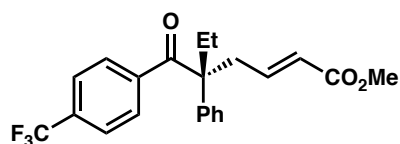

**methyl (*R,E*)-5-phenyl-5-(4-(trifluoromethyl)benzoyl)hept-2-enoate (SI3)**

Purified by column chromatography (10% Et<sub>2</sub>O in hexanes) to provide a white solid (32.2 mg, 82% yield) containing 6% dimethyl fumarate as an impurity; 90% ee,  $[\alpha]_D^{25}$  -116.94 (*c* 1.00, CHCl<sub>3</sub>); <sup>1</sup>H NMR (500 MHz, CDCl<sub>3</sub>) δ 7.48 (s, 4H), 7.43–7.37 (m, 2H), 7.36–7.31 (m, 1H), 7.29–7.26 (m, 2H), 6.54 (ddd, *J* = 15.5, 9.0, 6.4 Hz, 1H), 5.78–5.66 (m, 1H), 3.67 (s, 3H), 3.04–2.81 (m, 2H), 2.27–2.10 (m, 2H), 0.73 (t, *J* = 7.4 Hz, 3H); <sup>19</sup>F NMR (282 MHz, CDCl<sub>3</sub>) δ -63.3 (s); <sup>13</sup>C NMR (100 MHz, CDCl<sub>3</sub>) δ 201.7, 166.5, 144.3, 141.2, 139.7, 133.3 (q, *J* = 32.7 Hz), 129.7, 129.5, 127.9, 126.8, 125.3 (q, *J* = 3.7 Hz), 124.3, 123.6 (d, *J* = 272.8 Hz), 58.5, 51.6, 38.4, 26.5, 8.2; IR (Neat Film, NaCl) 2972, 2952, 1725, 1682, 1657, 1446, 1407, 1326, 1272, 1227, 1199, 1169, 1131, 1068, 1001, 858, 755, 702 cm<sup>-1</sup>; HRMS (MM:ESI-APCI+) *m/z* calc'd for C<sub>22</sub>H<sub>25</sub>F<sub>3</sub>NO<sub>3</sub> [M+NH]<sup>+</sup>: 408.1781, found 408.1771; SFC Conditions: 5% IPA, 2.5 mL/min, Chiralpak AD-H column, λ = 210 nm, t<sub>R</sub> (min): major = 4.47, minor = 5.90.

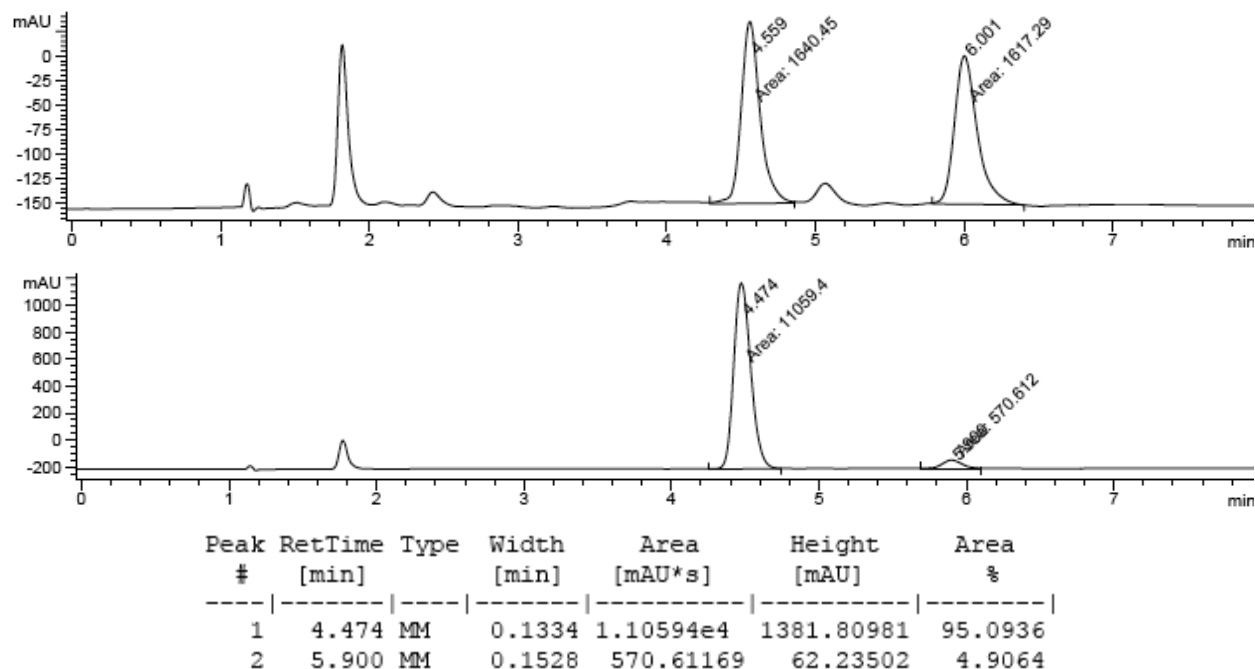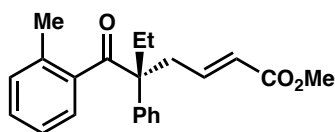

#### methyl (*R,E*)-5-(2-methylbenzoyl)-5-phenylhept-2-enoate (SI4)

Purified by column chromatography (7% Et<sub>2</sub>O in hexanes) to provide a colorless oil (25.8 mg, 77% yield); 73% ee,  $[\alpha]_D^{25}$  -66.93 (*c* 1.00, CHCl<sub>3</sub>); <sup>1</sup>H NMR (500 MHz, CDCl<sub>3</sub>) δ 7.42–7.30 (m, 5H), 7.20 (dd, *J* = 4.1, 1.0 Hz, 2H), 6.90–6.81 (m, 1H), 6.65–6.55 (m, 2H), 5.72 (dt, *J* = 15.6, 1.4 Hz, 1H), 3.68 (s, 3H), 3.07–2.88 (m, 2H), 2.37 (s, 3H), 2.13 (q, *J* = 7.4 Hz, 2H), 0.74 (t, *J* = 7.4 Hz, 3H); <sup>13</sup>C NMR (100 MHz, CDCl<sub>3</sub>) δ 206.3, 166.6, 144.9, 141.2, 138.2, 137.7, 132.1, 130.3, 129.2, 127.6, 127.5, 126.8, 124.8, 124.0, 58.8, 51.6, 37.7, 26.7, 21.1, 8.1; IR (Neat Film, NaCl) 3059, 3022, 2970, 2950, 1725, 1681, 1656, 1494, 1446, 1436, 1337, 1269, 1229, 1197, 1170, 1036, 995, 763, 734, 702 cm<sup>-1</sup>; HRMS (MM:ESI-APCI+) *m/z* calc'd for C<sub>22</sub>H<sub>25</sub>O<sub>3</sub> [M+H]<sup>+</sup>: 337.1798, found 337.1813; SFC Conditions: 10% IPA, 2.5 mL/min, Chiralpak IC column, λ = 210 nm, *t<sub>R</sub>* (min): major = 5.74, minor = 6.49.

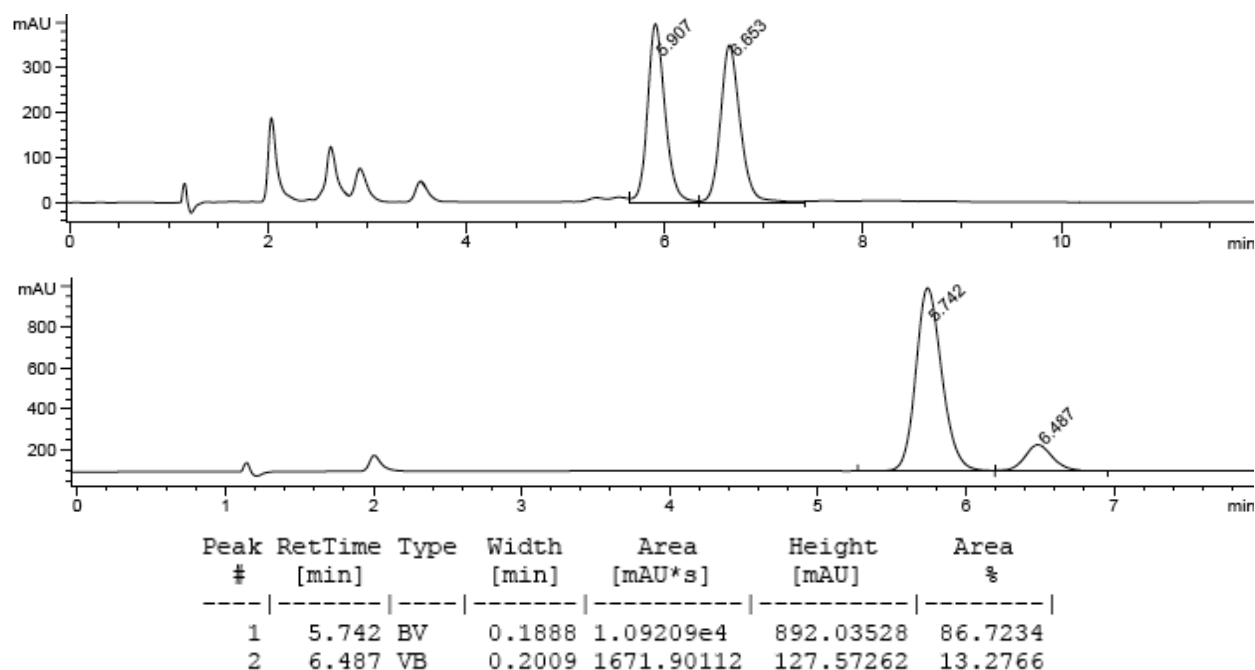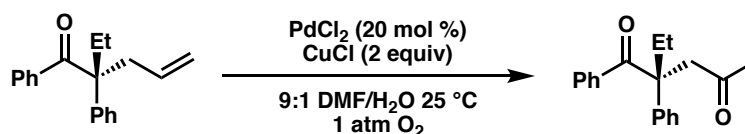

### (R)-2-ethyl-1,2-diphenylpentane-1,4-dione (3)

To a 20 mL vial containing alpha quaternary ketone **2a** (0.2 mmol, 52.8 mg) dissolved in 5 mL of 9:1 DMF/ $\text{H}_2\text{O}$  was added  $\text{PdCl}_2$  (0.04 mmol, 7.1 mg) and  $\text{CuCl}$  (0.4 mmol, 39.6 mg), and the vial sealed with a Teflon-lined septum cap. The vial was then quickly evacuated and backfilled three times with a balloon of  $\text{O}_2$ , and then stirred at 25 °C under a balloon of  $\text{O}_2$  for 16 h. The crude reaction was then diluted with EtOAc, followed by water and brine. The layers were separated, and the aqueous layer extracted with EtOAc twice. The combined organic layers were dried over  $\text{Na}_2\text{SO}_4$  and concentrated. The crude product was purified by silica gel flash chromatography (20%  $\text{Et}_2\text{O}$  in hexanes) to afford the desired product as a white, waxy solid in a 14:1 ketone/aldehyde ratio (47.4 mg, 85% yield);  $[\alpha]_{\text{D}}^{25} -87.8$  ( $c$  1.00,  $\text{CHCl}_3$ );  $^1\text{H}$  NMR of ketone (500 MHz,  $\text{CDCl}_3$ )  $\delta$  7.43–7.27 (m, 8H), 7.23–7.16 (m, 2H), 3.32 (d,  $J$  = 16.2 Hz, 1H), 3.18 (d,  $J$  = 16.2 Hz, 1H), 2.59–2.46 (m, 1H), 2.28–2.17 (m, 1H), 1.82 (s, 3H), 0.72 (t,  $J$  = 7.4 Hz, 3H);  $^{13}\text{C}$  NMR of ketone (100 MHz,  $\text{CDCl}_3$ )  $\delta$  207.3, 202.7, 141.4, 137.5, 131.5, 129.2, 129.2, 128.0, 127.5, 126.9, 57.0, 47.5, 31.8, 27.2, 8.7; IR (Neat Film, NaCl) 3059, 2971, 2940, 2880, 1716, 1682, 1598, 1579, 1495, 1462, 1446, 1415, 1361, 1260, 1229, 1214, 1180, 1033,

1003, 986, 913, 783, 764, 716, 703, 646  $\text{cm}^{-1}$ ; HRMS (MM:ESI-APCI+)  $m/z$  calc'd for  $\text{C}_{19}\text{H}_{21}\text{O}_2$   $[\text{M}+\text{H}]^+$ : 281.1536, found 281.1534.

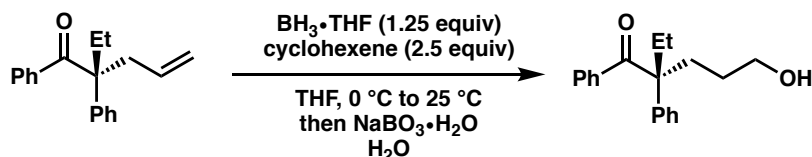

**(*R*)-2-ethyl-5-hydroxy-1,2-diphenylpentan-1-one (4)**

To a one dram vial was added a 1 M solution of  $\text{BH}_3\cdot\text{THF}$  (0.25 mmol, 250  $\mu\text{L}$ ) and the vial cooled to 0  $^\circ\text{C}$ . Cyclohexene (0.5 mmol, 51  $\mu\text{L}$ ) was then added neat, dropwise and the mixture stirred at 0  $^\circ\text{C}$  for 1 h. A solution of alpha quaternary ketone **2a** (0.2 mmol, 52.8 mg) in 1.0 mL THF was then added, and the reaction was allowed to warm to room temperature and stirred for 4 h. Water (500  $\mu\text{L}$ ) was then added to the vial followed by  $\text{NaBO}_3\cdot 4\text{H}_2\text{O}$  (1 mmol, 153.9 mg) and the resulting mixture stirred vigorously for 18 h. The crude reaction was diluted with  $\text{Et}_2\text{O}$  and water, and the layers separated. The aqueous layer was extracted with  $\text{Et}_2\text{O}$  twice, and the combined organic layers were washed with brine, dried over  $\text{Na}_2\text{SO}_4$ , and concentrated. The crude product was purified by preparative TLC (30% acetone in hexanes) to afford the desired product as a colorless oil (42.2 mg, 75% yield);  $[\alpha]_{\text{D}}^{25} -11.8$  ( $c$  1.00,  $\text{CHCl}_3$ );  $^1\text{H}$  NMR (500 MHz,  $\text{CDCl}_3$ )  $\delta$  7.42–7.32 (m, 5H), 7.31–7.26 (m, 3H), 7.22–7.15 (m, 2H), 3.52 (td,  $J = 6.6, 2.4$  Hz, 2H), 2.22–2.09 (m, 4H), 1.32–1.23 (m, 2H), 0.69 (t,  $J = 7.4$  Hz, 3H);  $^{13}\text{C}$  NMR (100 MHz,  $\text{CDCl}_3$ )  $\delta$  203.9, 142.9, 137.2, 131.8, 129.4, 129.0, 128.1, 127.1, 127.0, 63.4, 58.1, 30.5, 27.1, 27.0, 8.1; IR (Neat Film, NaCl) 3336 (br), 3059, 2965, 2878, 1673, 1597, 1578, 1495, 1446, 1383, 1229, 1180, 1060, 1004, 913, 761, 702  $\text{cm}^{-1}$ ; HRMS (MM:ESI-APCI+)  $m/z$  calc'd for  $\text{C}_{19}\text{H}_{23}\text{O}_2$   $[\text{M}+\text{H}]^+$ : 283.1693, found 283.1688.

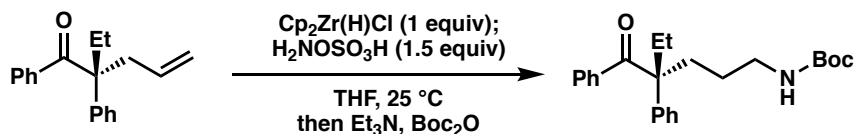

***tert*-butyl (*R*)-(4-benzoyl-4-phenylhexyl)carbamate (5)**

In a nitrogen-filled glovebox, ketone **2a** (0.1 mmol, 26.4 mg) was added to a one dram vial followed by THF (1 mL).  $\text{Cp}_2\text{Zr}(\text{H})\text{Cl}$  was then added (0.1 mmol, 25.7 mg) and the resulting suspension stirred at room temperature for 30 minutes, at which point the reaction became a

homogeneous yellow solution. Hydroxylamine-*O*-sulfonic acid was then added (0.15 mmol, 17.0 mg) and the vial removed from the glovebox and stirred at room temperature for 1 hr. Et<sub>3</sub>N (0.3 mmol, 42  $\mu$ L) was then added followed by Boc<sub>2</sub>O (0.3 mmol, 69  $\mu$ L) and the reaction continued for 2 hr and then filtered through a plug of silica. The crude product was purified via preparative TLC (12% Et<sub>2</sub>O in hexanes) to afford the desired product at a viscous colorless oil (83% yield, 31.5 mg): [ $\alpha$ ]<sub>D</sub><sup>25</sup> 24.5 (*c* 1.00, CHCl<sub>3</sub>); <sup>1</sup>H NMR (500 MHz, CDCl<sub>3</sub>)  $\delta$  7.46–7.36 (m, 5H), 7.33 (td, *J* = 6.7, 1.1 Hz, 3H), 7.29–7.19 (m, 2H), 4.41 (s, 1H), 3.21–2.96 (m, 2H), 2.16 (dq, *J* = 42.9, 9.0, 8.2 Hz, 4H), 1.46 (s, 9H), 1.22 (ddd, *J* = 10.1, 6.6, 2.9 Hz, 1H), 0.73 (t, *J* = 7.4 Hz, 3H); <sup>13</sup>C NMR (100 MHz, CDCl<sub>3</sub>)  $\delta$  203.8, 155.9, 142.8, 137.2, 131.8, 129.4, 129.0, 128.1, 127.1, 127.0, 79.1, 58.1, 41.0, 31.4, 28.5, 26.9, 24.1, 8.1; IR (Neat Film, NaCl) 3377 (br), 2972, 1701, 1676, 1597, 1578, 1516, 1446, 1391, 1365, 1270, 1248, 1173, 761, 732, 703; HRMS (MM:ESI-APCI+) *m/z* calc'd for C<sub>24</sub>H<sub>32</sub>NO<sub>3</sub> [M+H]<sup>+</sup>: 382.2377, found 382.2375.

### Preliminary Investigation of Fully Alkyl Quaternary Stereocenters

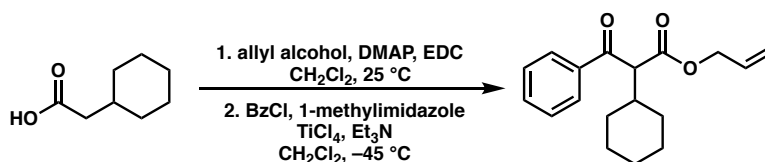

#### allyl 2-cyclohexyl-3-oxo-3-phenylpropanoate (SI5)

To a flame-dried flask containing cyclohexanecarboxylic acid (10 mmol, 1.4220 g), DMAP (1 mmol, 122 mg), and EDC-HCl (11 mmol, 2.1087 g) was added CH<sub>2</sub>Cl<sub>2</sub> (30 mL) and the resulting mixture stirred for 10 minutes at 25 °C. Allyl alcohol (10 mmol, 680  $\mu$ L) was then added and the reaction continued at 25 °C for 1 h, then diluted with water and extracted with CH<sub>2</sub>Cl<sub>2</sub>. The combined organic layers were washed with brine, then dried with Na<sub>2</sub>SO<sub>4</sub>. The crude product was filtered through a plug of silica and concentrated to a colorless oil (1.5733 g, 86% crude yield) which was then transferred to a flame-dried flask containing benzoyl chloride (8.61 mmol, 1.0 mL) dissolved in 40 mL CH<sub>2</sub>Cl<sub>2</sub>. The reaction was cooled to –45 °C and 1-methylimidazole (10.34 mmol, 824  $\mu$ L) was added followed by sequential slow addition of TiCl<sub>4</sub> (30.15 mmol, 3.31 mL) over 20 minutes and Et<sub>3</sub>N (34.5 mmol, 4.8 mL) over 1 h. The resulting mixture was stirred for 1 h at –45 °C then slowly quenched with water. The aqueous layer was extracted with Et<sub>2</sub>O and the combined organic layers washed with water then brine, and dried over Na<sub>2</sub>SO<sub>4</sub>. The crude product was purified by silica gel flash chromatography (10% Et<sub>2</sub>O in hexanes) to

afford the desired product as a colorless oil (2.2396 g, 78% yield over two steps):  $^1\text{H}$  NMR (500 MHz,  $\text{CDCl}_3$ )  $\delta$  8.04–7.96 (m, 2H), 7.62–7.53 (m, 1H), 7.51–7.40 (m, 2H), 5.81 (ddt,  $J = 17.2, 10.4, 5.7$  Hz, 1H), 5.28–5.07 (m, 2H), 4.57 (ddt,  $J = 5.8, 2.9, 1.4$  Hz, 2H), 4.21 (d,  $J = 9.6$  Hz, 1H), 2.46–2.33 (m, 1H), 1.76 (tdt,  $J = 8.6, 3.5, 1.7$  Hz, 1H), 1.66 (dddd,  $J = 12.9, 8.6, 4.2, 2.5$  Hz, 4H), 1.40–1.24 (m, 2H), 1.23–1.06 (m, 2H), 1.01–0.86 (m, 1H);  $^{13}\text{C}$  NMR (100 MHz,  $\text{CDCl}_3$ )  $\delta$  194.7, 168.7, 137.2, 133.6, 131.7, 128.8, 128.6, 118.6, 65.8, 60.5, 38.5, 31.5, 31.0, 26.2, 26.1, 26.0; IR (Neat Film, NaCl) 2927, 2852, 1736, 1686, 1596, 1448, 1284, 1239, 1199, 1154, 1128, 990, 928, 670  $\text{cm}^{-1}$ ; HRMS (MM:ESI-APCI+)  $m/z$  calc'd for  $\text{C}_{18}\text{H}_{26}\text{NO}_3$   $[\text{M}+\text{NH}_4]^+$ : 304.1907, found 304.1913.

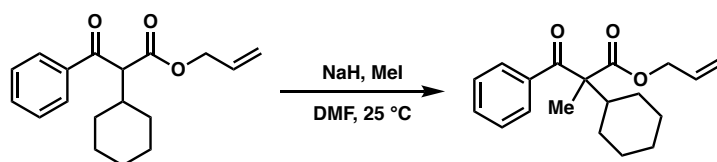

#### allyl 2-cyclohexyl-2-methyl-3-oxo-3-phenylpropanoate (SI6)

To a flame-dried flask containing NaH (2 mmol, 80 mg, 60% dispersion in mineral oil) and DMF (6 mL) was added beta-ketoester **SI5** (1 mmol, 286.4 mg) neat at 25 °C, and the resulting suspension stirred for 30 minutes. MeI (2 mmol, 125  $\mu\text{L}$ ) was then added and the reaction continued at 25 °C for 1.5 h. The reaction was quenched with saturated  $\text{NH}_4\text{Cl}$  and diluted with water and  $\text{Et}_2\text{O}$ . The aqueous layer was extracted with  $\text{Et}_2\text{O}$  and the combined organic layers dried over  $\text{MgSO}_4$ . The crude product was purified by silica gel flash chromatography (6%  $\text{Et}_2\text{O}$  in hexanes) to afford the desired product as a colorless oil (240.6 mg, 80%) containing some of the undesired *O*-alkylated product:  $^1\text{H}$  NMR (500 MHz,  $\text{CDCl}_3$ )  $\delta$  7.82–7.73 (m, 2H), 7.56–7.44 (m, 1H), 7.43–7.34 (m, 2H), 5.68 (ddt,  $J = 17.2, 10.4, 5.8$  Hz, 1H), 5.22–5.08 (m, 2H), 4.60–4.49 (m, 2H), 2.46 (tt,  $J = 11.9, 2.7$  Hz, 1H), 1.87–1.64 (m, 5H), 1.64–1.49 (m, 1H), 1.46 (s, 3H), 1.42–1.22 (m, 2H), 1.19–0.94 (m, 3H);  $^{13}\text{C}$  NMR (100 MHz,  $\text{CDCl}_3$ )  $\delta$  197.7, 173.3, 136.7, 132.3, 131.3, 128.4, 128.3, 118.7, 65.6, 60.9, 42.6, 28.6, 28.0, 26.8, 26.8, 26.5, 17.7; IR (Neat Film, NaCl) 2930, 2853, 2360, 1734, 1684, 1447, 1258, 1233, 1186, 1153, 1121, 1081, 964, 700  $\text{cm}^{-1}$ ; HRMS (MM:ESI-APCI+)  $m/z$  calc'd for  $\text{C}_{19}\text{H}_{25}\text{O}_3$   $[\text{M}+\text{H}]^+$ : 301.1798, found 301.1787.

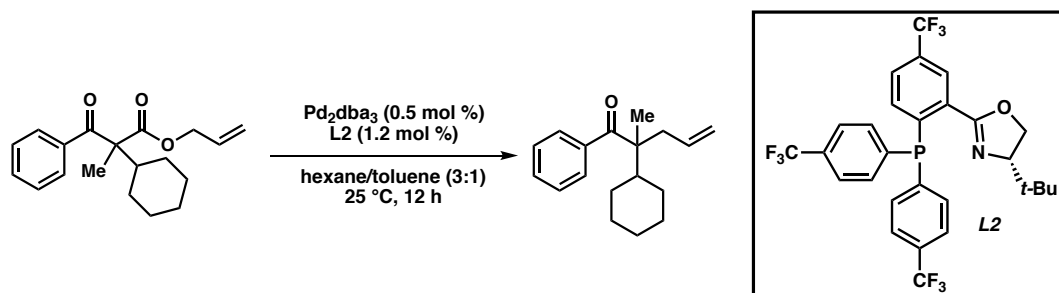

### 2-cyclohexyl-2-methyl-1-phenylpent-4-en-1-one (SI7)

In a nitrogen-filled glovebox, a solution of  $\text{Pd}_2(\text{dba})_3$  (1.8 mg/mL) and **L2** (2.8 mg/mL) in toluene was stirred for 30 minutes at 25 °C, then 0.5 mL of the resulting catalyst solution was added to a one dram vial containing beta-ketoester **SI6** (0.2 mmol) dissolved in hexanes (1.5 mL). The vial was sealed with a Teflon-lined cap, removed from the glovebox, and stirred at 25 °C for 12 h. The crude reaction mixture was concentrated then purified by preparative TLC to provide the desired alkylation product as a colorless oil (27.0 mg, 53% yield); 37% ee,  $[\alpha]_{\text{D}}^{25} - 7.7$  (*c* 1.00,  $\text{CHCl}_3$ );  $^1\text{H}$  NMR (400 MHz,  $\text{CDCl}_3$ )  $\delta$  7.67–7.58 (m, 2H), 7.49–7.32 (m, 3H), 5.77–5.53 (m, 1H), 5.13–4.87 (m, 2H), 2.72 (dd, *J* = 13.9, 6.6 Hz, 1H), 2.40–2.19 (m, 1H), 2.00 (tt, *J* = 11.3, 2.9 Hz, 1H), 1.84–1.56 (m, 4H), 1.48 (dt, *J* = 9.1, 3.2 Hz, 1H), 1.35–1.03 (m, 8H);  $^{13}\text{C}$  NMR (100 MHz,  $\text{CDCl}_3$ )  $\delta$  209.3, 140.3, 134.5, 130.8, 128.2, 127.6, 118.0, 55.3, 45.5, 42.2, 28.8, 27.5, 27.1, 27.0, 26.7, 18.5; IR (Neat Film, NaCl) 2929, 2853, 1672, 1446, 1379, 1216, 1002, 967, 916, 772, 723, 694  $\text{cm}^{-1}$ ; HRMS (MM:ESI-APCI+) *m/z* calc'd for  $\text{C}_{18}\text{H}_{25}\text{O}$   $[\text{M}+\text{H}]^+$ : 257.1900, found 257.1894; SFC Conditions : 5% IPA, 2.5 mL/min, Chiralpak AD-H column,  $\lambda$  = 210 nm,  $t_{\text{R}}$  (min): major = 6.16, minor = 6.92.

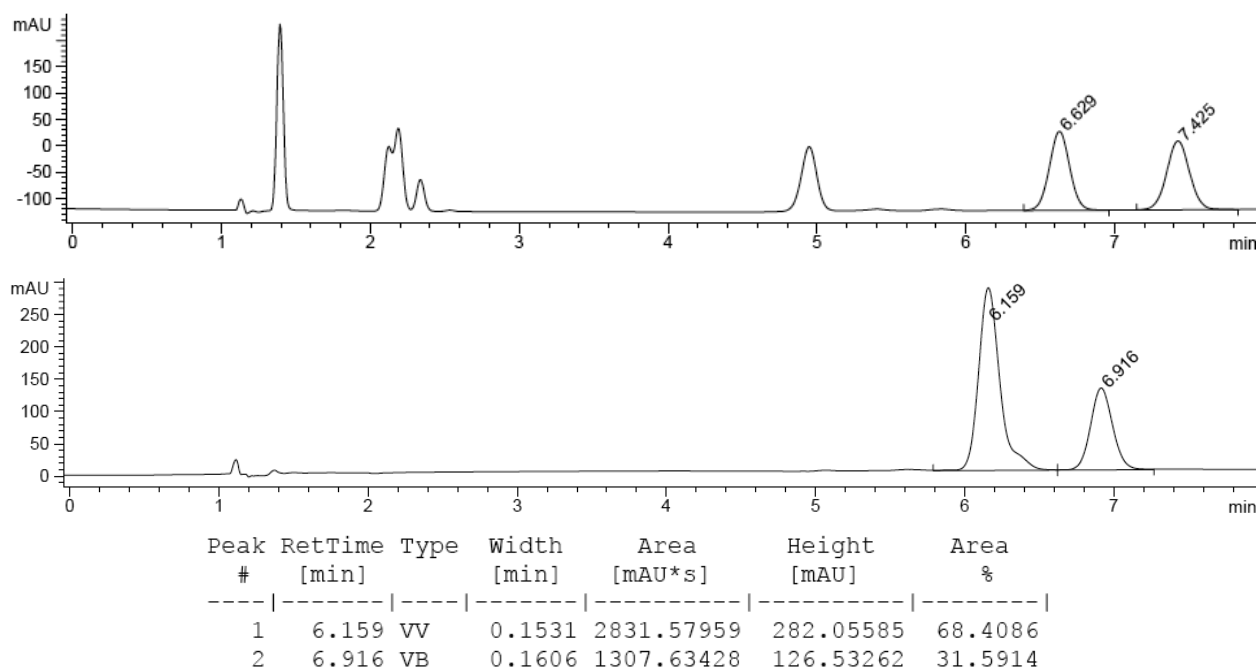

### Enantioselectivity Time Course Measurement

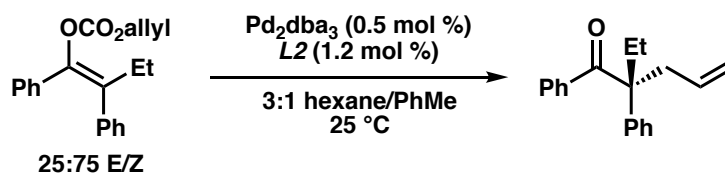

| entry | time (min) | ee   |
|-------|------------|------|
| 1     | 10         | 89.5 |
| 2     | 20         | 89.3 |
| 3     | 30         | 89.2 |
| 4     | 60         | 89.8 |
| 5     | 120        | 89.7 |
| 6     | 180        | 89.6 |

In a nitrogen-filled glovebox, a solution of  $\text{Pd}_2(\text{dba})_3$  (1.8 mg/mL) and **L2** (2.8 mg/mL) in toluene was stirred for 30 minutes at 25 °C, then 2.5 mL of the resulting catalyst solution was added to a vial containing 25:75 E/Z enol carbonate **1a** (1.0 mmol) dissolved in hexanes (7.5 mL). The vial was sealed with a Teflon-lined cap, removed from the glovebox, and stirred at 25 °C. At the indicated time intervals, 250  $\mu\text{L}$  of the reaction mixture was removed, filtered through a plug of silica, and purified by preparative TLC (10%  $\text{Et}_2\text{O}$  in hexanes). Analysis by chiral SFC showed that the ee of the product is initially high, and remains constant throughout the course of the reaction.

**References**

- (1) Pangborn, A. M.; Giardello, M. A.; Grubbs, R. H.; Rosen, R. K.; Timmers, F. J. *Organometallics* **1996**, *15*, 1518–1520.
- (2) Sonawane, R. P.; Jheengut, V.; Rabalakos, C.; Larouch-Gauthier, R.; Scott, H. K.; Aggarwal, V. K. *Angew. Chem. Int. Ed.* **2011**, *50*, 3760–3763.
- (3) Krout, M. R.; Mohr, J. T.; Stoltz, B. M. *Org. Synth.* **2009**, *86*, 181–205.
- (4) McDougal, N. T.; Steuff, J.; Mukherjee, H.; Virgil, S. C.; Stoltz, B. M. *Tetrahedron Lett.* **2010**, *51*, 5550–5554.
- (5) Trost, B. M.; Van Vranken, D. L.; Bingel, C. *J. Am. Chem. Soc.* **1992**, *114*, 9327–9343.
- (6) Li, B. X.; Le, D. N.; Mack, K. A.; McClory, A.; Lim, N.-K.; Cravillion, T.; Savage, S.; Han, C.; Collum, D. B.; Zhang, H.; Gosselin, F. *J. Am. Chem. Soc.* **2017**, *139*, 10777–10783.
