# Supplementary material
Source: PubMed Central journal article supplement (PMC6103296)
Supplement: NIHMS985449-supplement-Spectra_SI_2_revisions.pdf [file NIHMS985449-supplement-Spectra_SI_2_revisions.pdf]

## NMR and IR Spectra of New Compounds

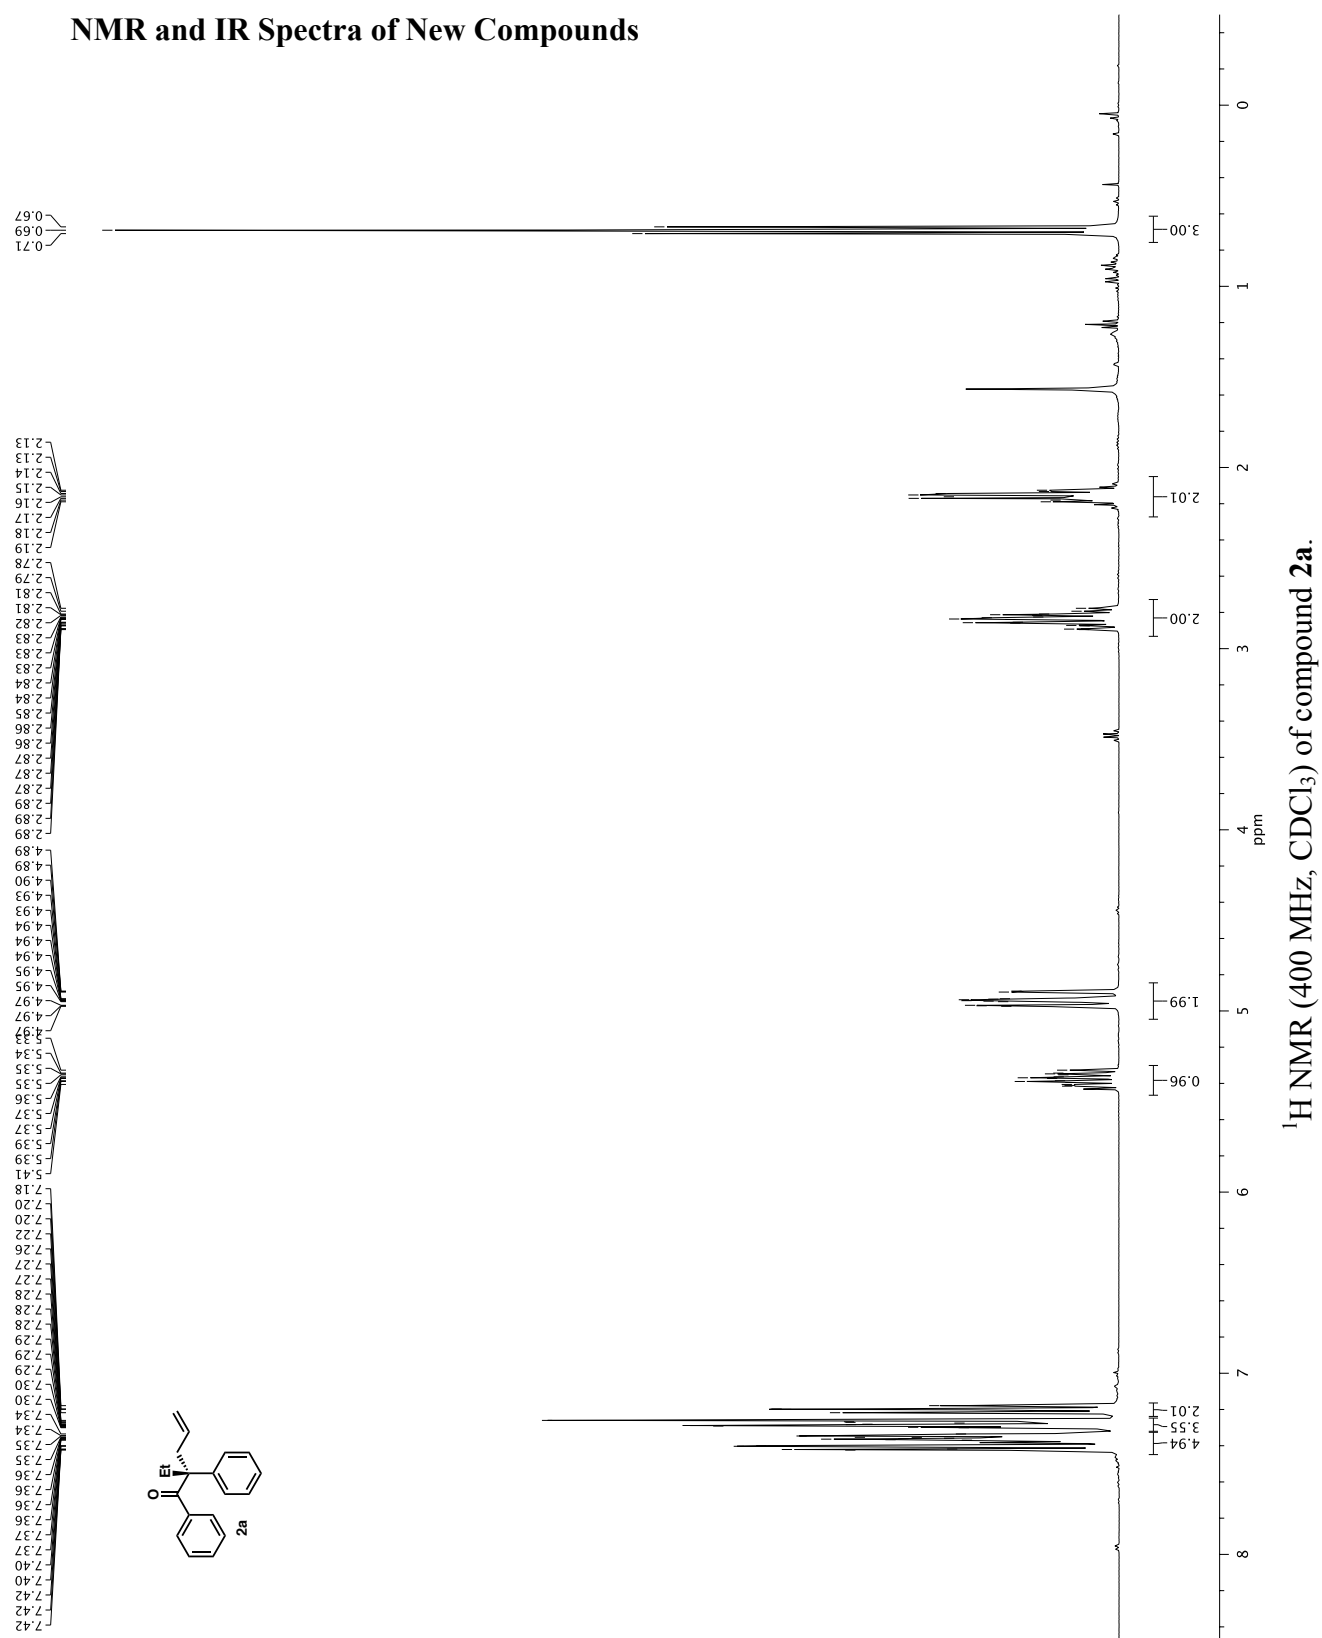

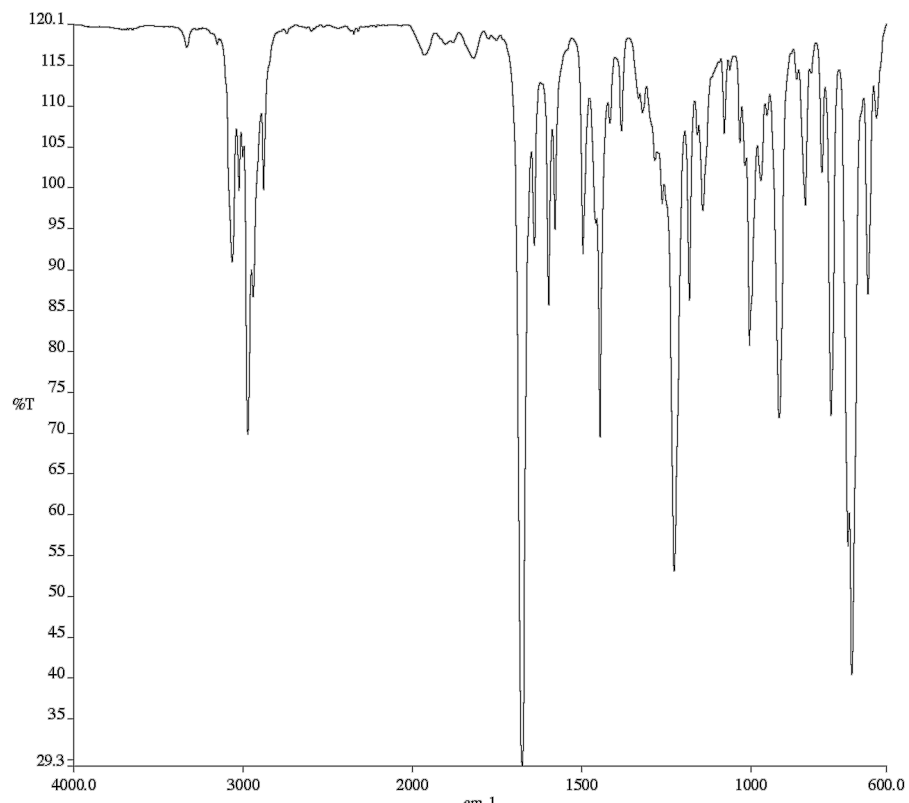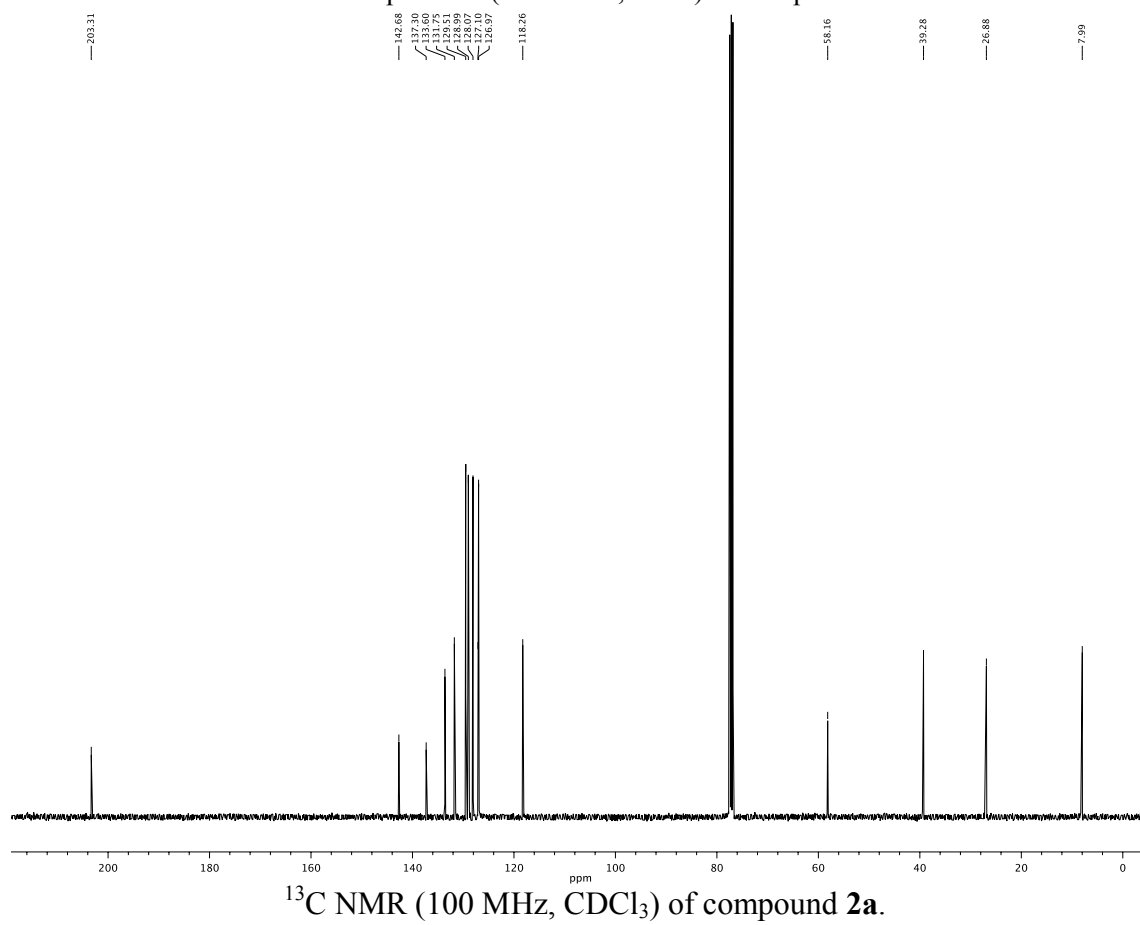

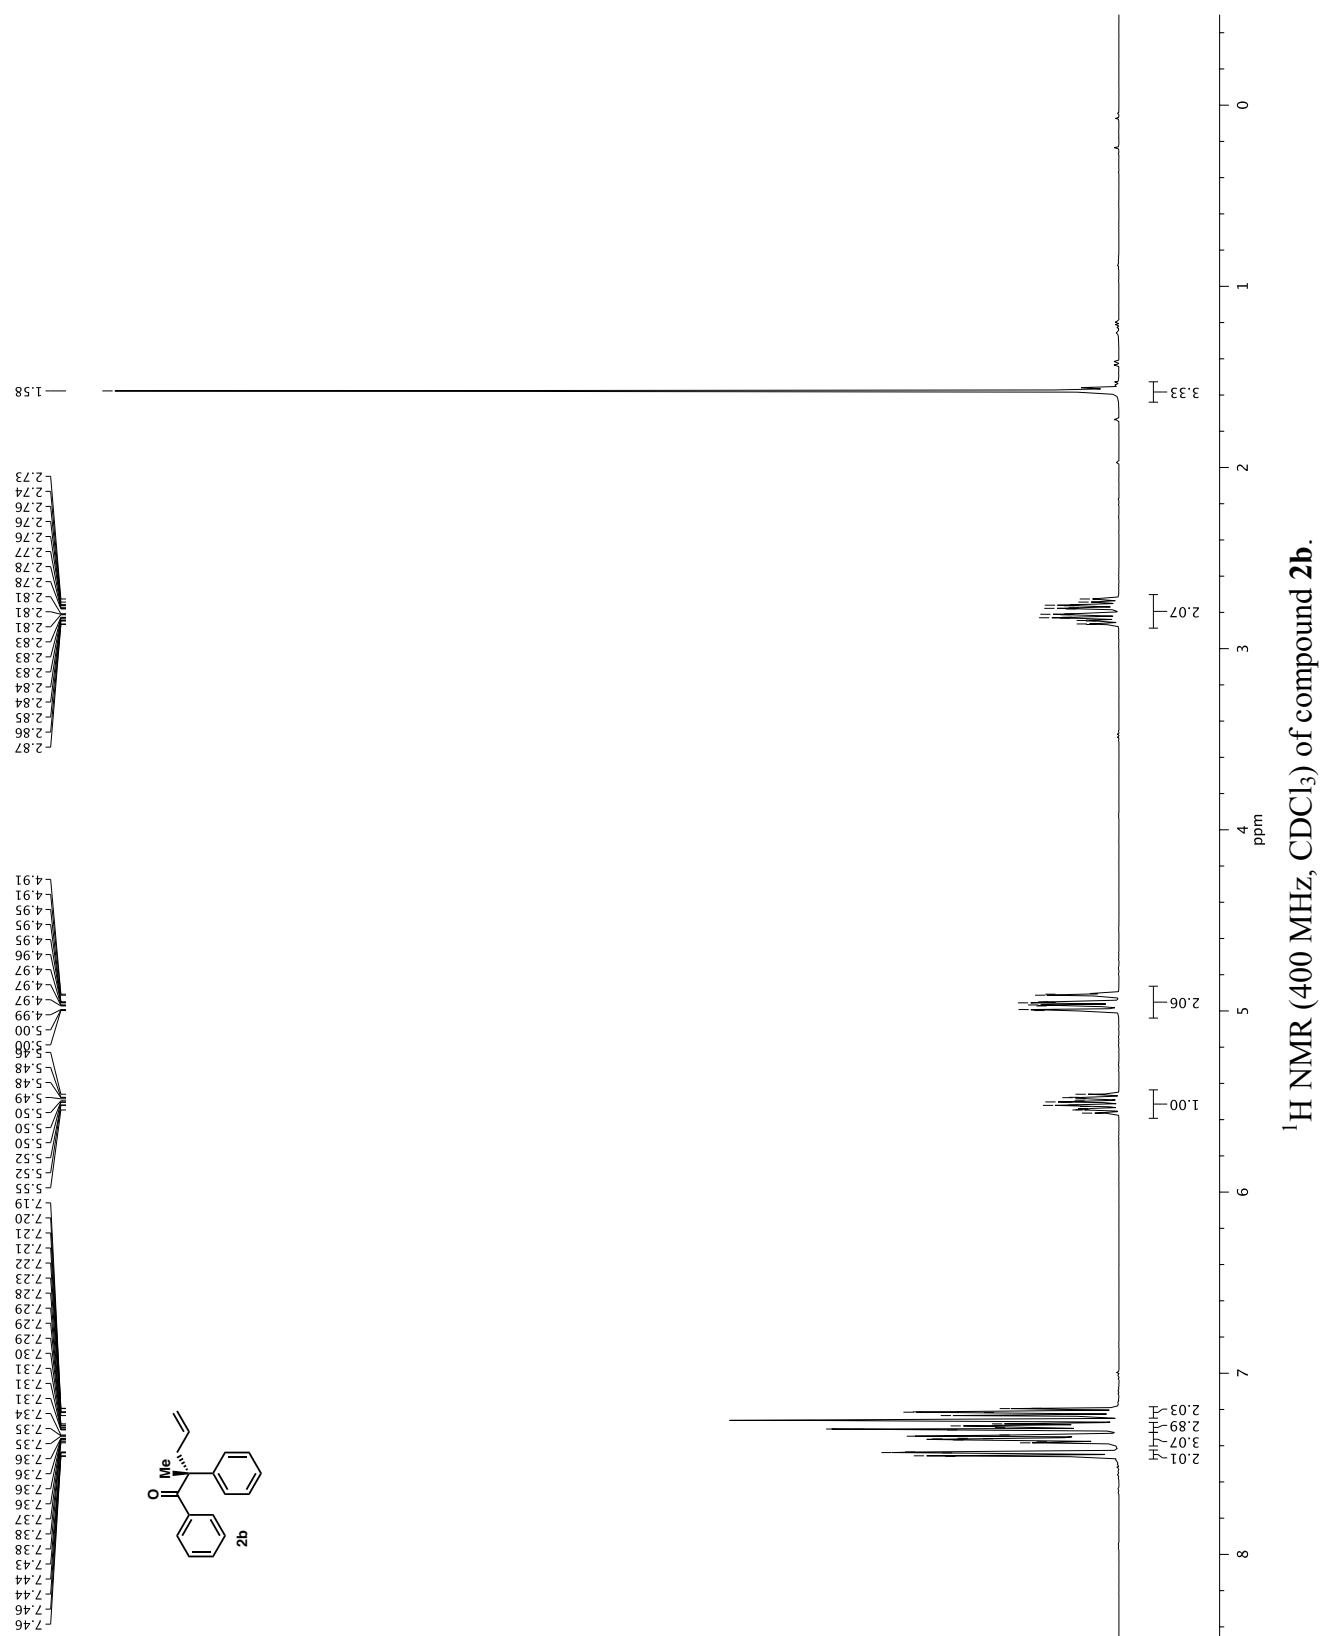

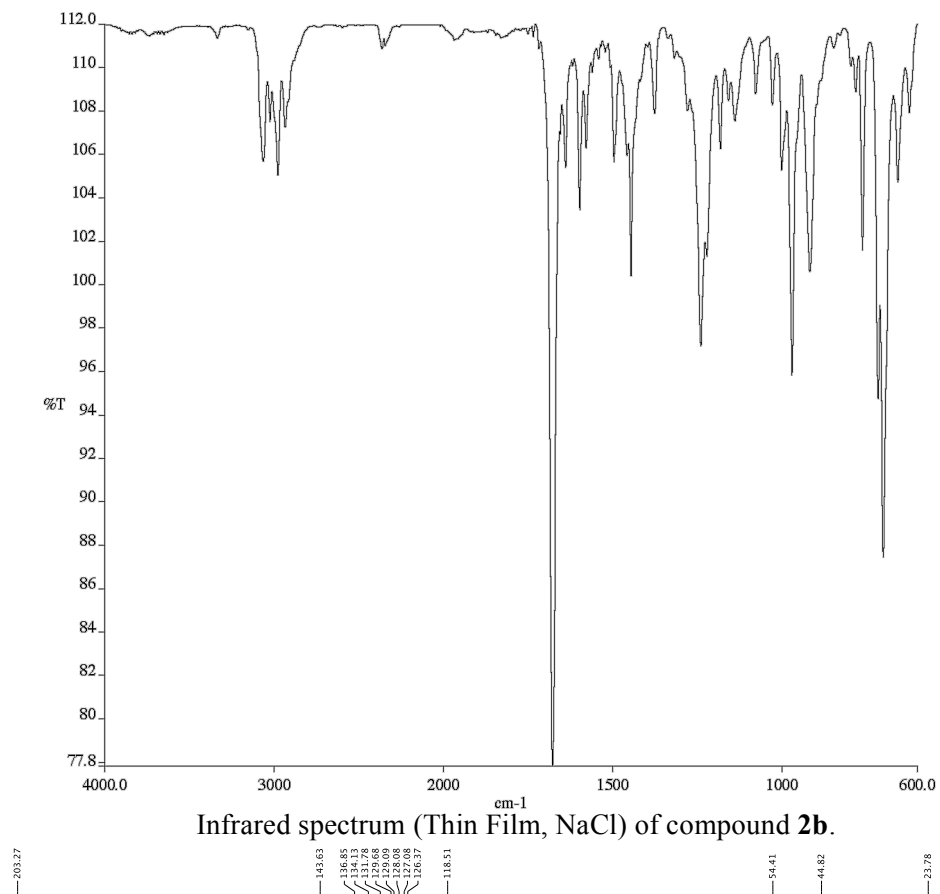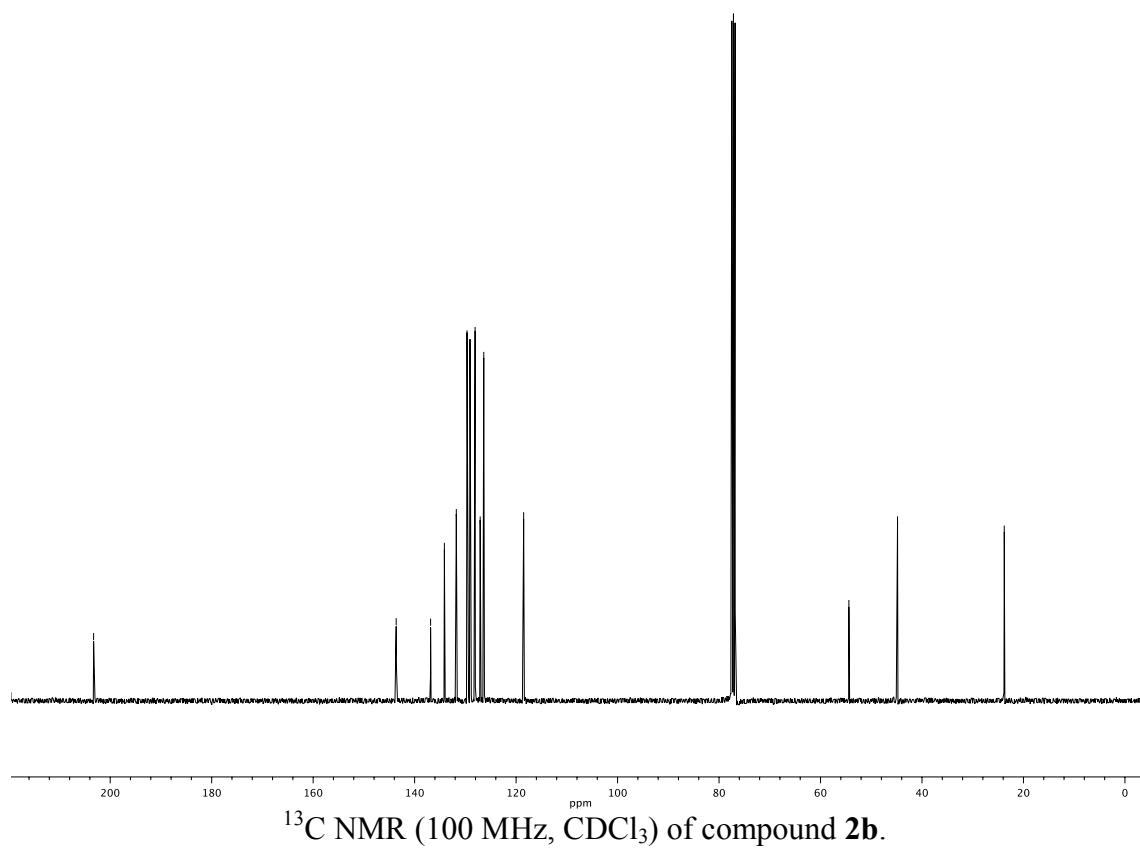

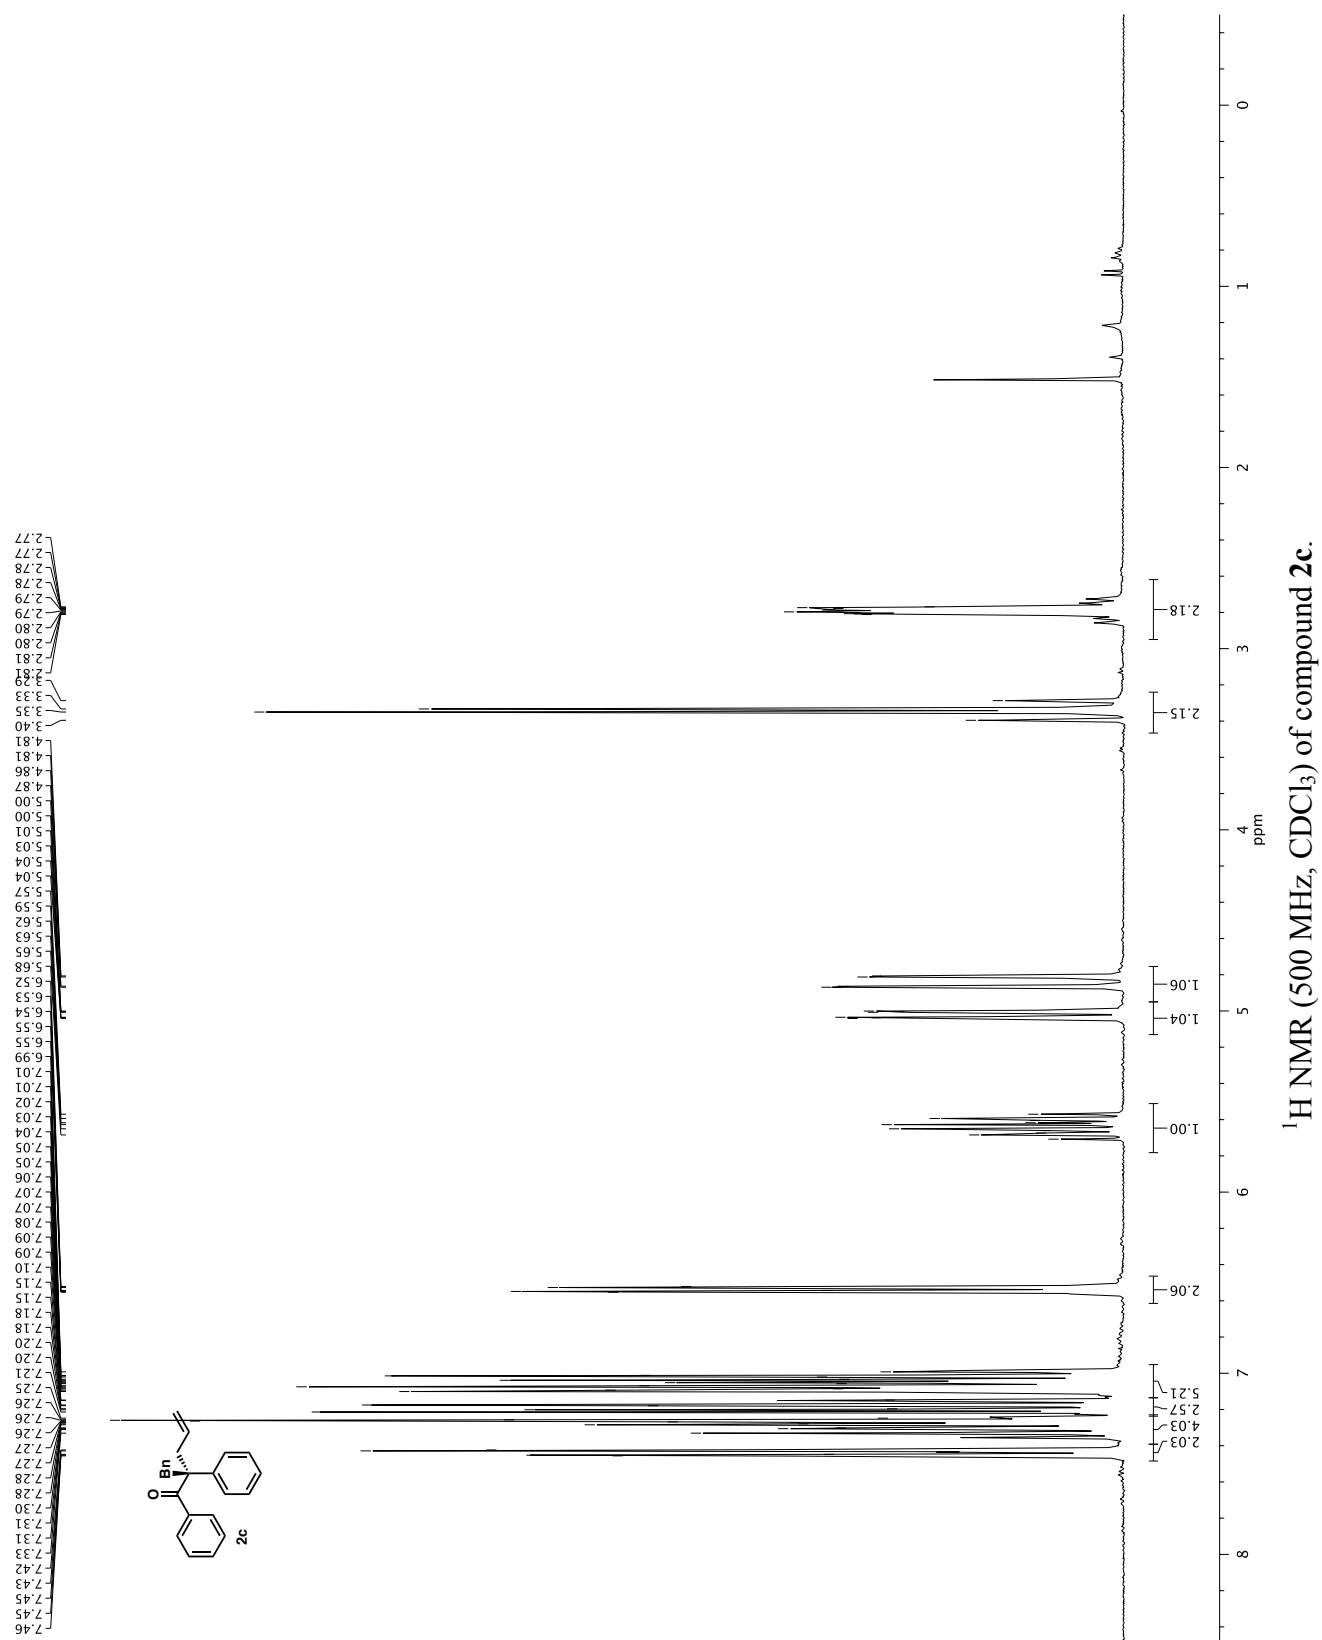

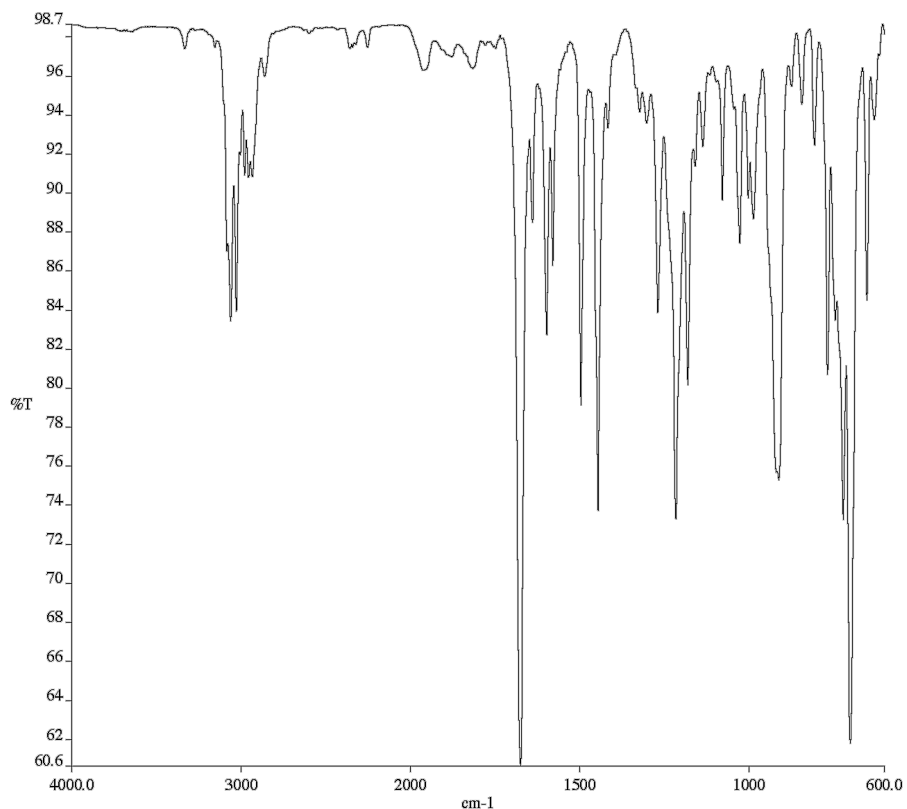Infrared spectrum (Thin Film, NaCl) of compound **2c**.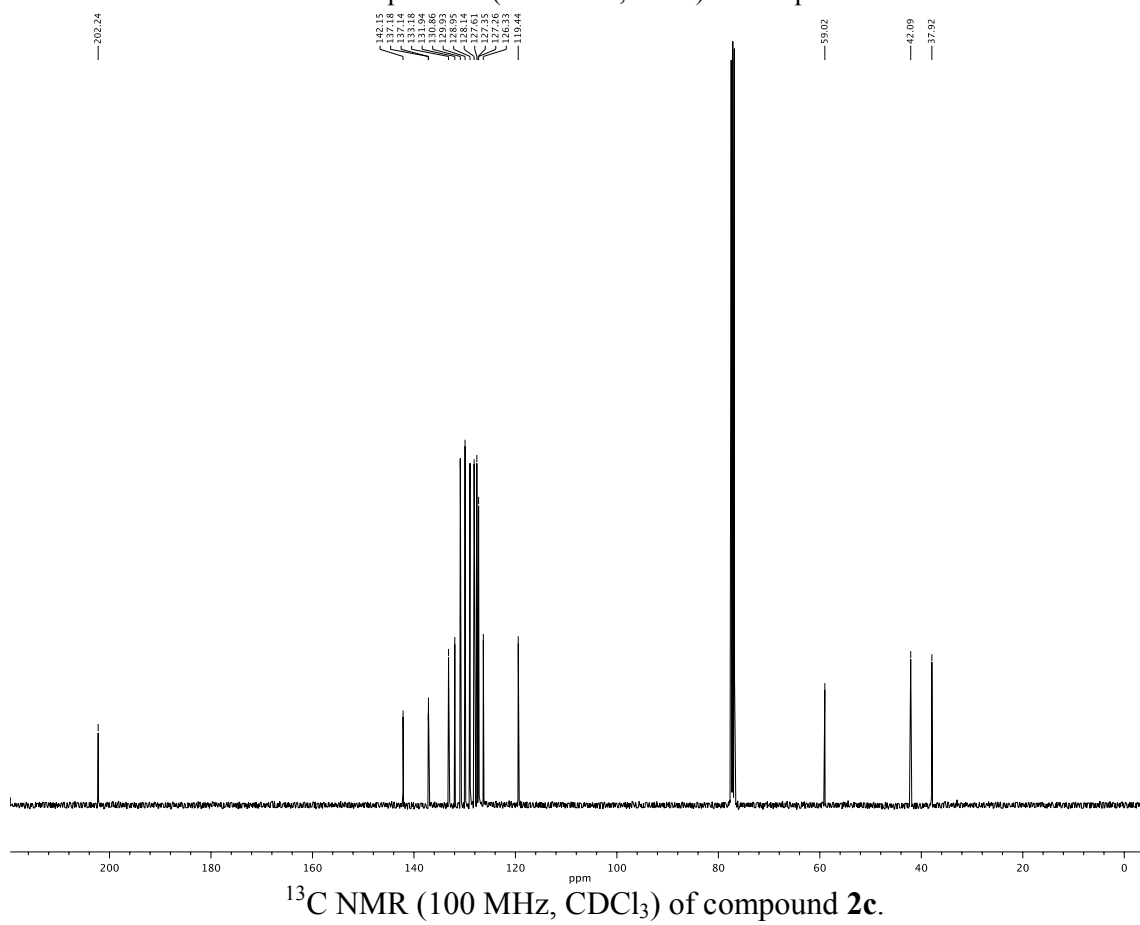<sup>13</sup>C NMR (100 MHz, CDCl<sub>3</sub>) of compound **2c**.

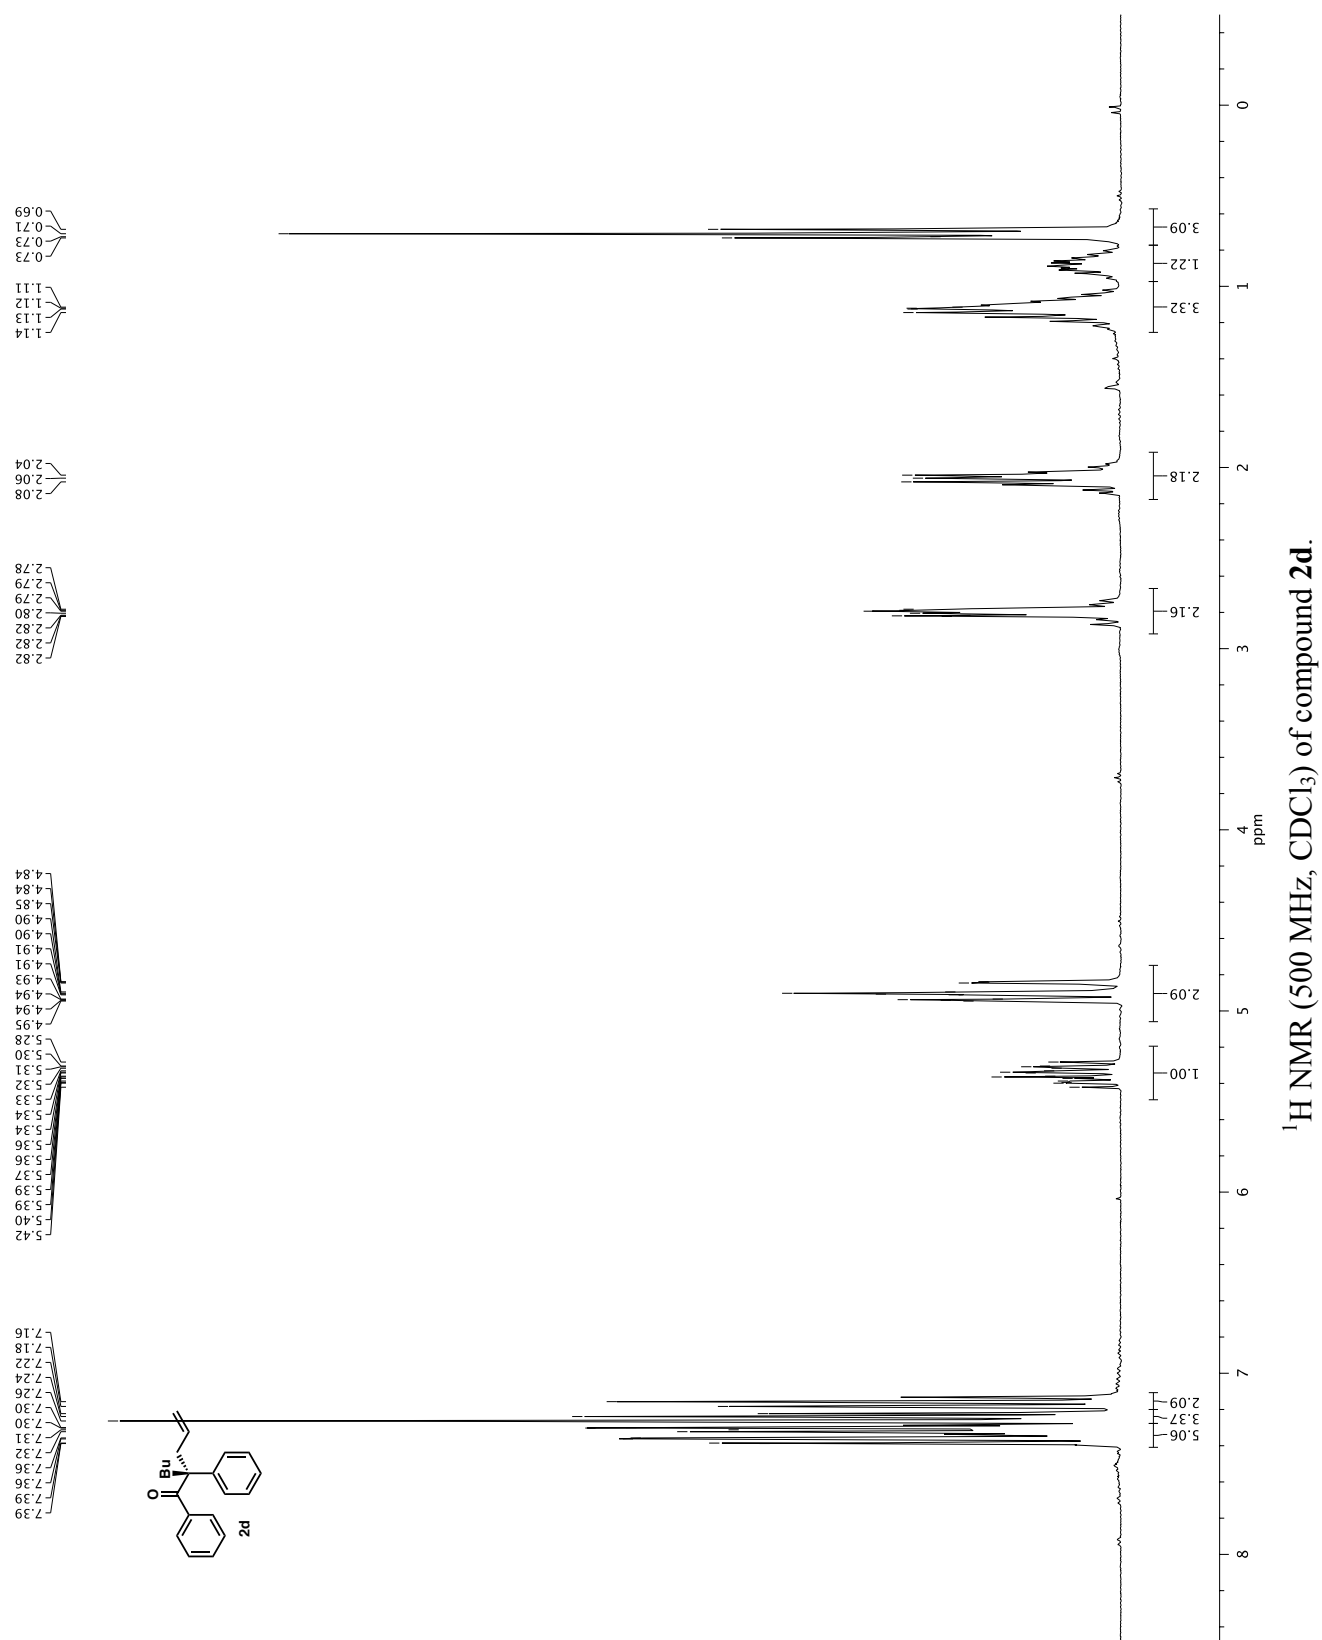

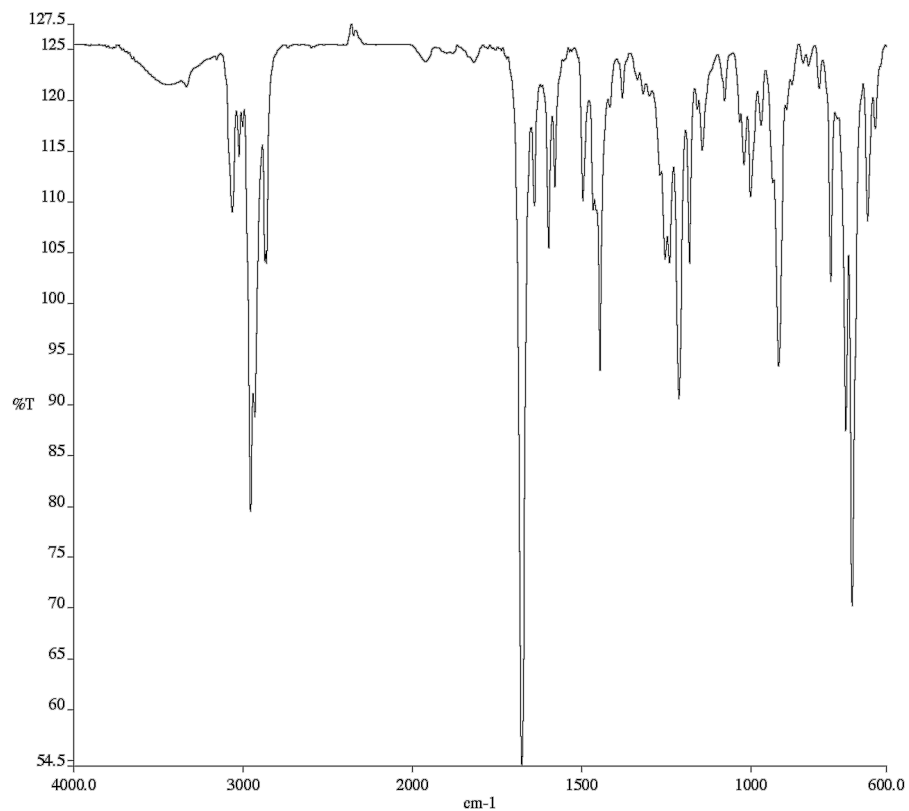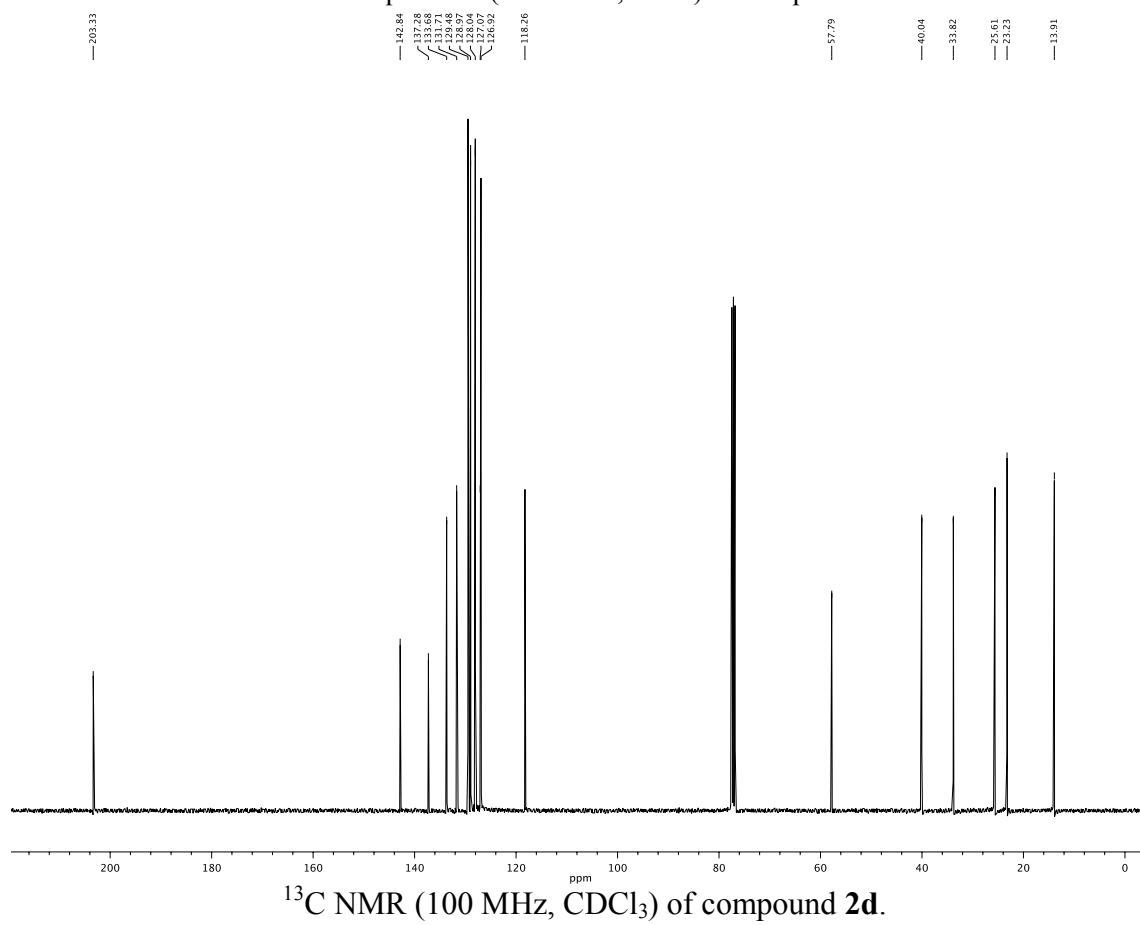



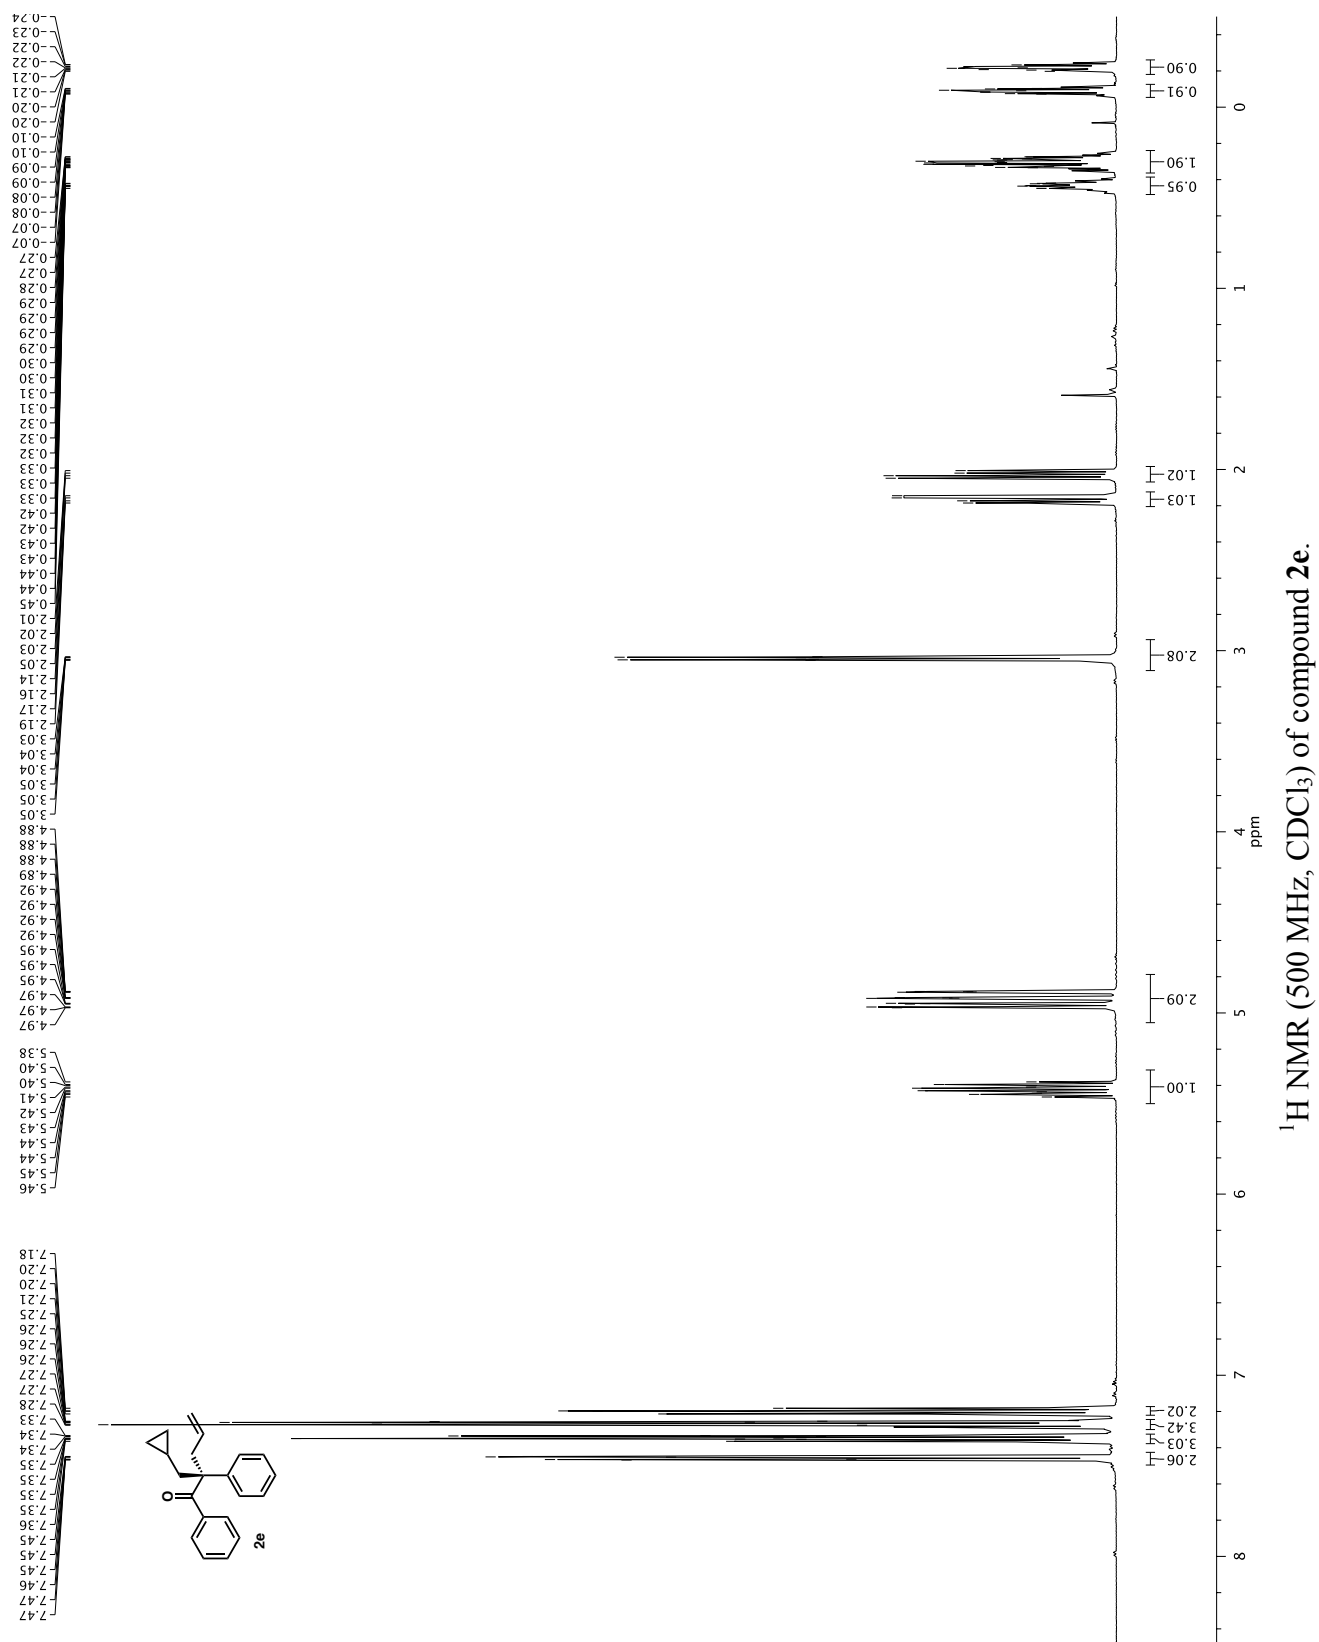

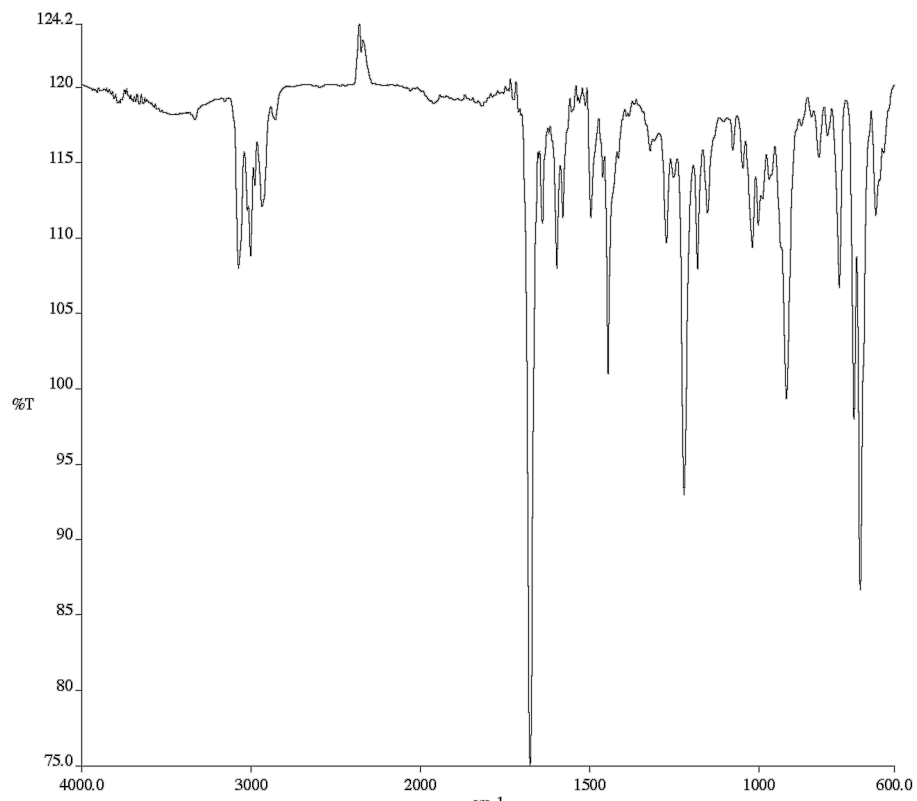

202.87

1421.0  
1357.7  
1317.9  
1288.05  
1288.06  
1266.88

1185.2

58.85

40.11  
39.345.93  
4.33  
4.21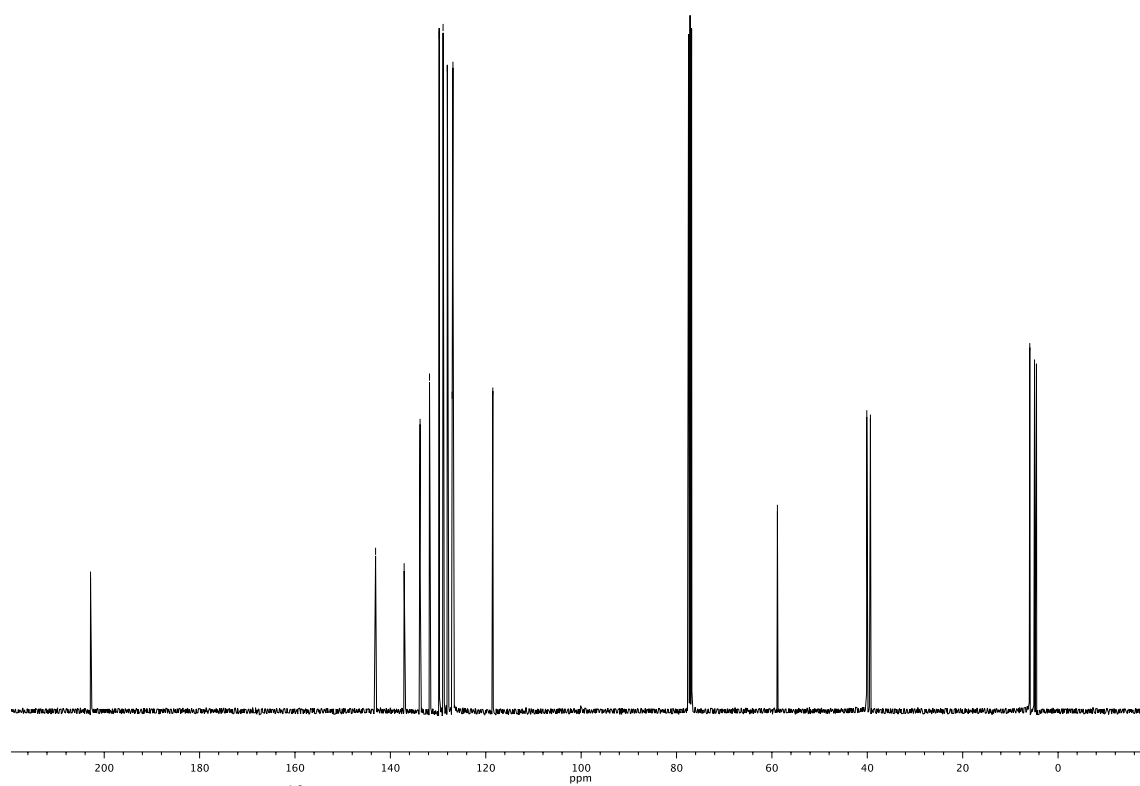 $^{13}\text{C}$  NMR (100 MHz,  $\text{CDCl}_3$ ) of compound **2e**.

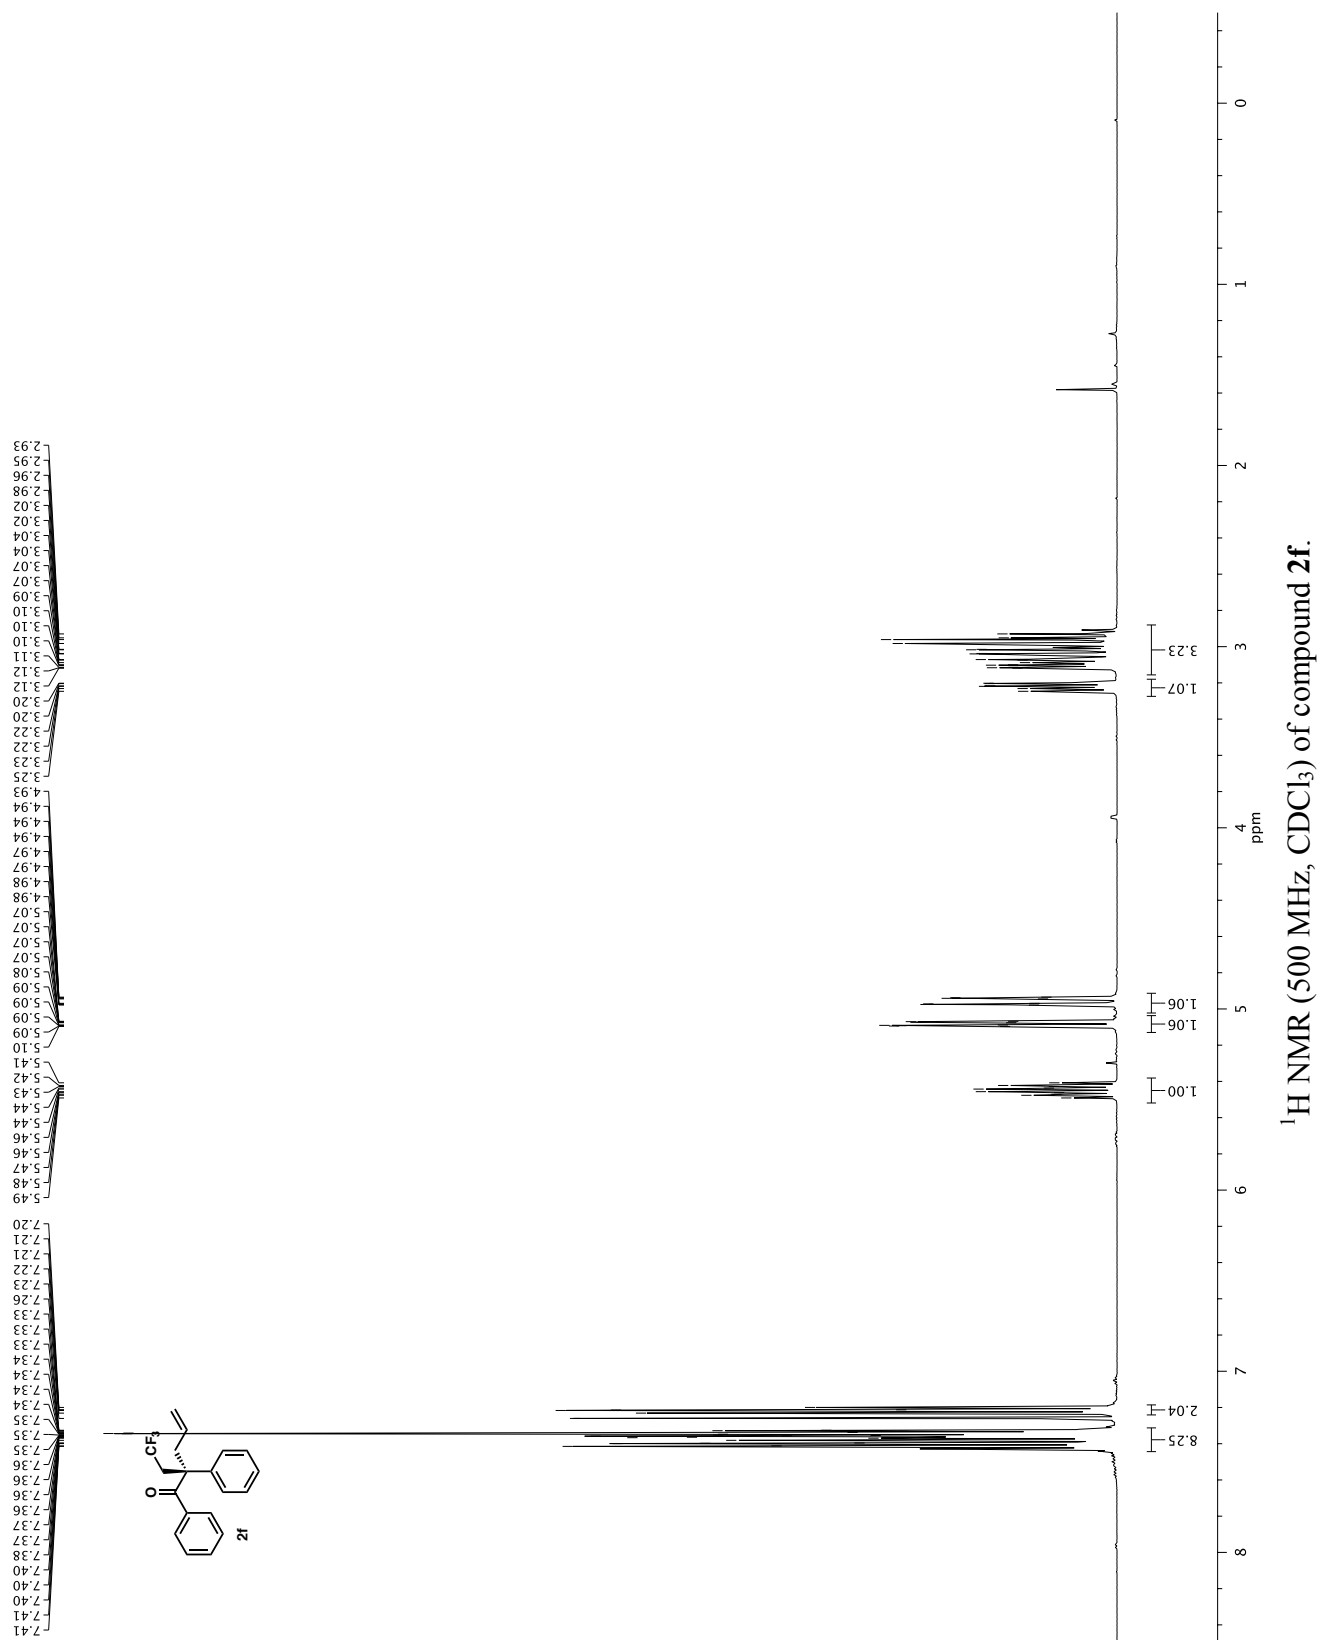

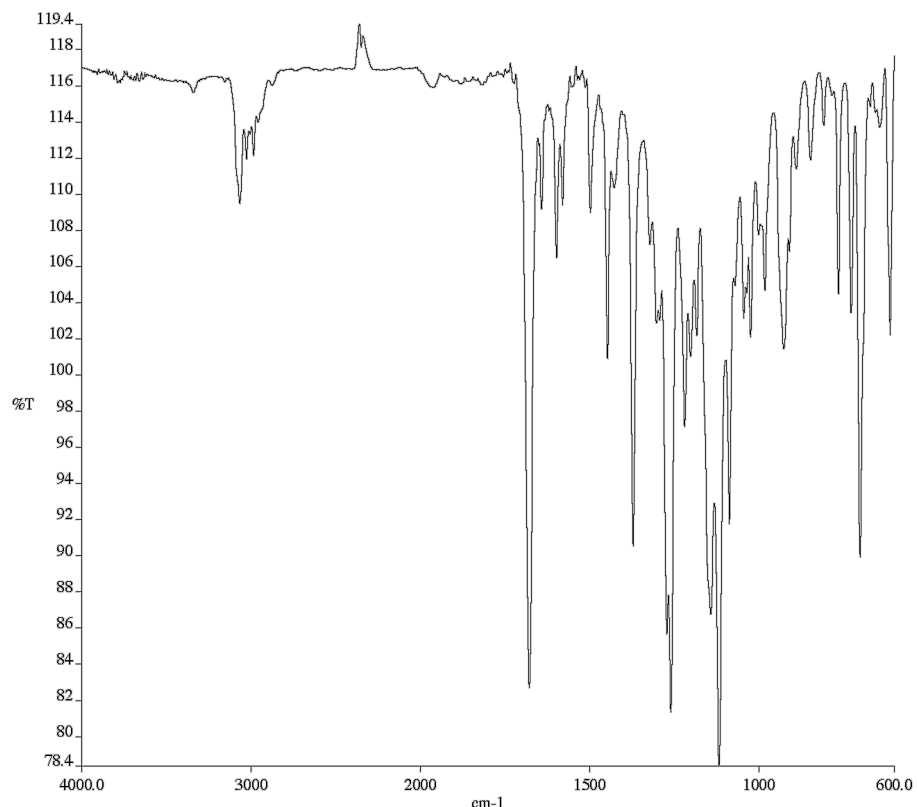Infrared spectrum (Thin Film, NaCl) of compound **2f**.

— 200.37

1399.83  
1366.35  
1337.88  
1309.94  
1299.61  
1289.41  
1289.29  
1288.24  
1288.10  
1288.04  
1267.75  
1255.40  
1206.62

55.52  
55.49  
55.47

39.46  
38.92  
38.66  
38.46  
38.46  
38.45

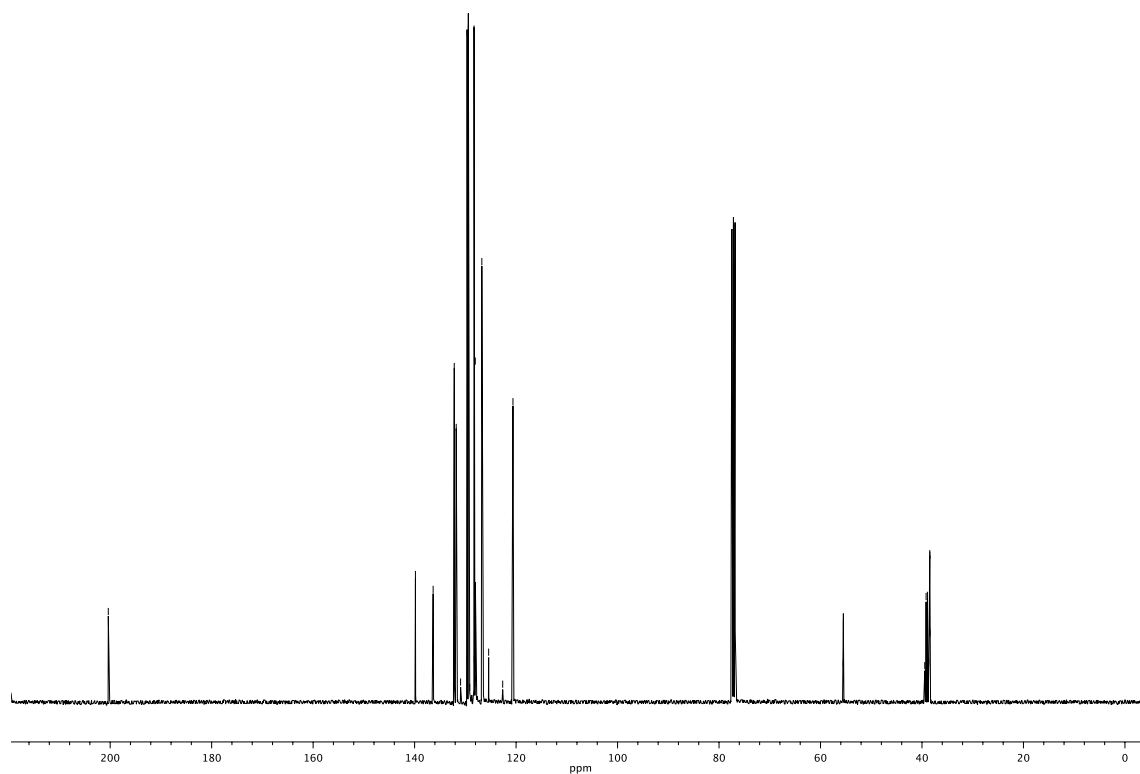<sup>13</sup>C NMR (100 MHz, CDCl<sub>3</sub>) of compound **2f**.

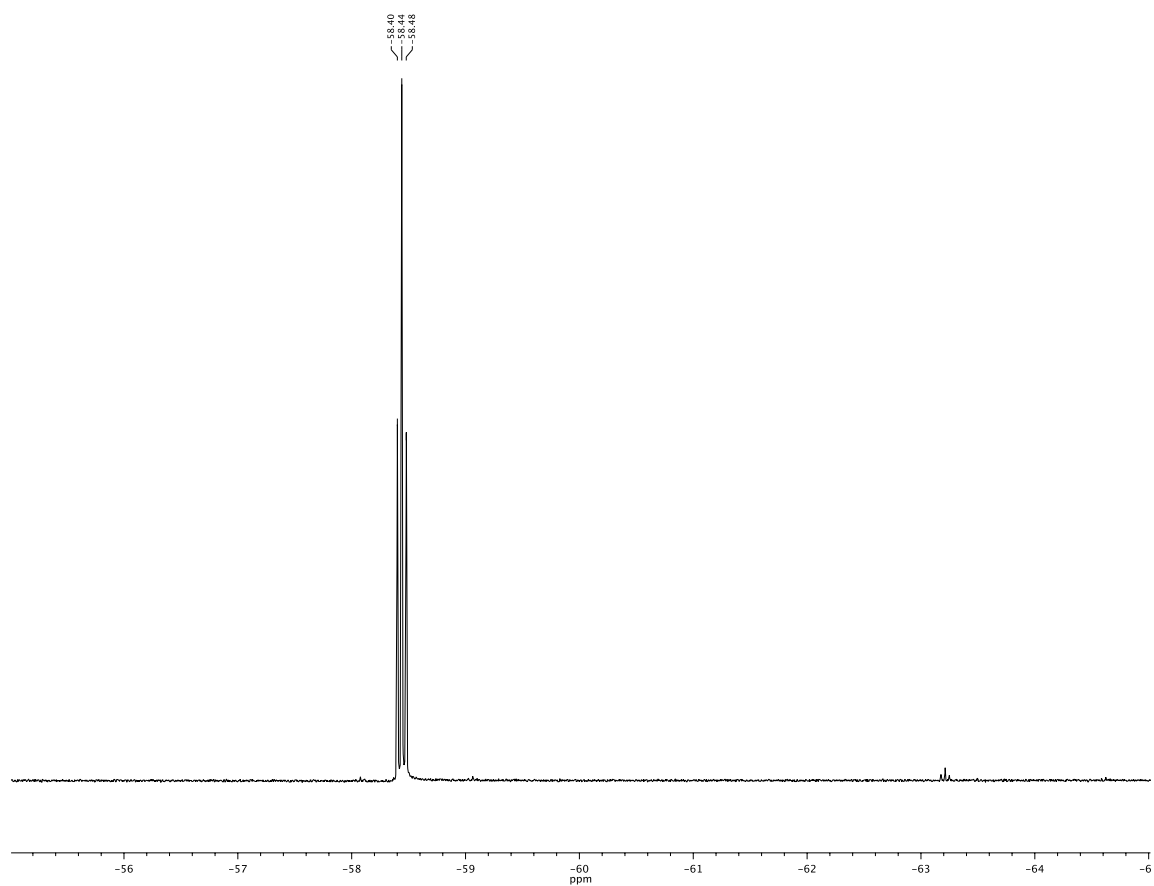

$^{19}\text{F}$  NMR (282 MHz,  $\text{CDCl}_3$ ) of compound **2f**.

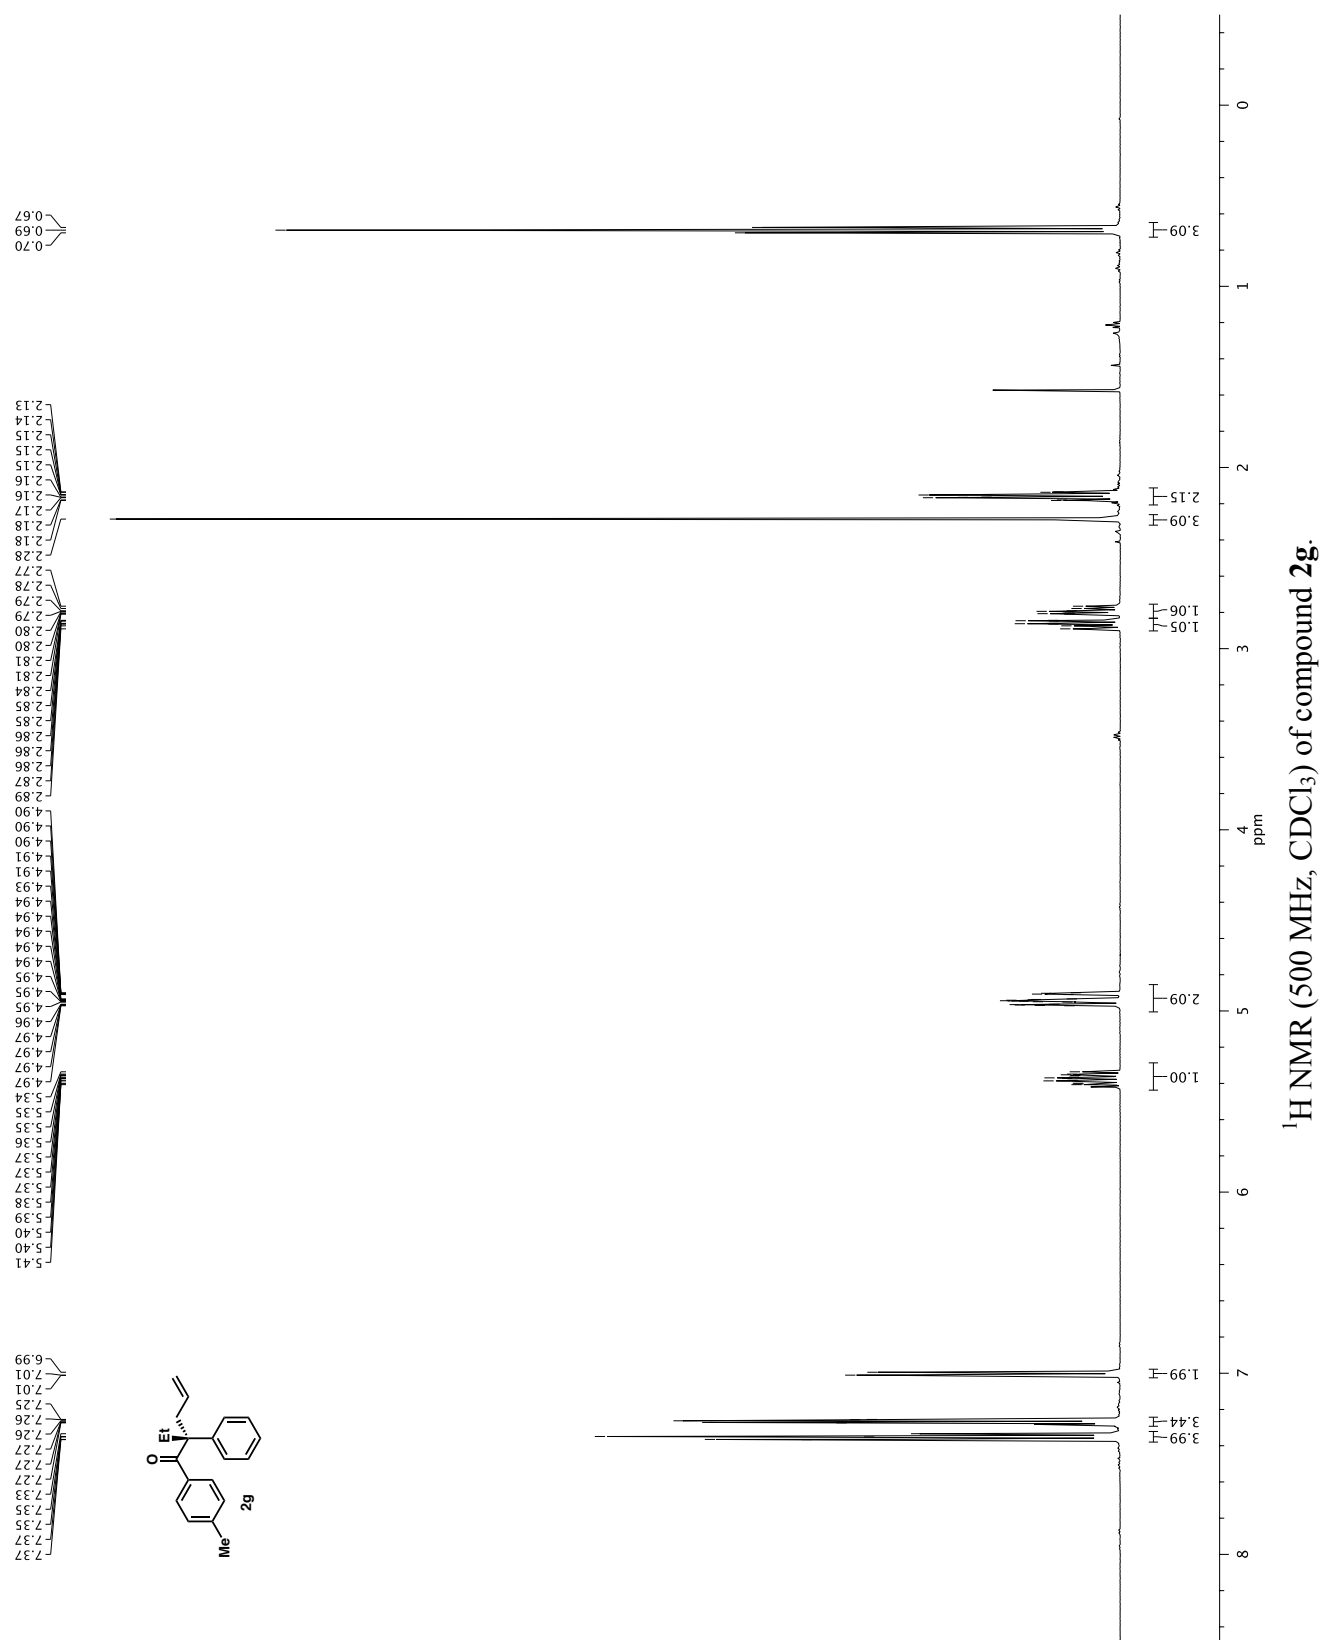

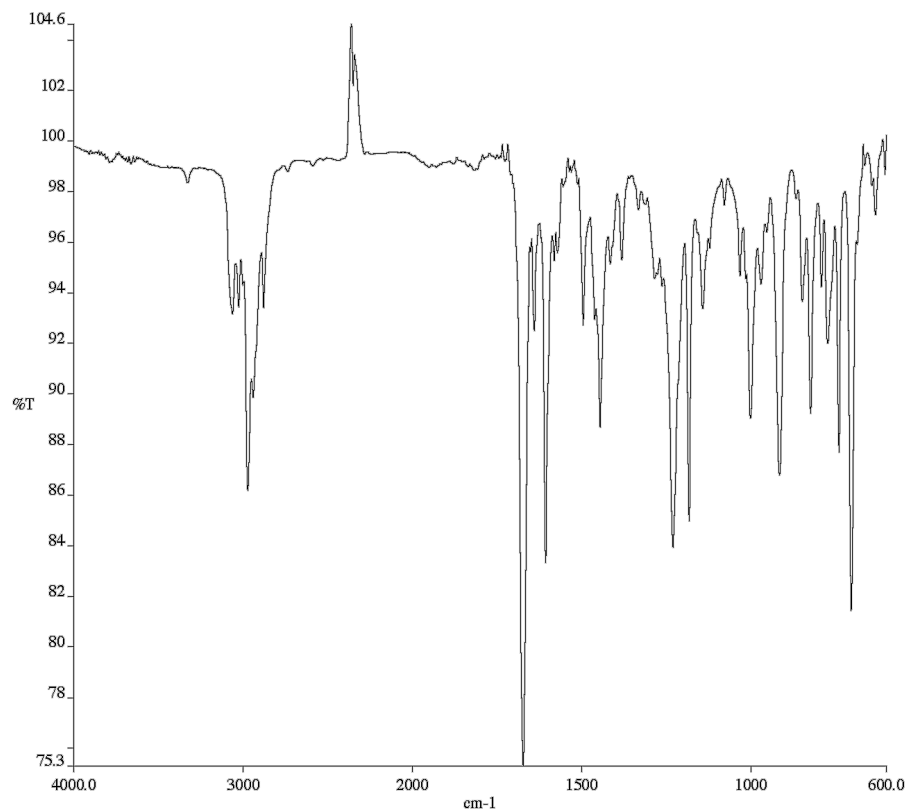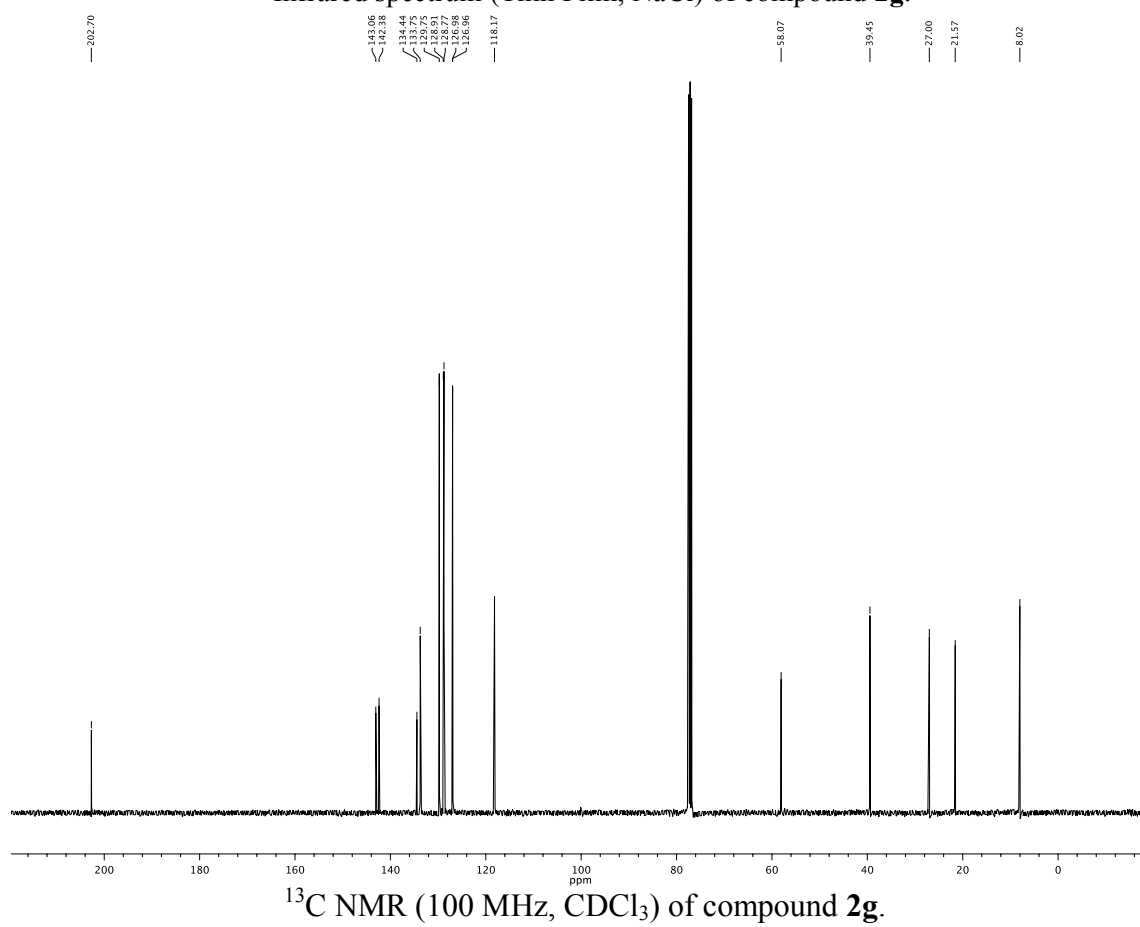

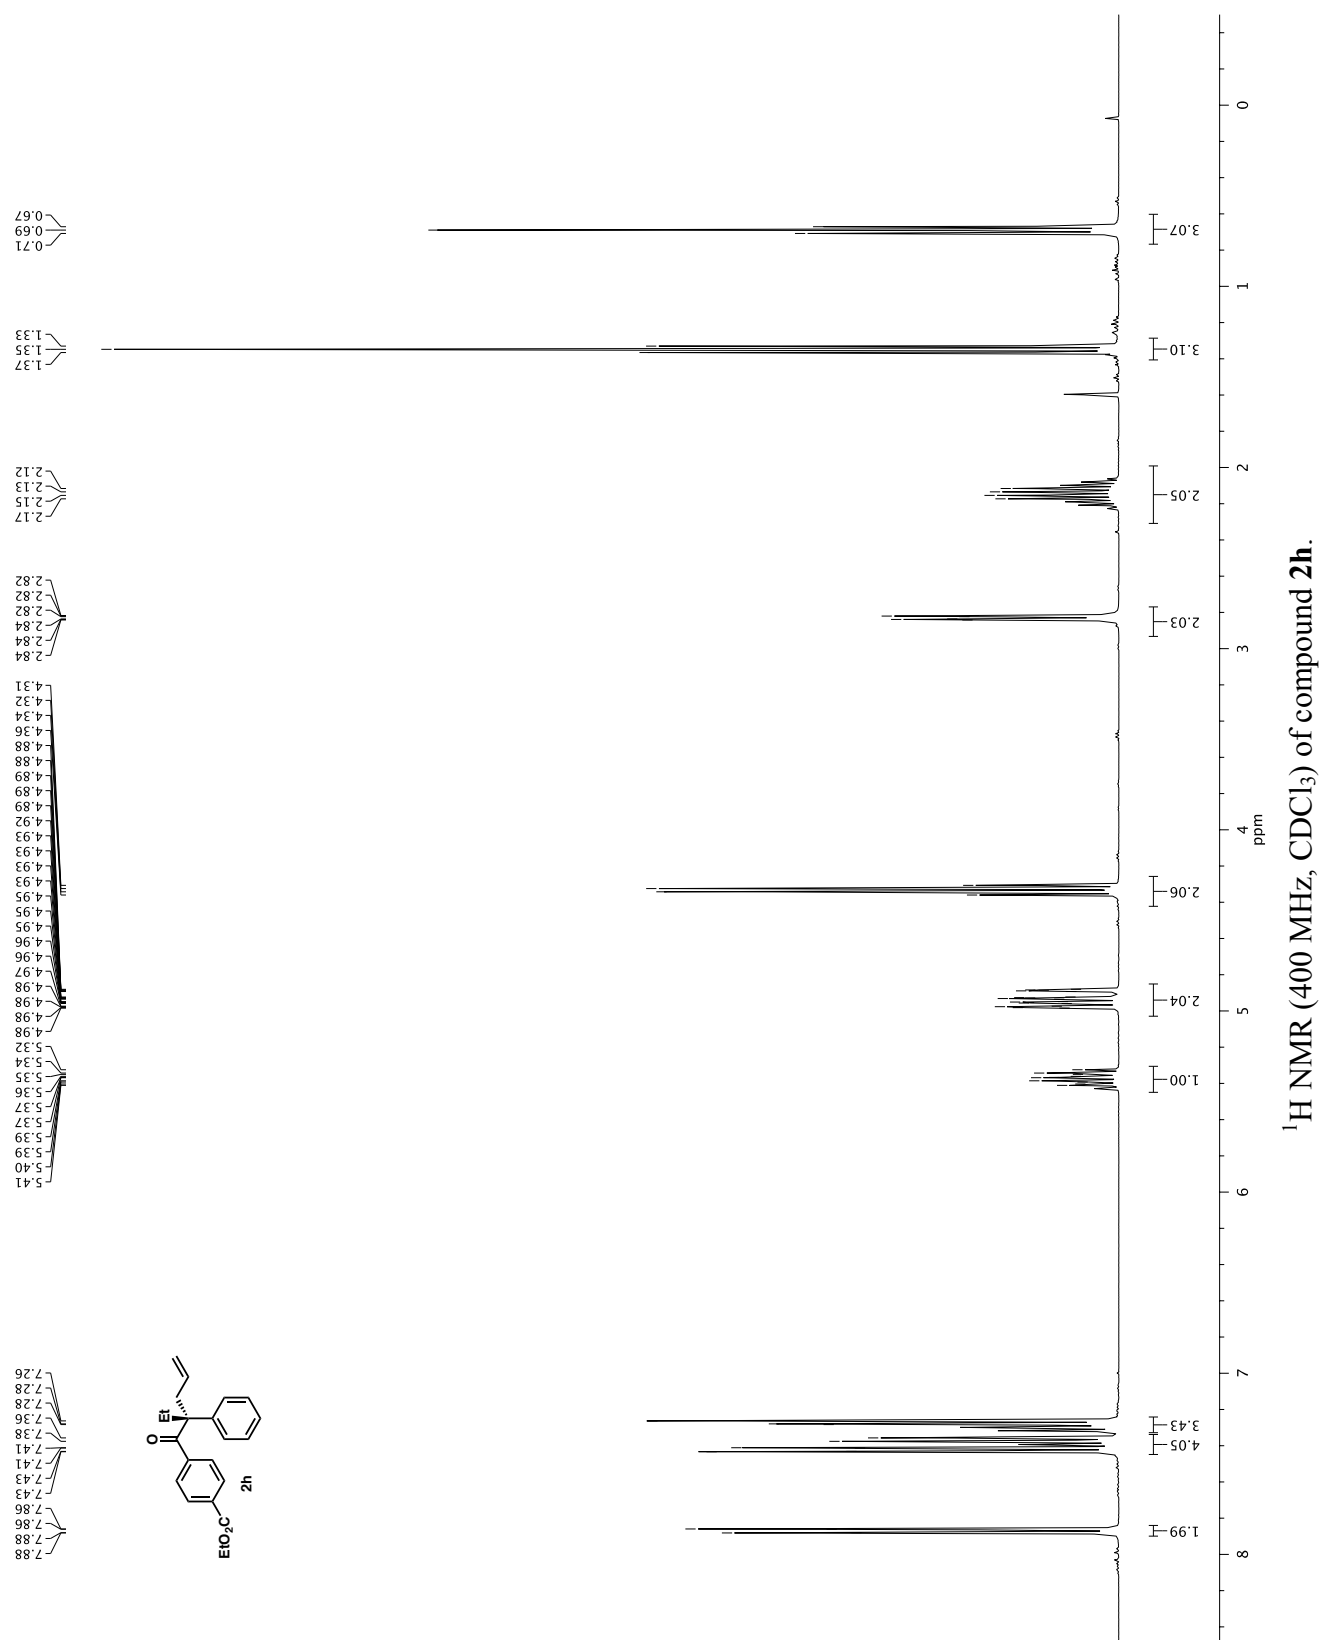



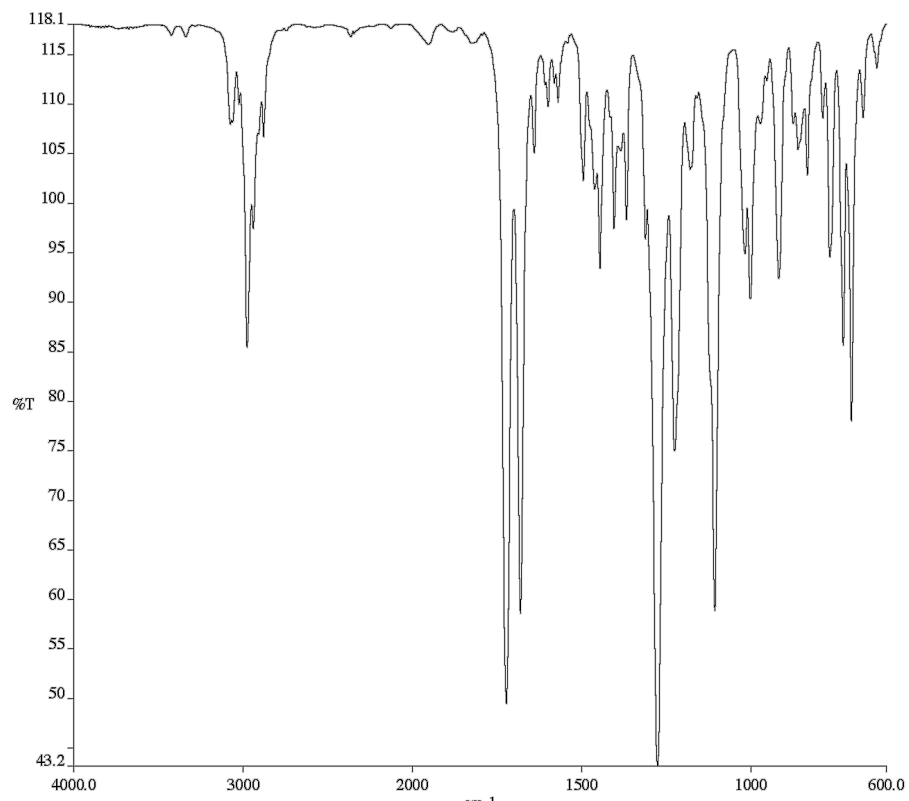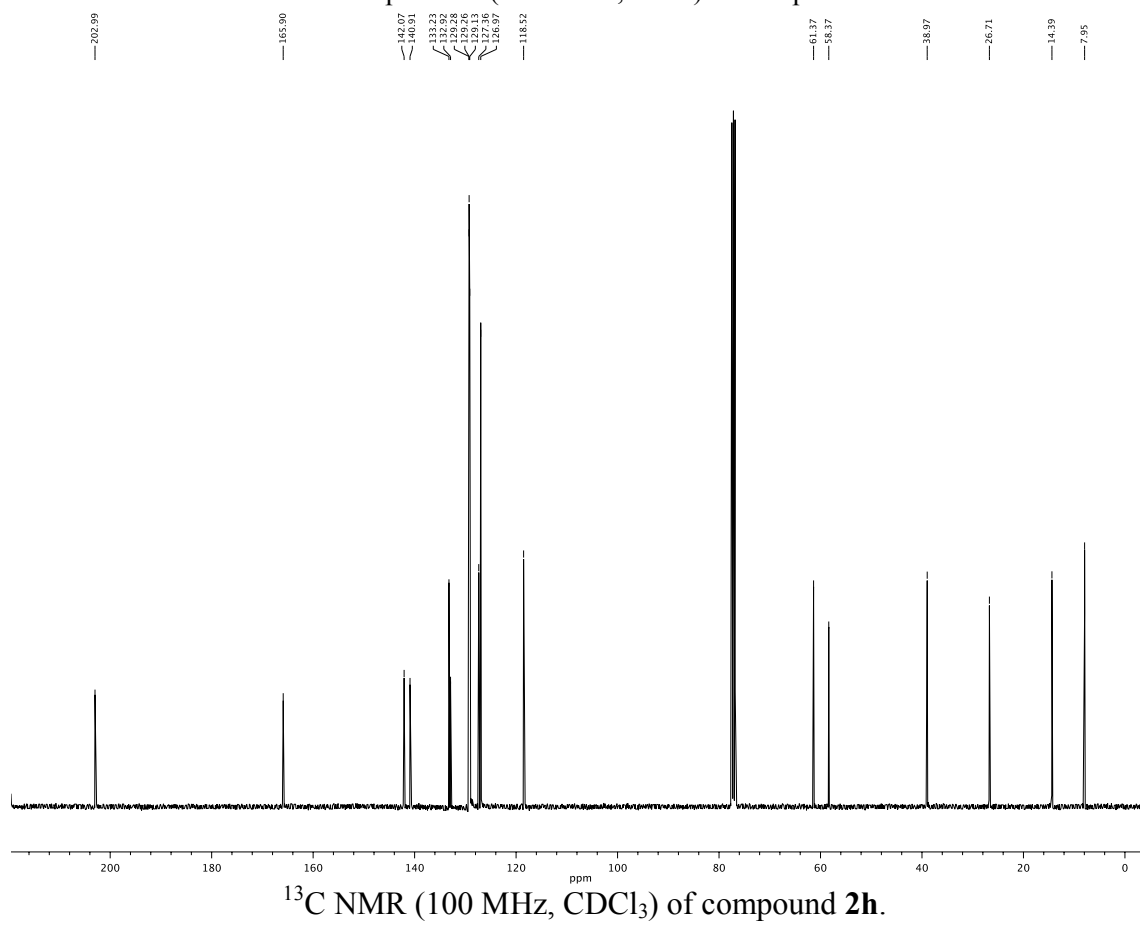

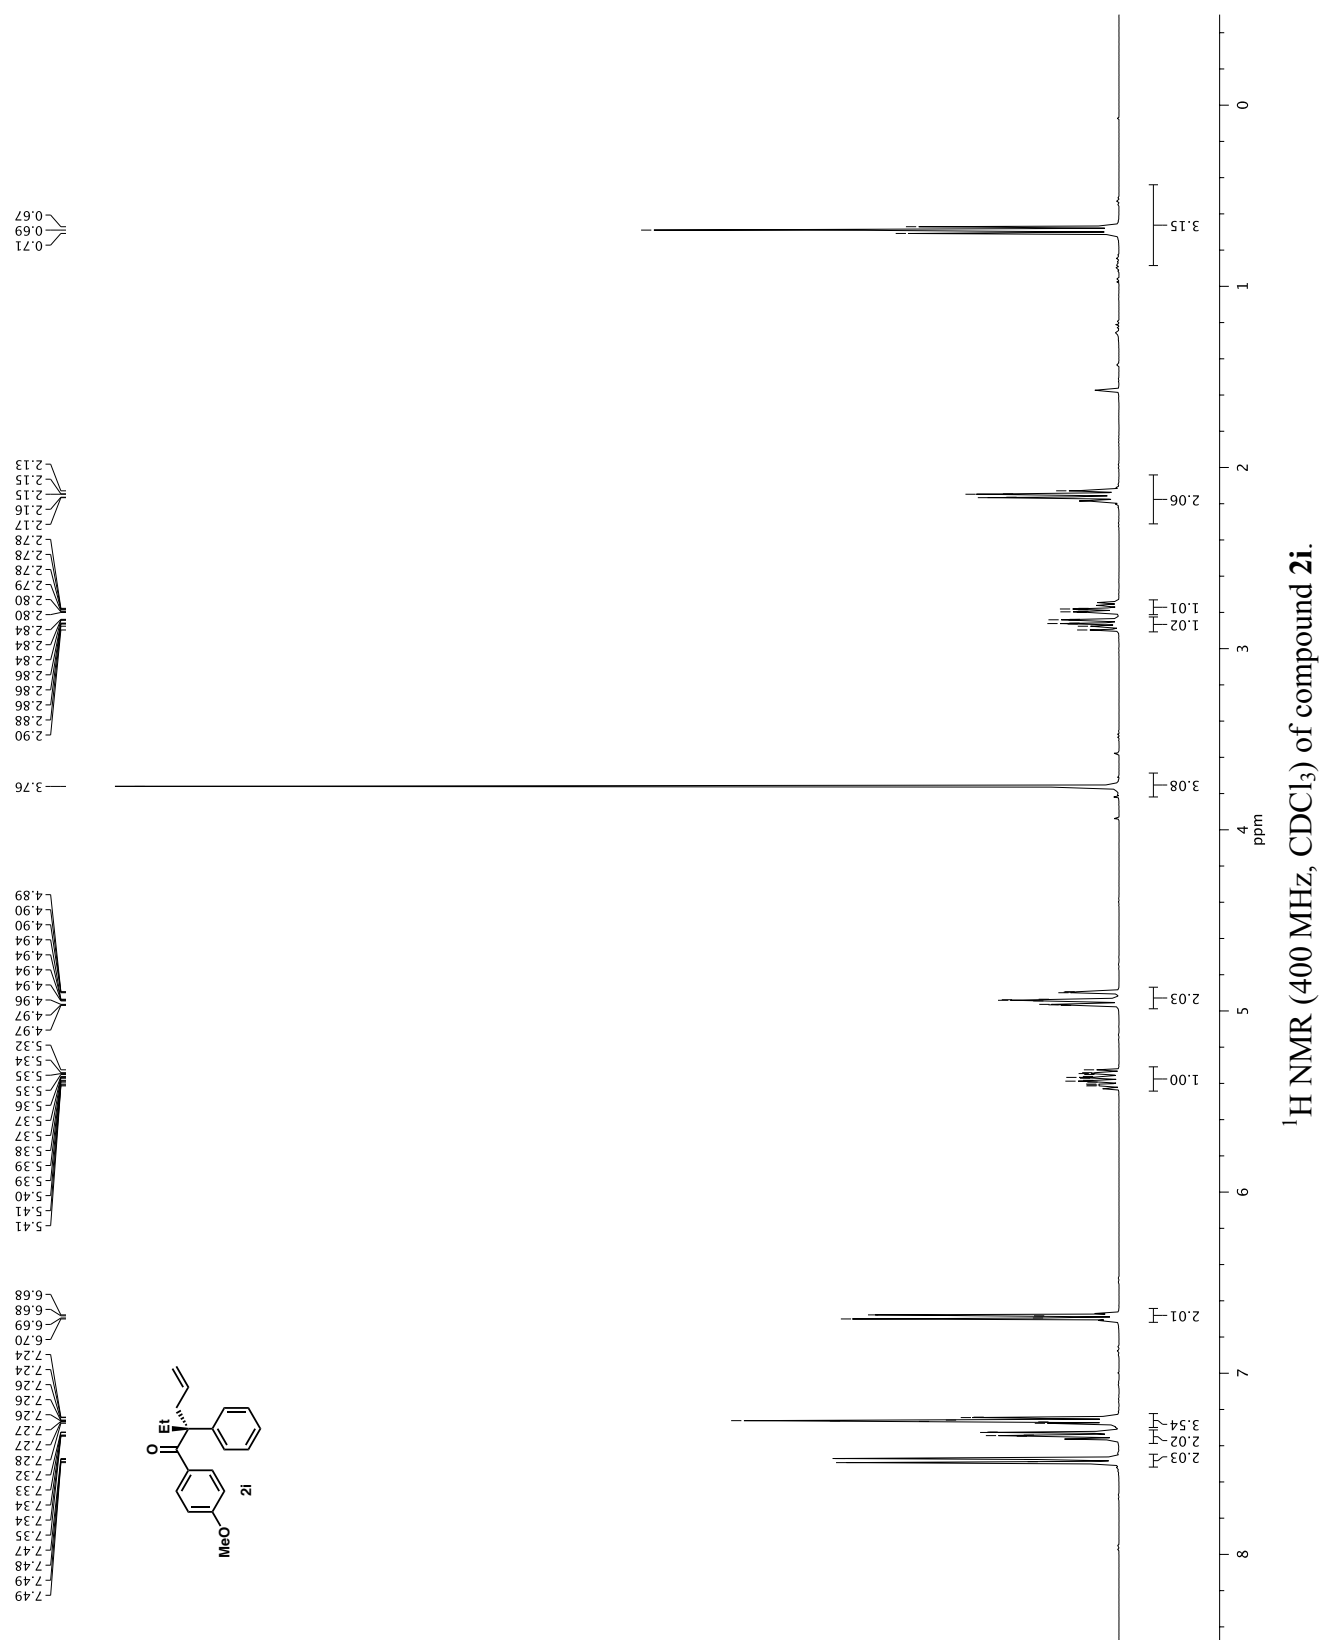

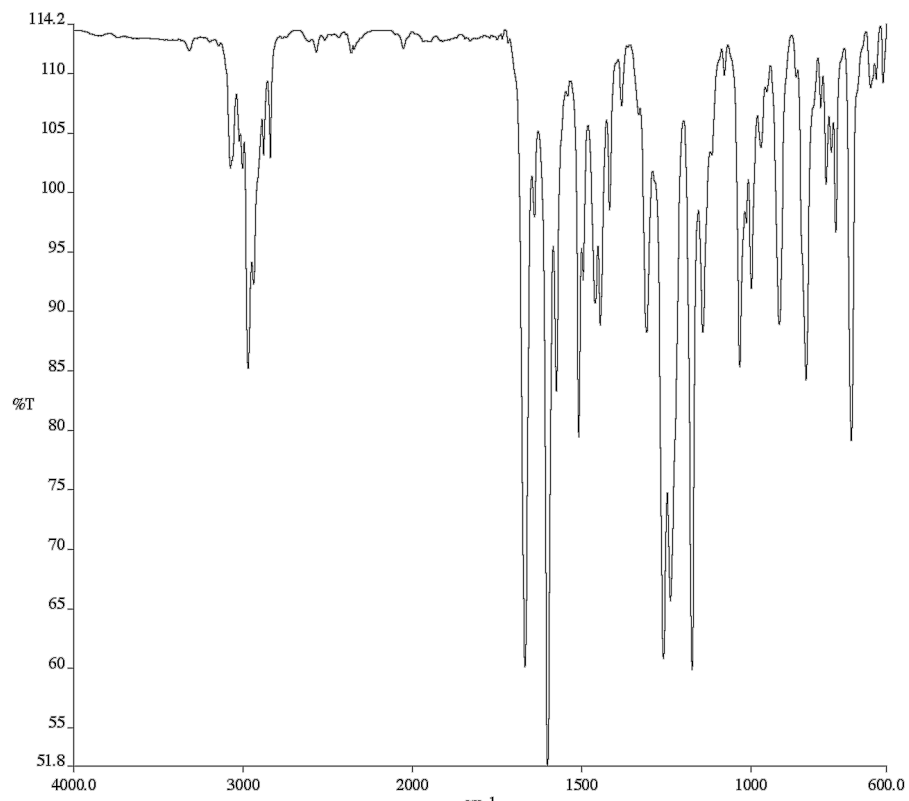Infrared spectrum (Thin Film, NaCl) of compound **2i**.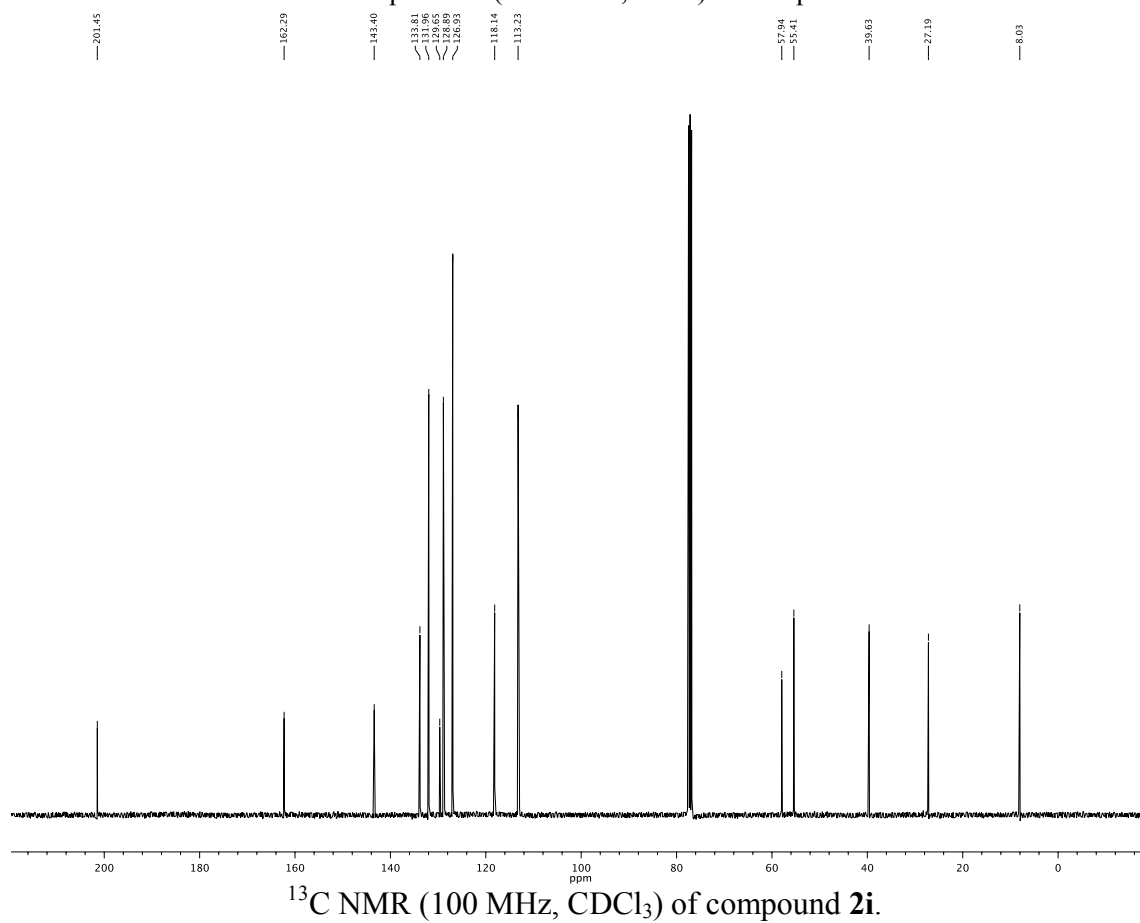<sup>13</sup>C NMR (100 MHz, CDCl<sub>3</sub>) of compound **2i**.

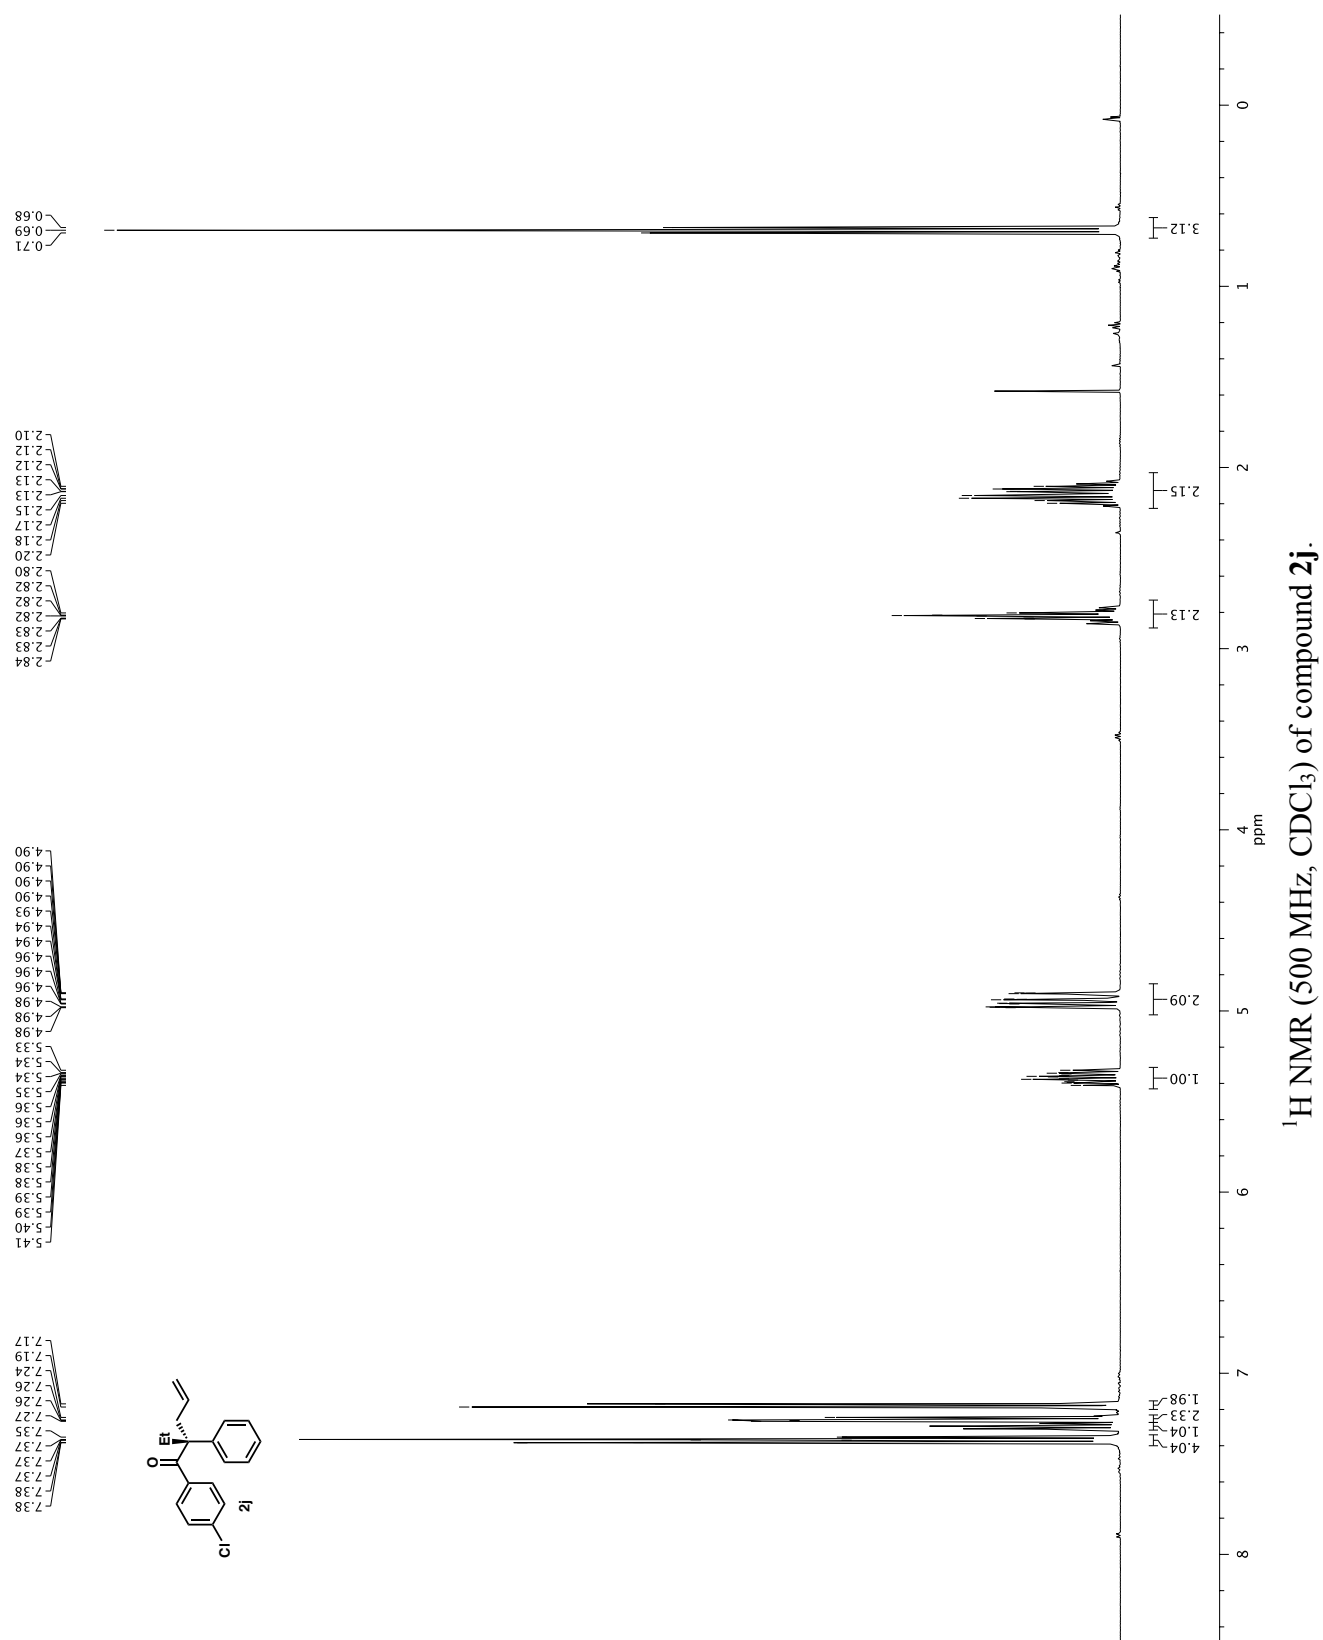

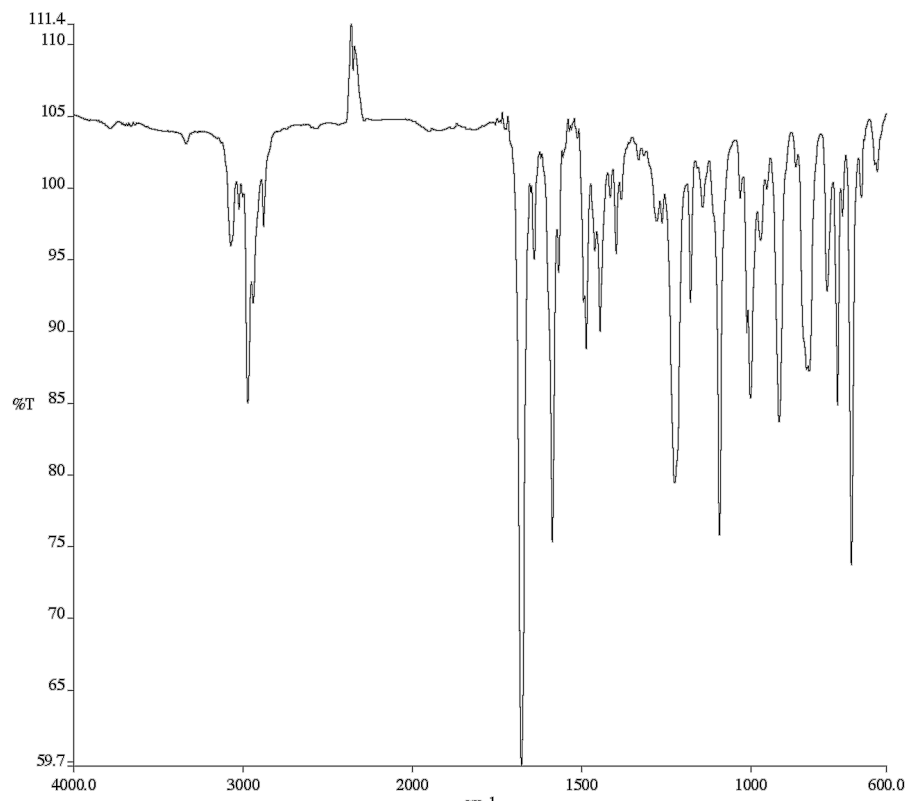Infrared spectrum (Thin Film, NaCl) of compound **2j**.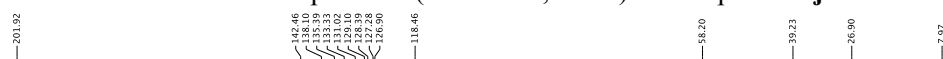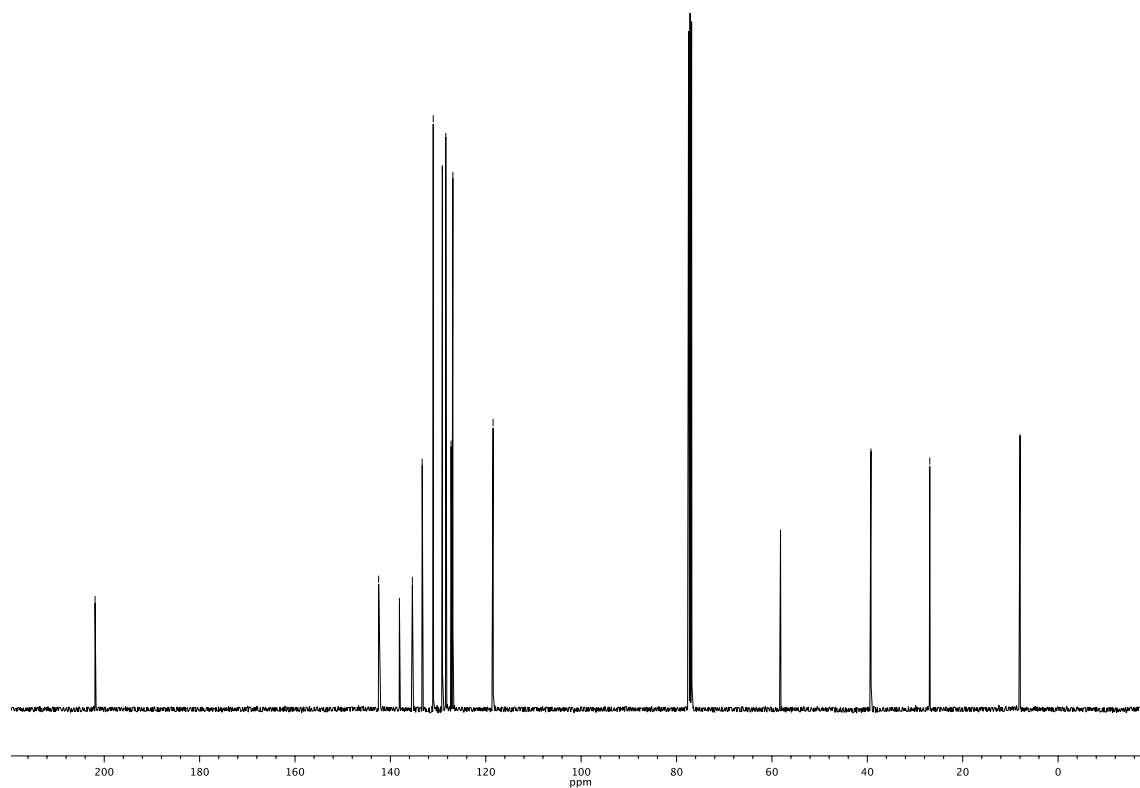<sup>13</sup>C NMR (100 MHz, CDCl<sub>3</sub>) of compound **2j**.

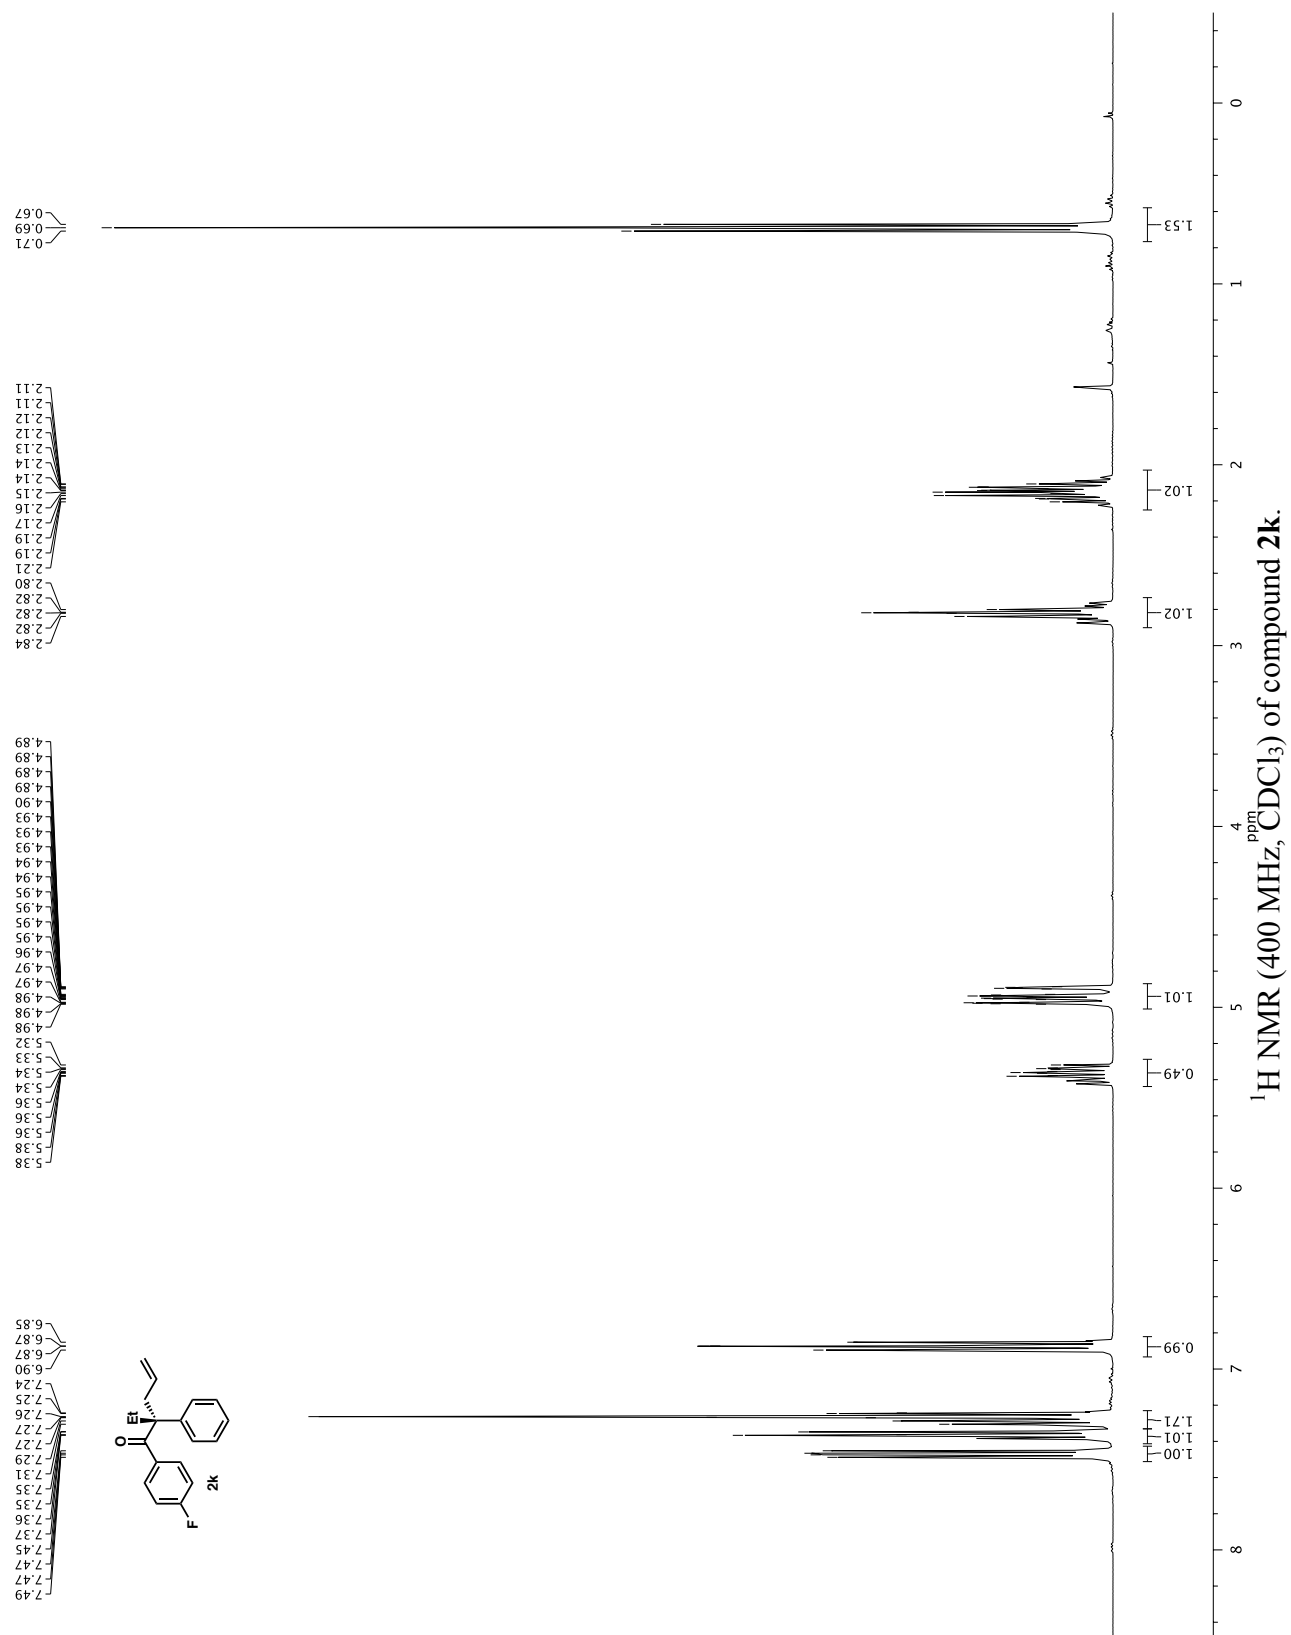

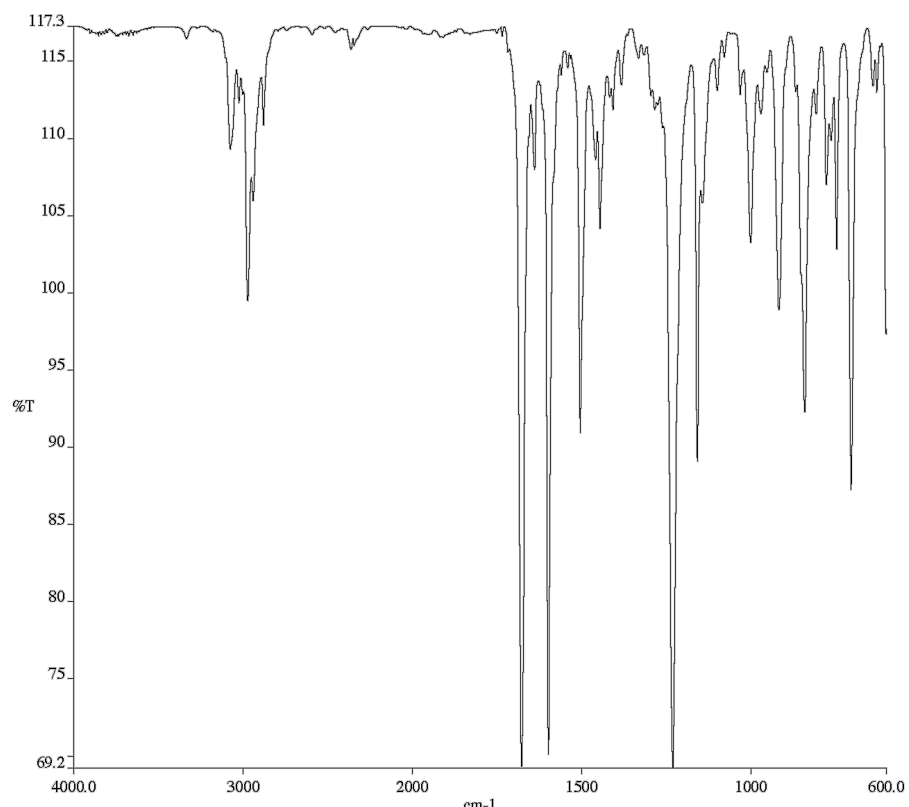

— 201.55 — 165.93 — 163.41 — 142.66 — 132.42 — 131.38 — 131.22 — 129.07 — 127.22 — 126.90 — 118.40 — 115.02 — 58.13 — 39.34 — 26.99 — 7.97

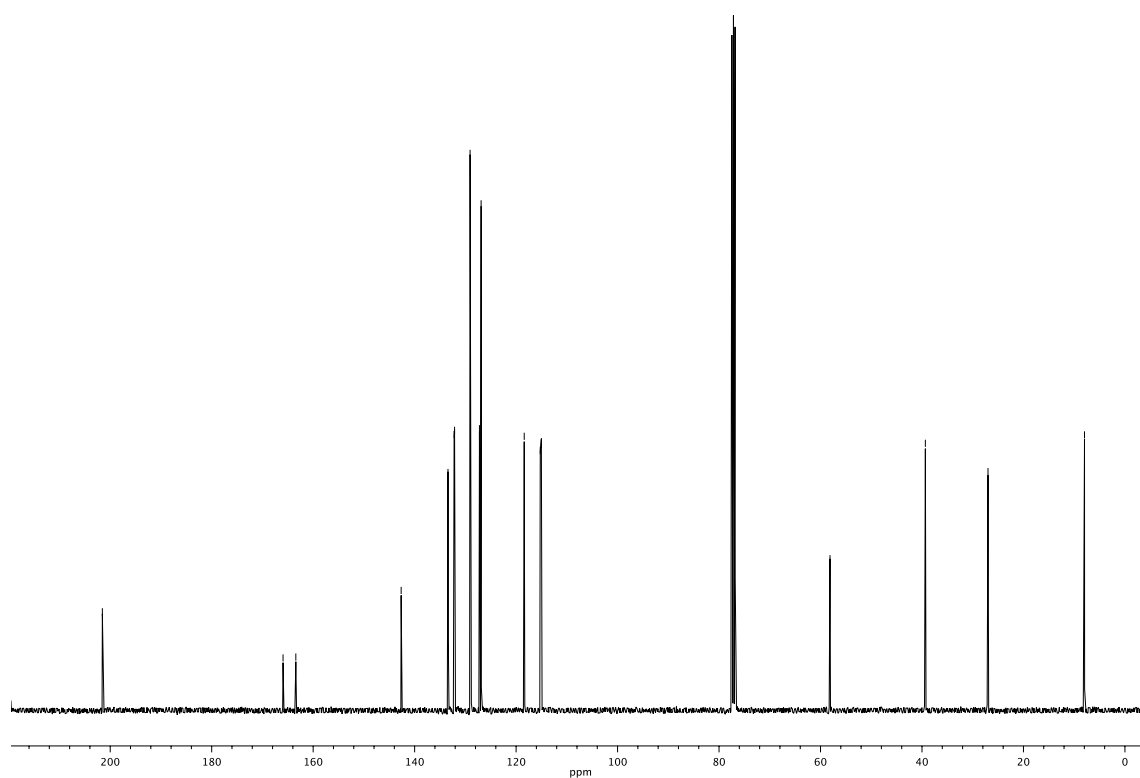

$^{13}\text{C}$  NMR (100 MHz,  $\text{CDCl}_3$ ) of compound **2k**.

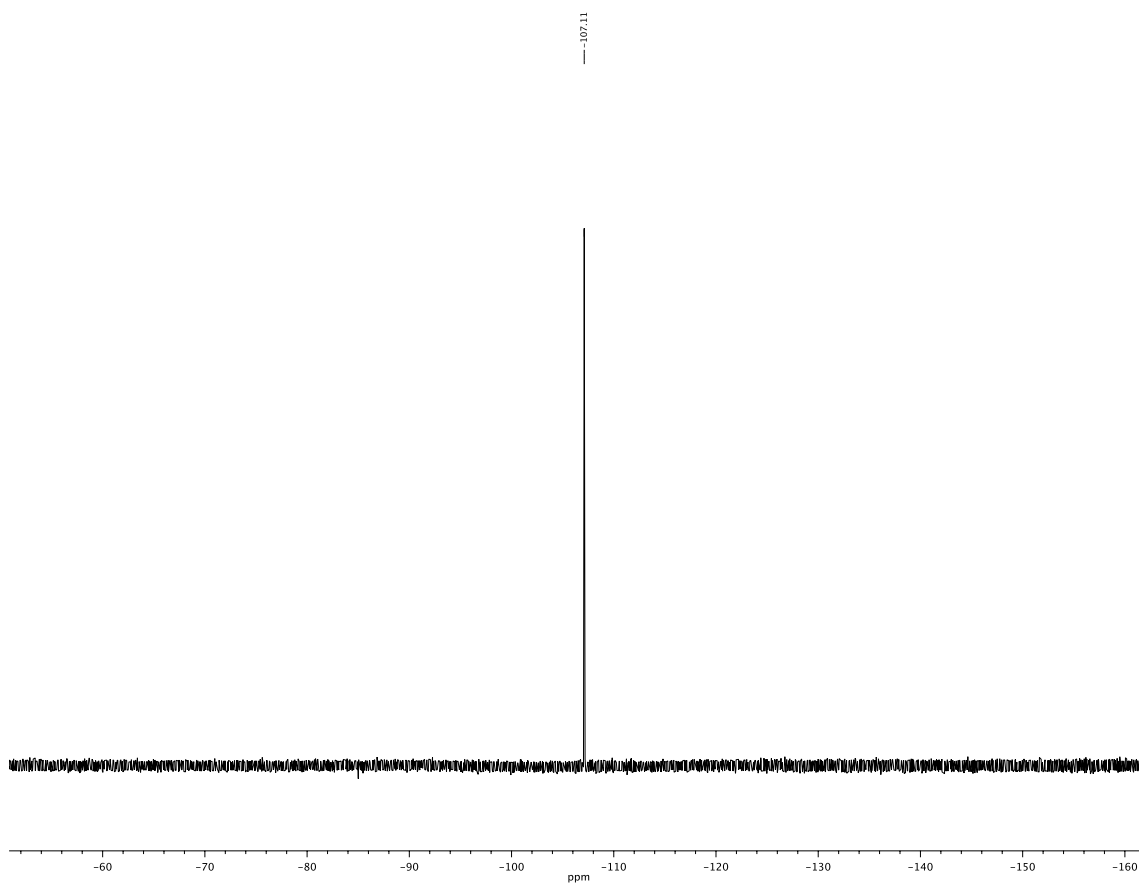

$^{19}\text{F}$  NMR (282 MHz,  $\text{CDCl}_3$ ) of compound **2k**.



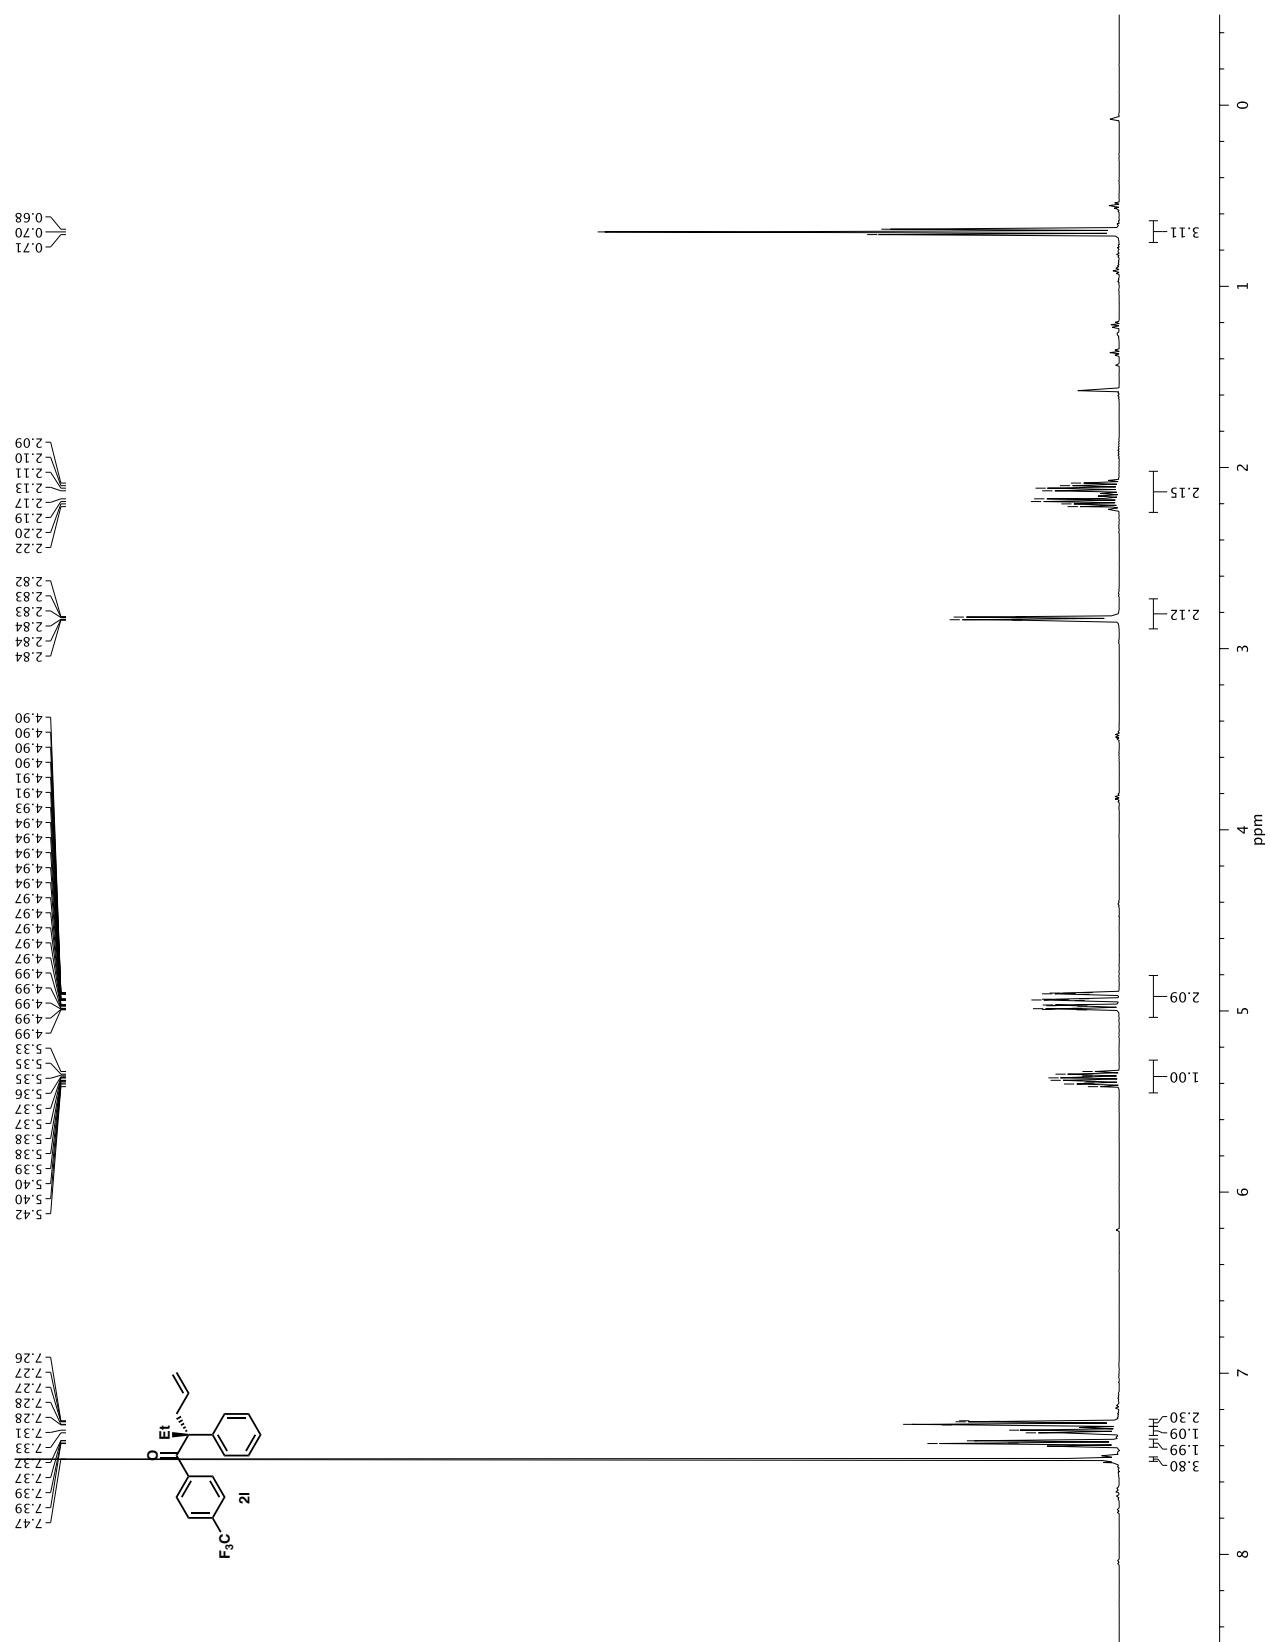

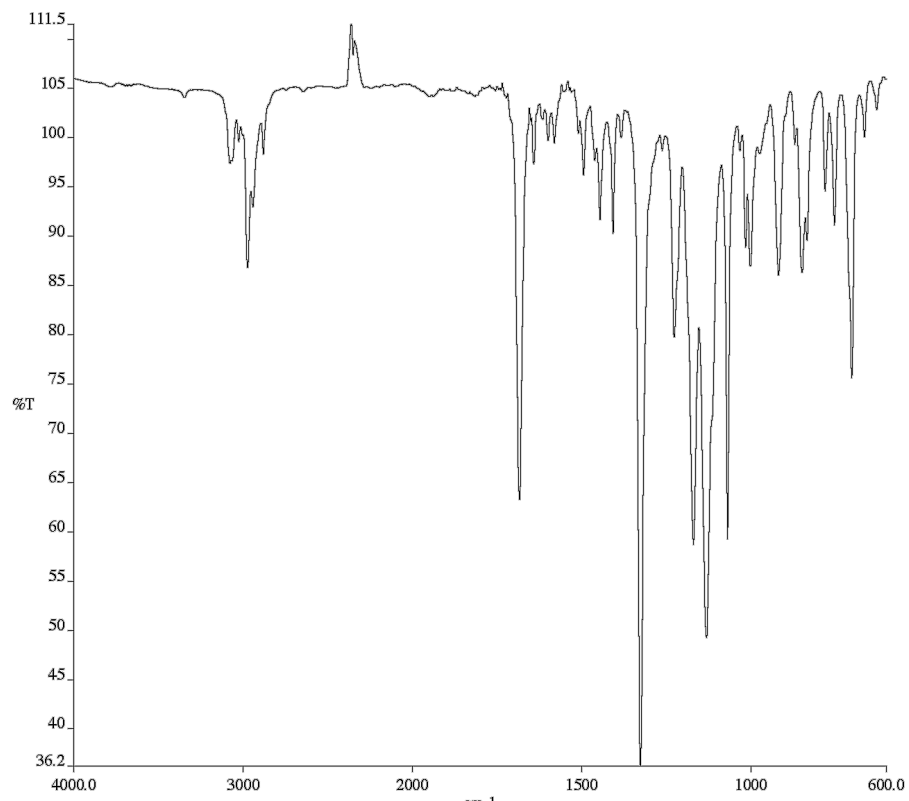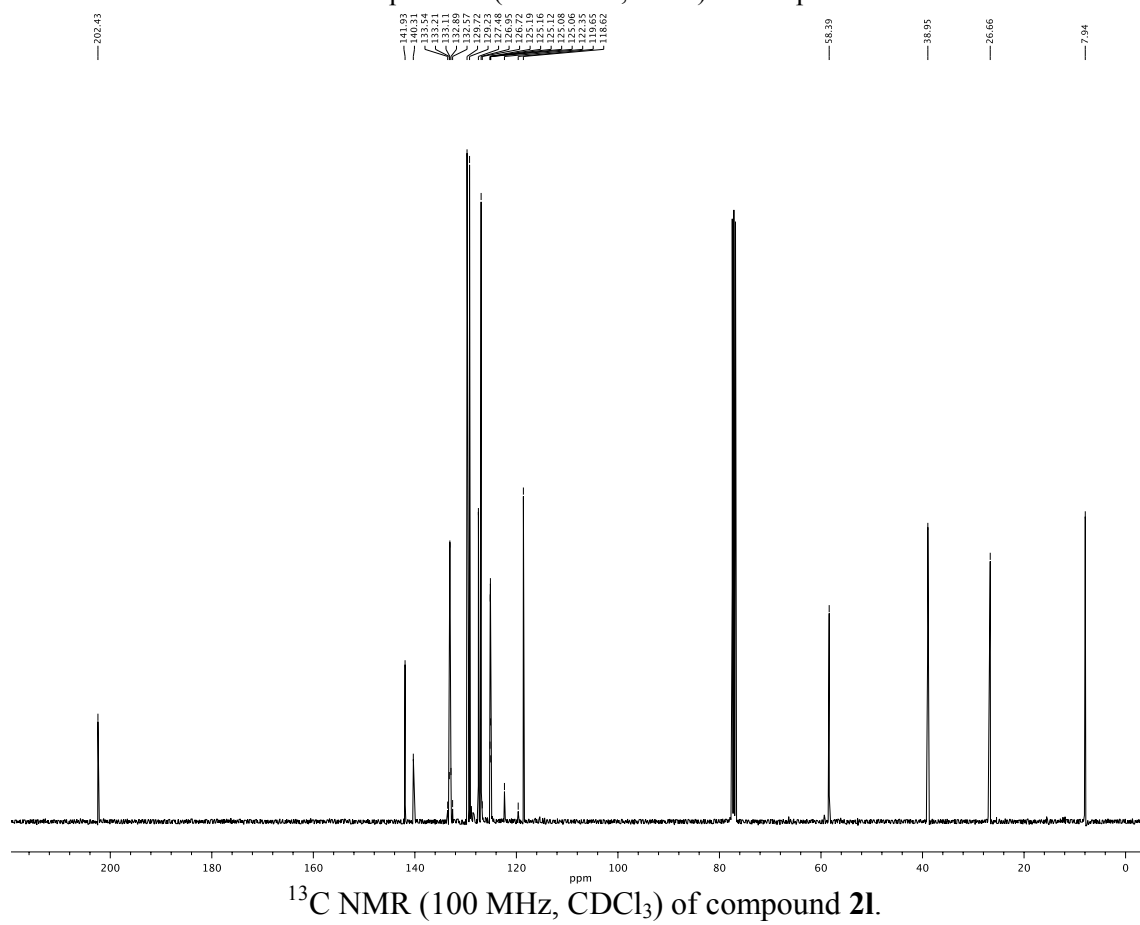

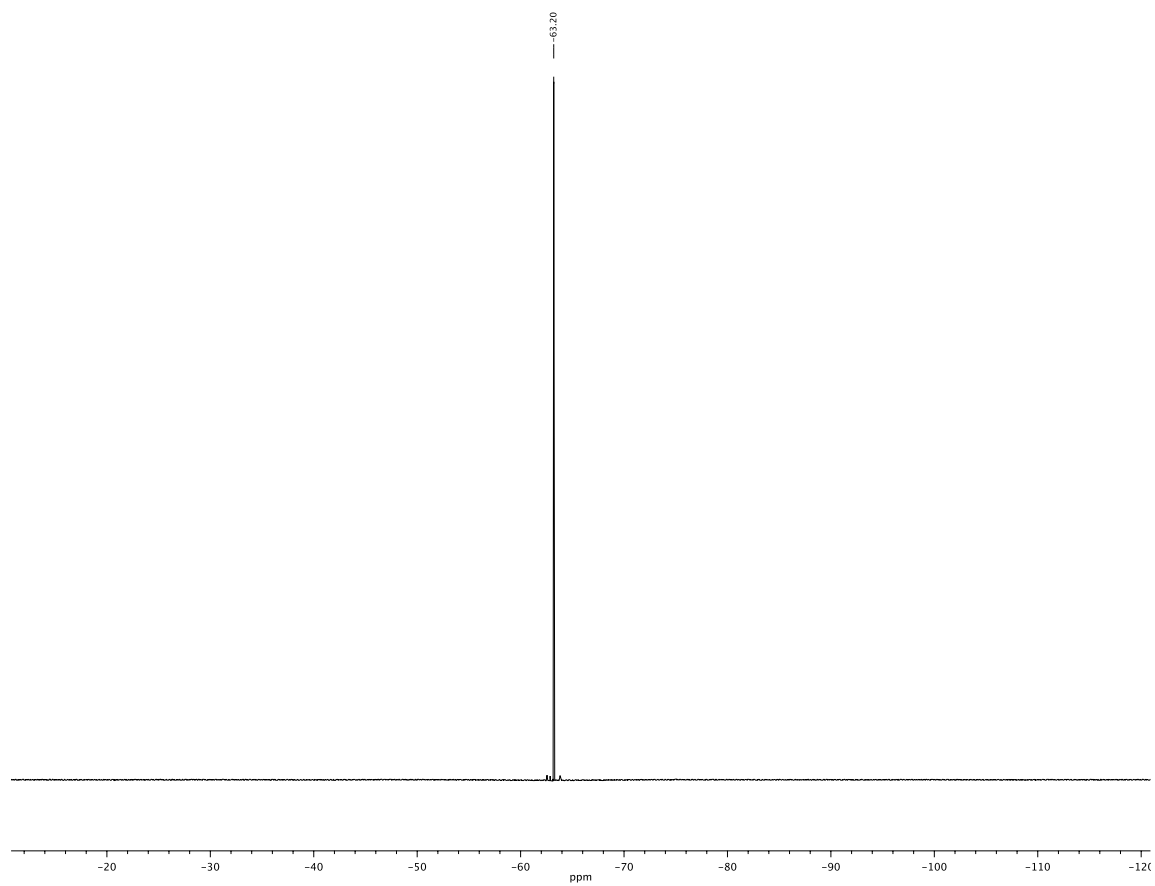

$^{19}\text{F}$  NMR (282 MHz,  $\text{CDCl}_3$ ) of compound **21**.

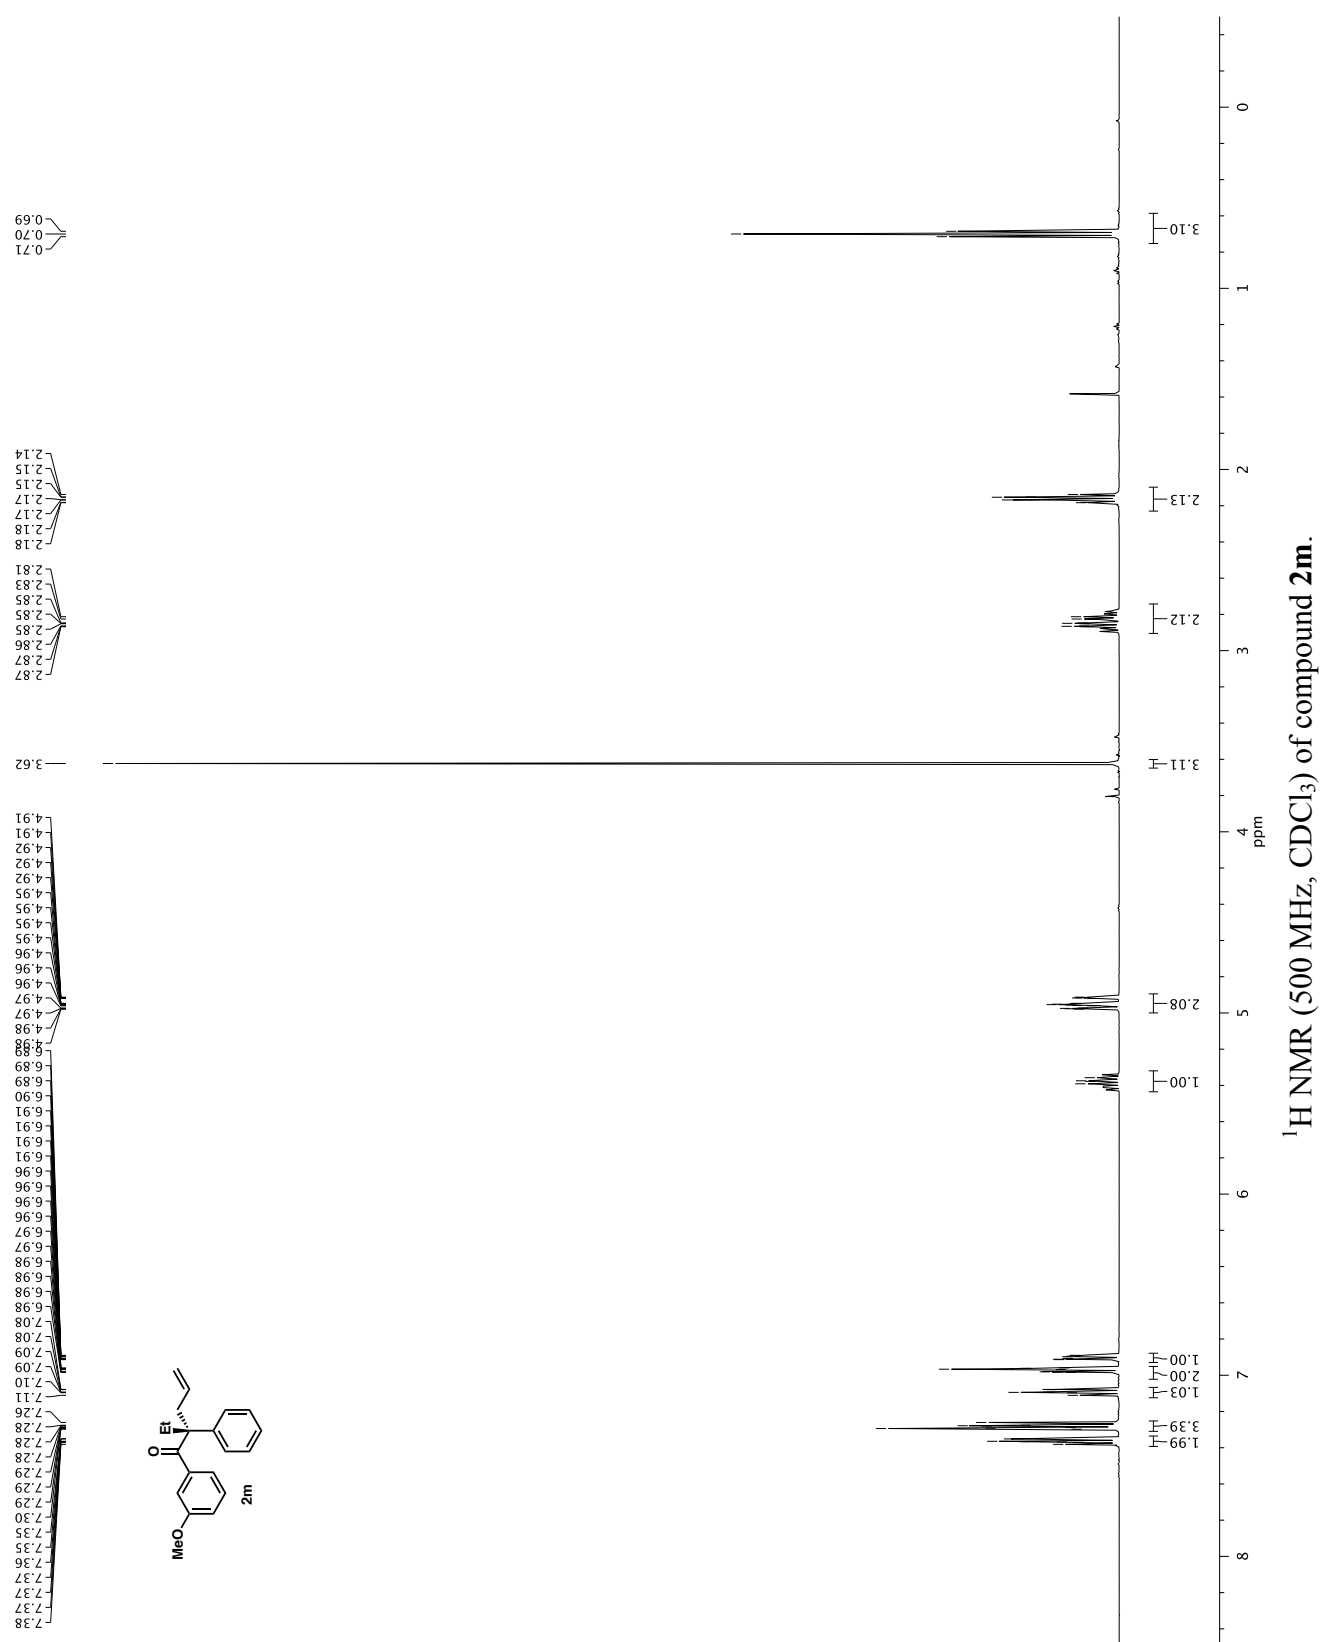

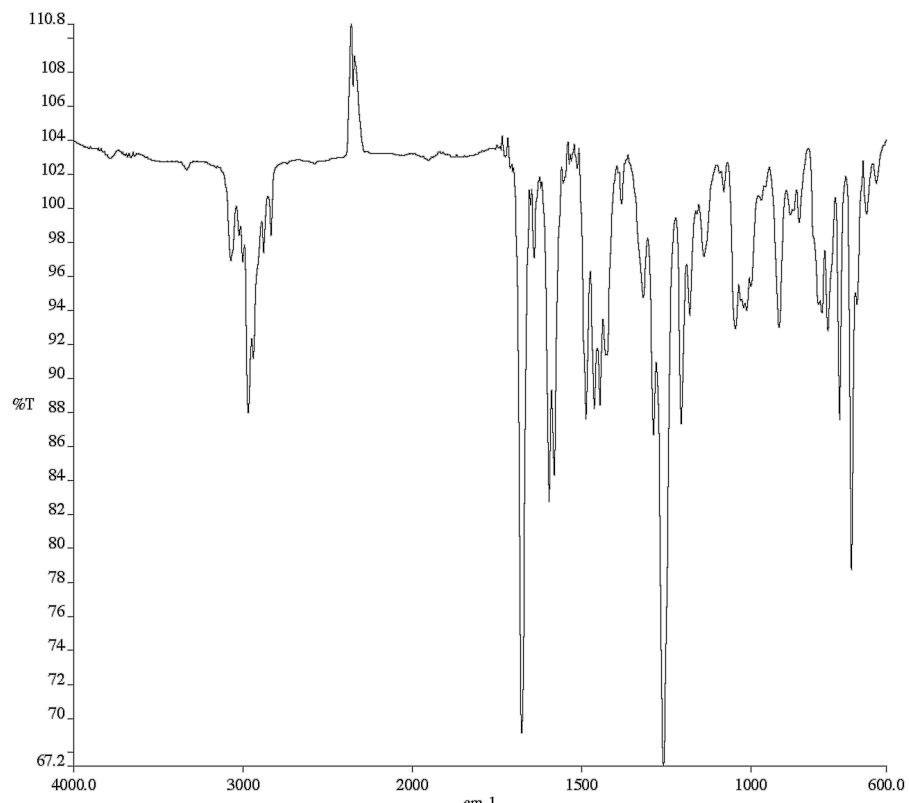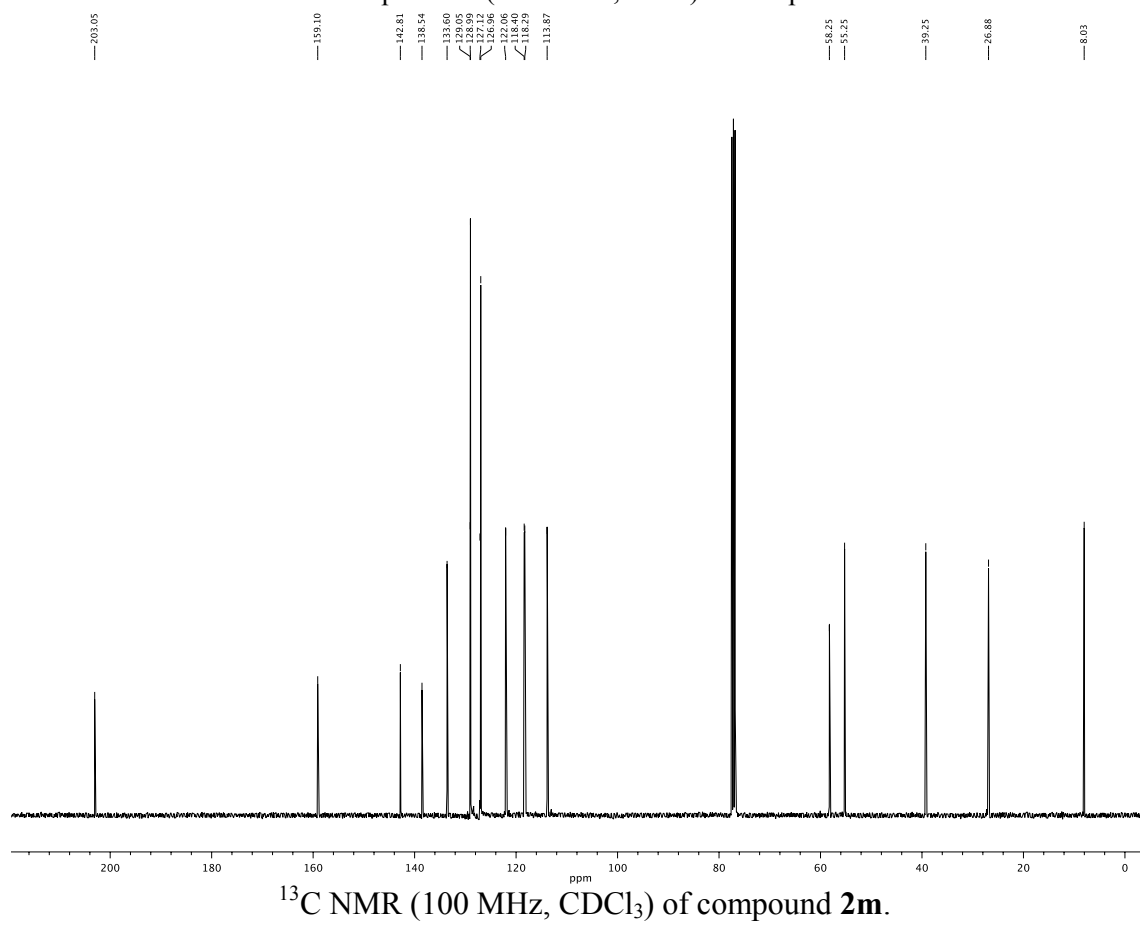



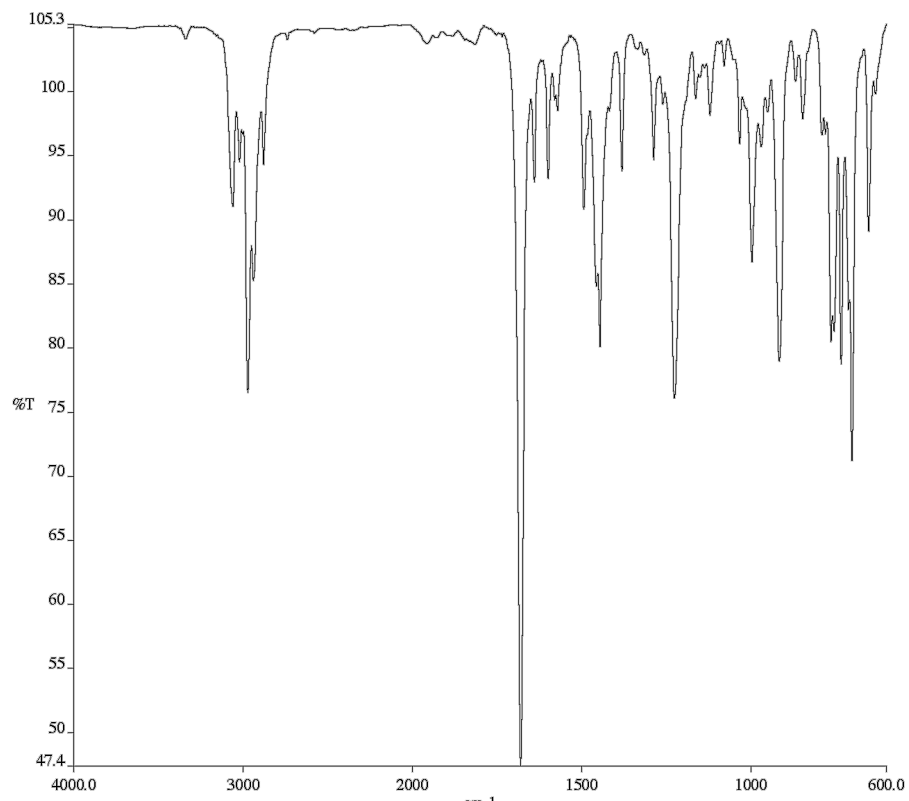Infrared spectrum (Thin Film, NaCl) of compound **2n**.

— 207.15

— 141.94  
— 138.27  
— 138.07  
— 131.91  
— 129.98  
— 127.59  
— 127.38  
— 124.65  
— 118.24

— 58.66

— 38.52

— 26.70

— 21.13

— 7.95

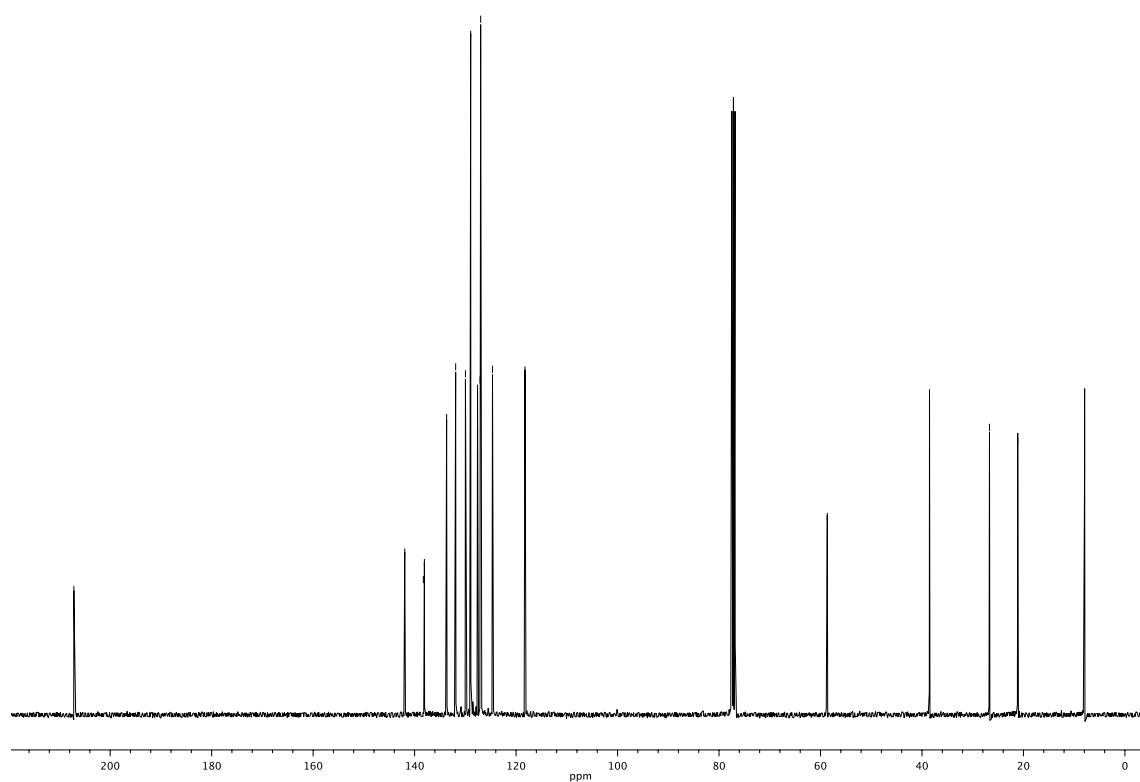<sup>13</sup>C NMR (100 MHz, CDCl<sub>3</sub>) of compound **2n**.

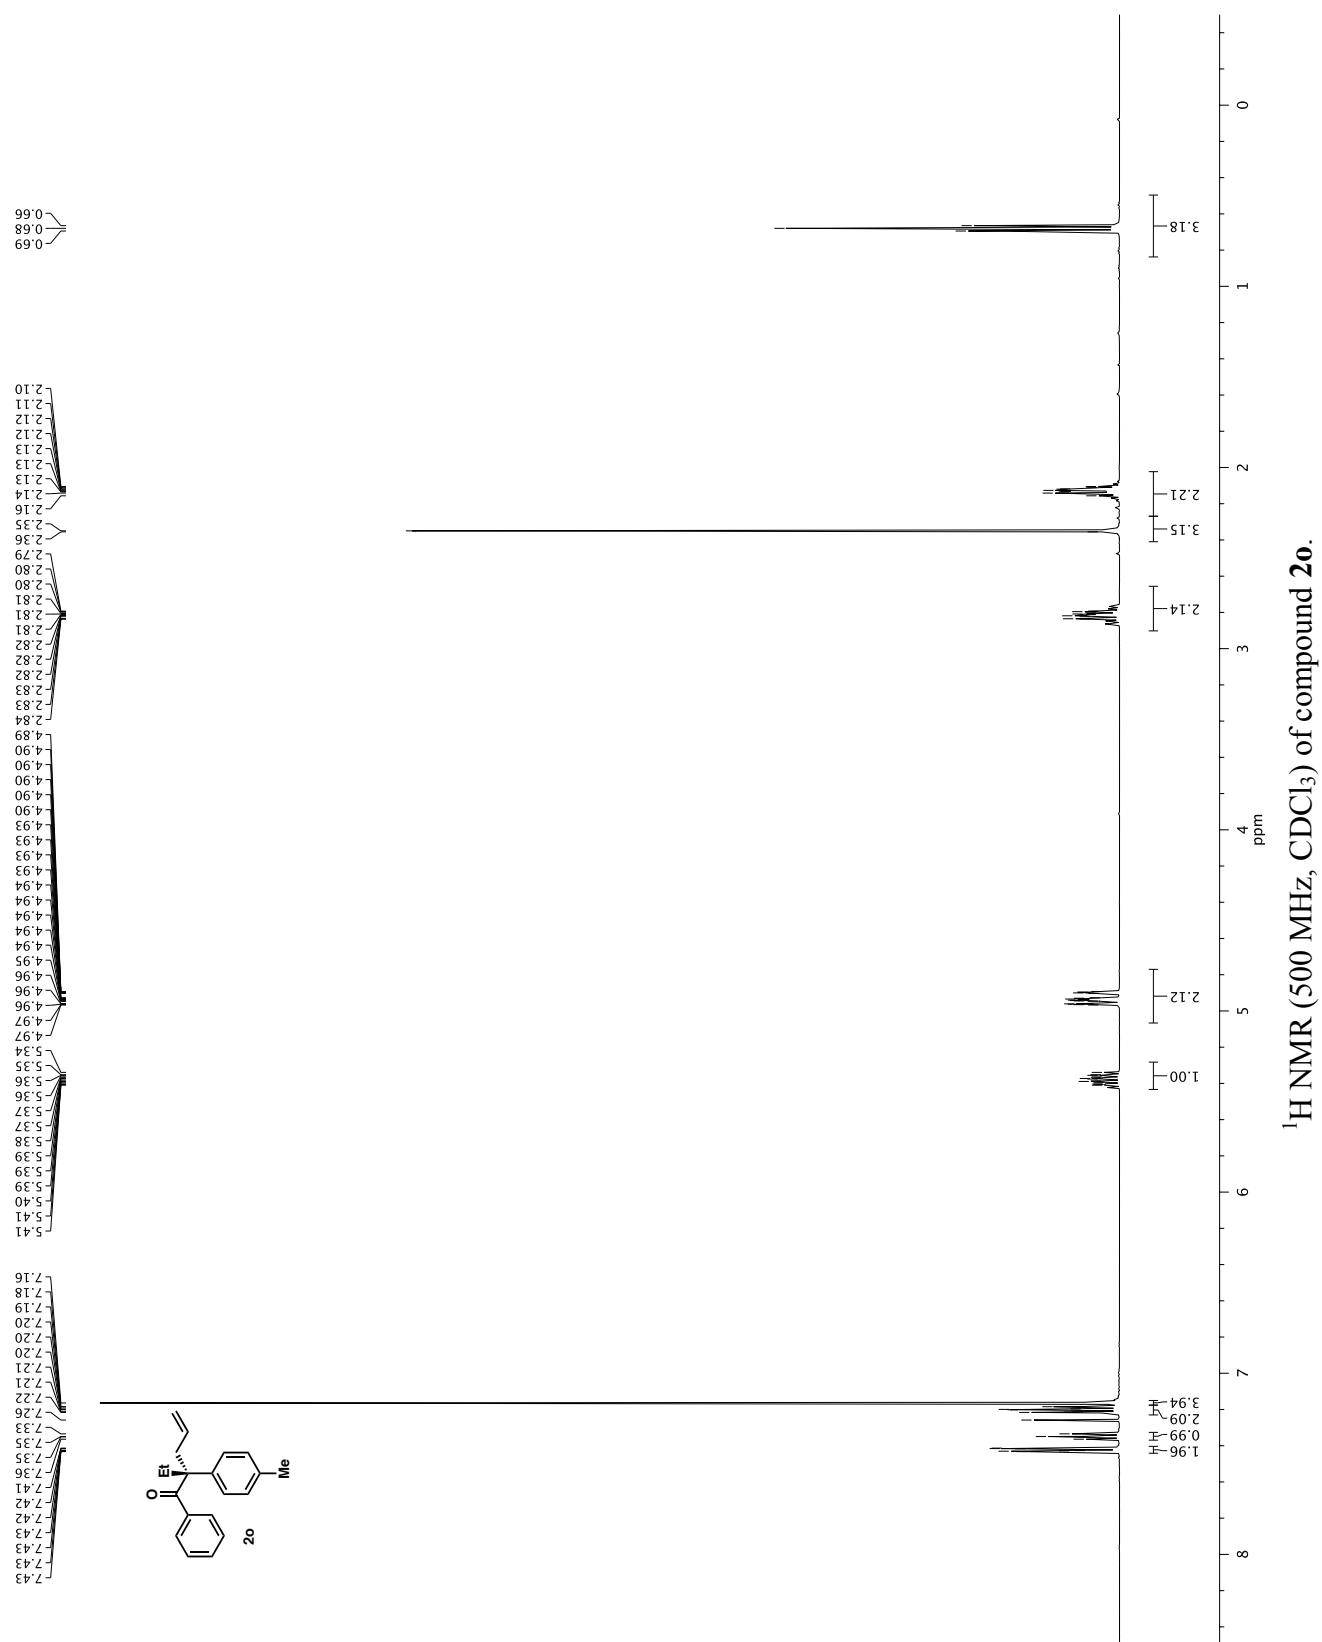



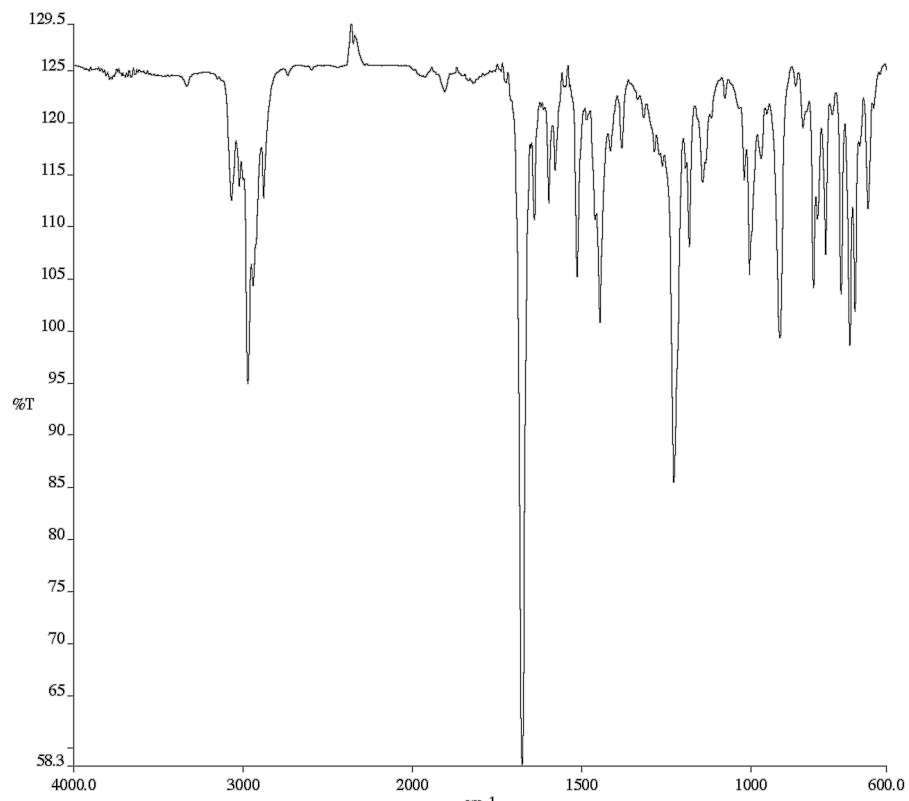Infrared spectrum (Thin Film, NaCl) of compound **2o**.

— 2031.55 — 1357.51 — 1329.46 — 1316.67 — 1311.65 — 1287.70 — 1281.03 — 1266.80 — 1118.10 — 57.79 — 39.22 — 26.87 — 21.19 — 7.98

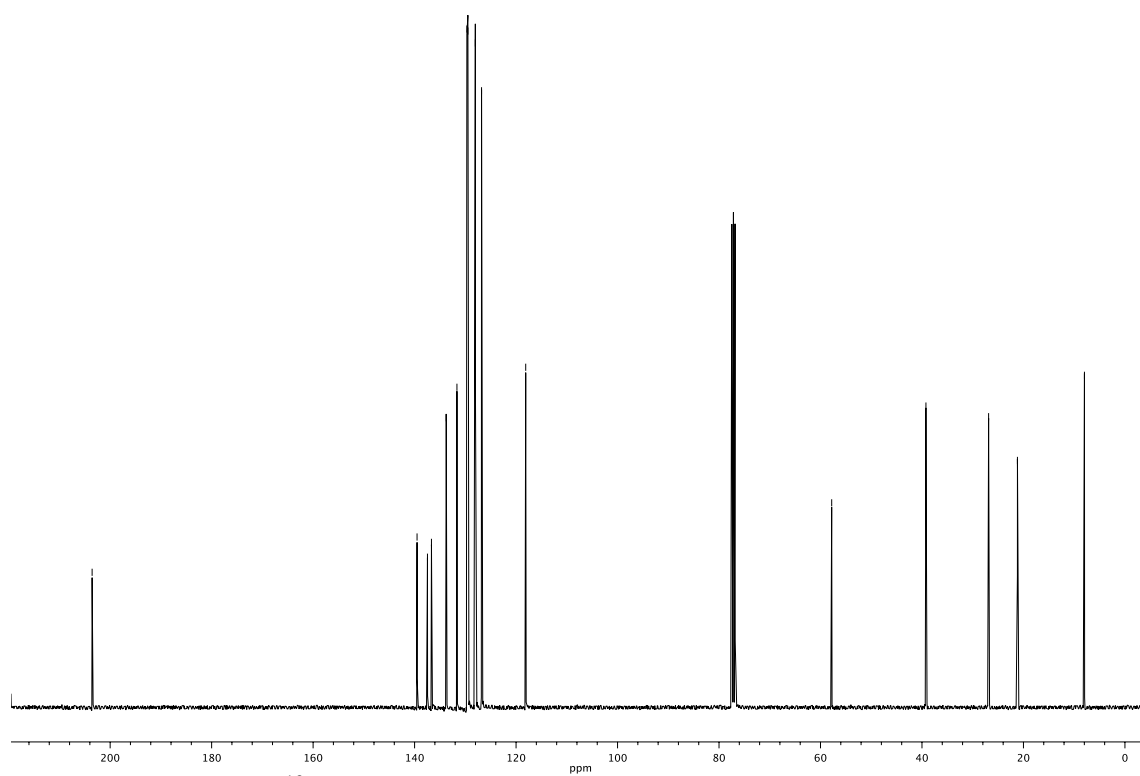<sup>13</sup>C NMR (100 MHz, CDCl<sub>3</sub>) of compound **2o**.

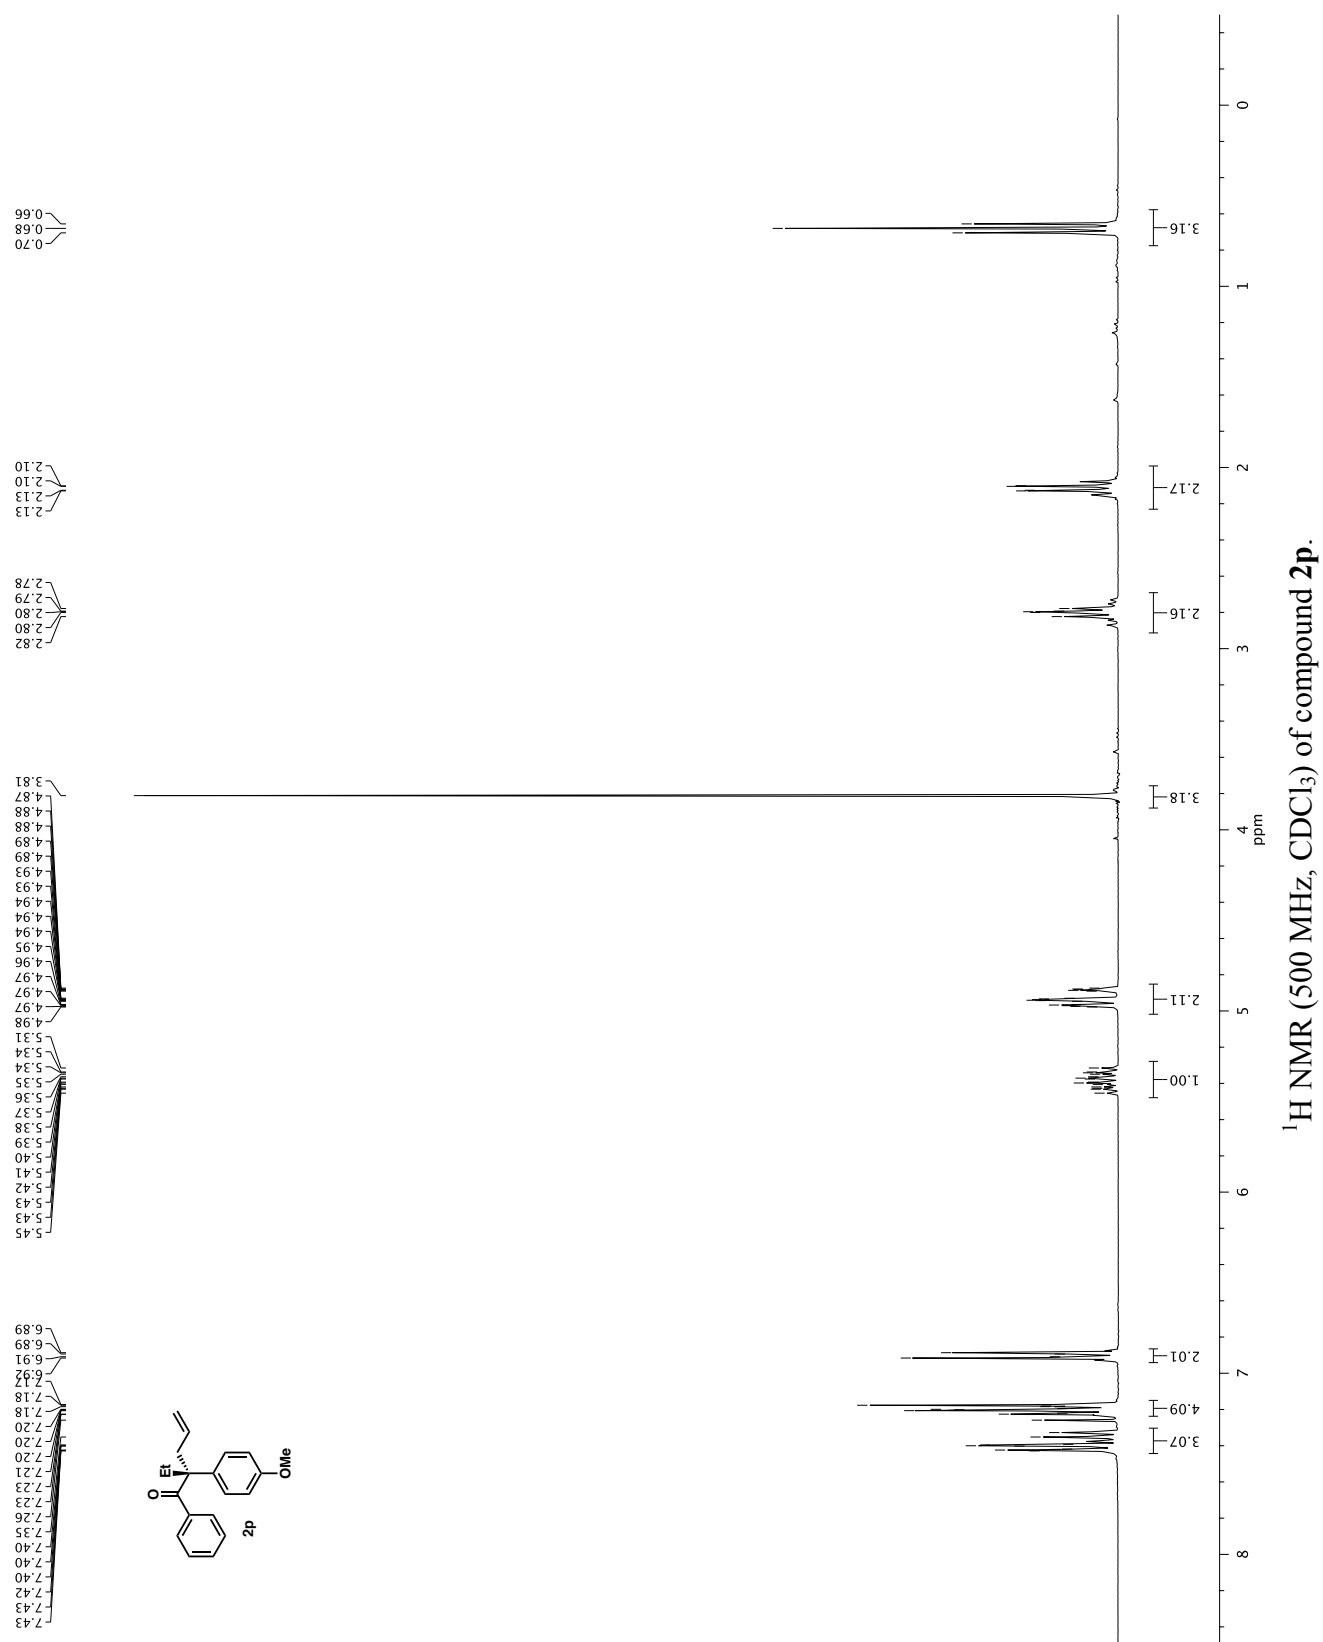

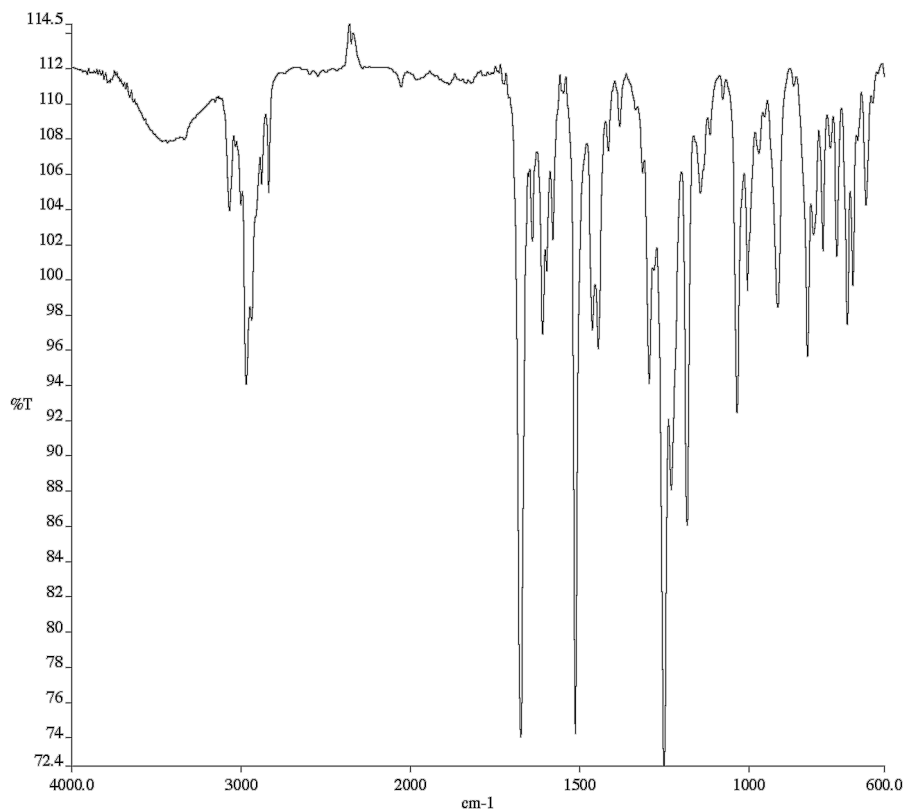Infrared spectrum (Thin Film, NaCl) of compound **2p**.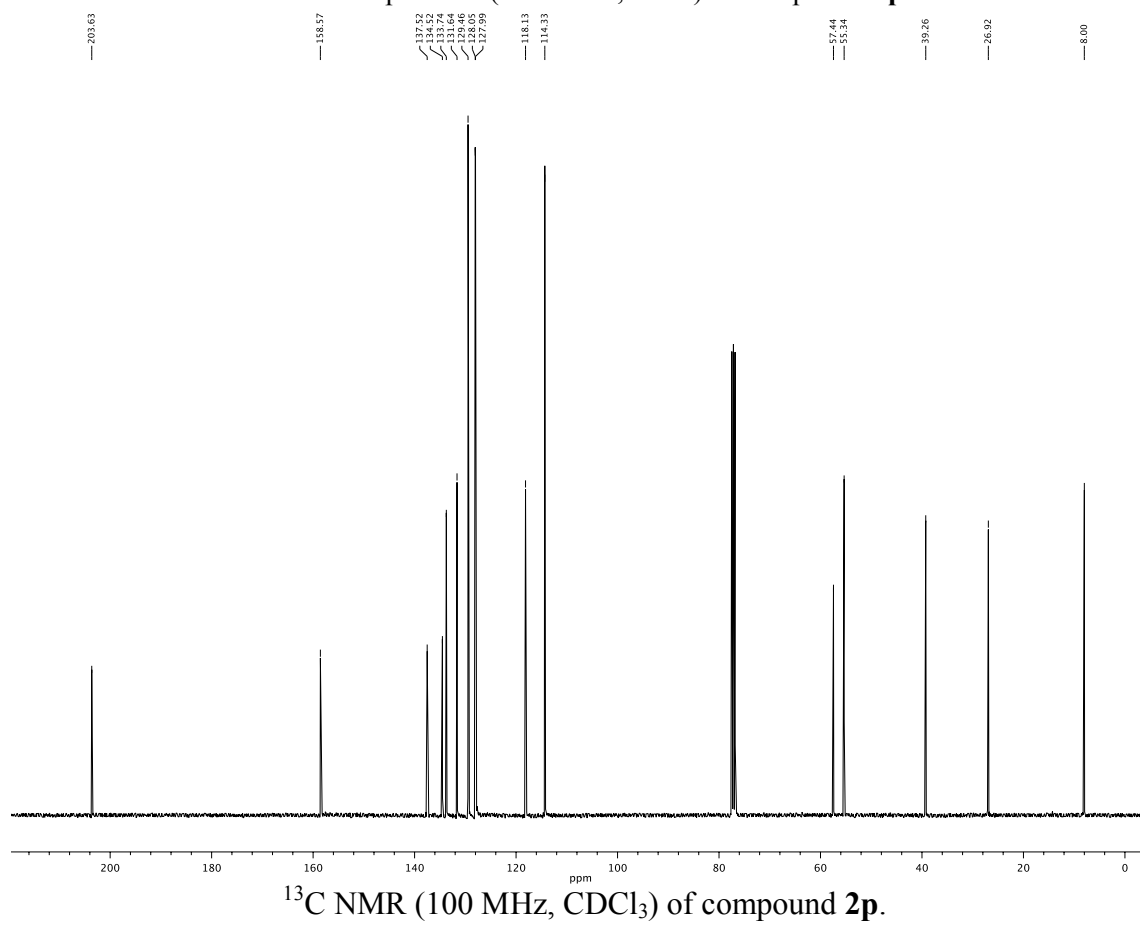

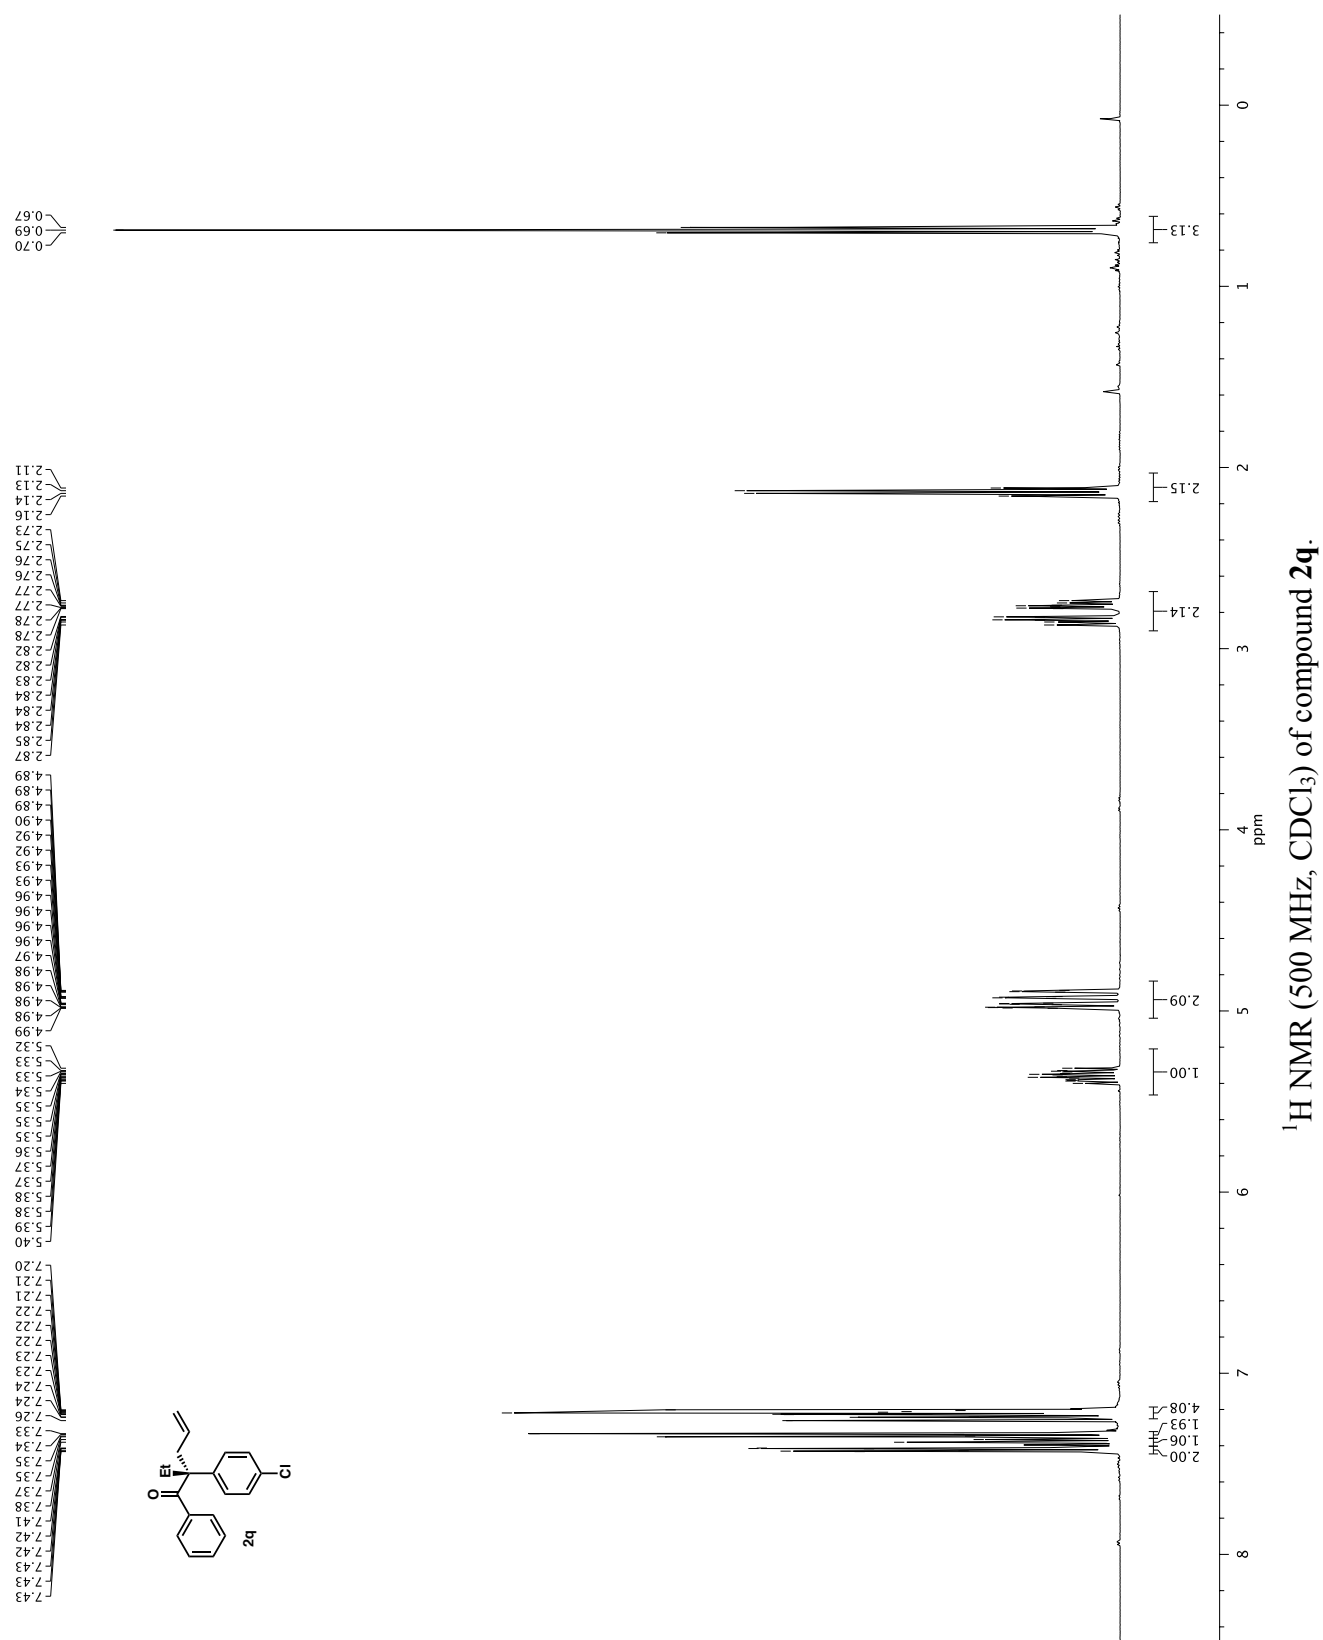

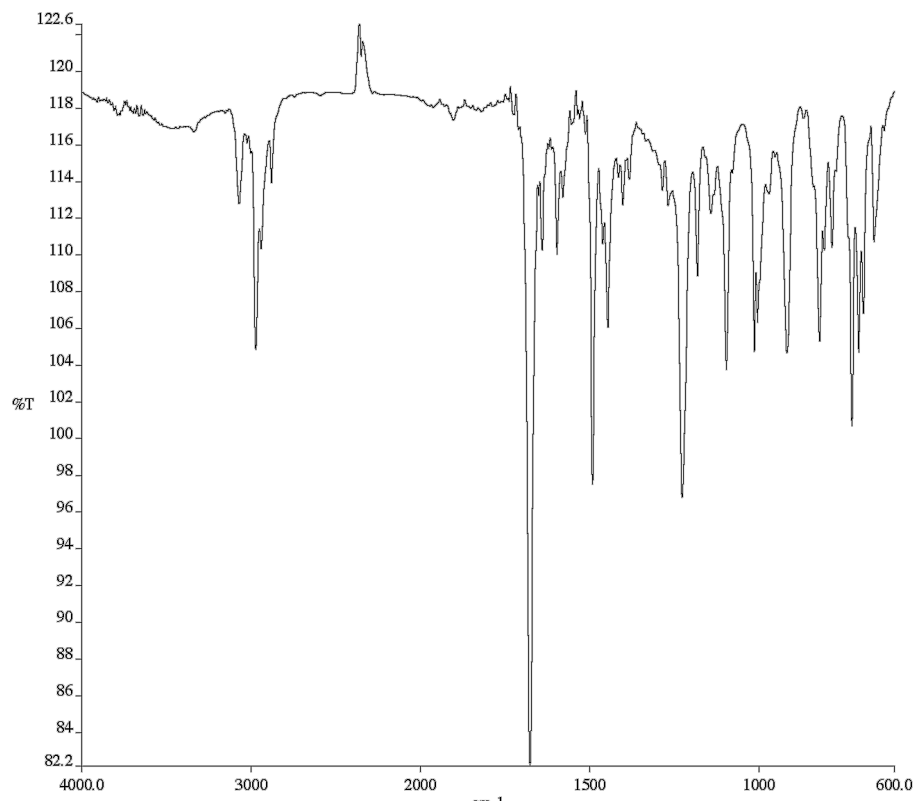Infrared spectrum (Thin Film, NaCl) of compound **2q**.

— 2027.72 — 161.65 — 150.94 — 137.12 — 133.21 — 131.08 — 129.45 — 128.33 — 128.19 — 118.68 — 57.81 — 39.32 — 26.97 — 7.97

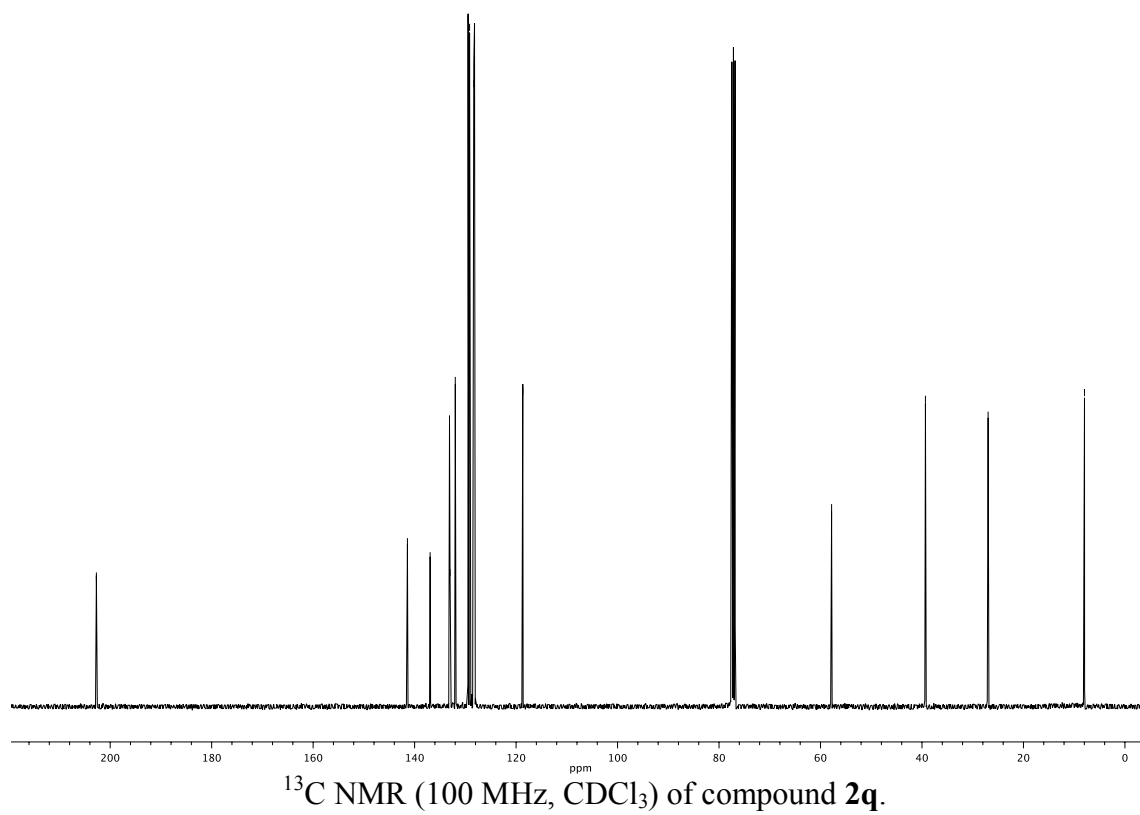

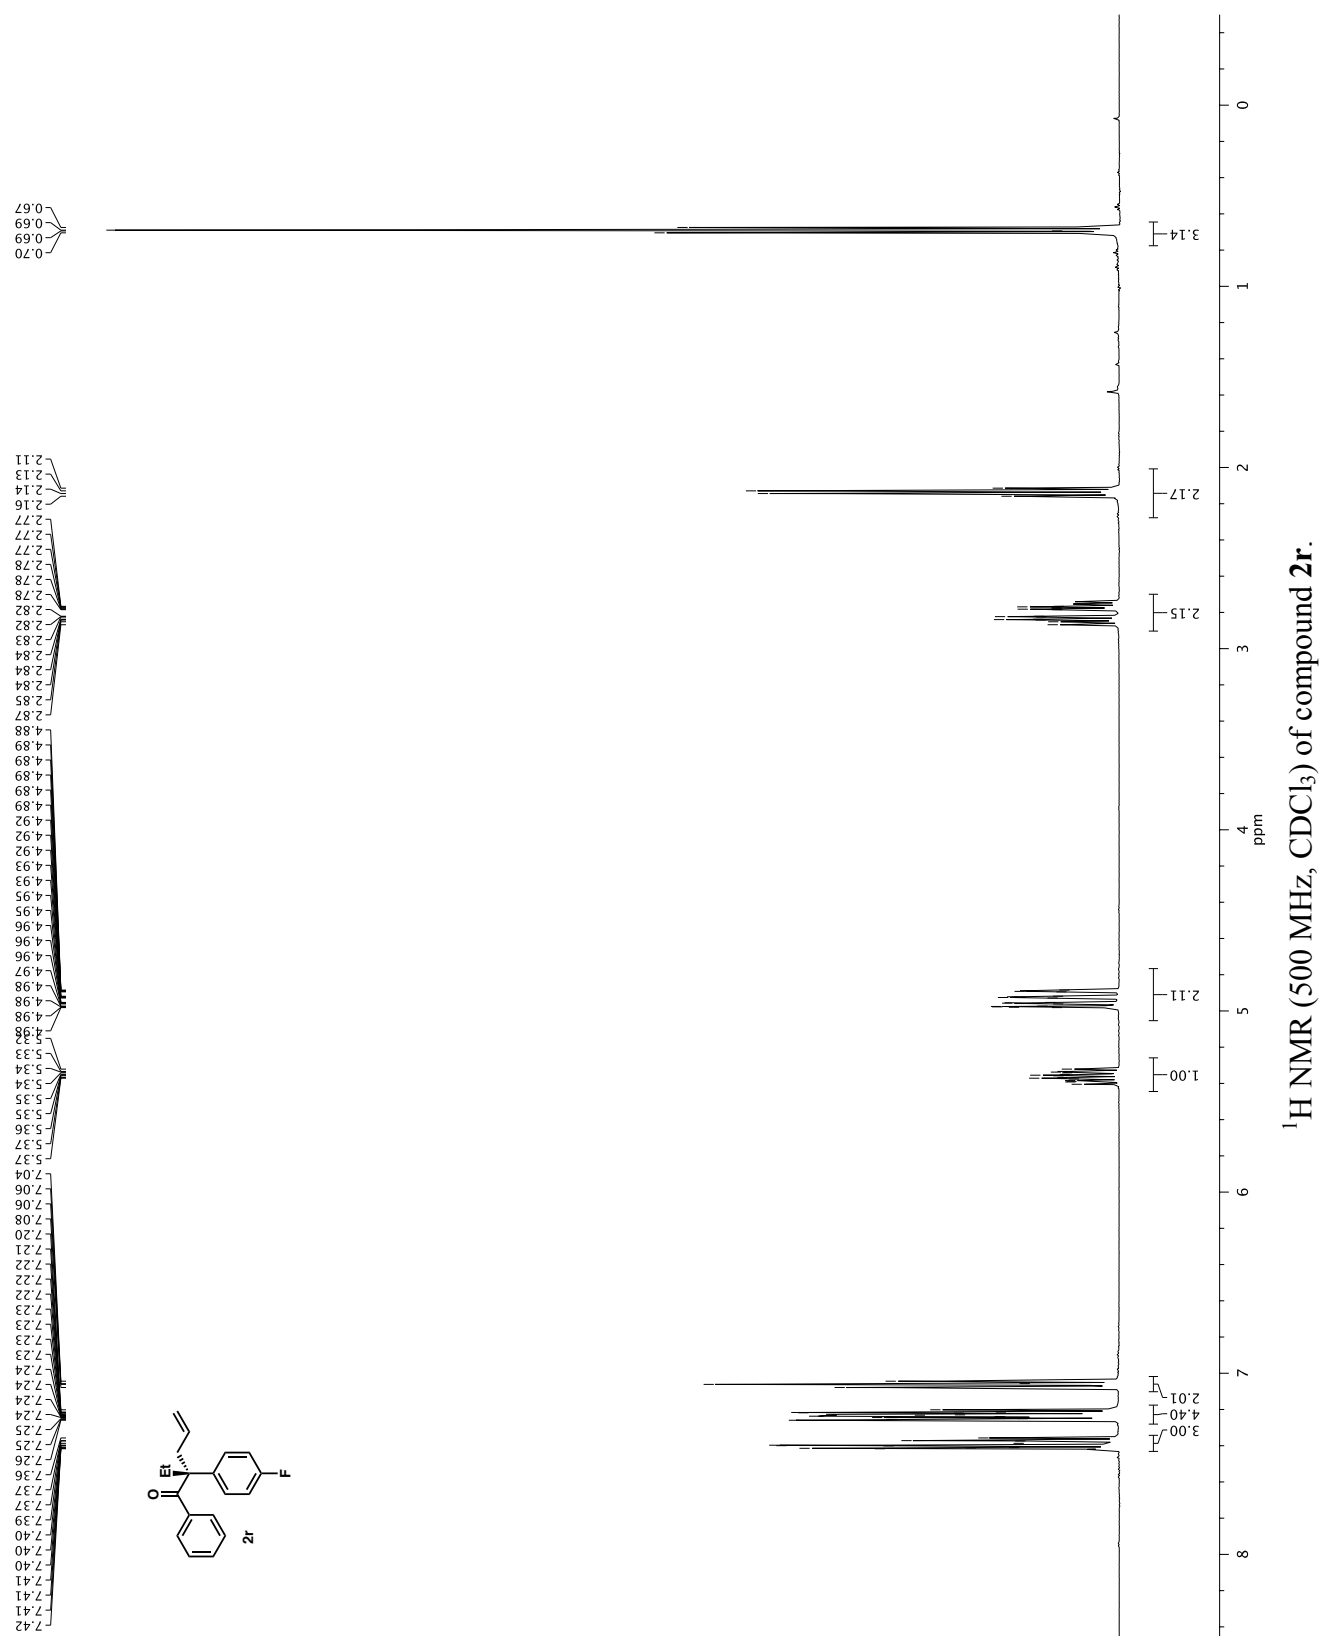

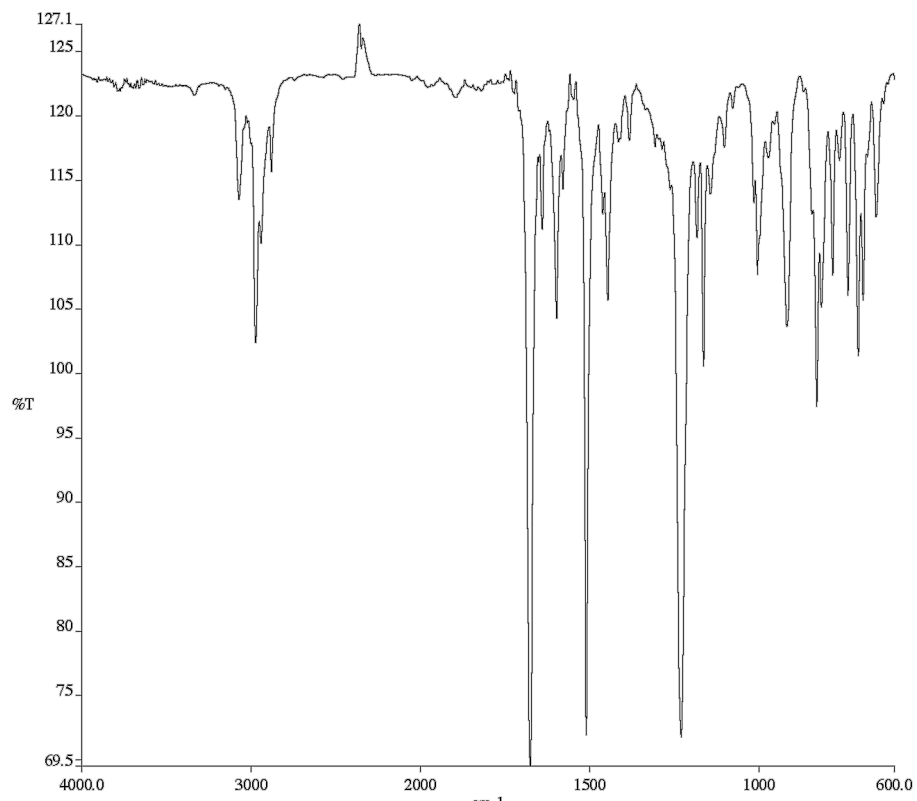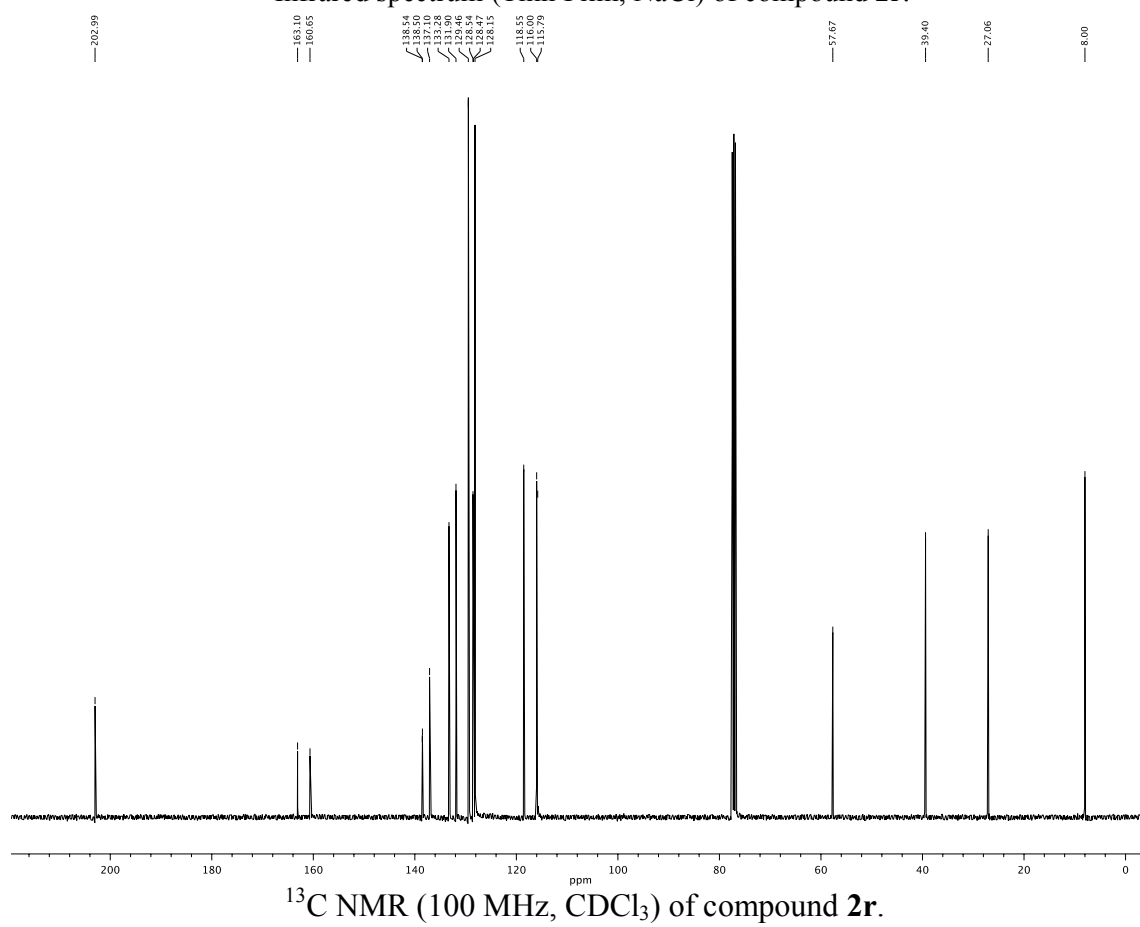

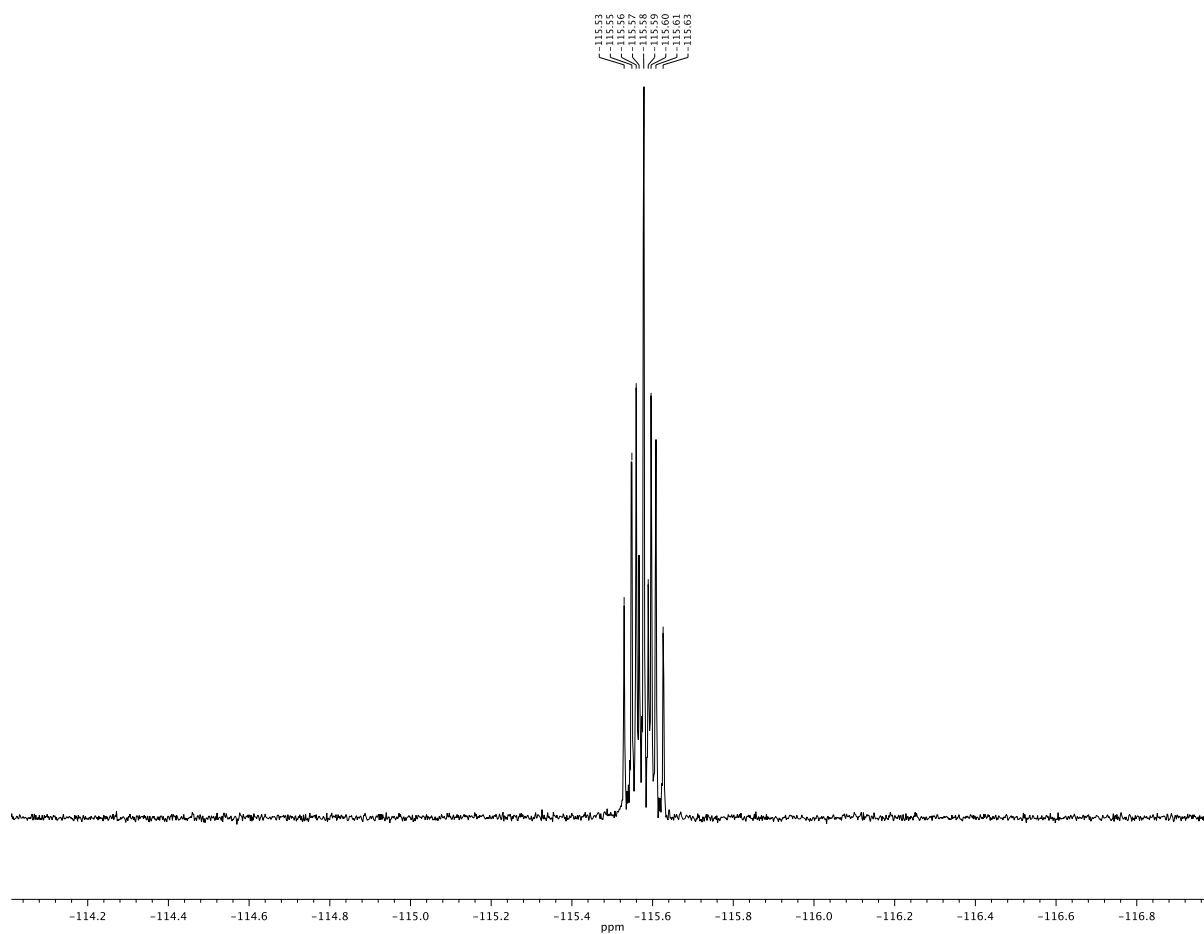

$^{19}\text{F}$  NMR (282 MHz,  $\text{CDCl}_3$ ) of compound **2r**.



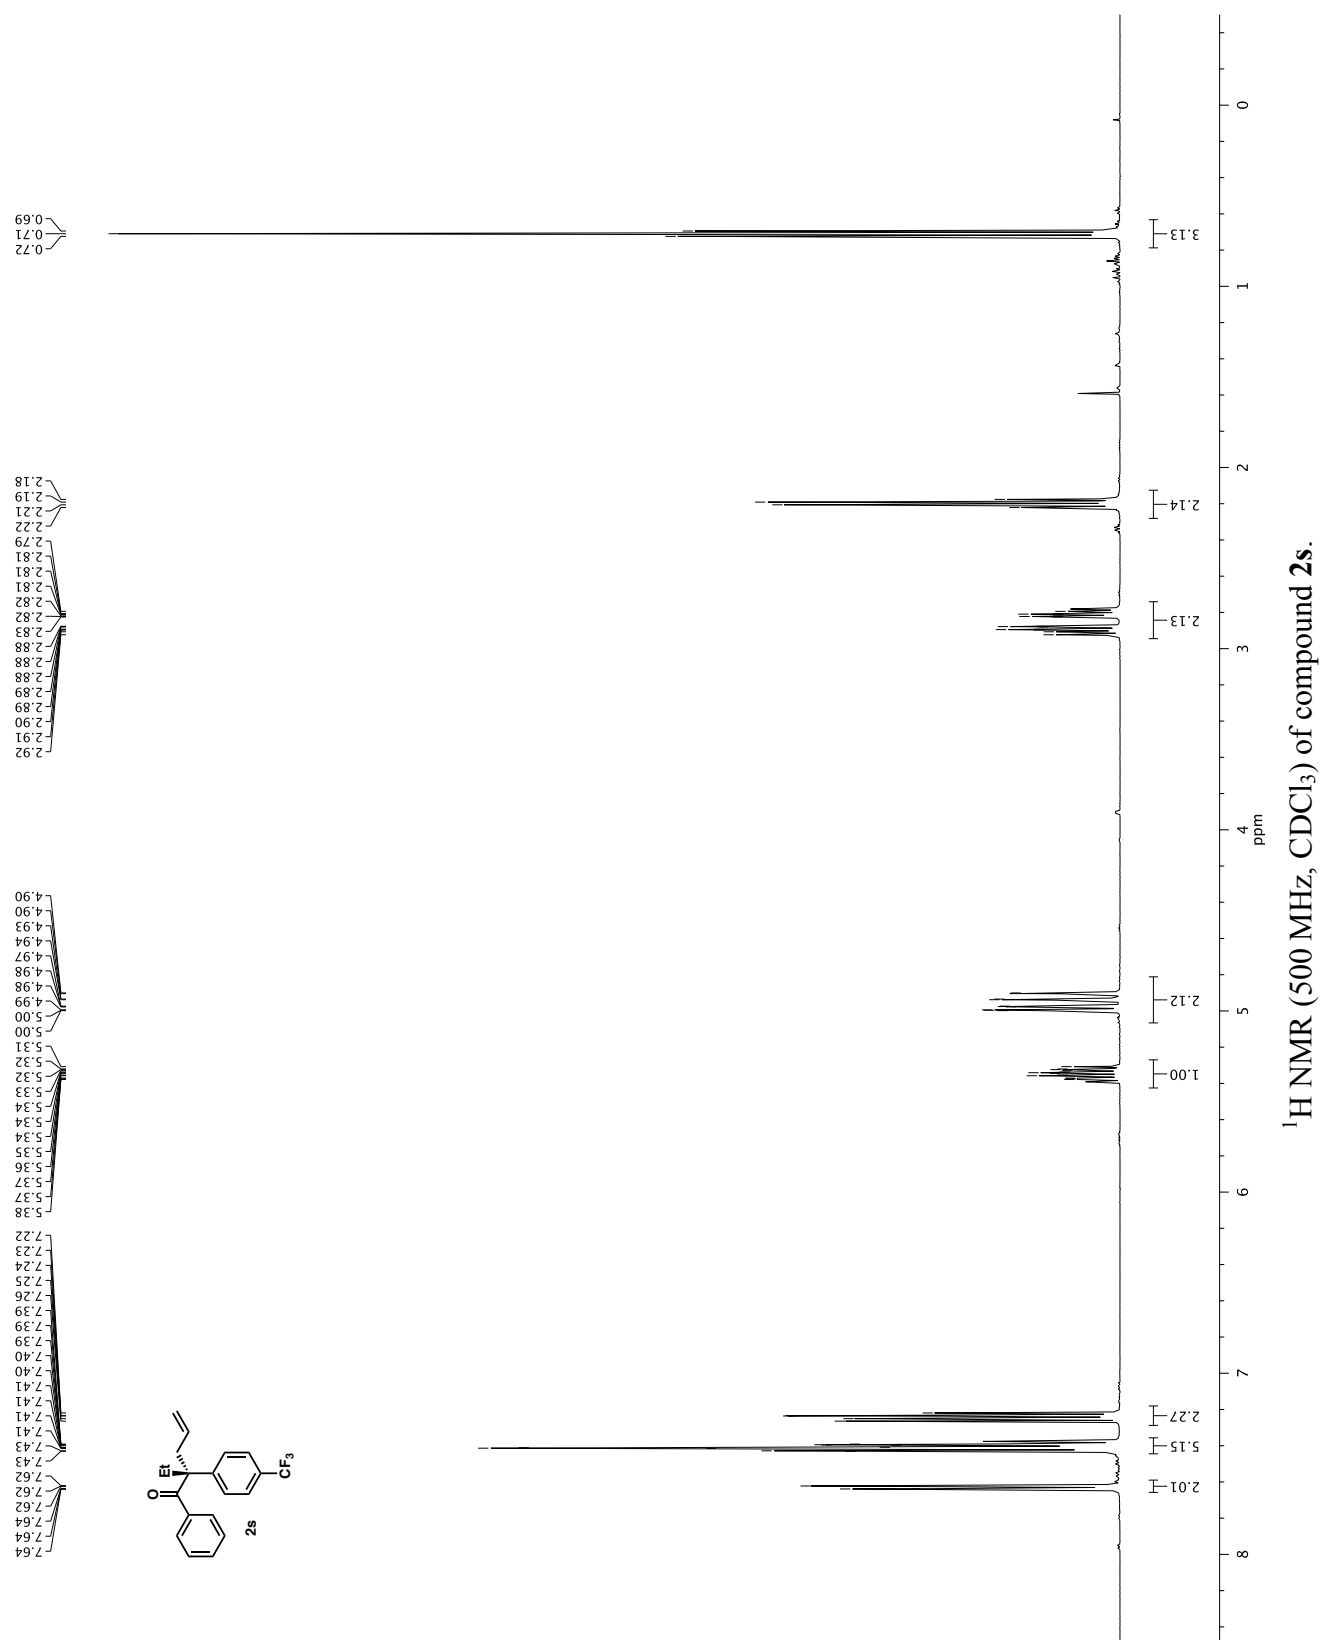

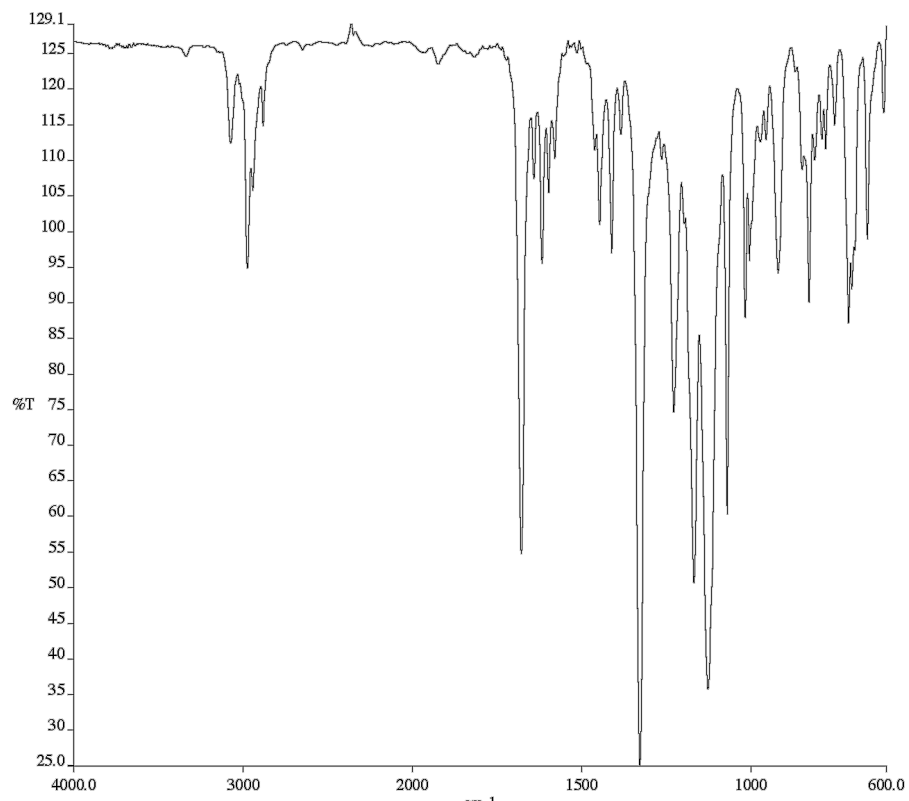Infrared spectrum (Thin Film, NaCl) of compound **2s**.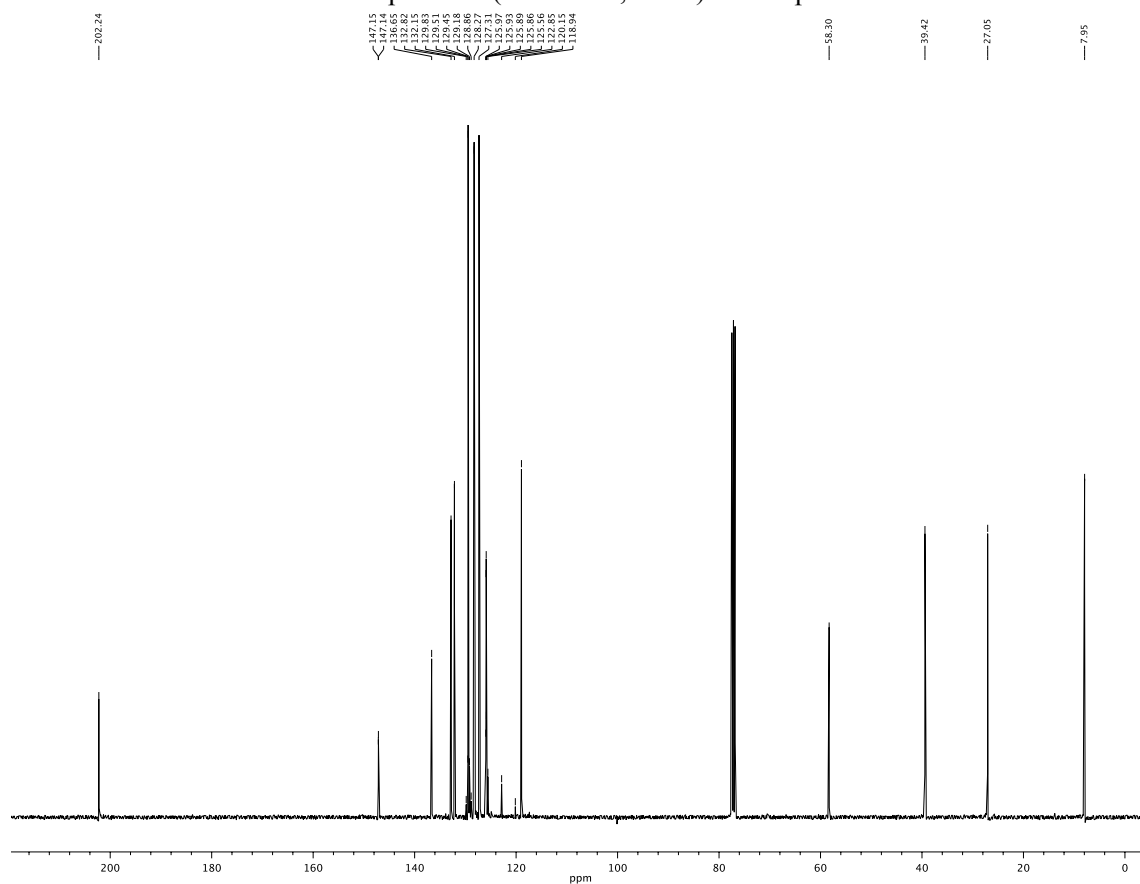 $^{13}\text{C}$  NMR (100 MHz,  $\text{CDCl}_3$ ) of compound **2s**.

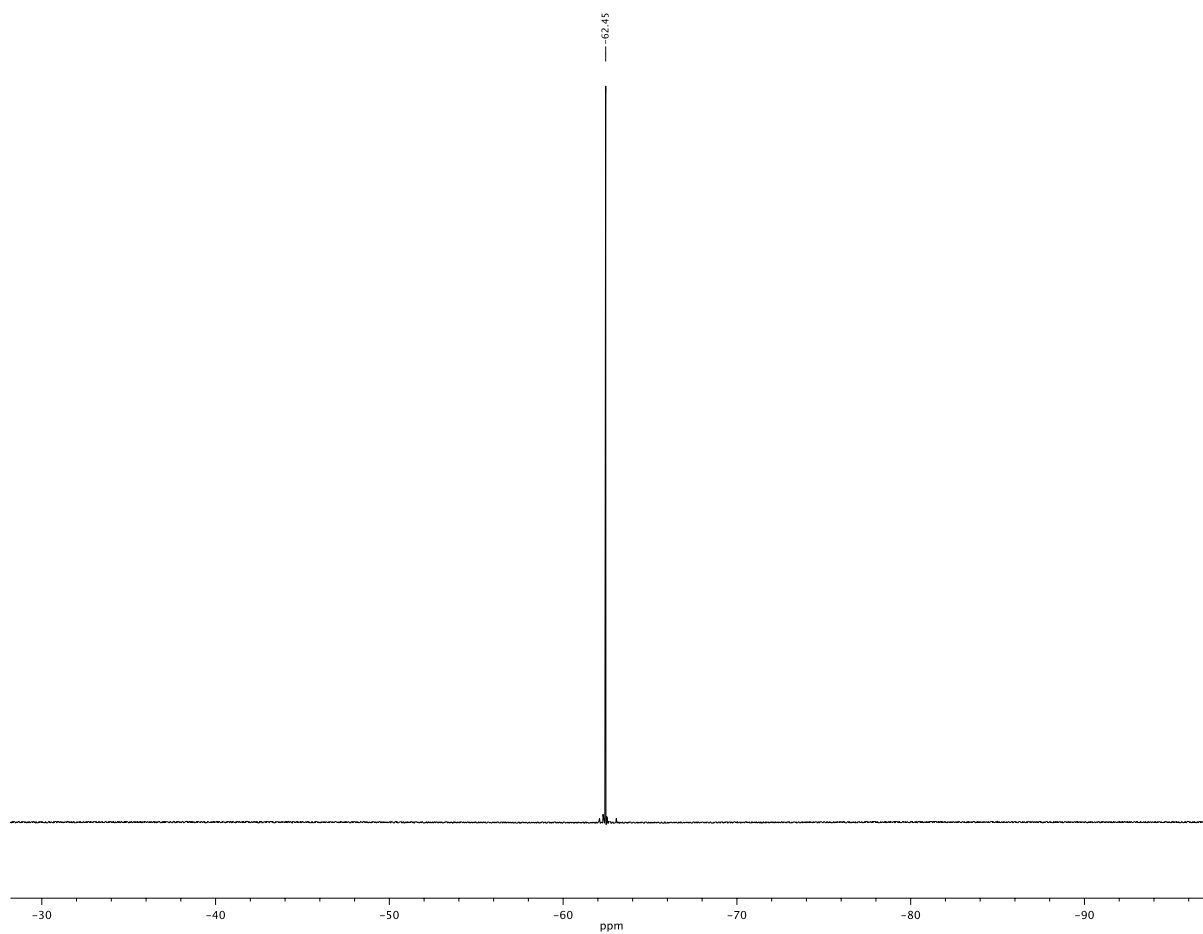

$^{19}\text{F}$  NMR (282 MHz,  $\text{CDCl}_3$ ) of compound **2s**.

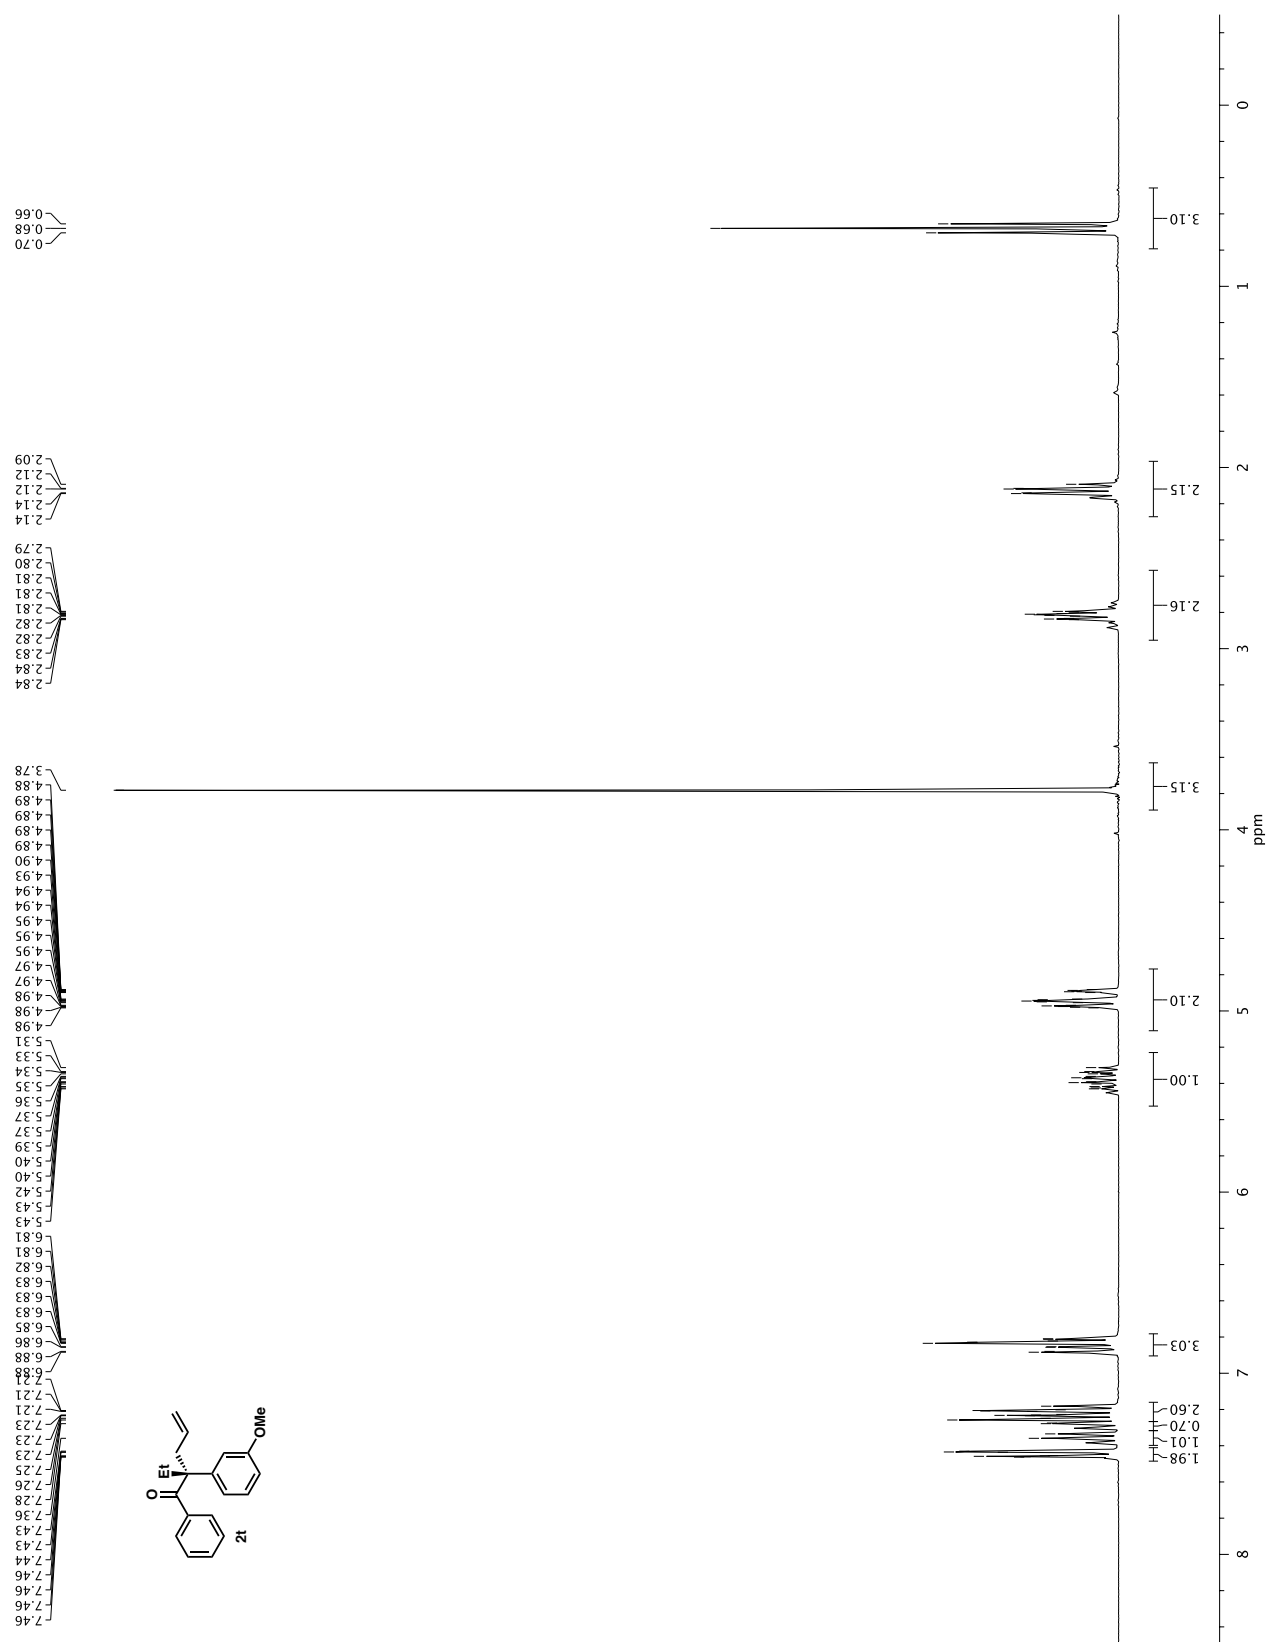

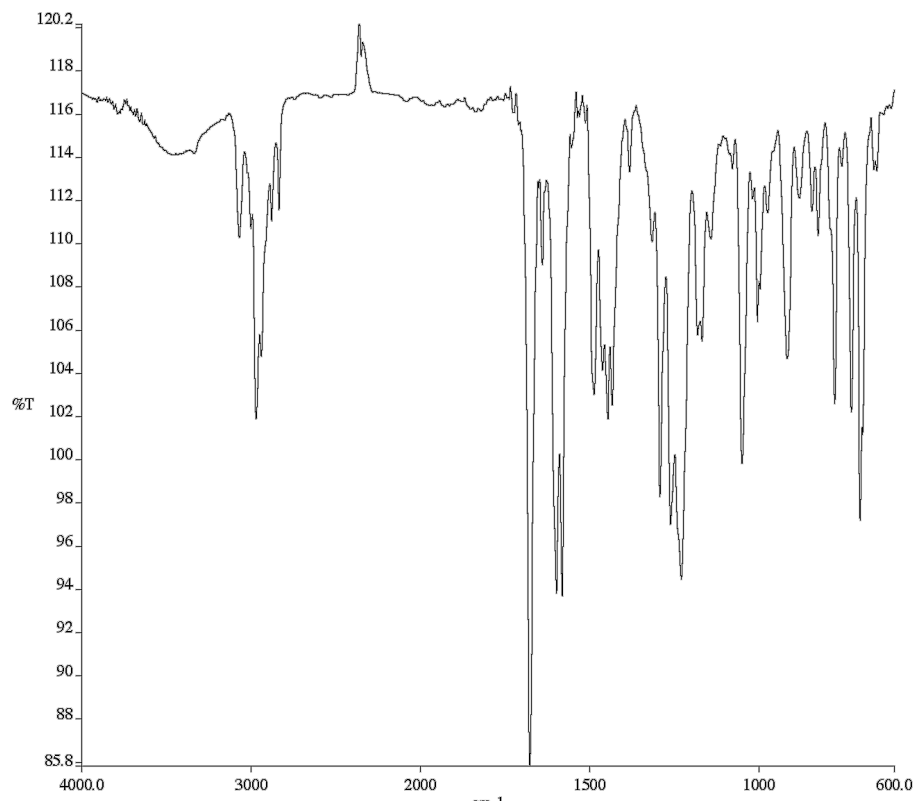Infrared spectrum (Thin Film, NaCl) of compound **2t**.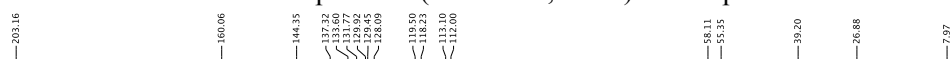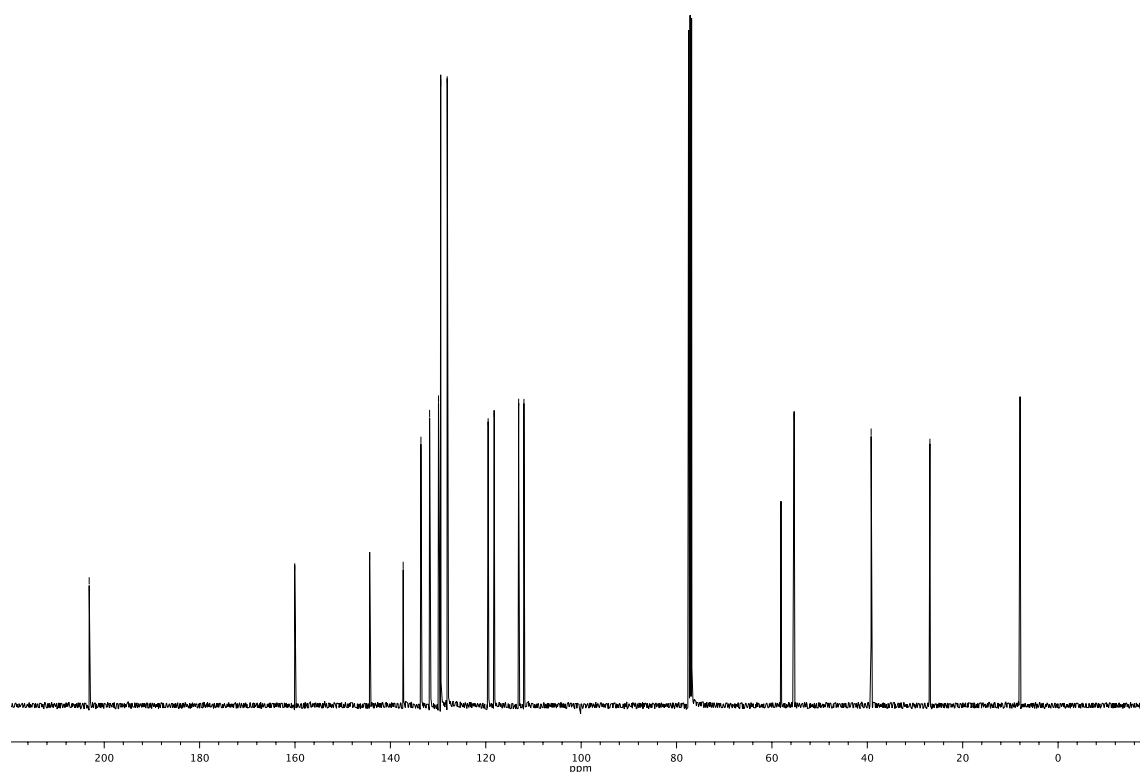<sup>13</sup>C NMR (100 MHz, CDCl<sub>3</sub>) of compound **2t**.

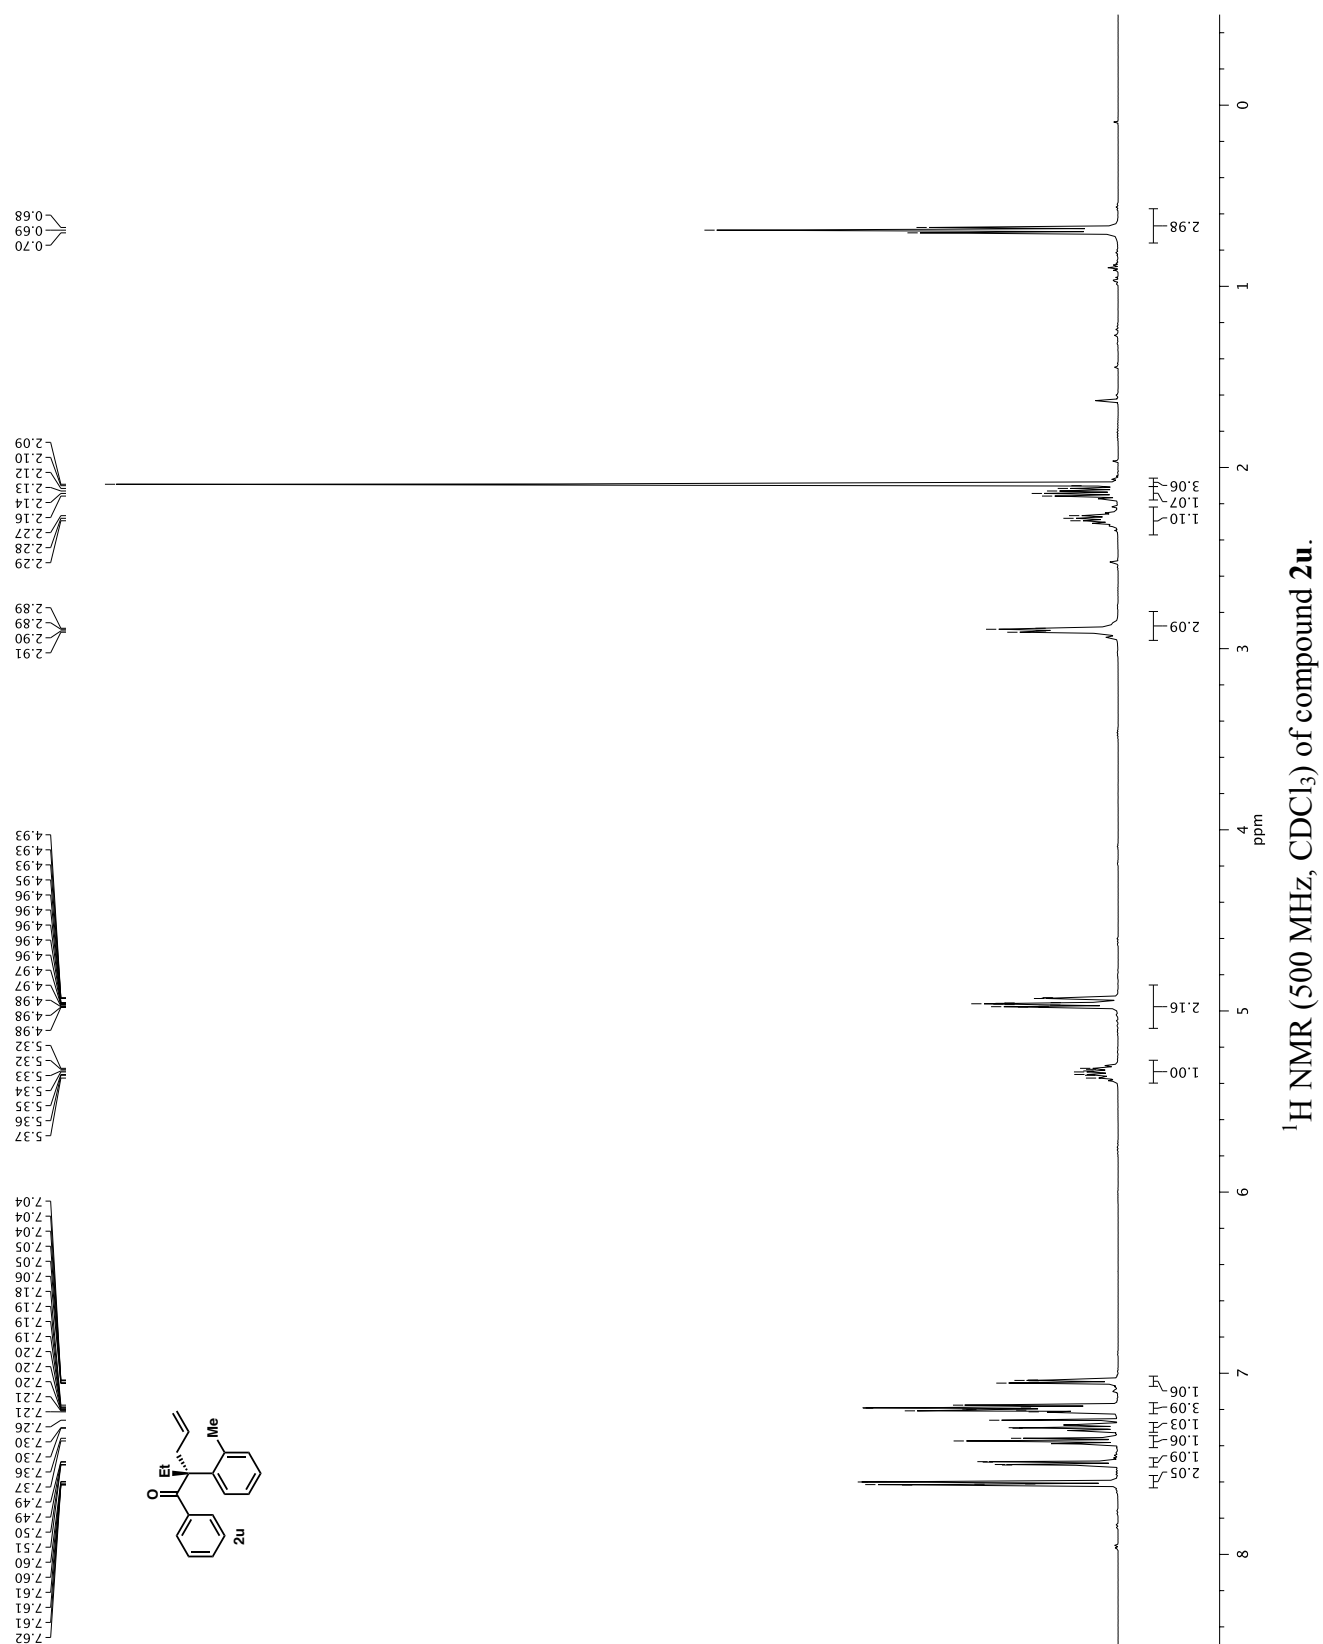

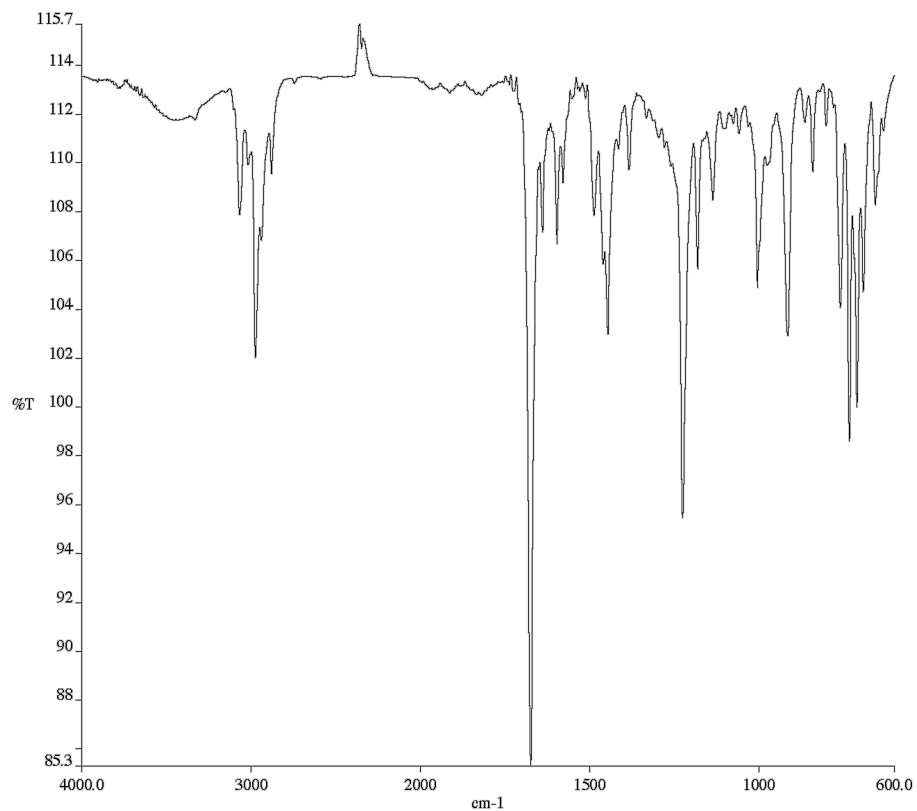Infrared spectrum (Thin Film, NaCl) of compound **2u**.

— 2031.14 — 151.64 — 136.70 — 132.86 — 132.34 — 128.12 — 127.10 — 126.65 — 126.37 — 118.15 — 57.04 — 37.25 — 26.62 — 21.08 — 8.12

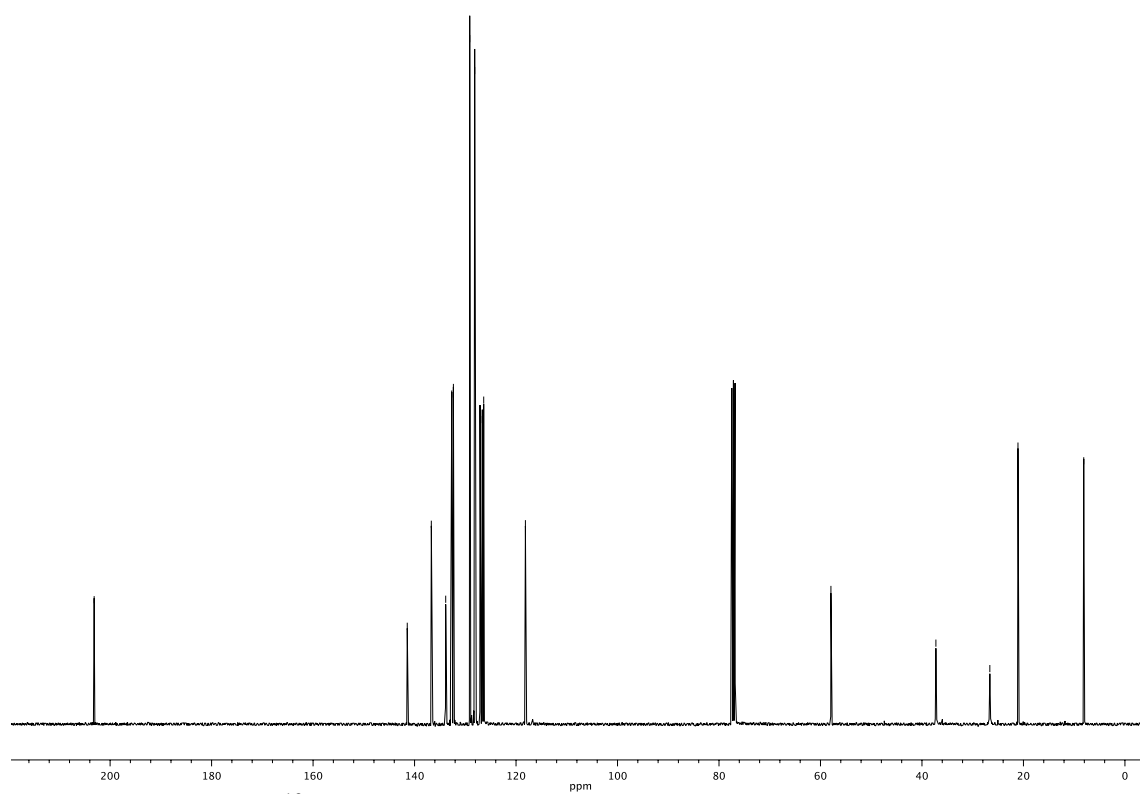<sup>13</sup>C NMR (100 MHz, CDCl<sub>3</sub>) of compound **2u**.

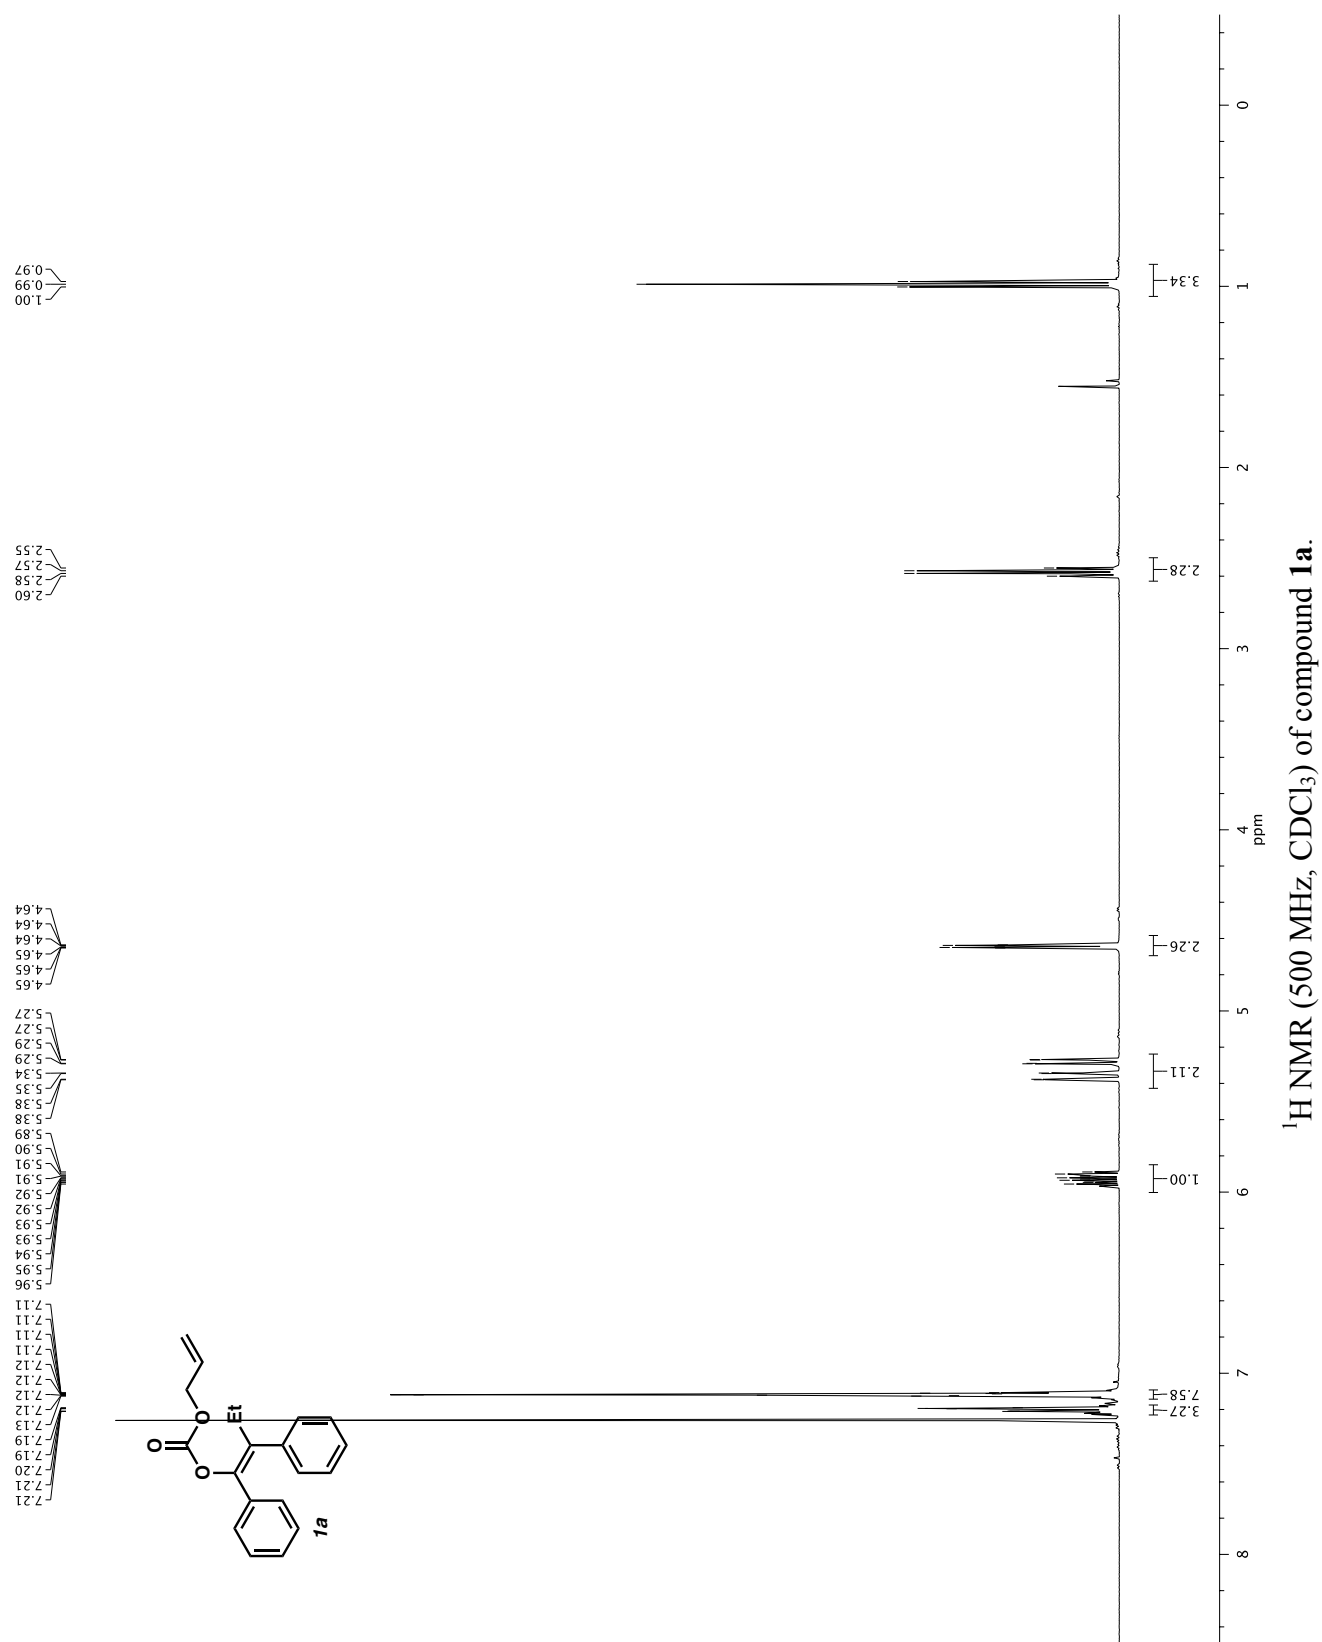



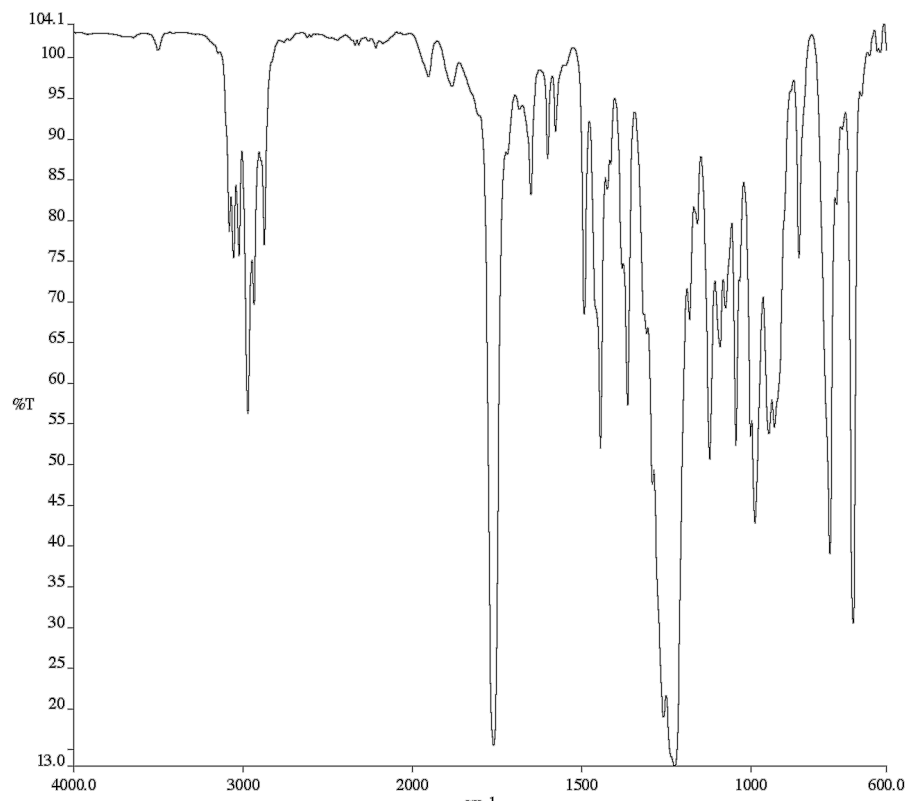Infrared spectrum (Thin Film, NaCl) of compound **1a**.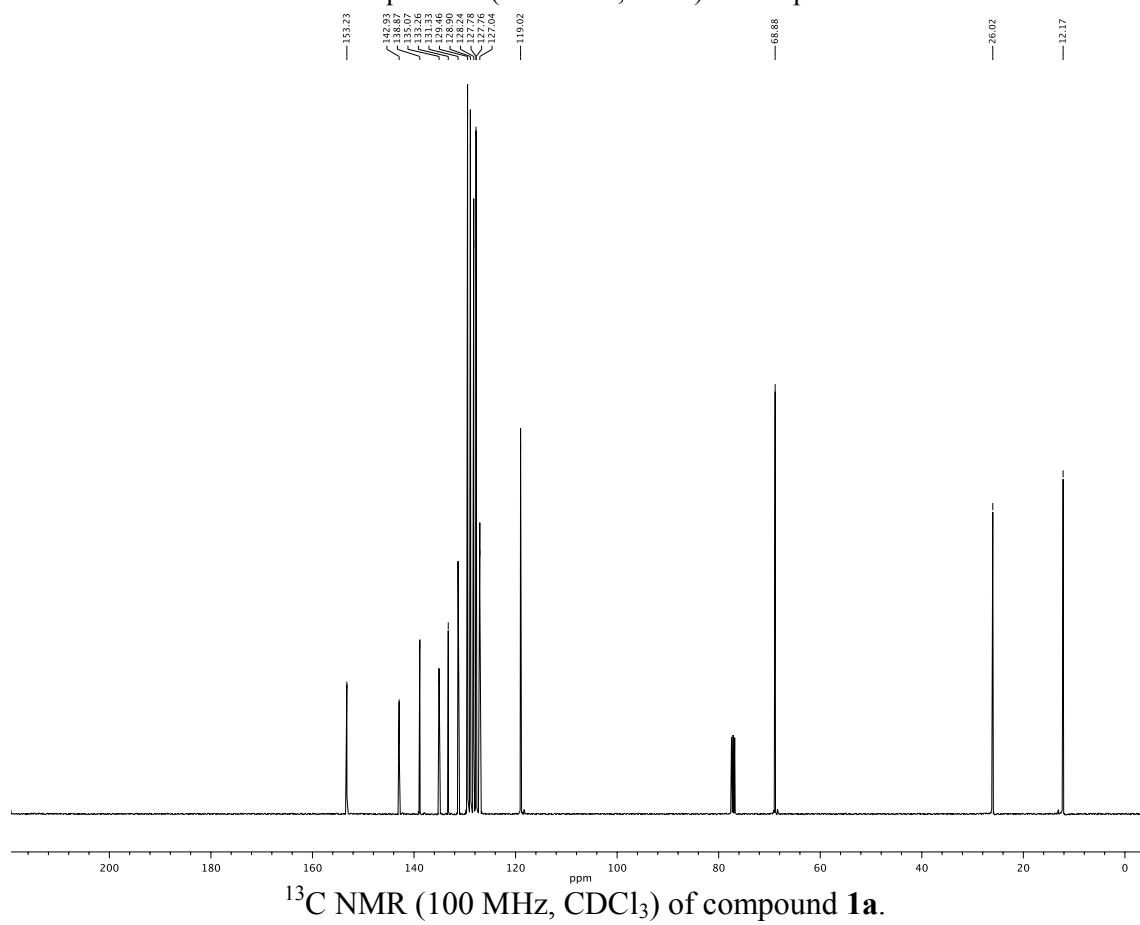

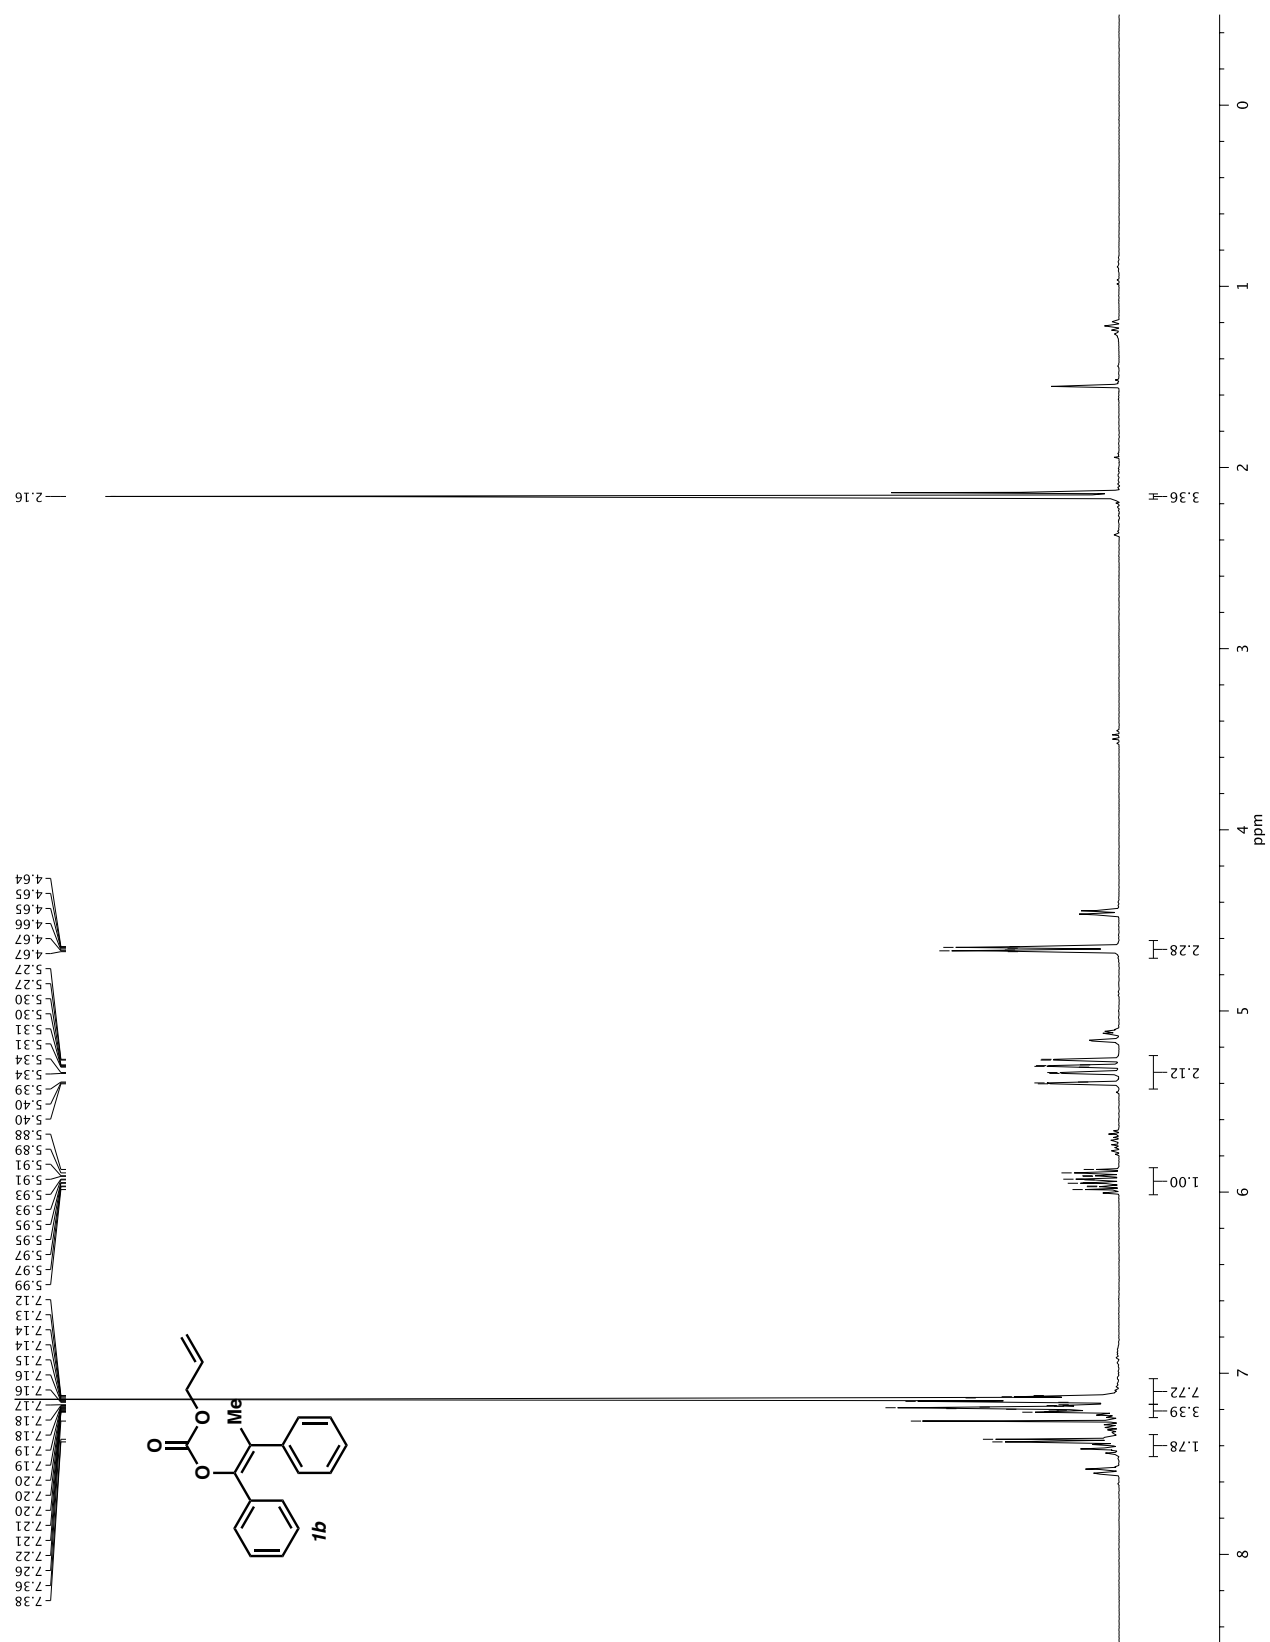

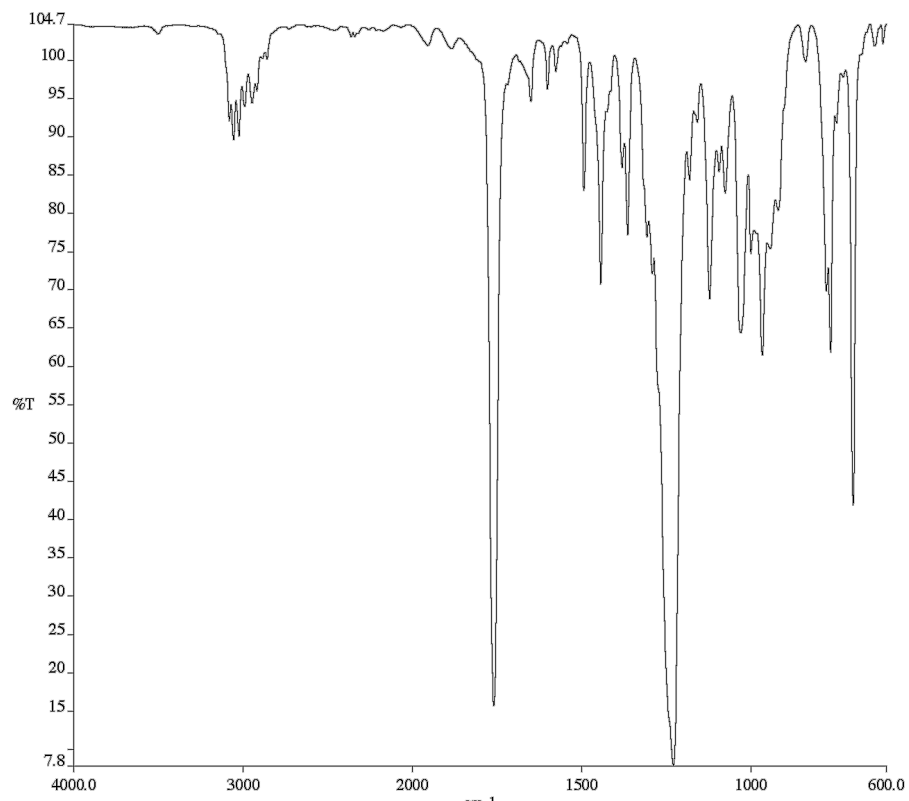Infrared spectrum (Thin Film, NaCl) of compound **1b**.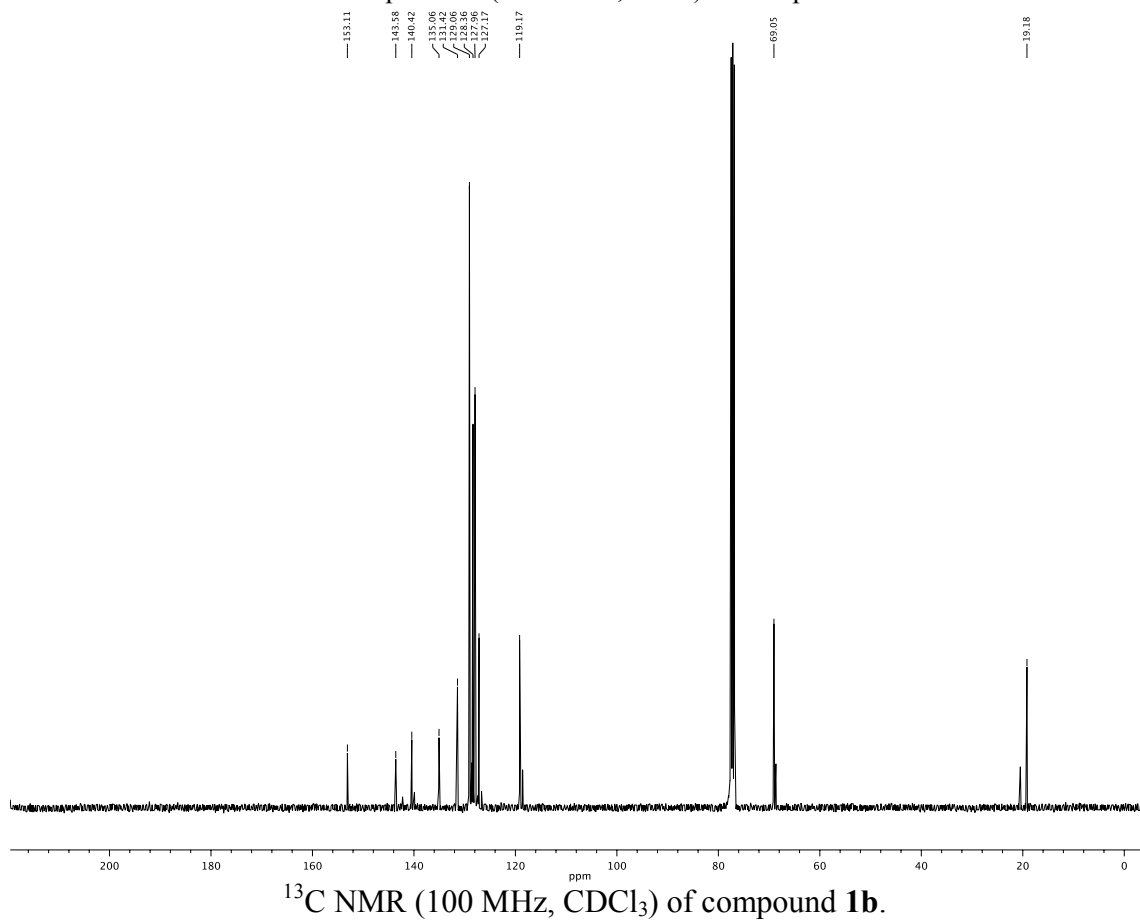

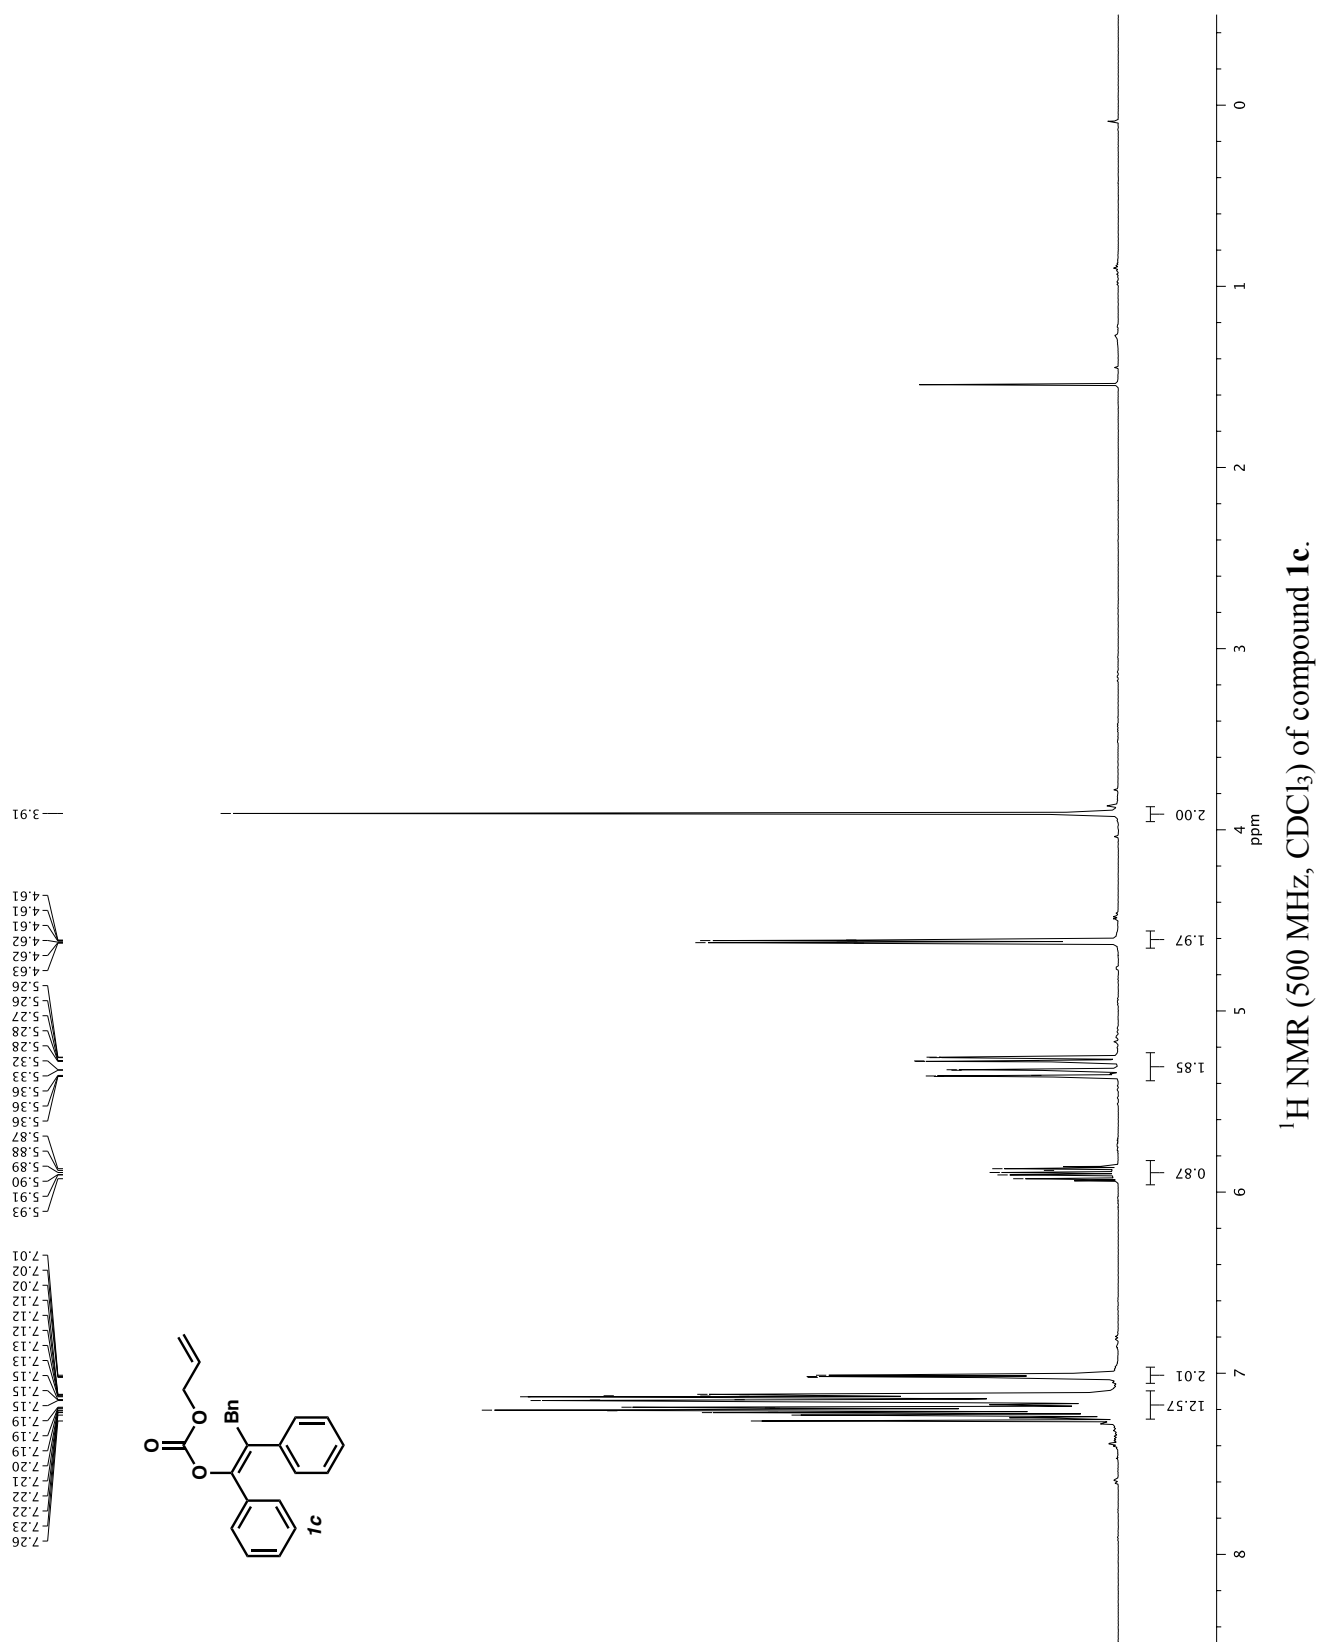

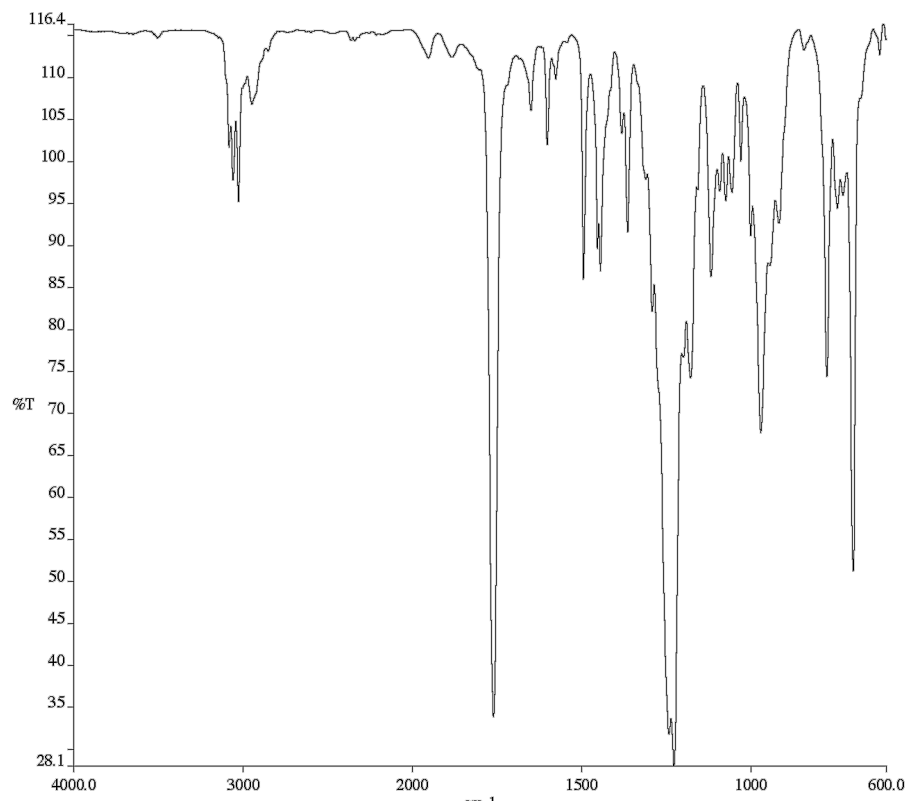Infrared spectrum (Thin Film, NaCl) of compound **1c**.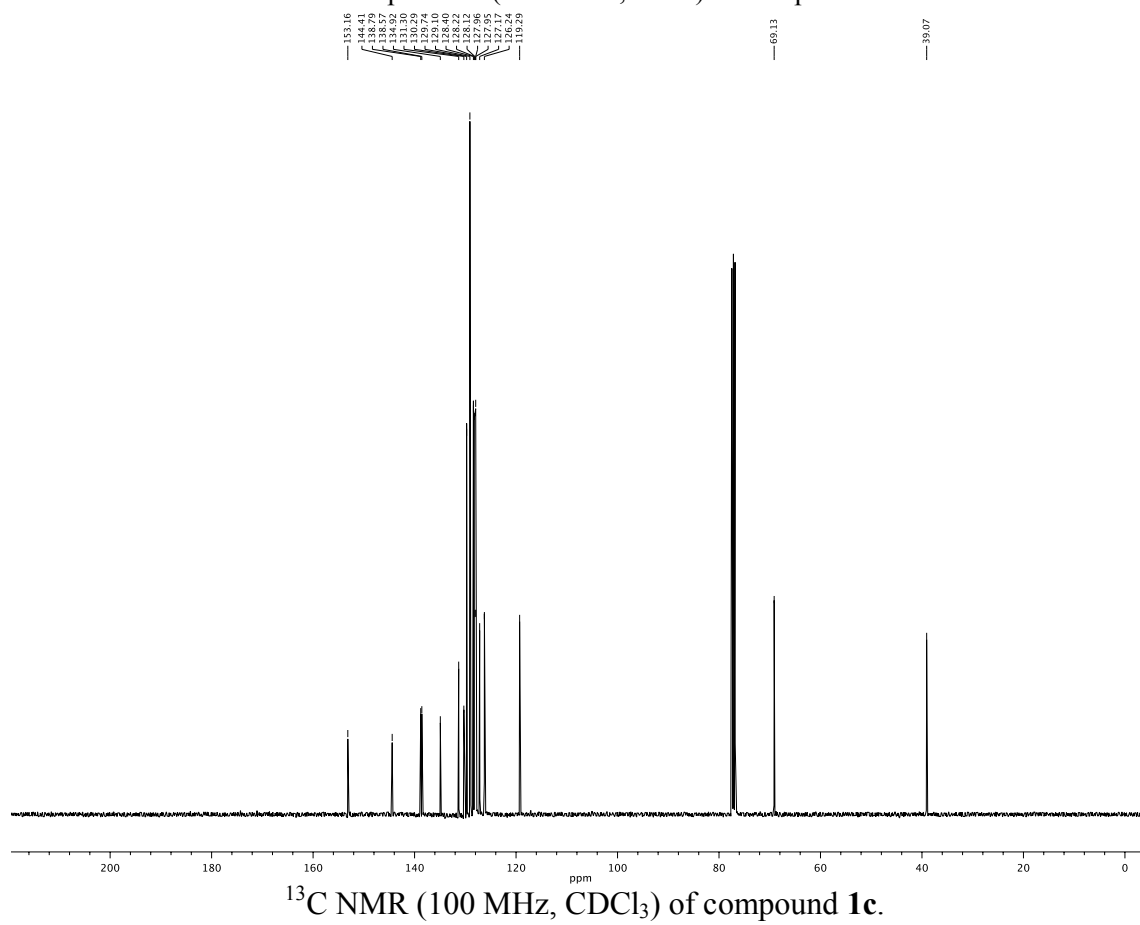

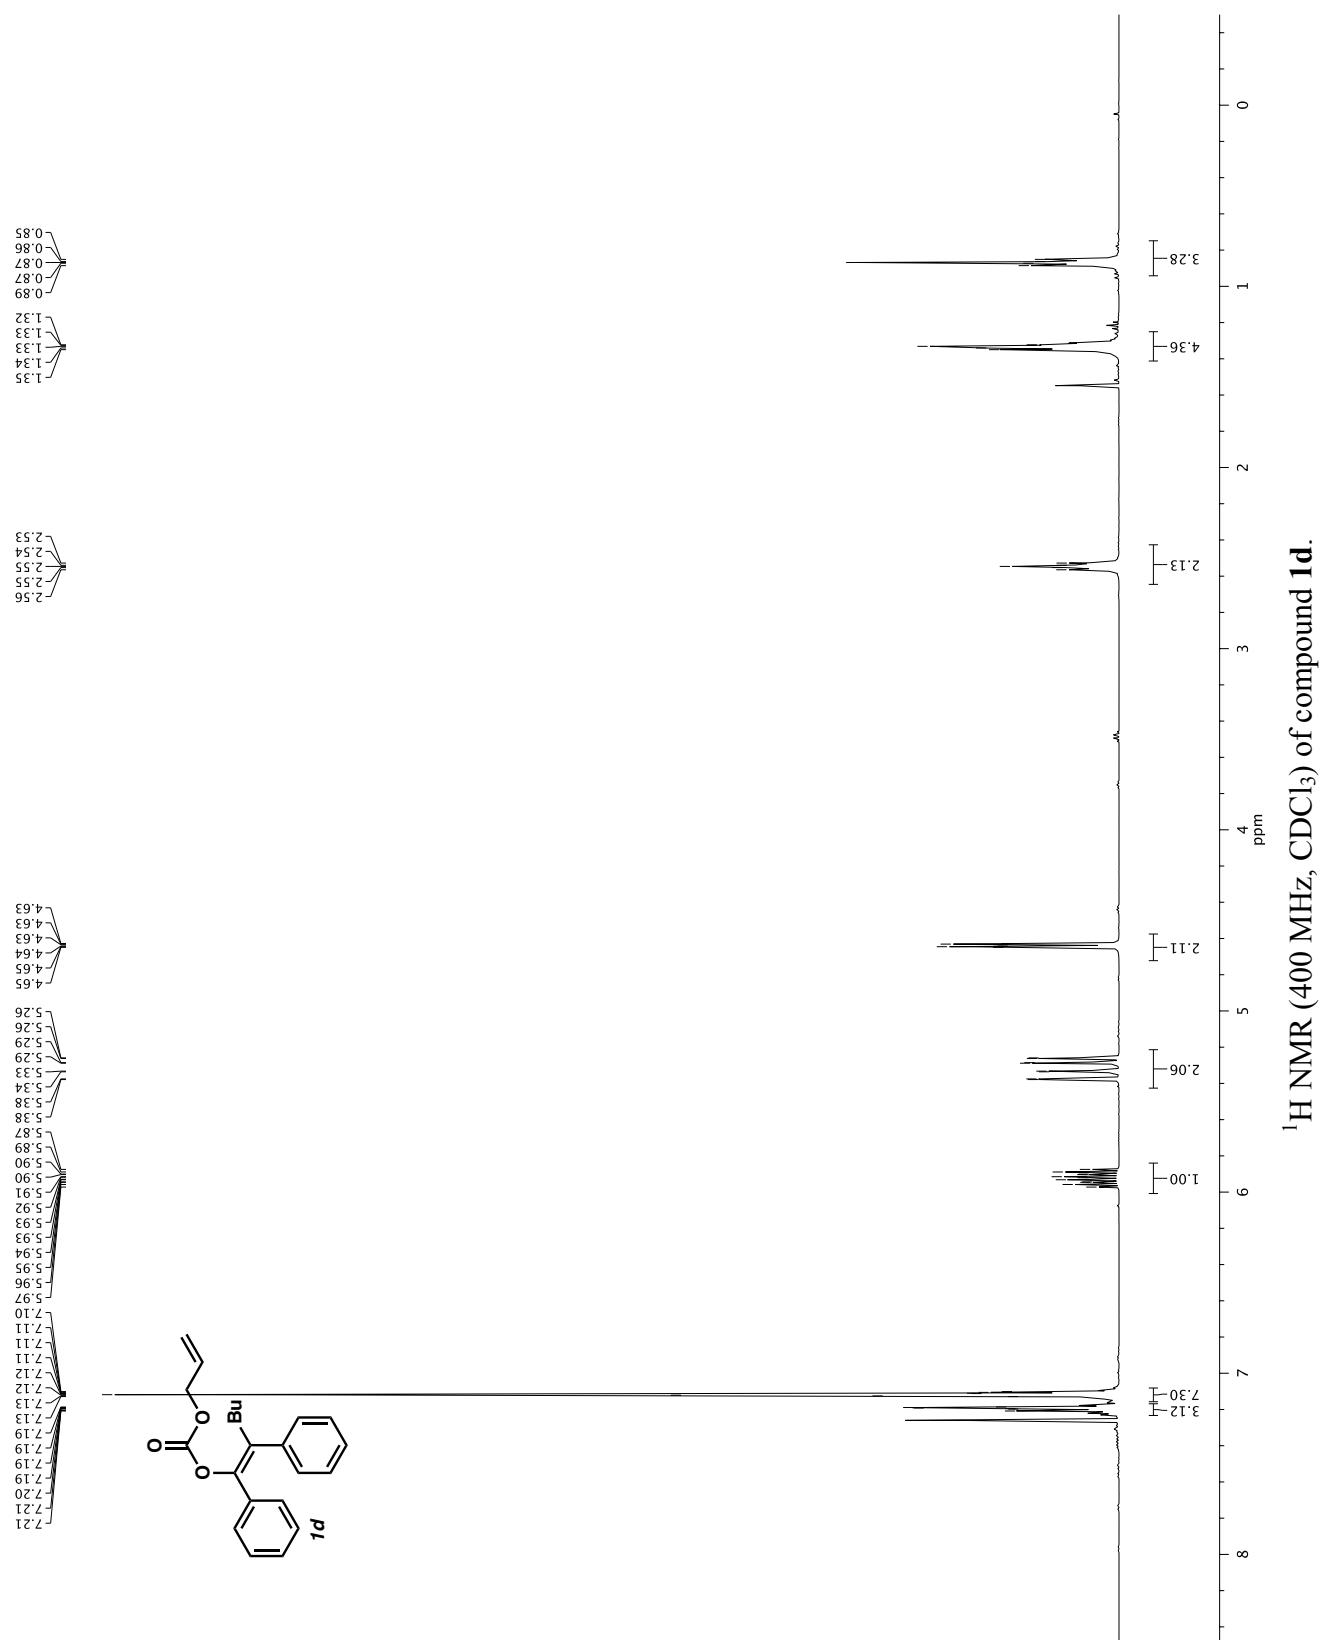

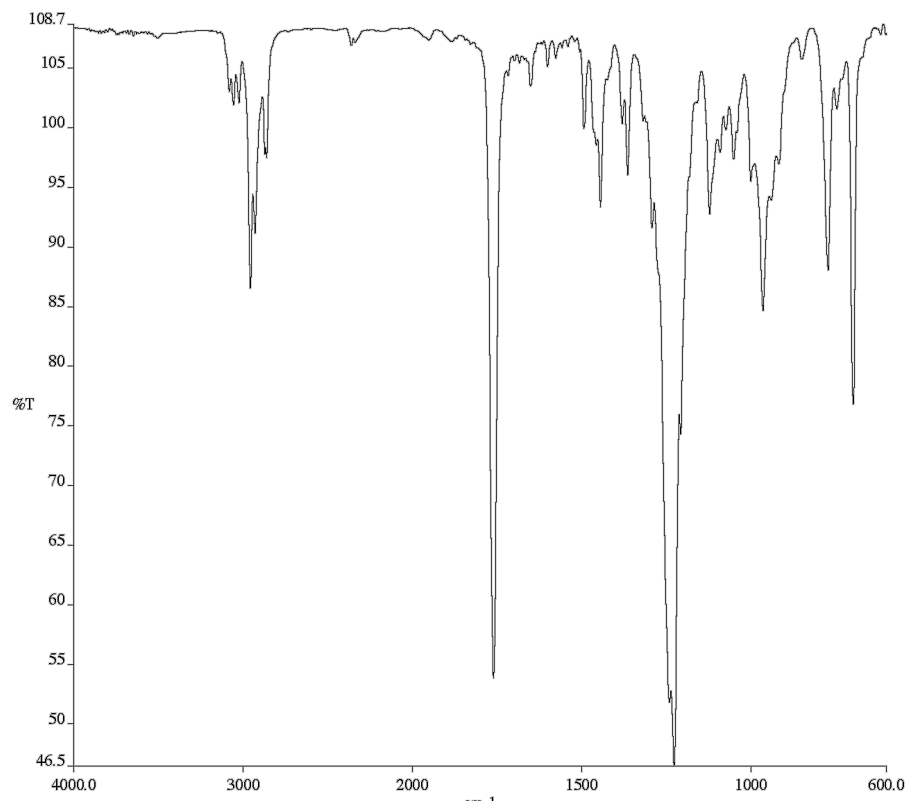Infrared spectrum (Thin Film, NaCl) of compound **1d**.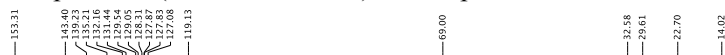<sup>13</sup>C NMR (100 MHz, CDCl<sub>3</sub>) of compound **1d**.

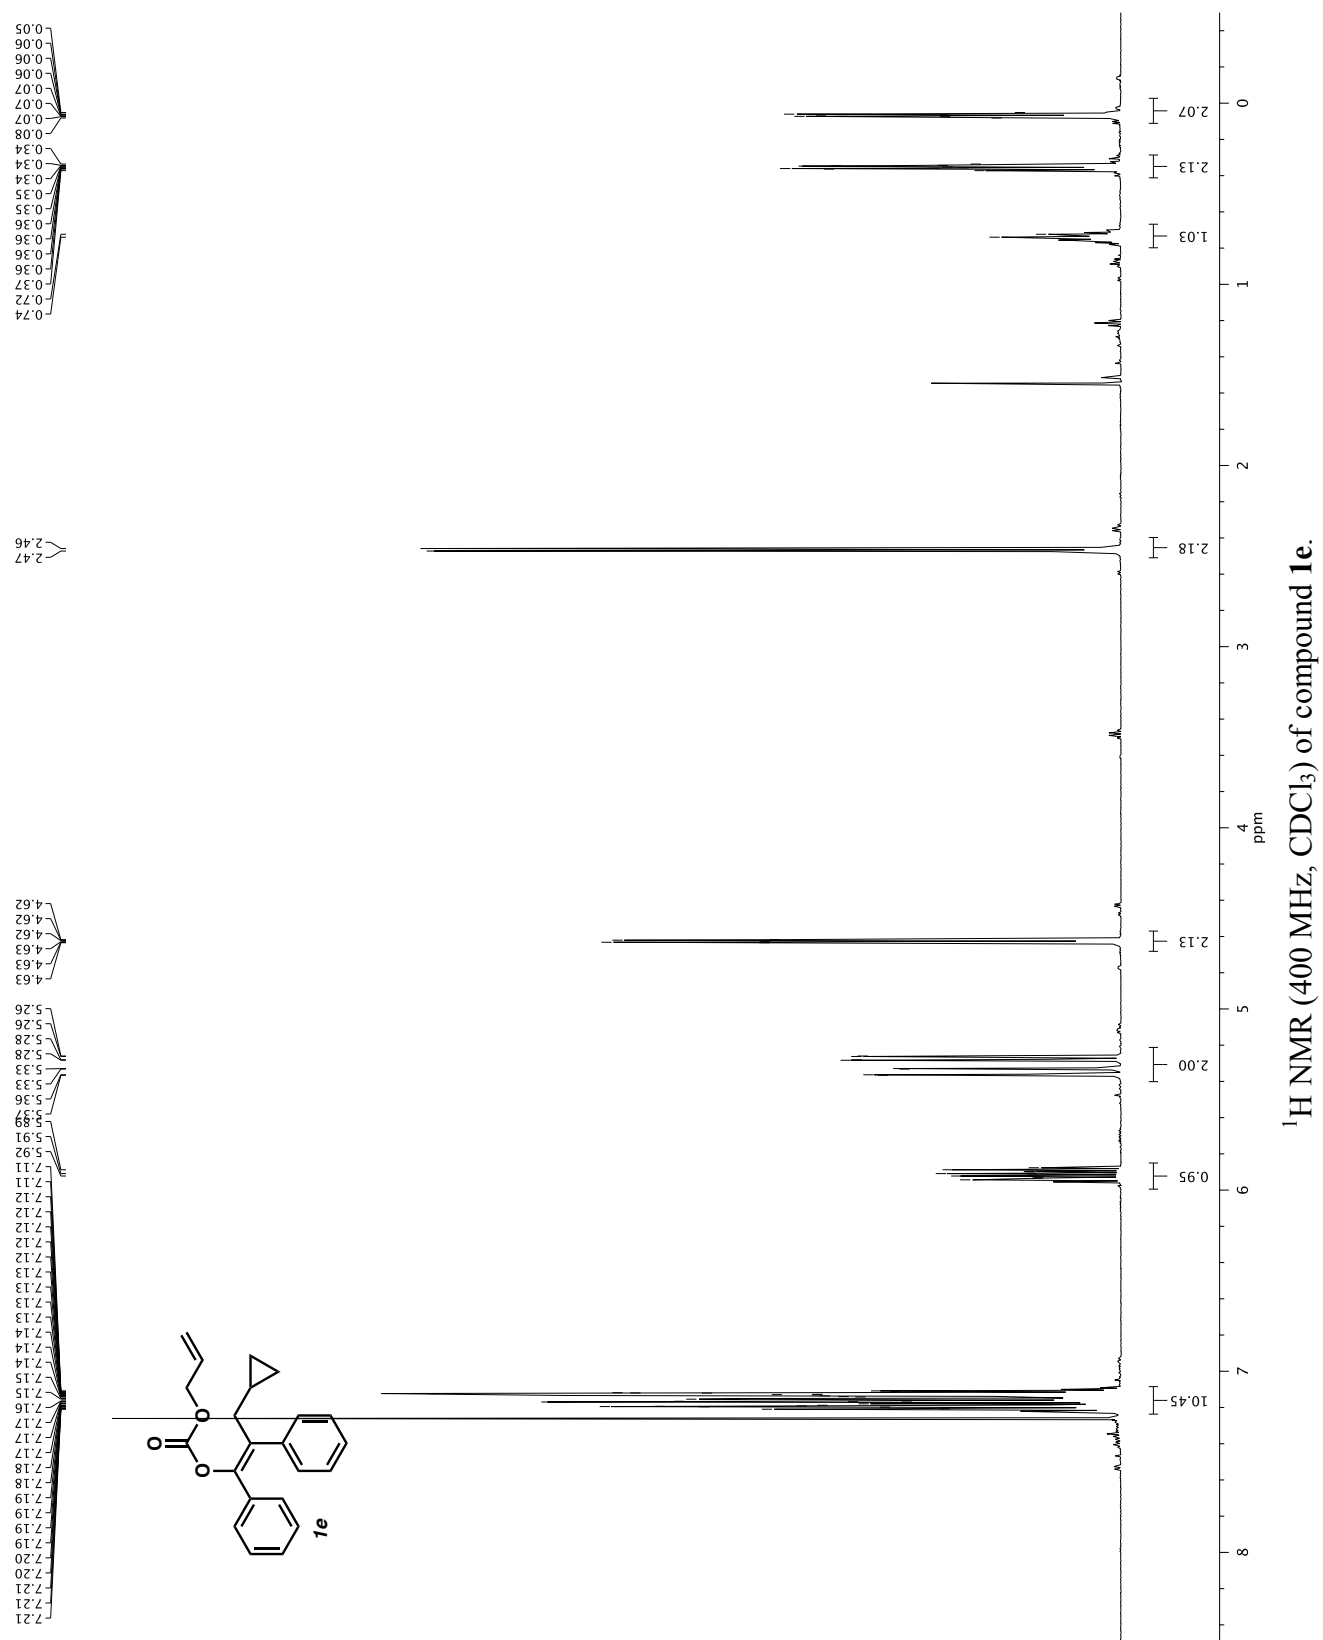



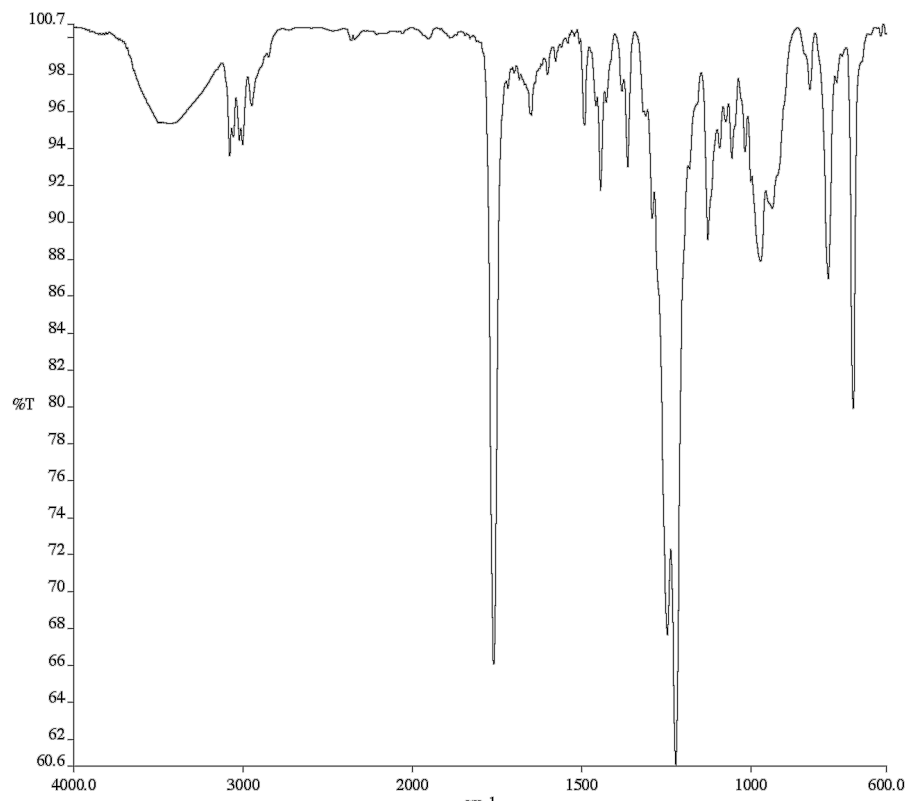Infrared spectrum (Thin Film, NaCl) of compound **1e**.

1532.8  
1432.8  
1395.6  
1353.1  
1331.4  
1311.4  
1290.4  
1288.2  
1277.0  
1101.8  
69.03  
37.48  
9.61  
4.74

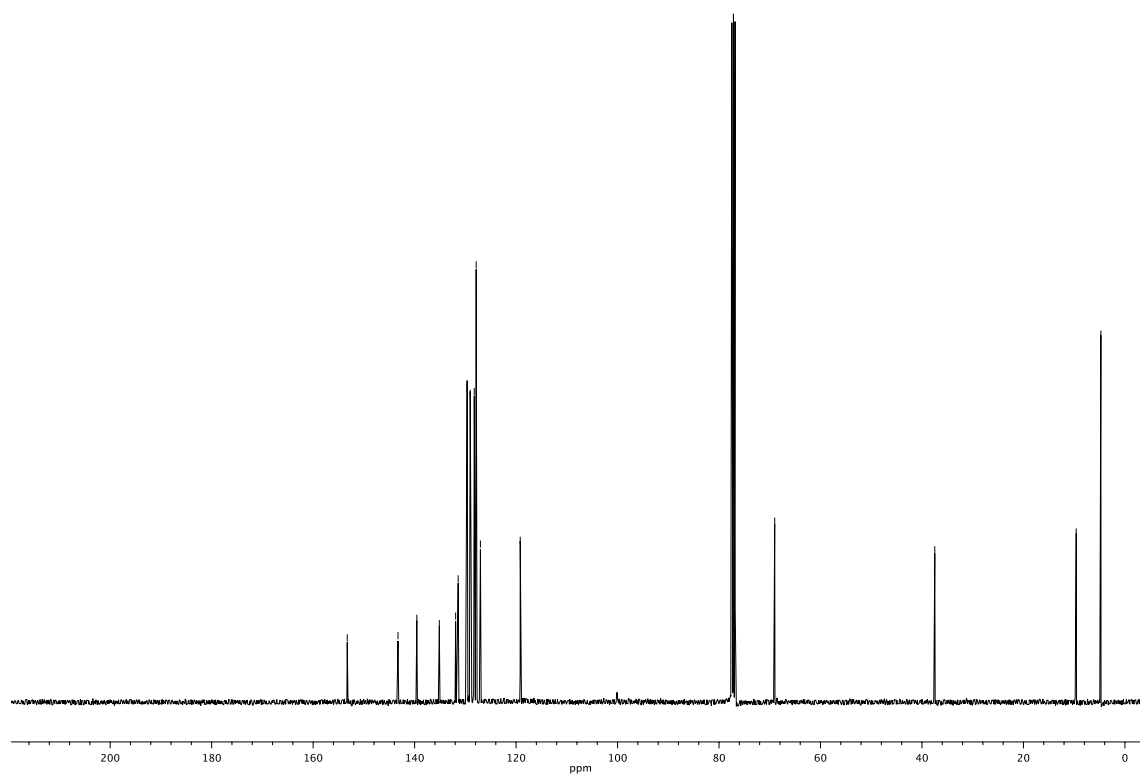<sup>13</sup>C NMR (100 MHz, CDCl<sub>3</sub>) of compound **1e**.

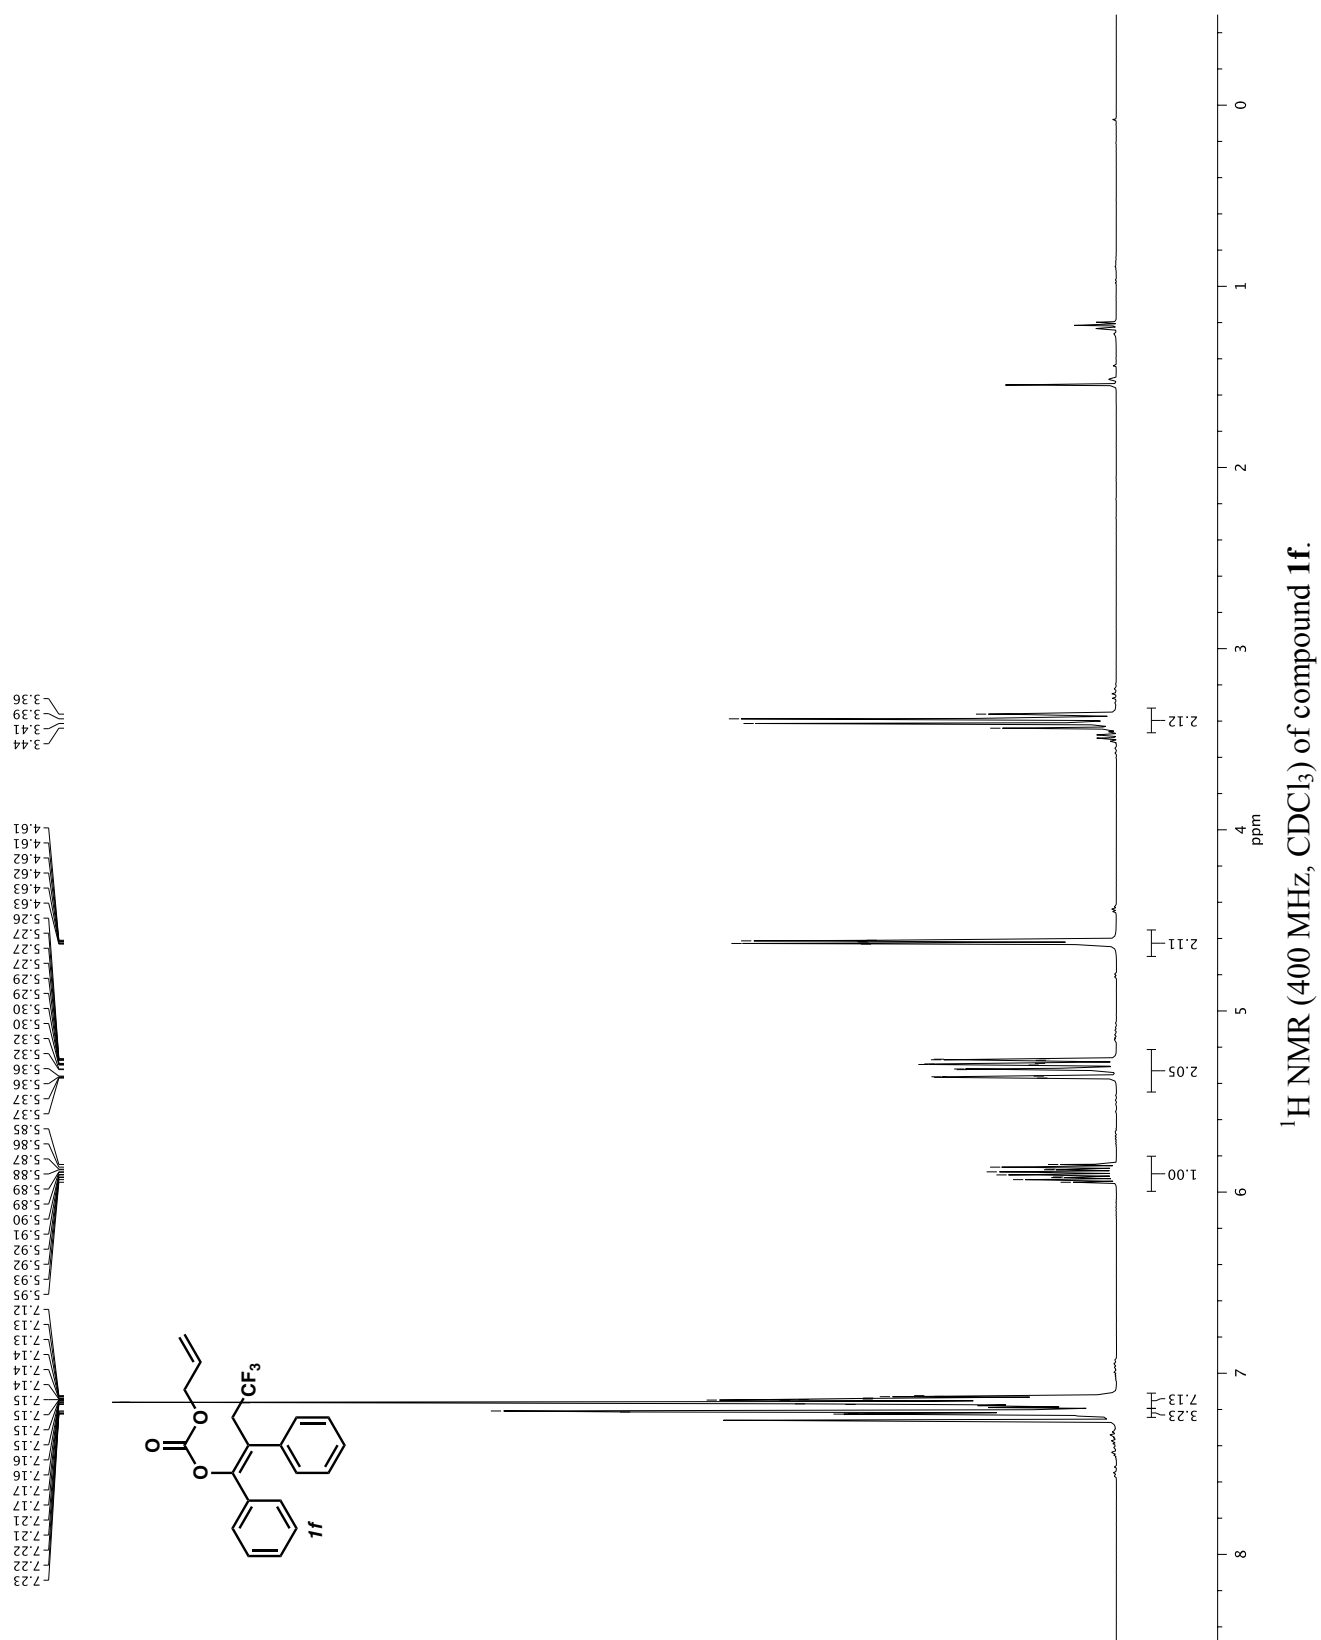

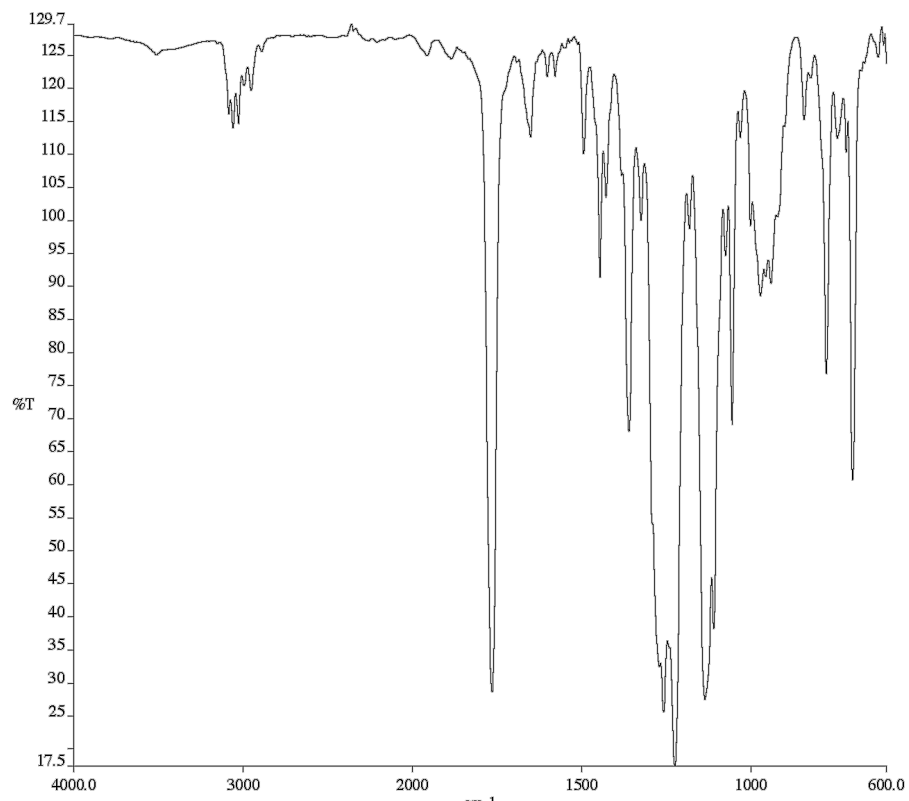Infrared spectrum (Thin Film, NaCl) of compound **1f**.

1522.49 1485.50 1377.65 1311.05 1292.87 1289.10 1288.57 1288.09 1277.10 1244.34 1205.59 1200.57 1190.60 69.42 17.77 17.47 17.17 16.87

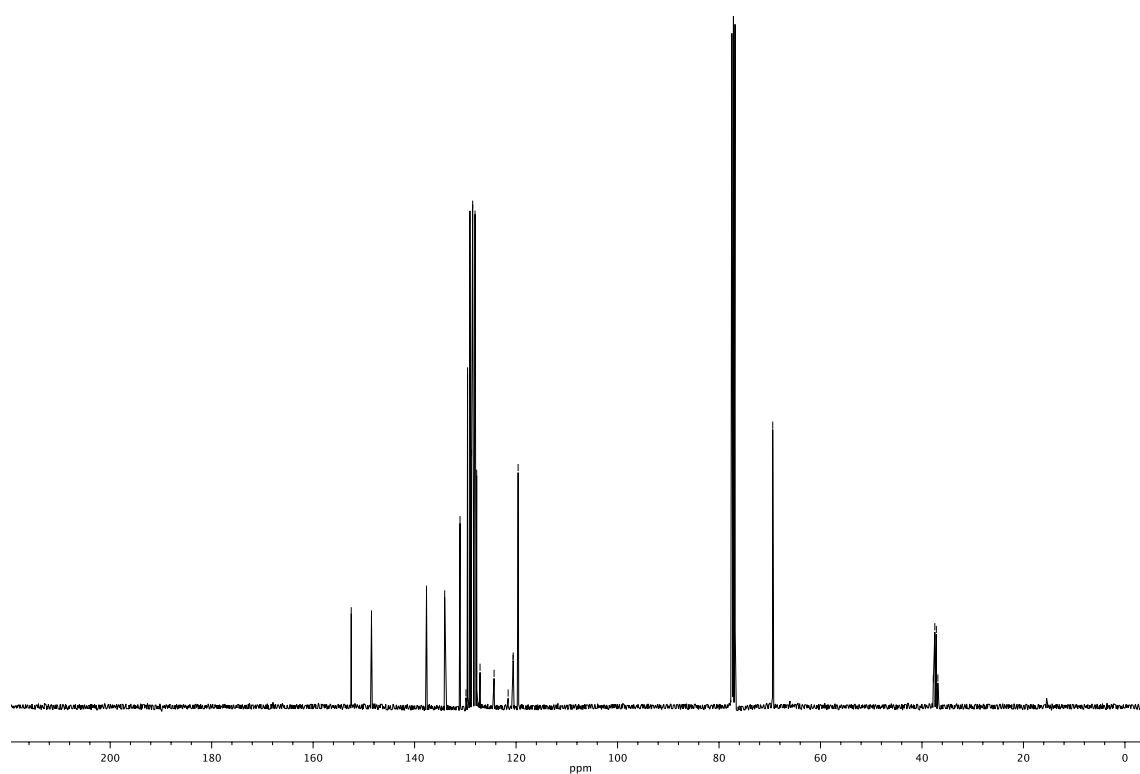<sup>13</sup>C NMR (100 MHz, CDCl<sub>3</sub>) of compound **1f**.

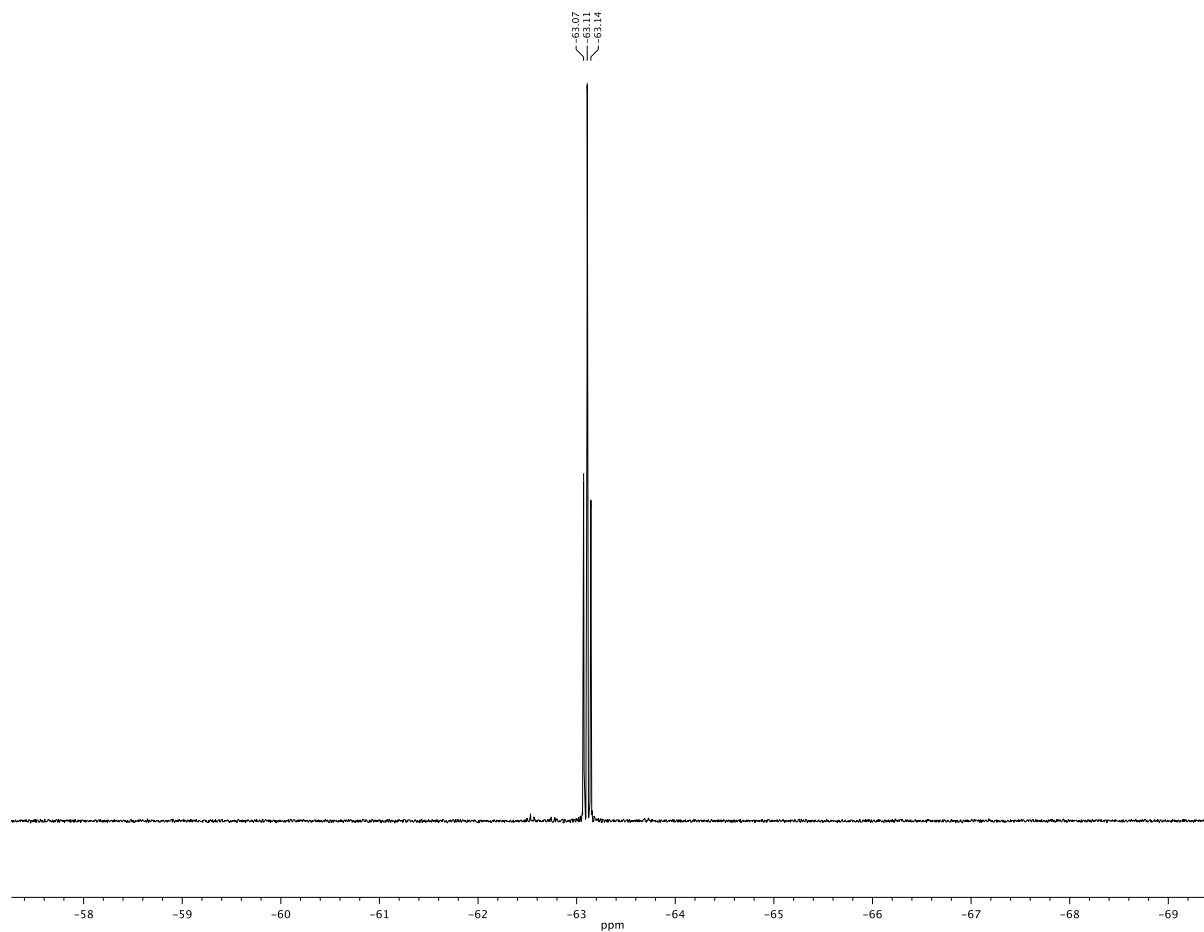

$^{19}\text{F}$  NMR (282 MHz,  $\text{CDCl}_3$ ) of compound **1f**.

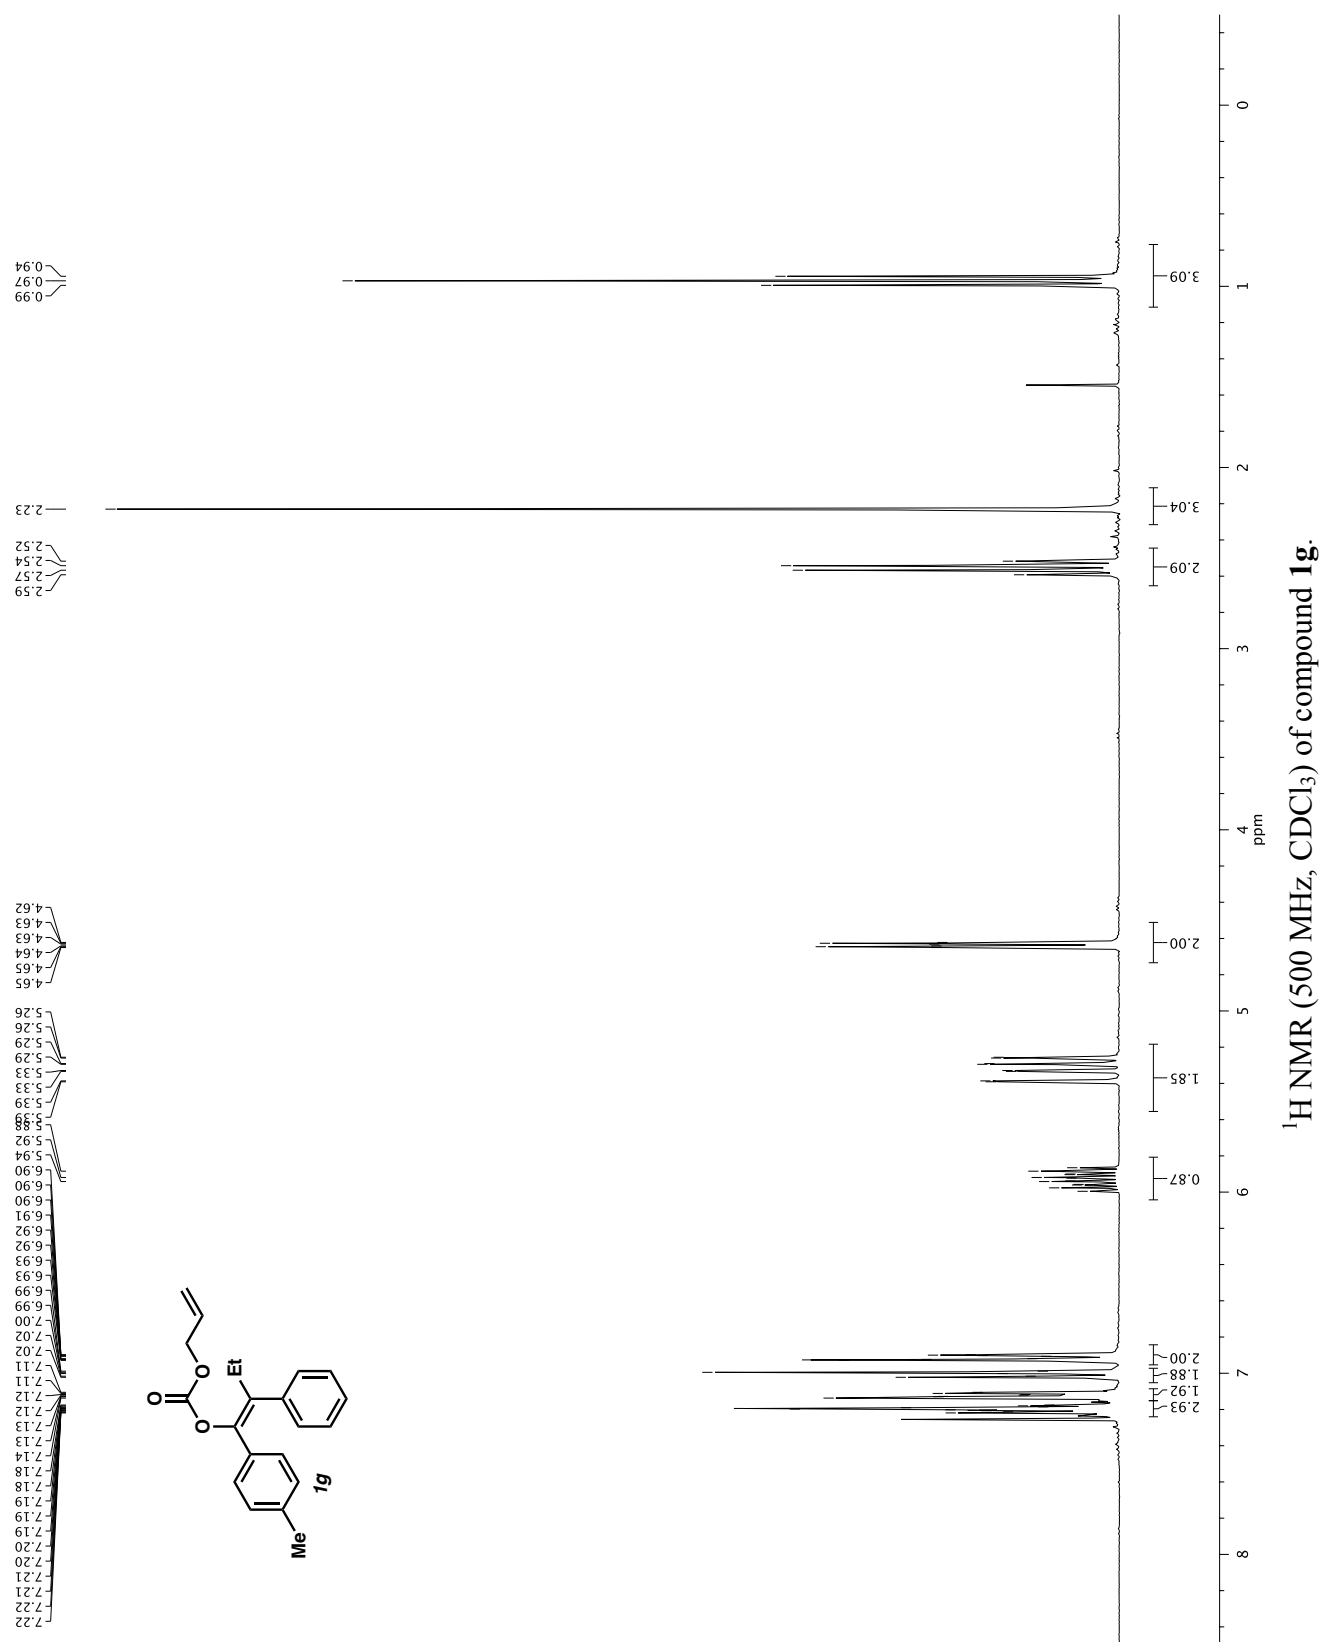

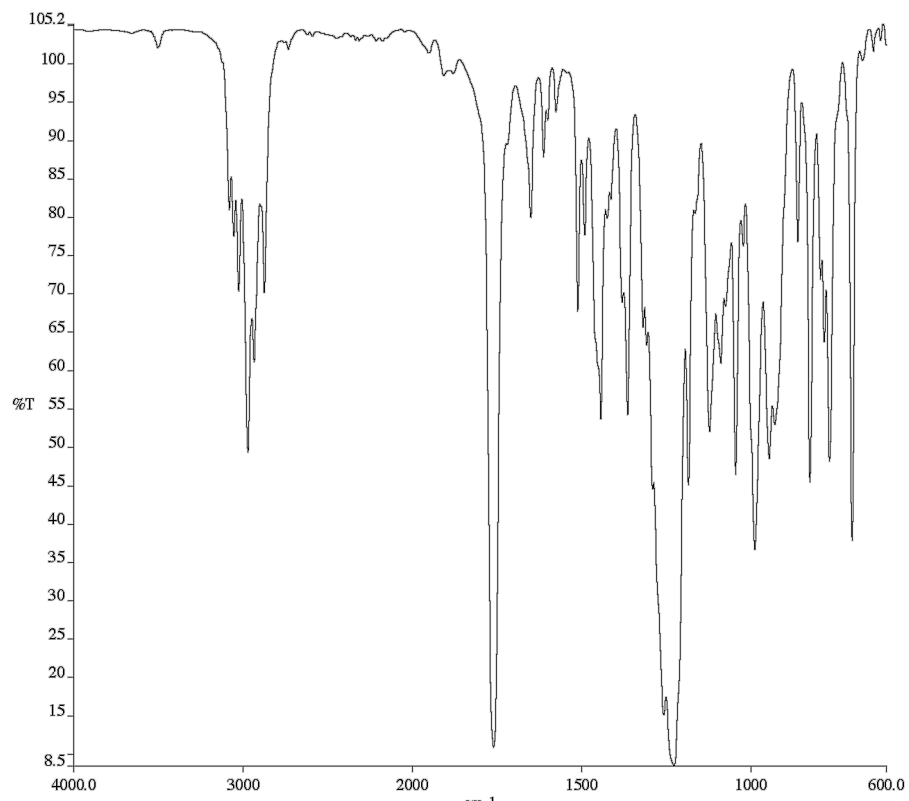Infrared spectrum (Thin Film, NaCl) of compound **1g**.

1512.38  
1413.09  
1395.18  
1372.66  
1352.24  
1327.56  
1297.56  
1288.82  
1286.85  
1277.02  
1119.15  
68.99  
26.13  
21.38  
12.30

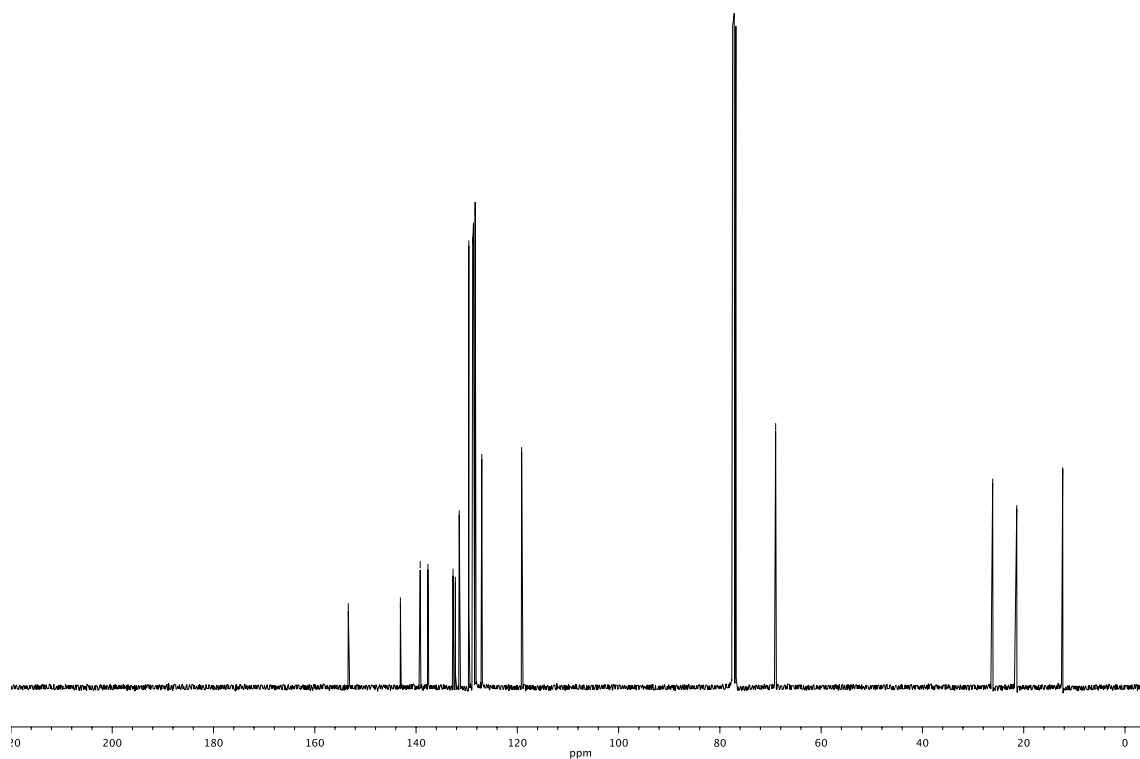 $^{13}\text{C}$  NMR (100 MHz,  $\text{CDCl}_3$ ) of compound **1g**.

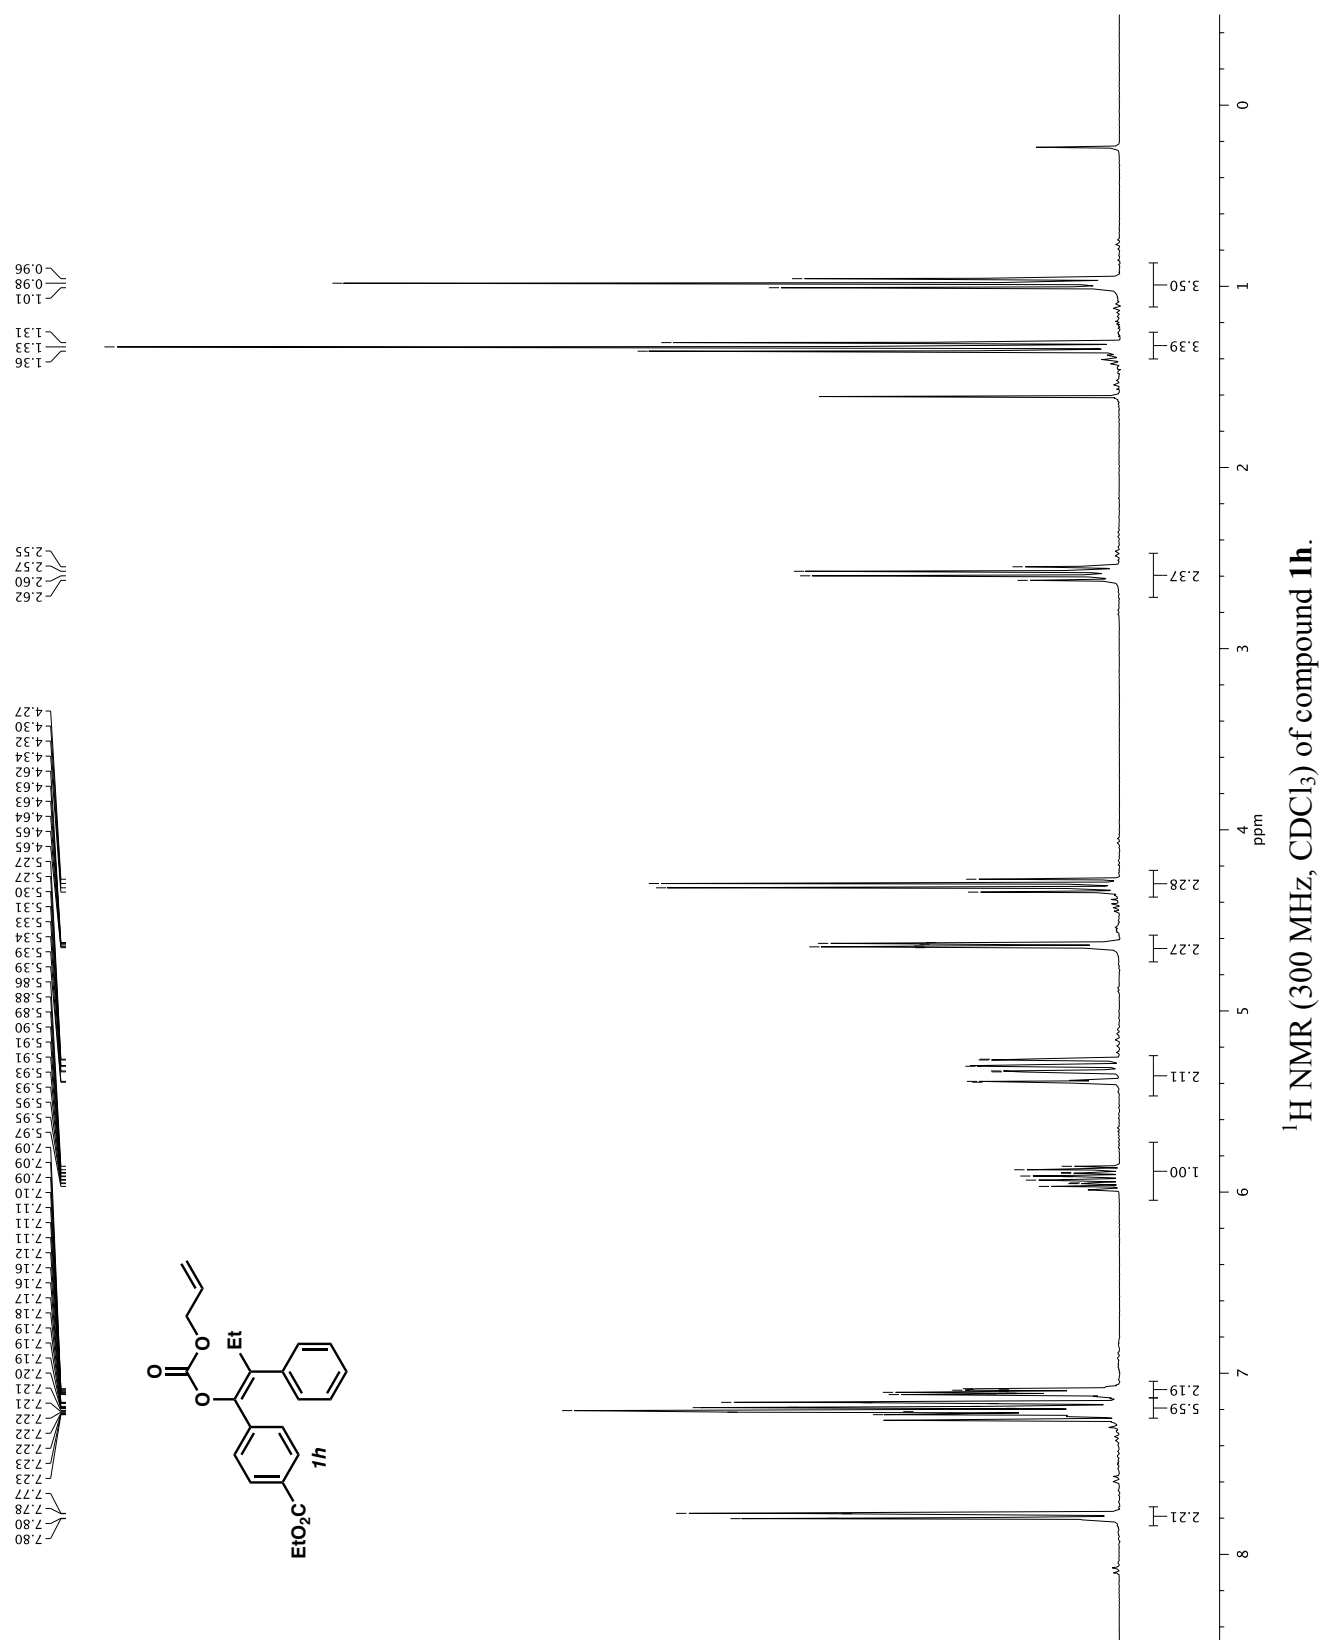

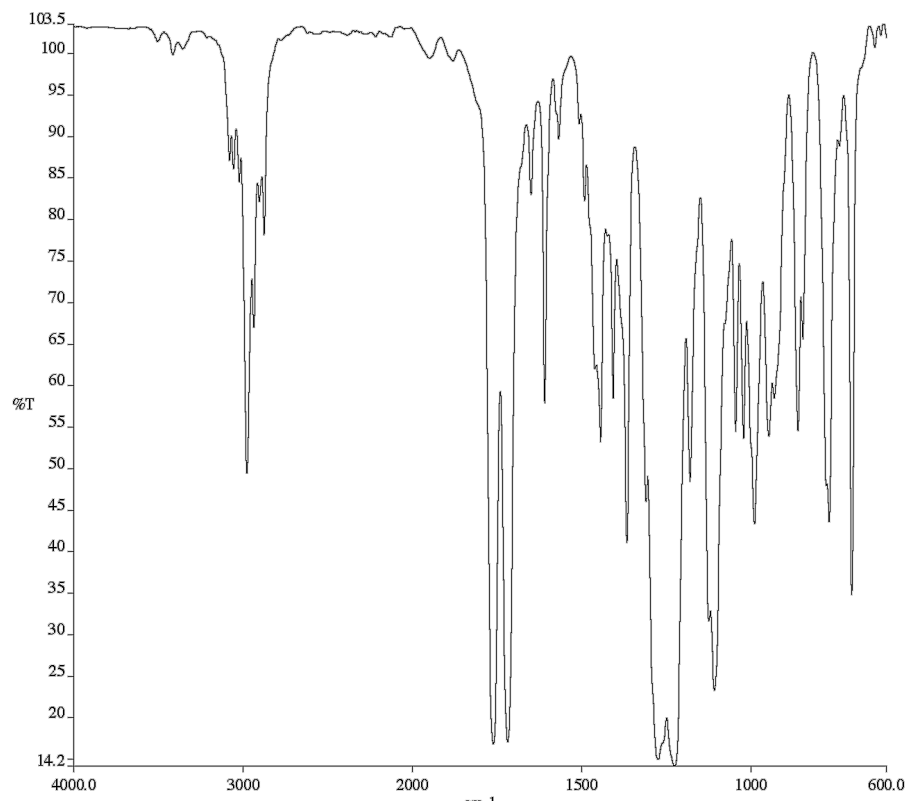Infrared spectrum (Thin Film, NaCl) of compound **1h**.

166.29 153.25 147.02 139.70 138.49 137.28 131.25 129.51 129.16 128.79 127.52 119.43 69.21 61.04 26.29 14.43 12.16

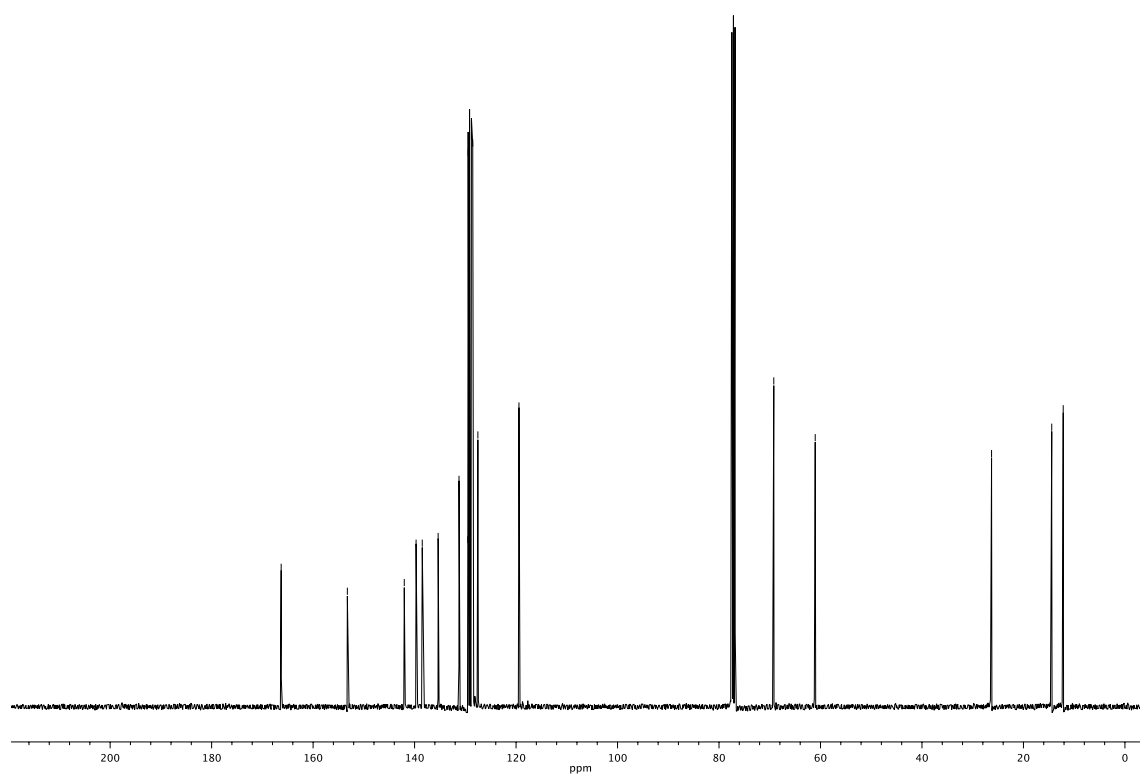 $^{13}\text{C}$  NMR (100 MHz,  $\text{CDCl}_3$ ) of compound **1h**.



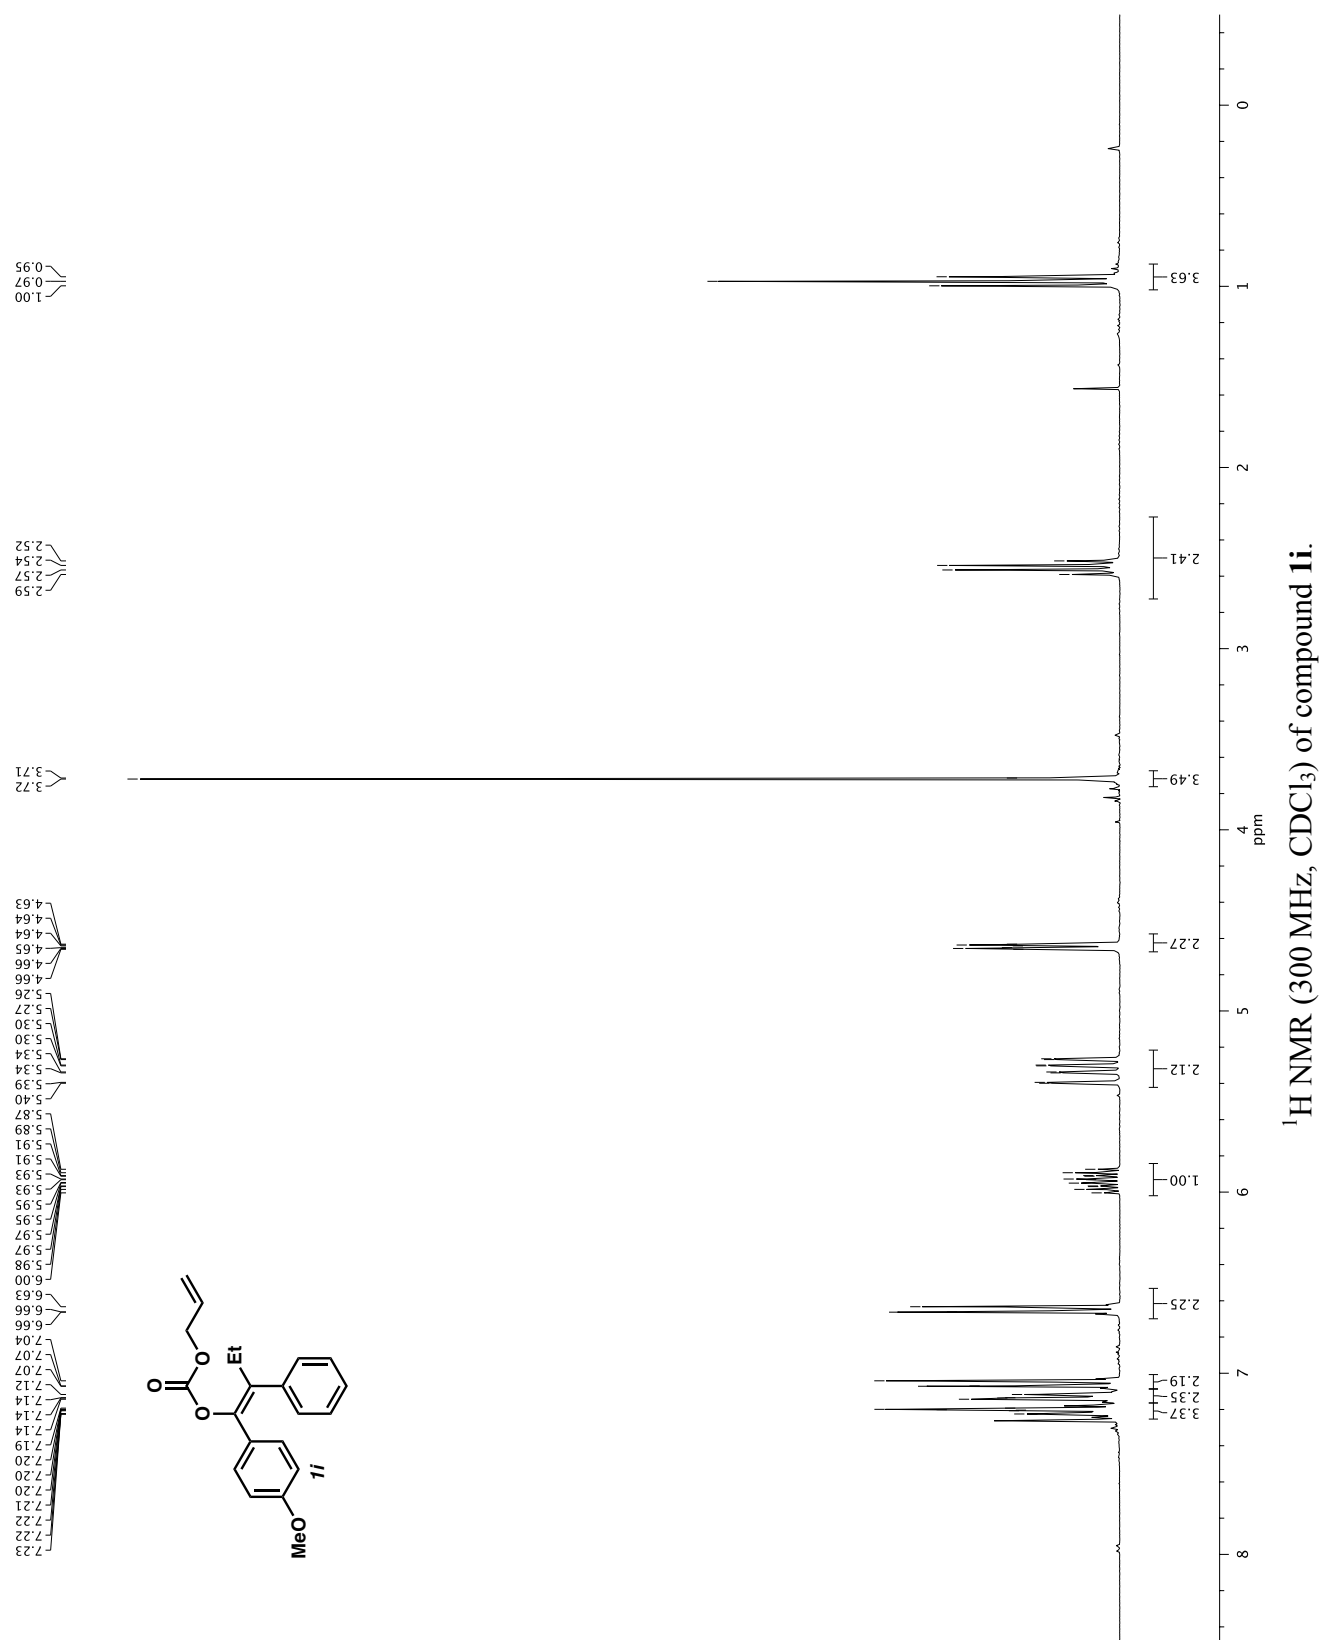

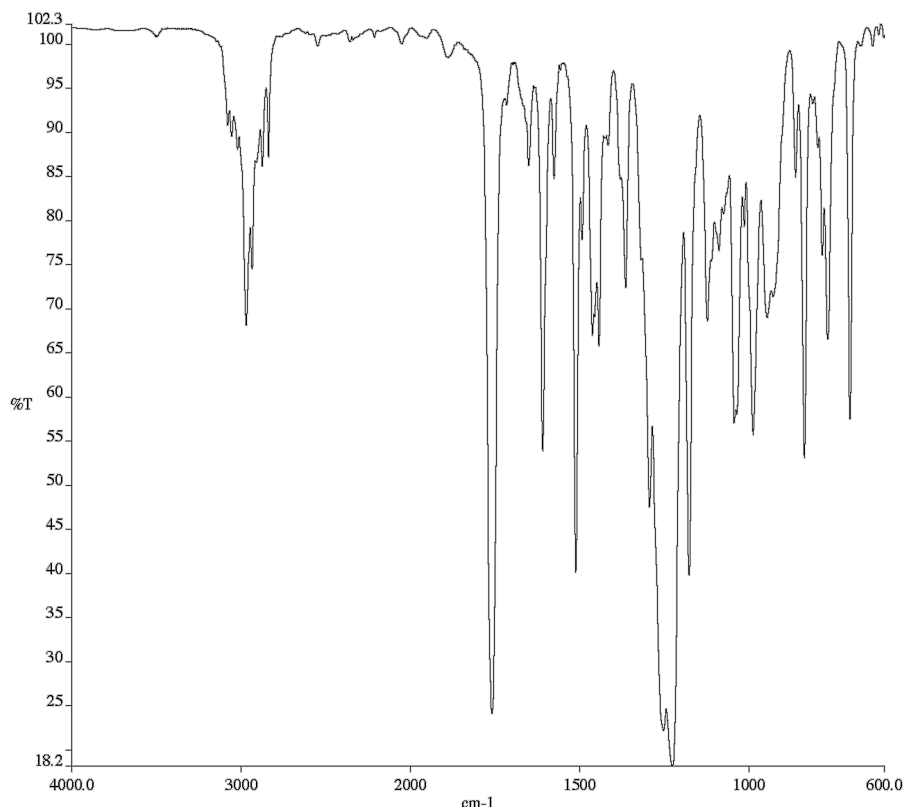Infrared spectrum (Thin Film, NaCl) of compound **1i**.

1599.01  
1533.40  
1472.88  
1399.23  
1327.12  
1311.47  
1306.30  
1288.83  
1277.61  
1266.94  
1199.16  
1133.34  
68.99  
55.20  
26.04  
12.33

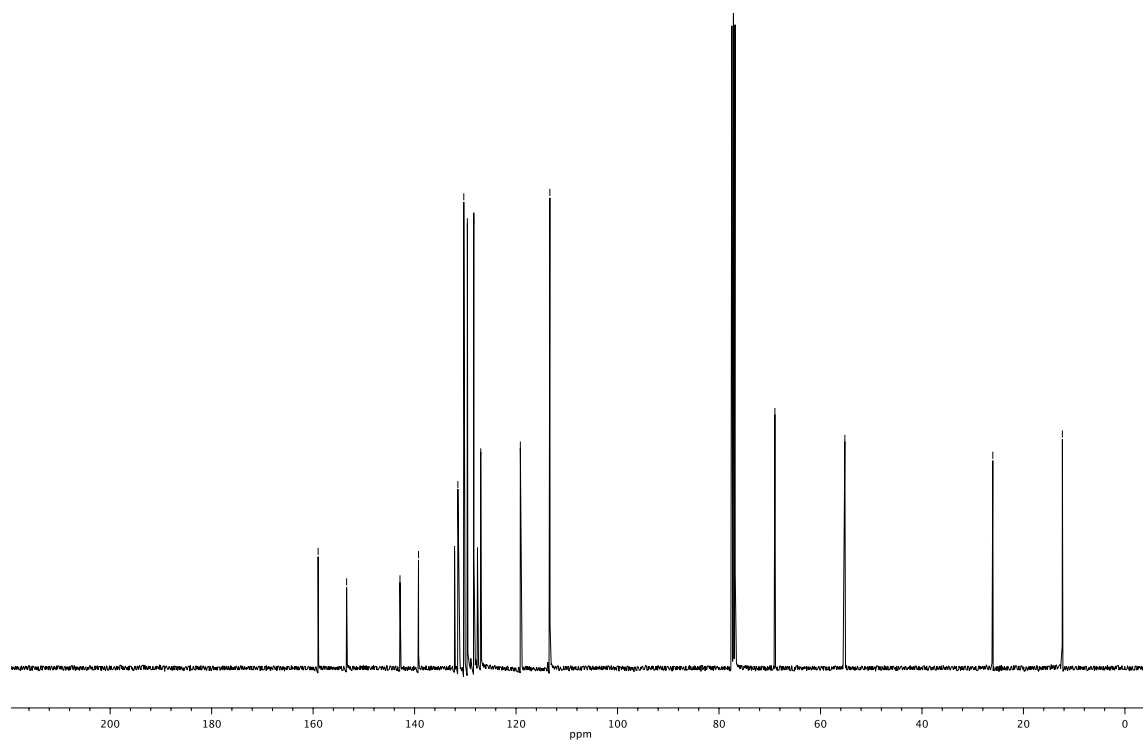<sup>13</sup>C NMR (100 MHz, CDCl<sub>3</sub>) of compound **1i**.

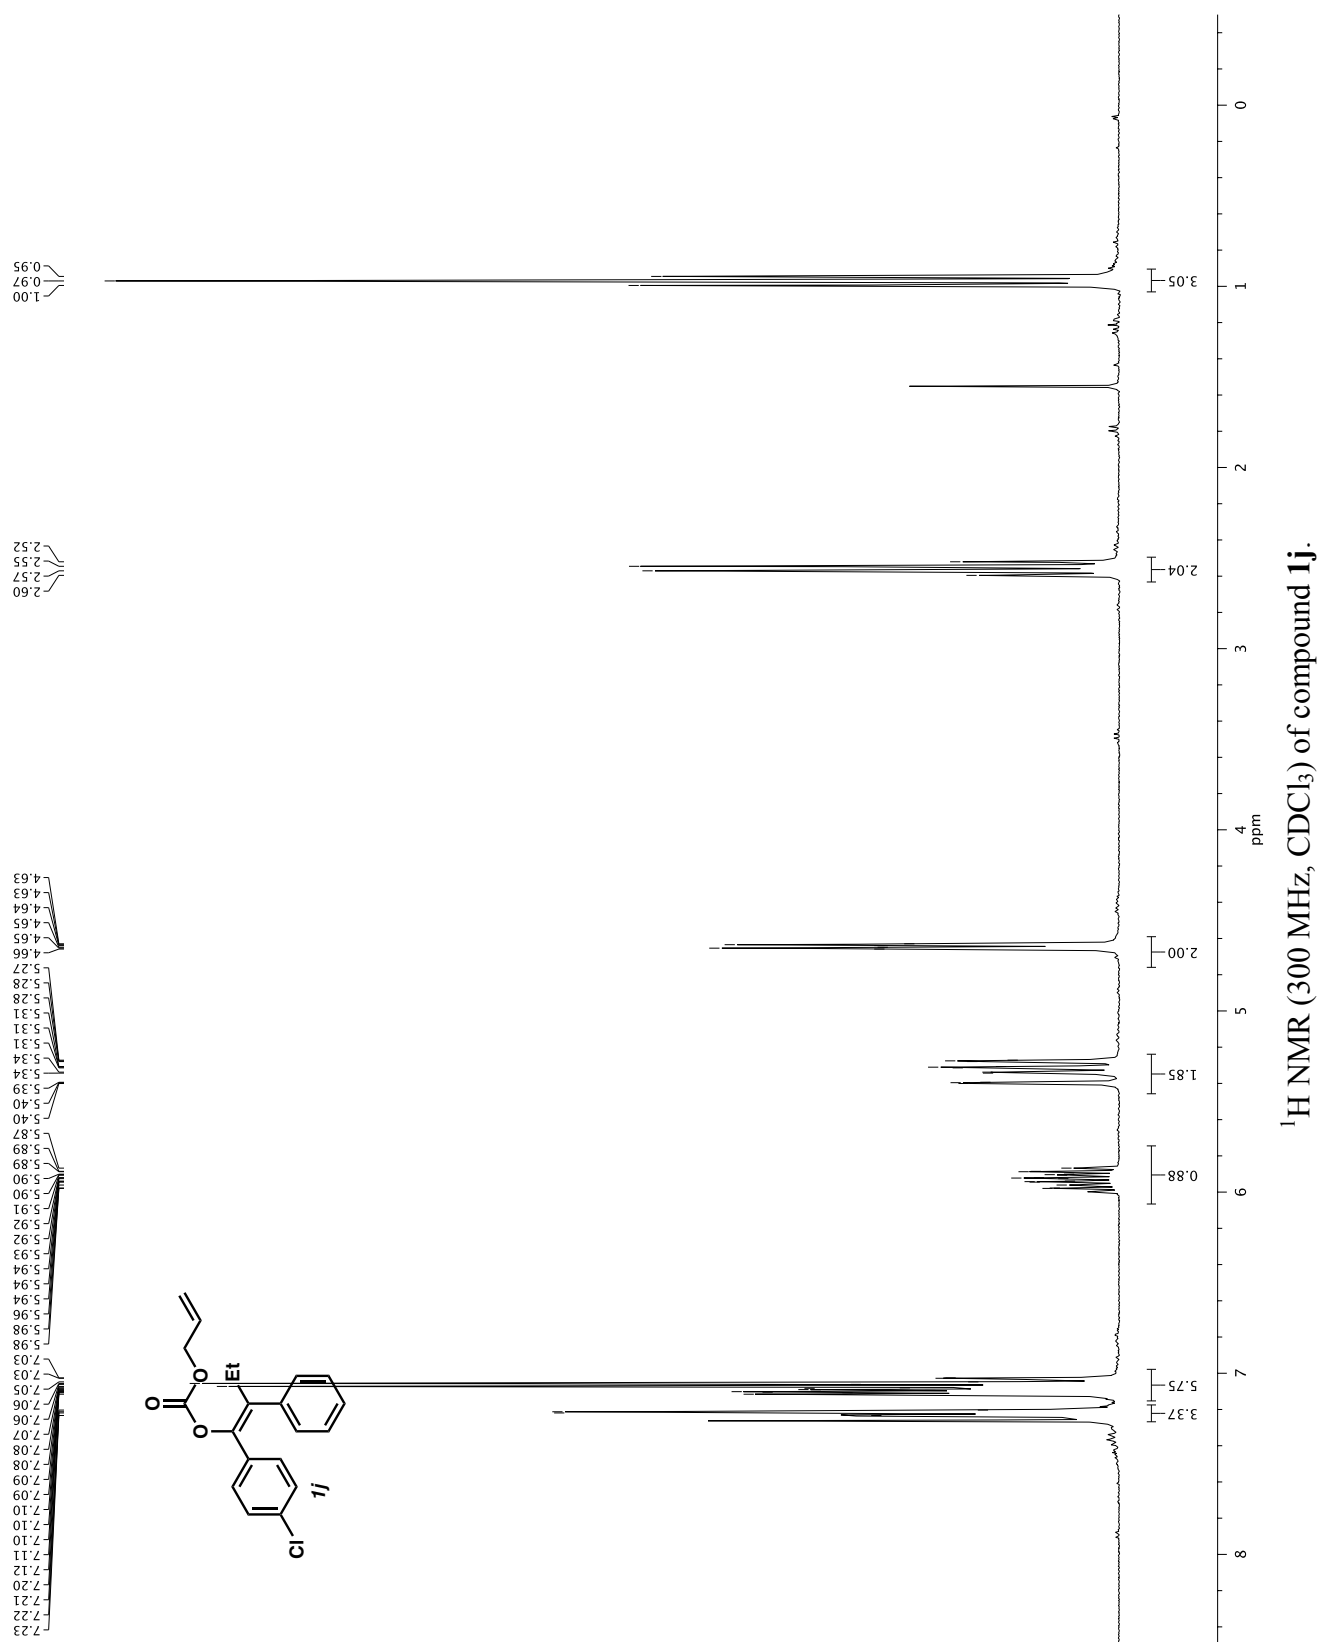

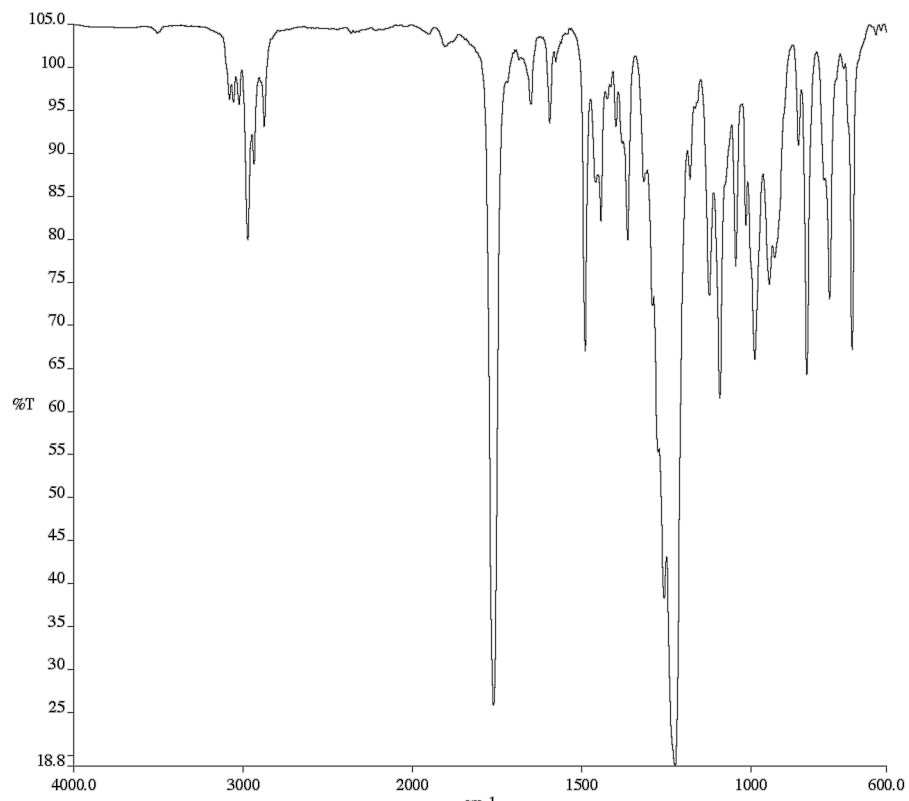Infrared spectrum (Thin Film, NaCl) of compound **1j**.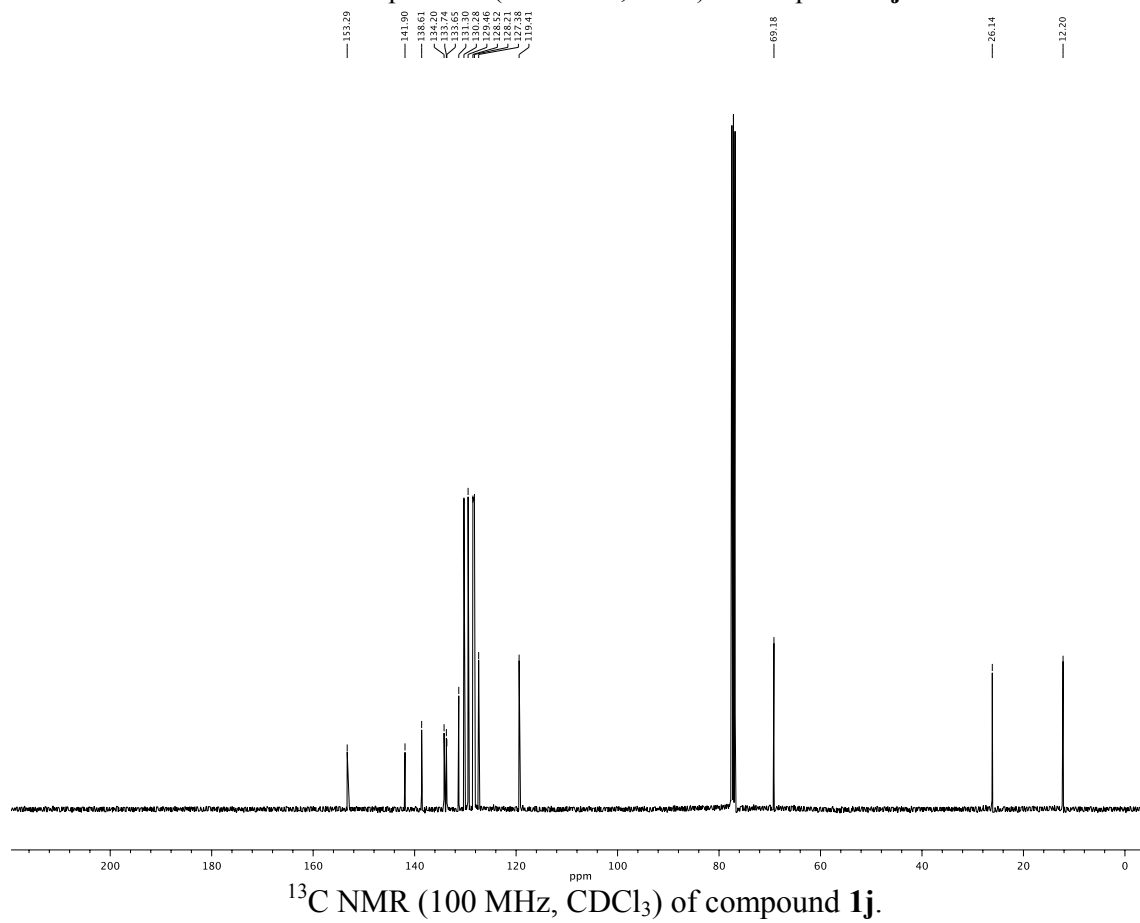

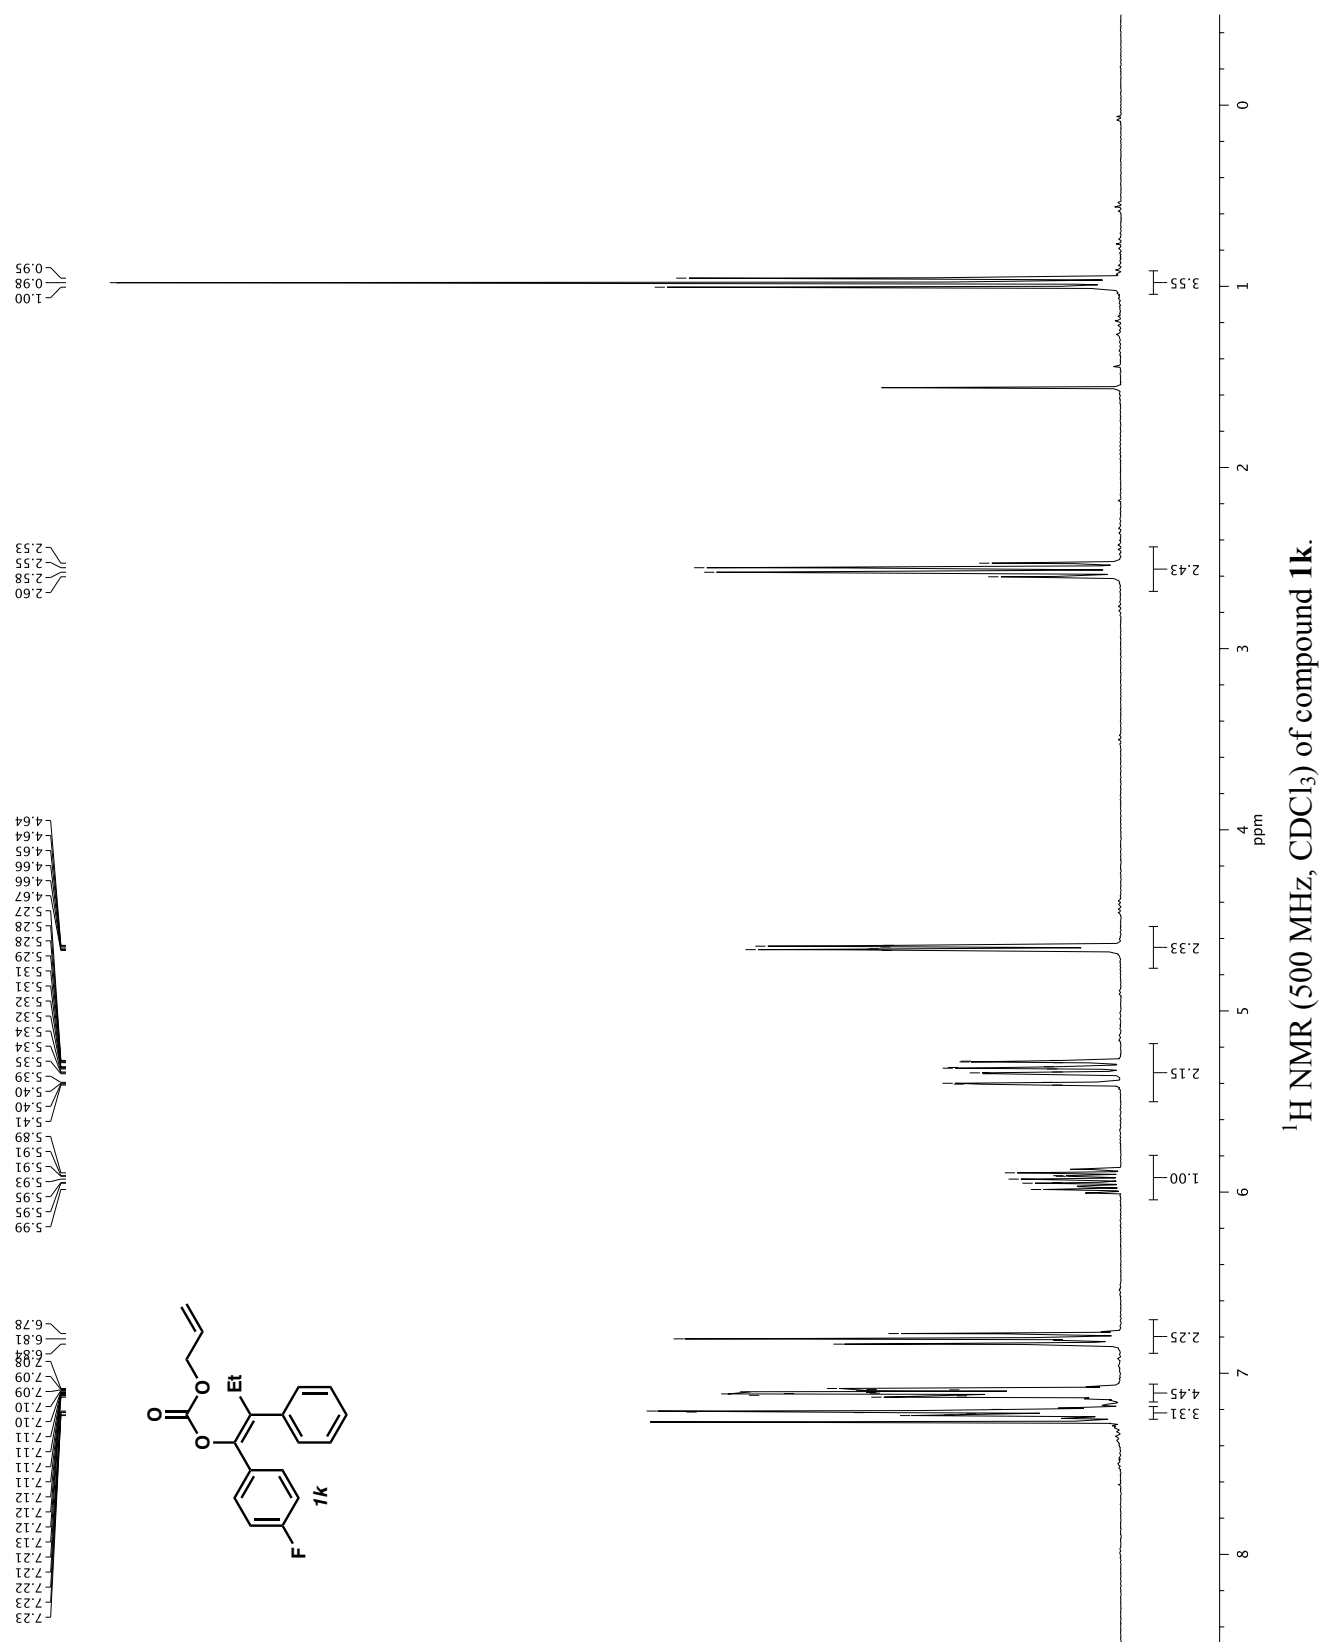

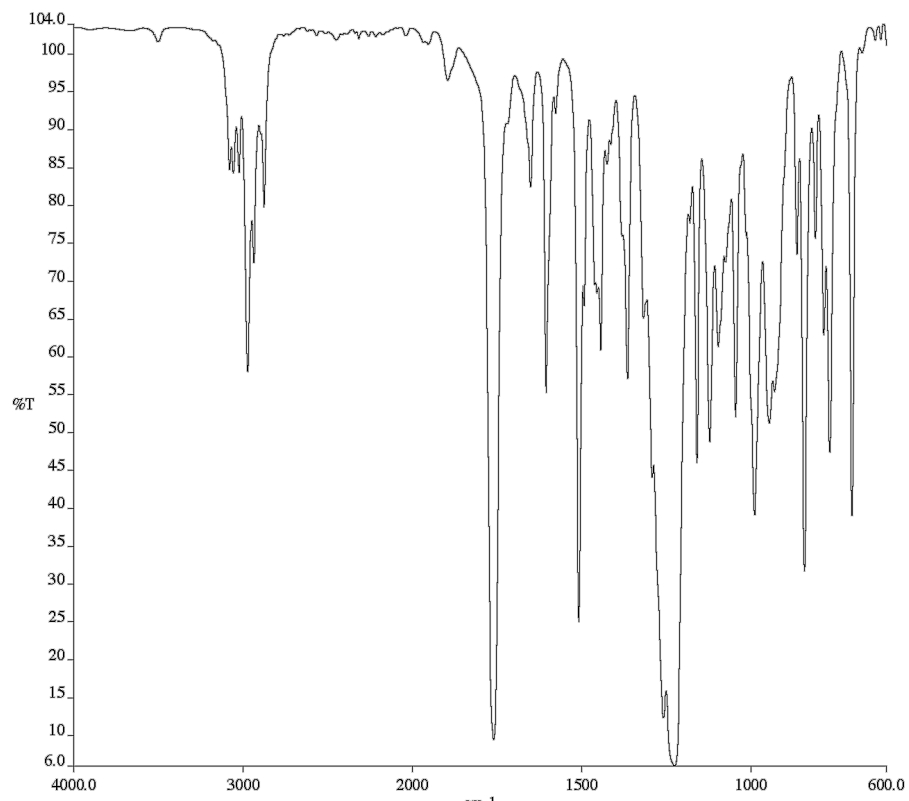Infrared spectrum (Thin Film, NaCl) of compound **1k**.

1653.34  
1608.87  
1553.31  
1442.08  
1385.57  
1371.46  
1331.36  
1300.93  
1290.82  
1288.43  
1277.25  
1193.34  
1152.10  
1144.88  
89.13  
26.03  
12.24

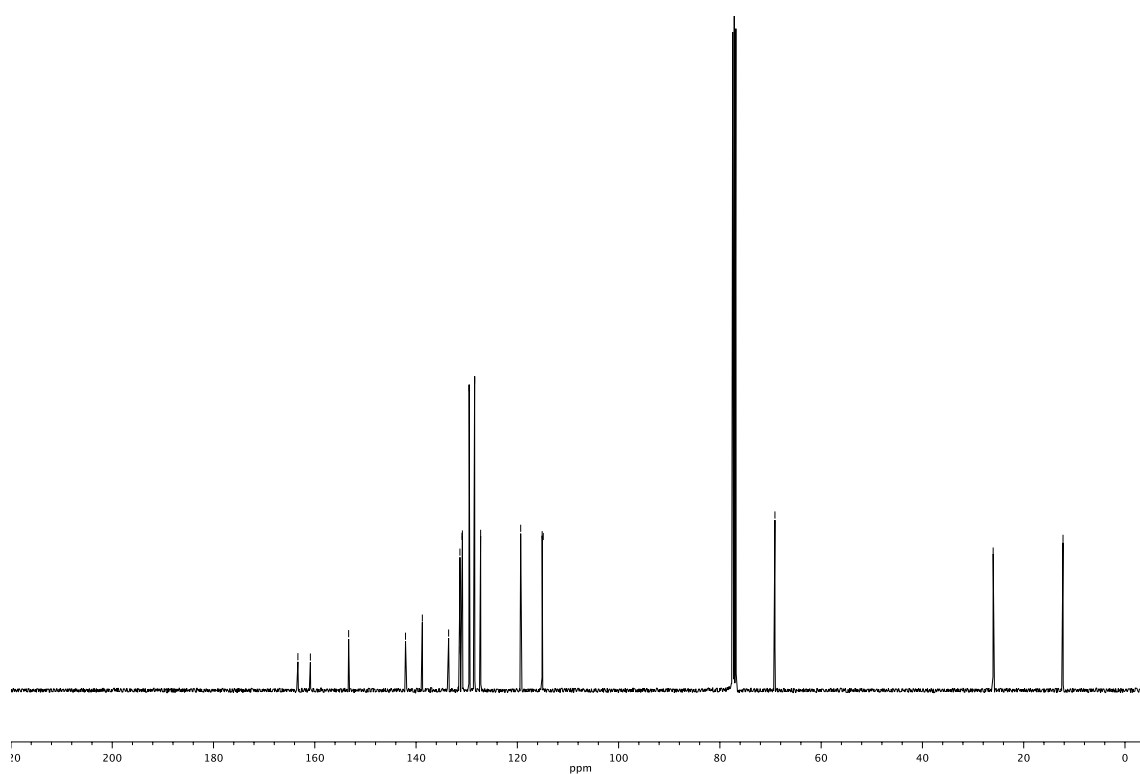 $^{13}\text{C}$  NMR (100 MHz,  $\text{CDCl}_3$ ) of compound **1k**.

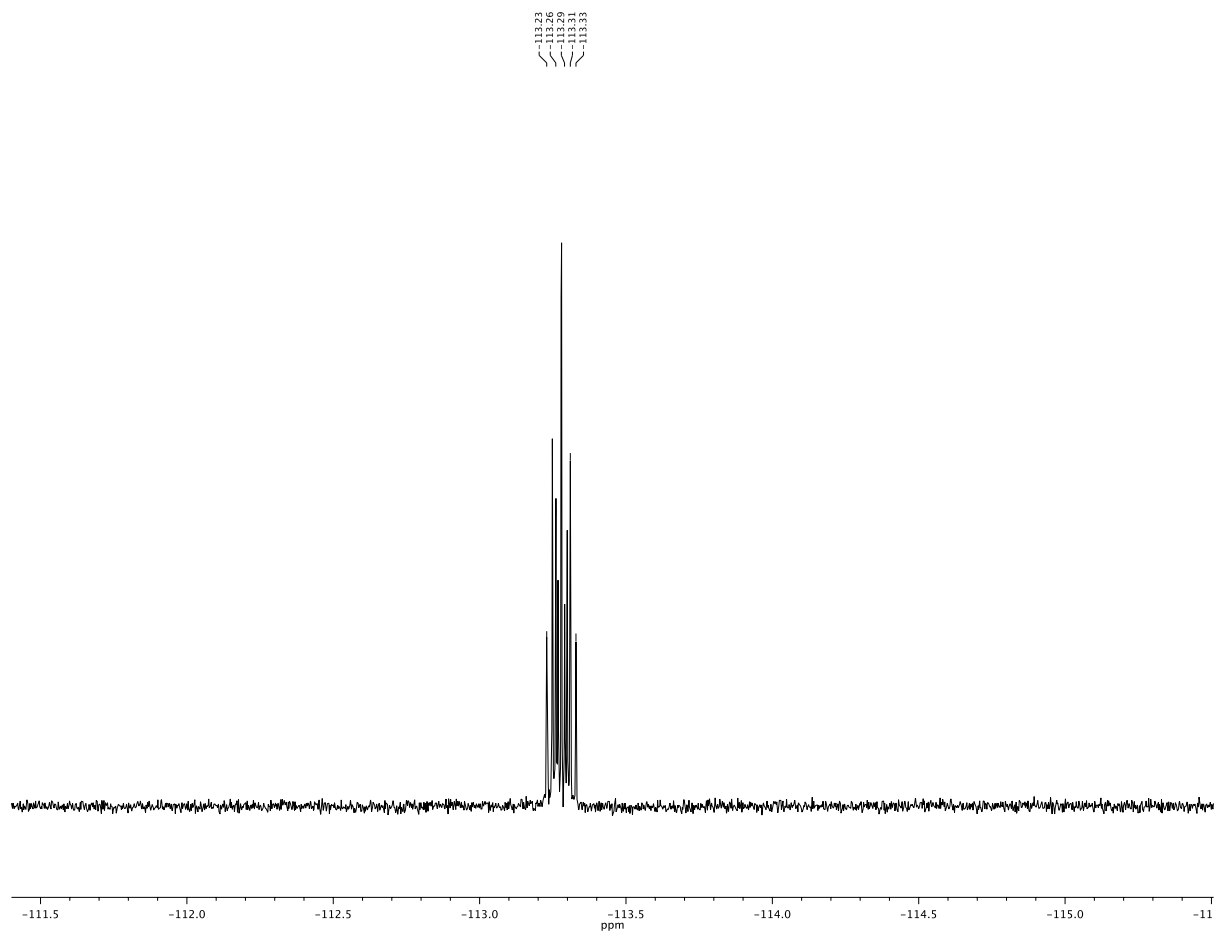

$^{19}\text{F}$  NMR (282 MHz,  $\text{CDCl}_3$ ) of compound **1k**.

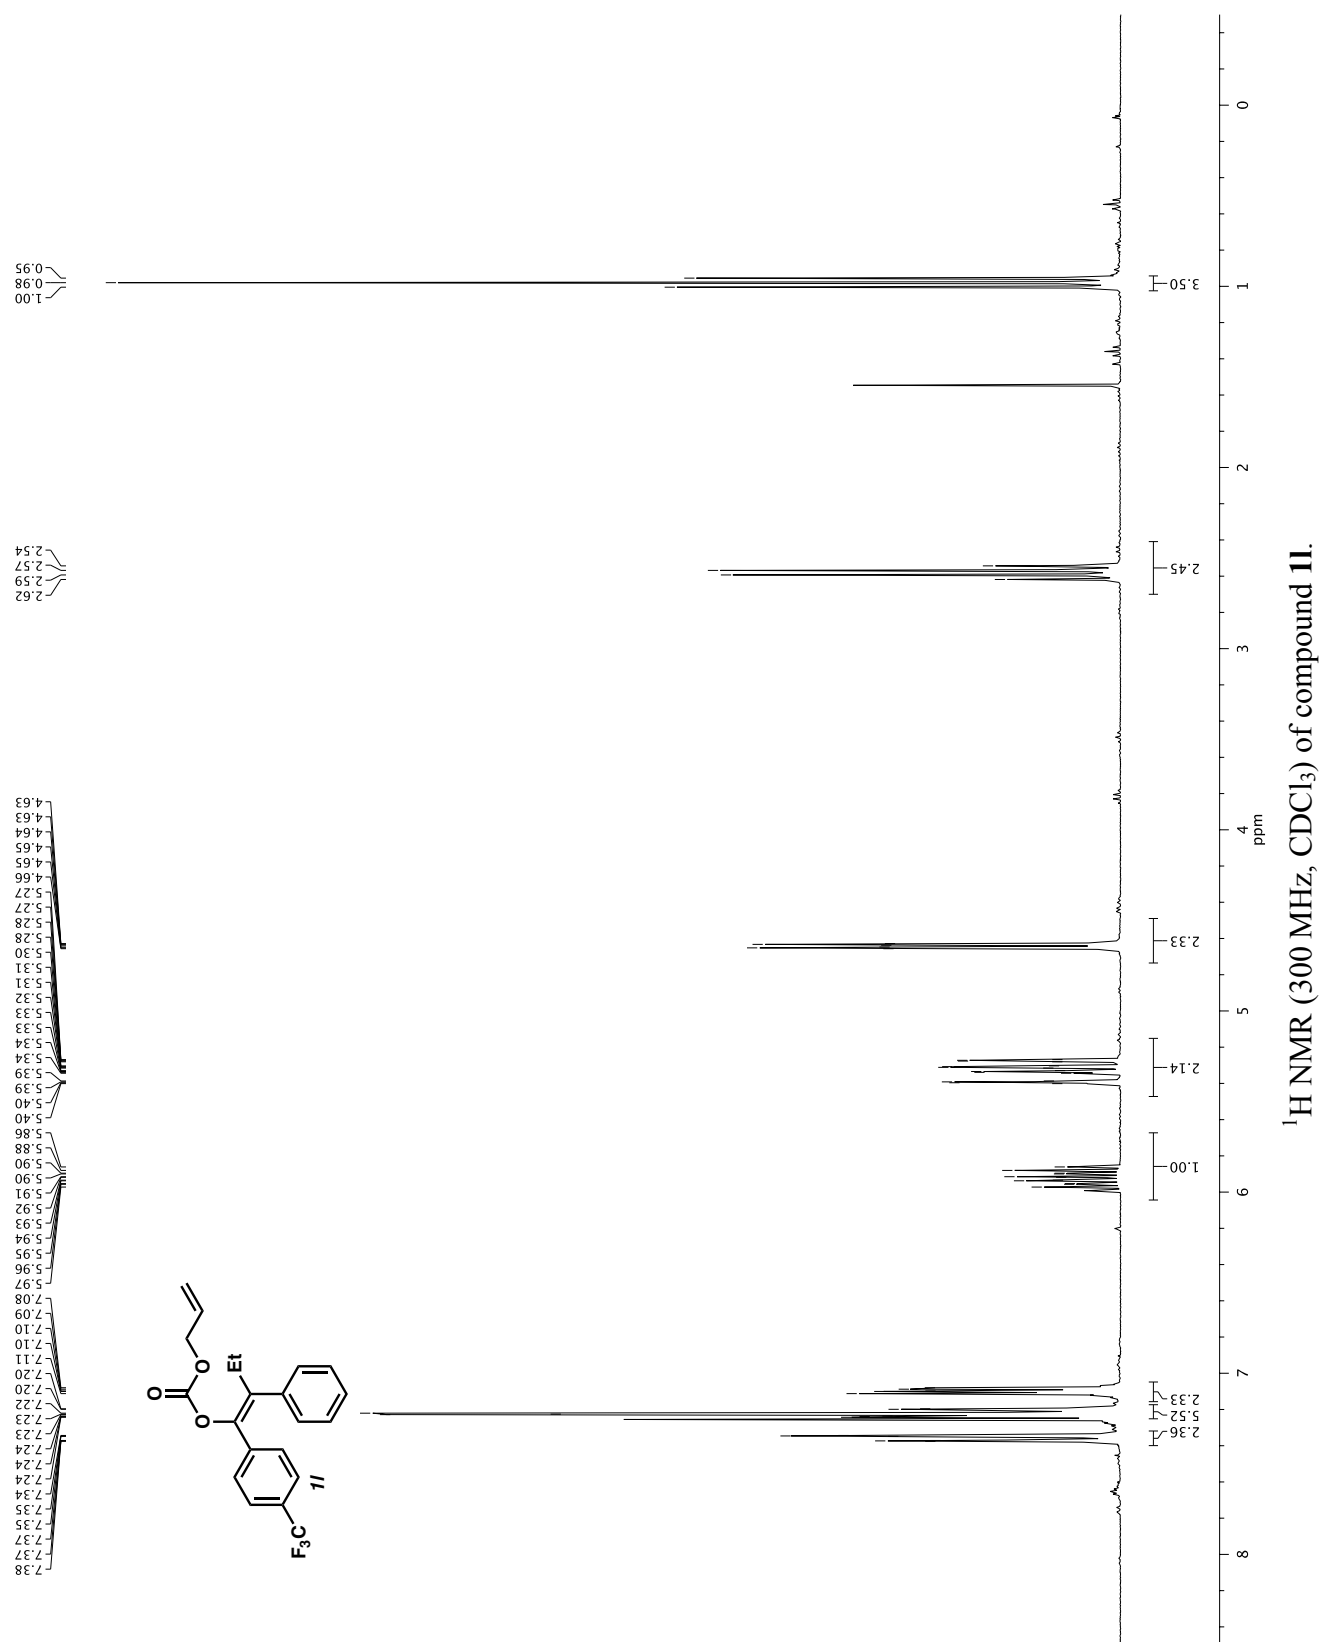



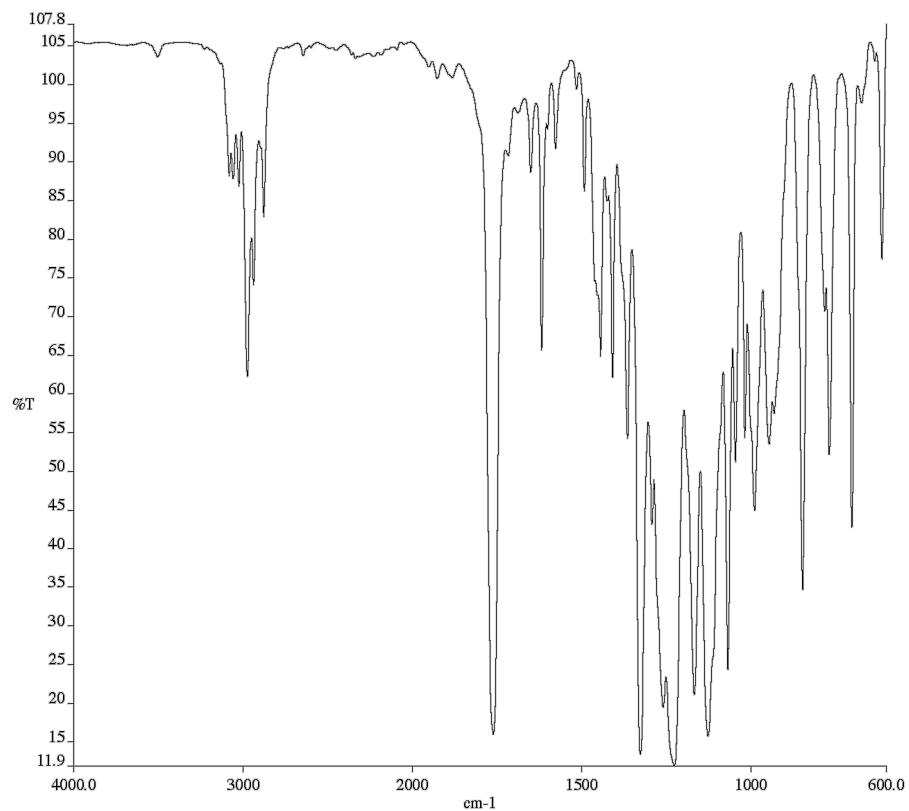Infrared spectrum (Thin Film, NaCl) of compound **11**.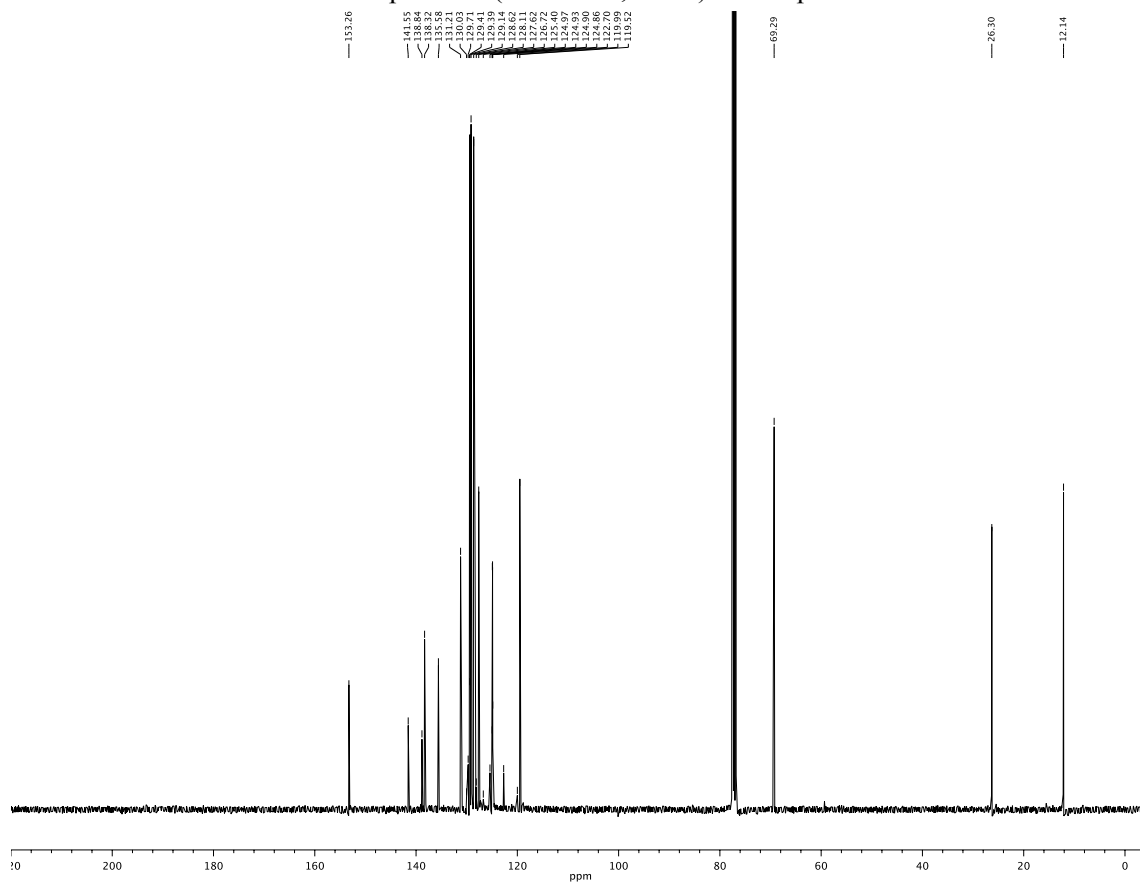<sup>13</sup>C NMR (100 MHz, CDCl<sub>3</sub>) of compound **11**.

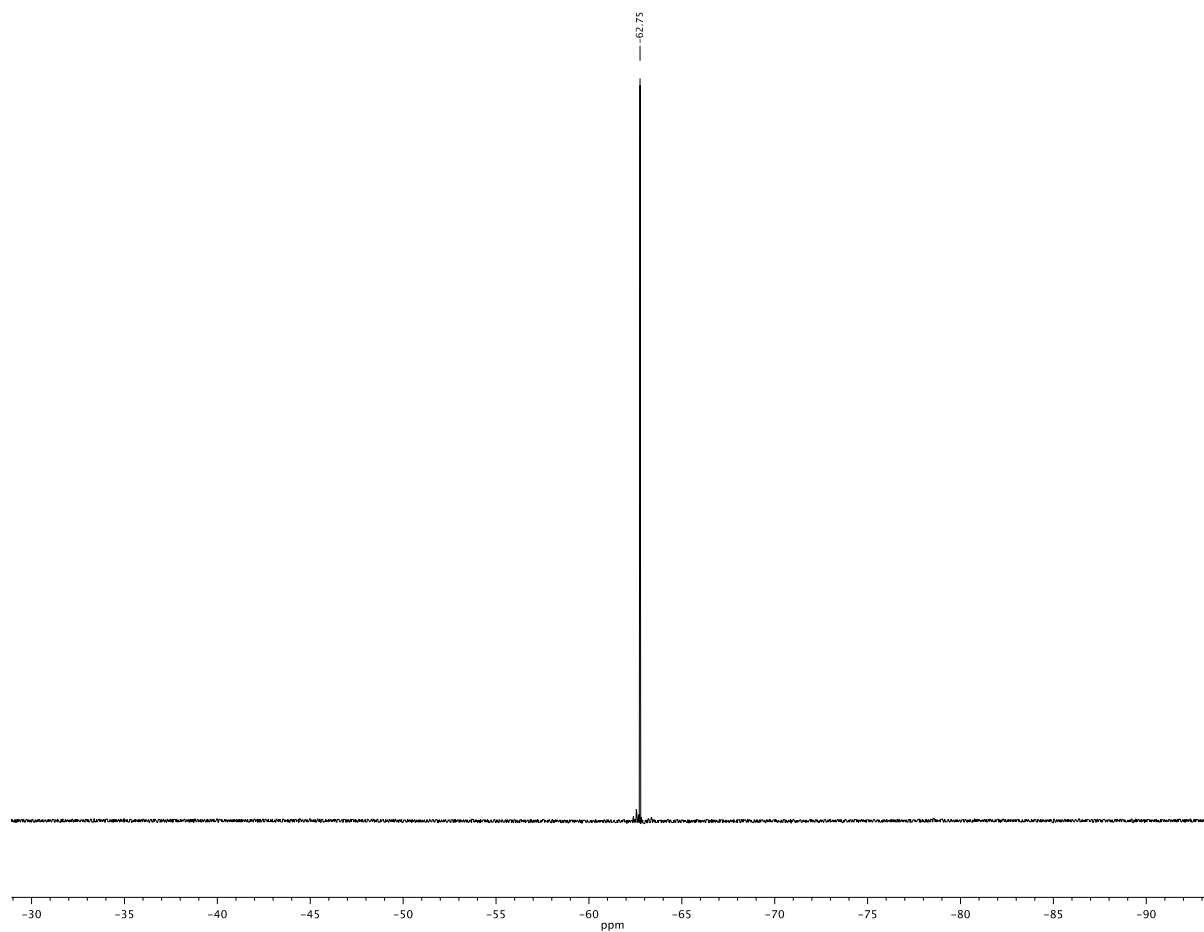

$^{19}\text{F}$  NMR (100 MHz,  $\text{CDCl}_3$ ) of compound **11**.

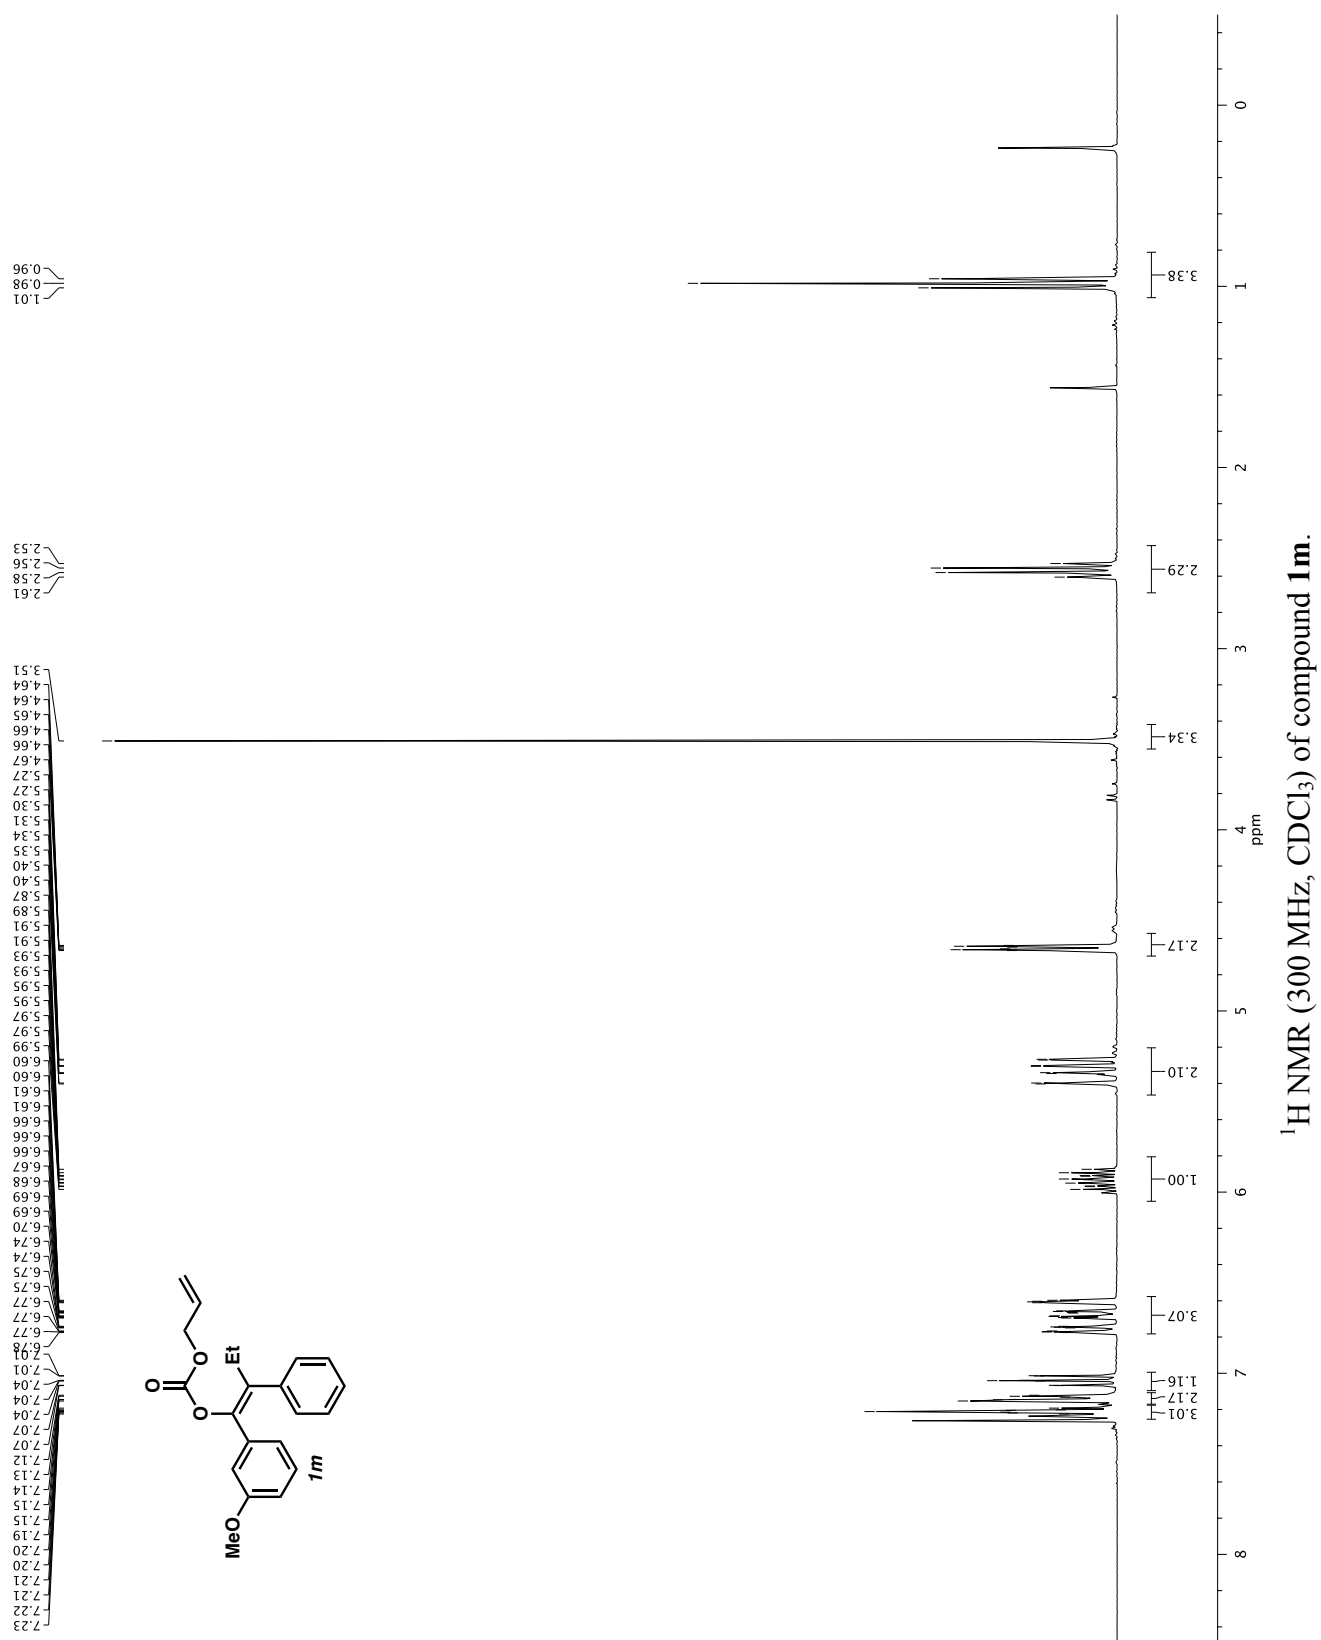

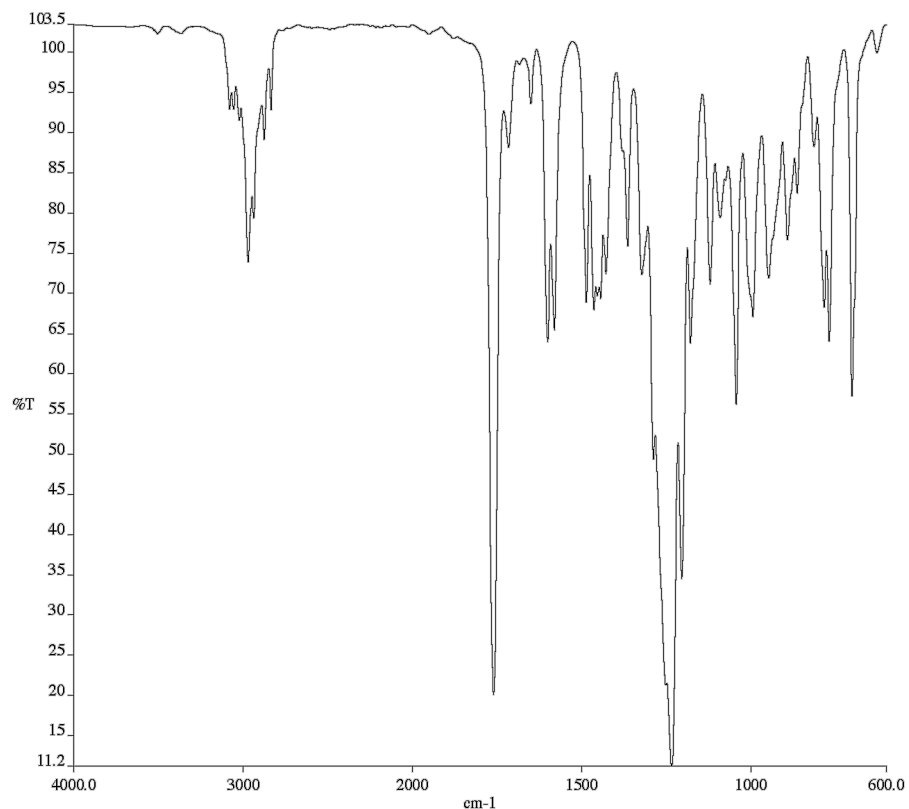Infrared spectrum (Thin Film, NaCl) of compound **1m**.

158.88  
153.36  
142.78  
139.35  
138.14  
133.54  
132.96  
128.90  
127.18  
121.11  
119.24  
114.49  
113.96  
69.08  
55.05  
26.21  
12.24

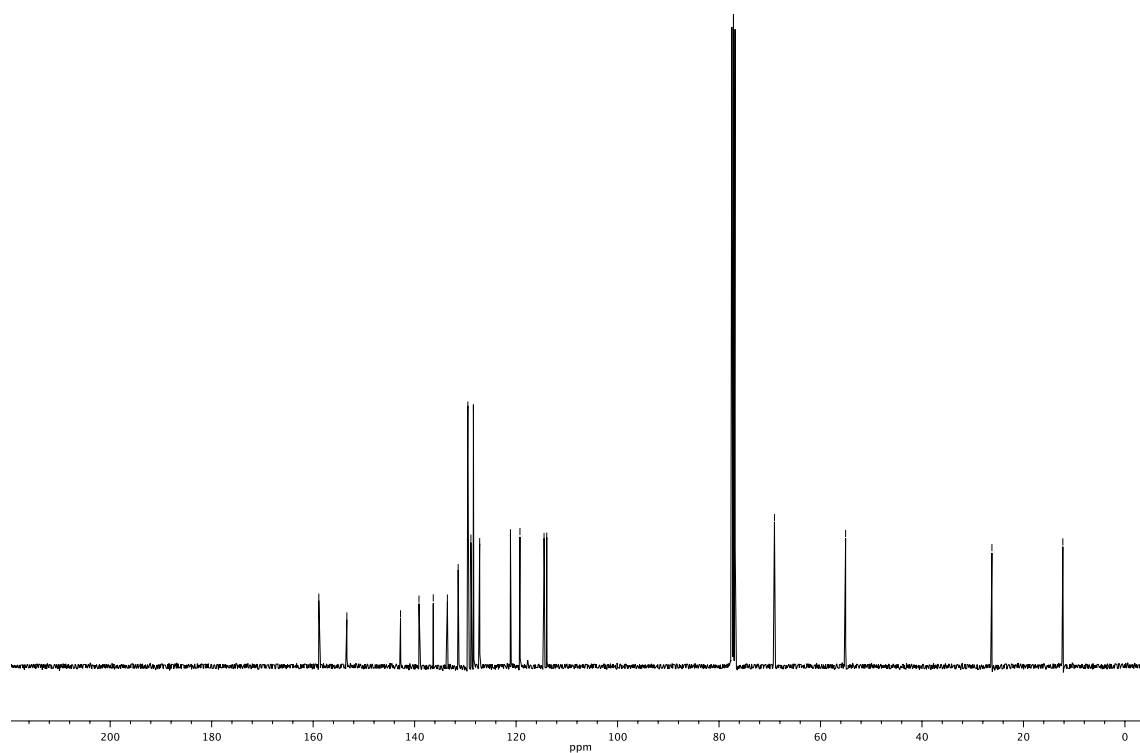<sup>13</sup>C NMR (100 MHz, CDCl<sub>3</sub>) of compound **1m**.

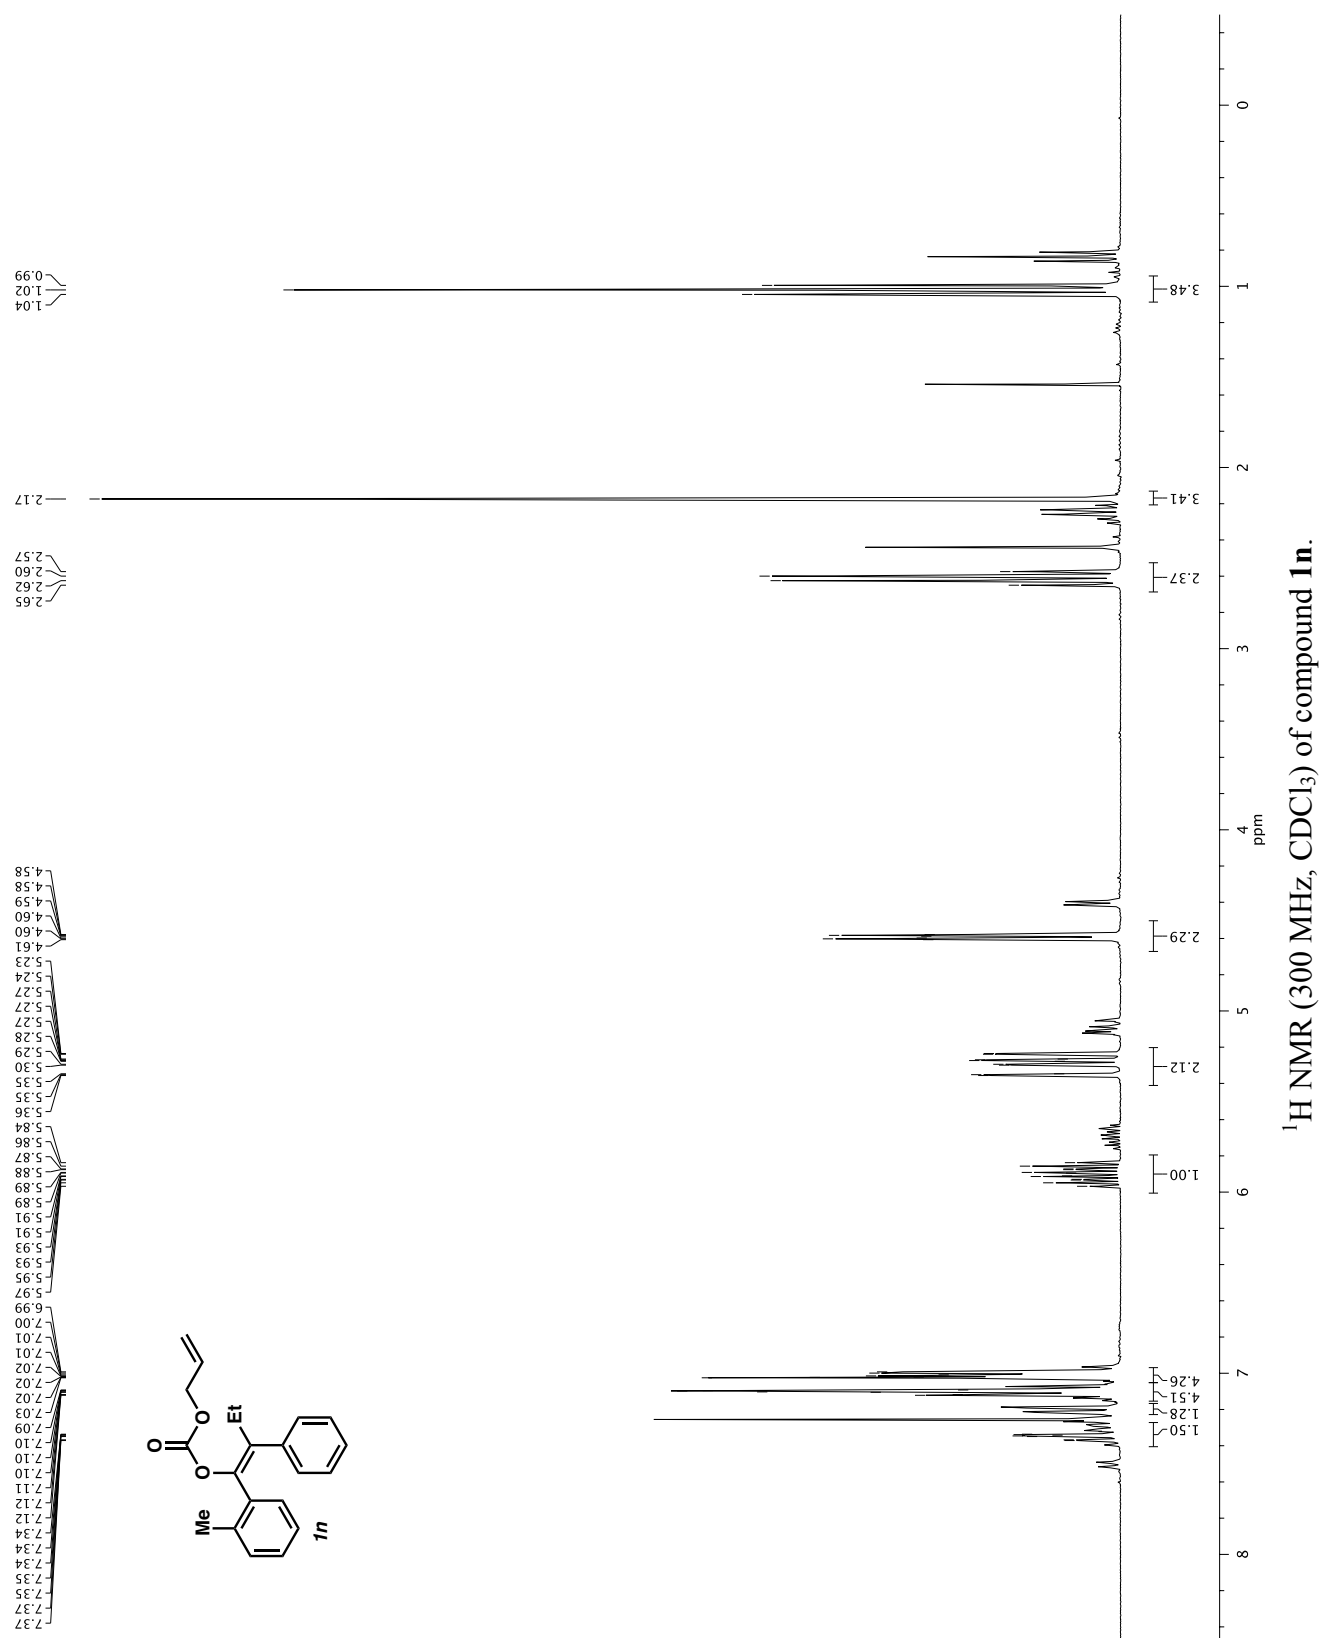

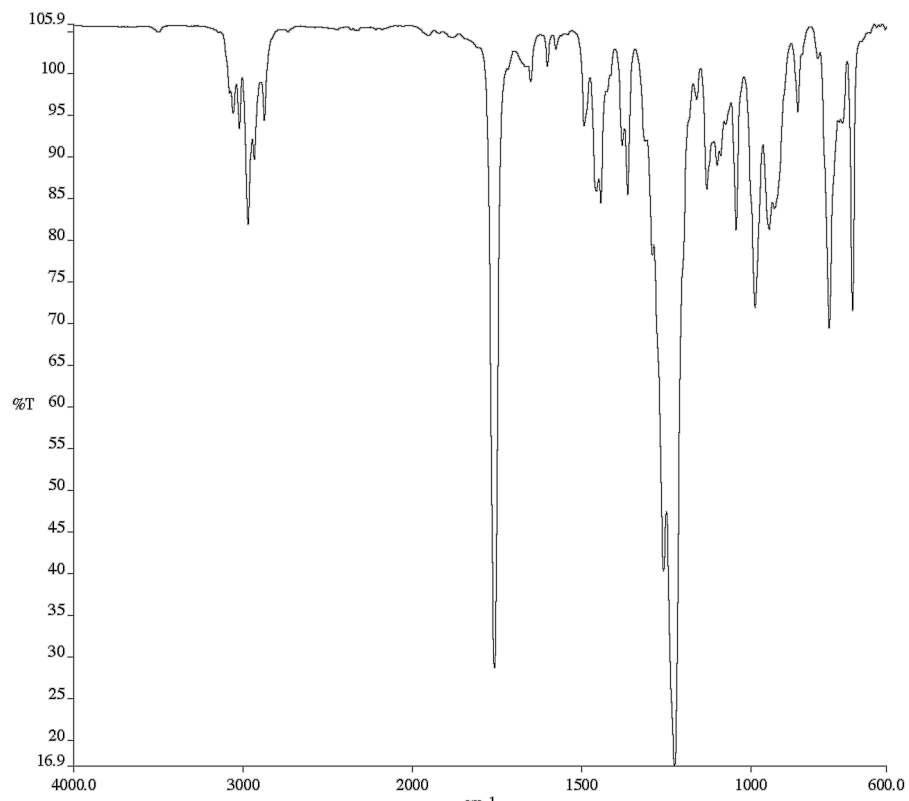Infrared spectrum (Thin Film, NaCl) of compound **1n**.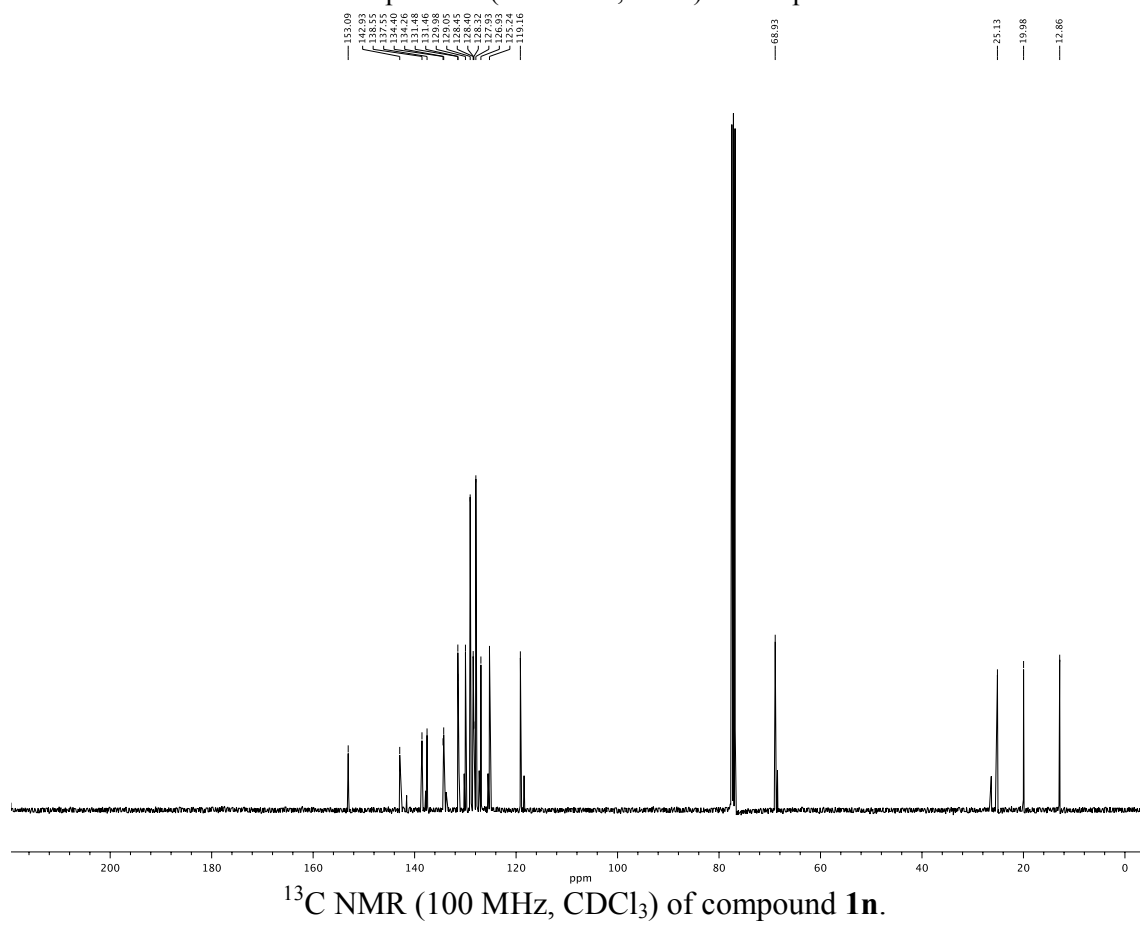<sup>13</sup>C NMR (100 MHz, CDCl<sub>3</sub>) of compound **1n**.

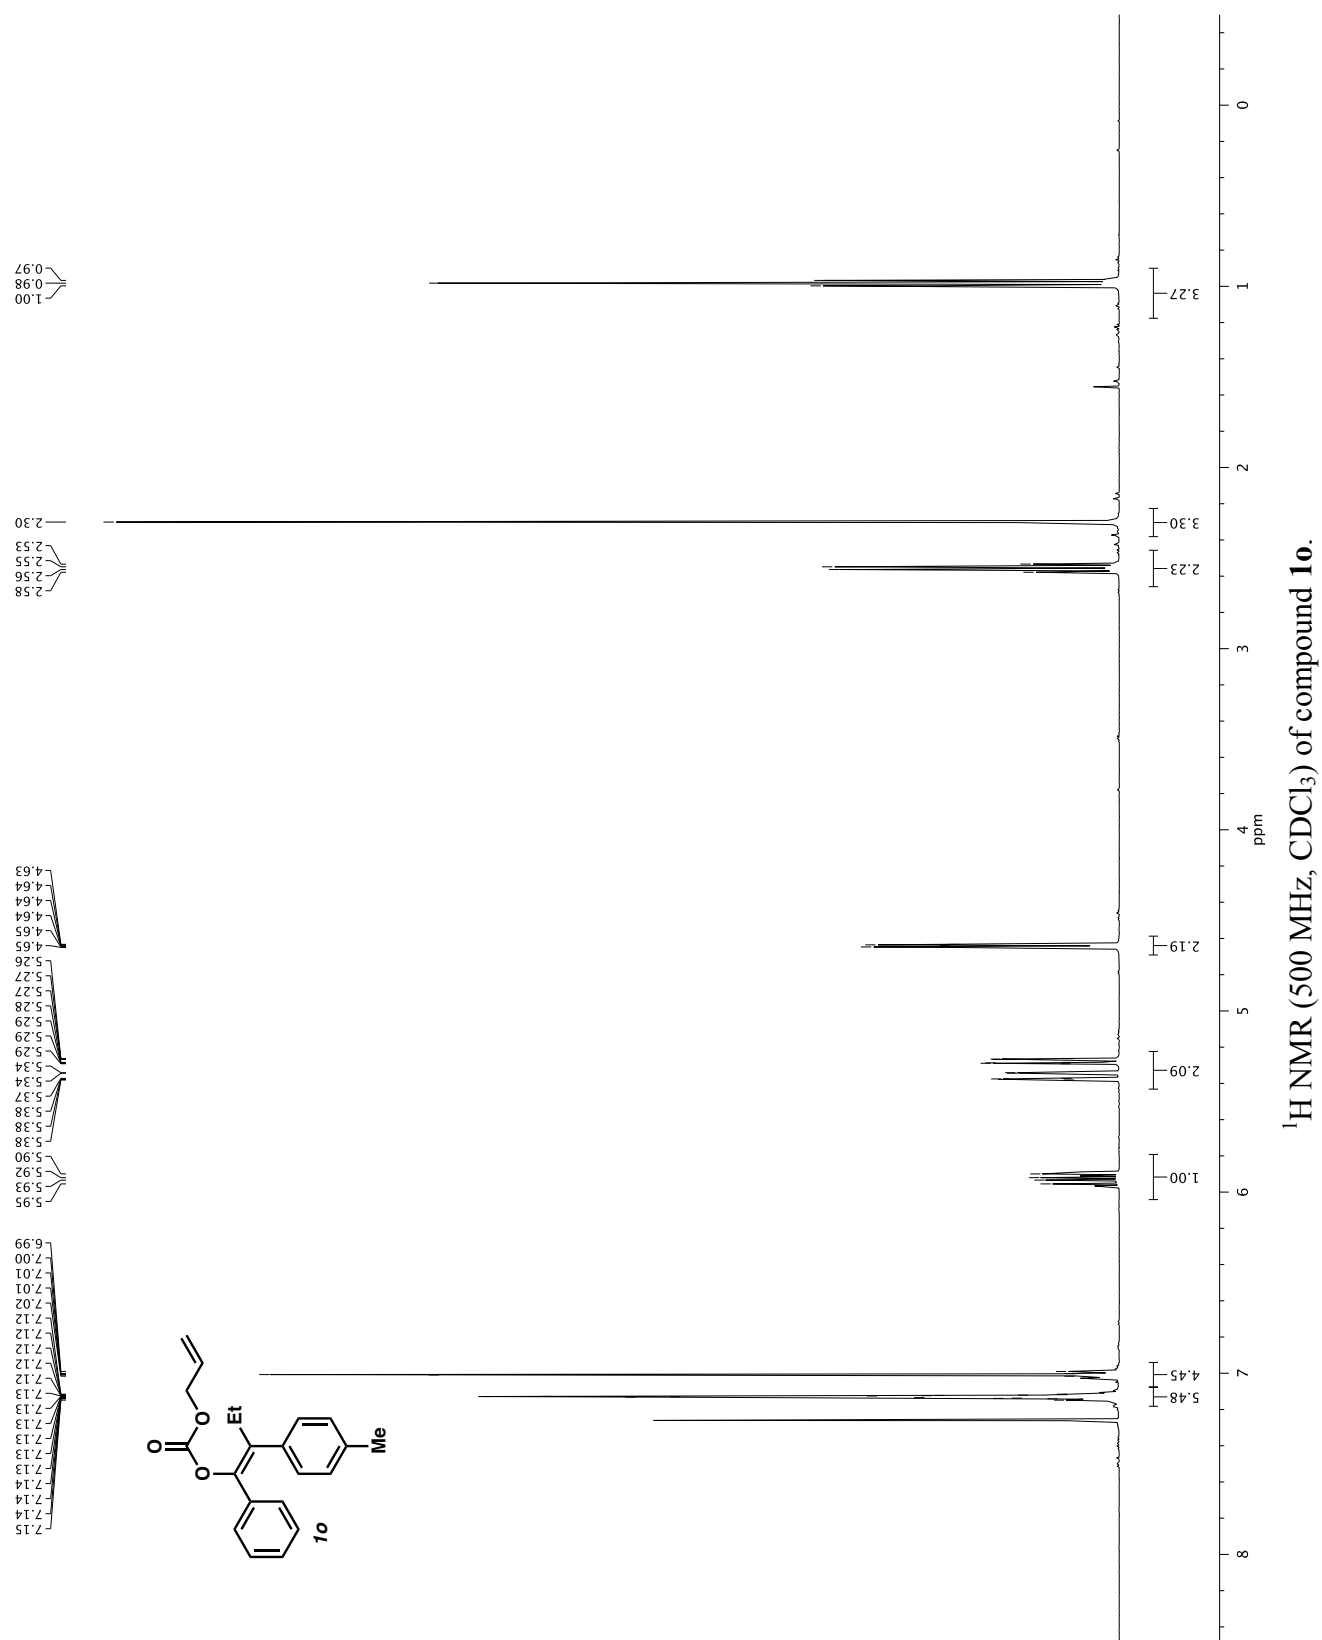

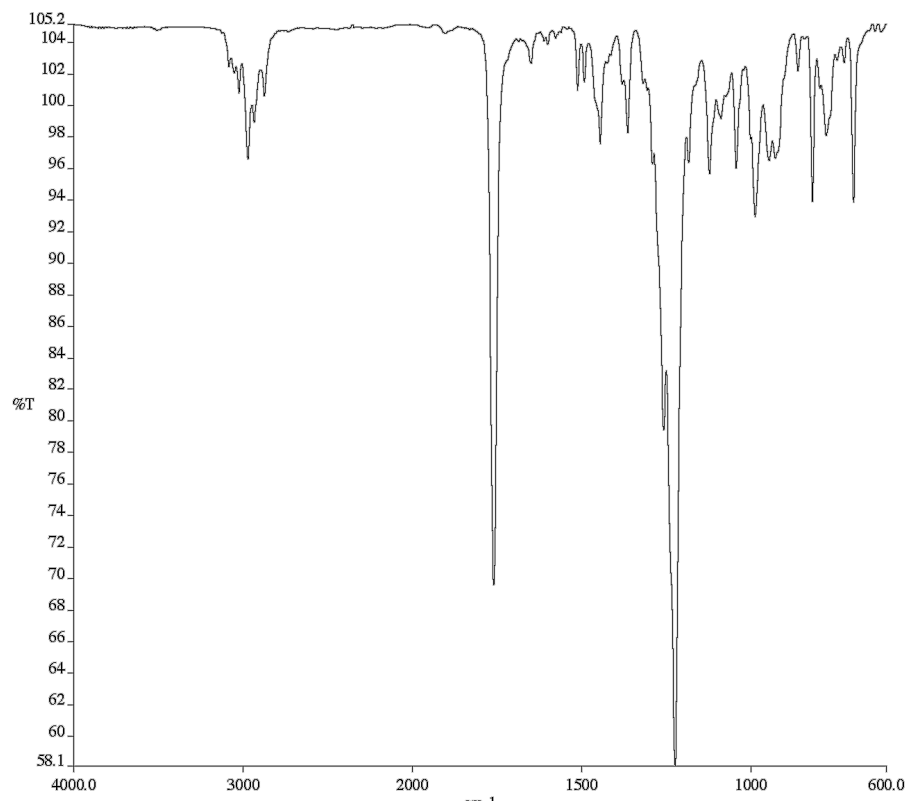Infrared spectrum (Thin Film, NaCl) of compound **1o**.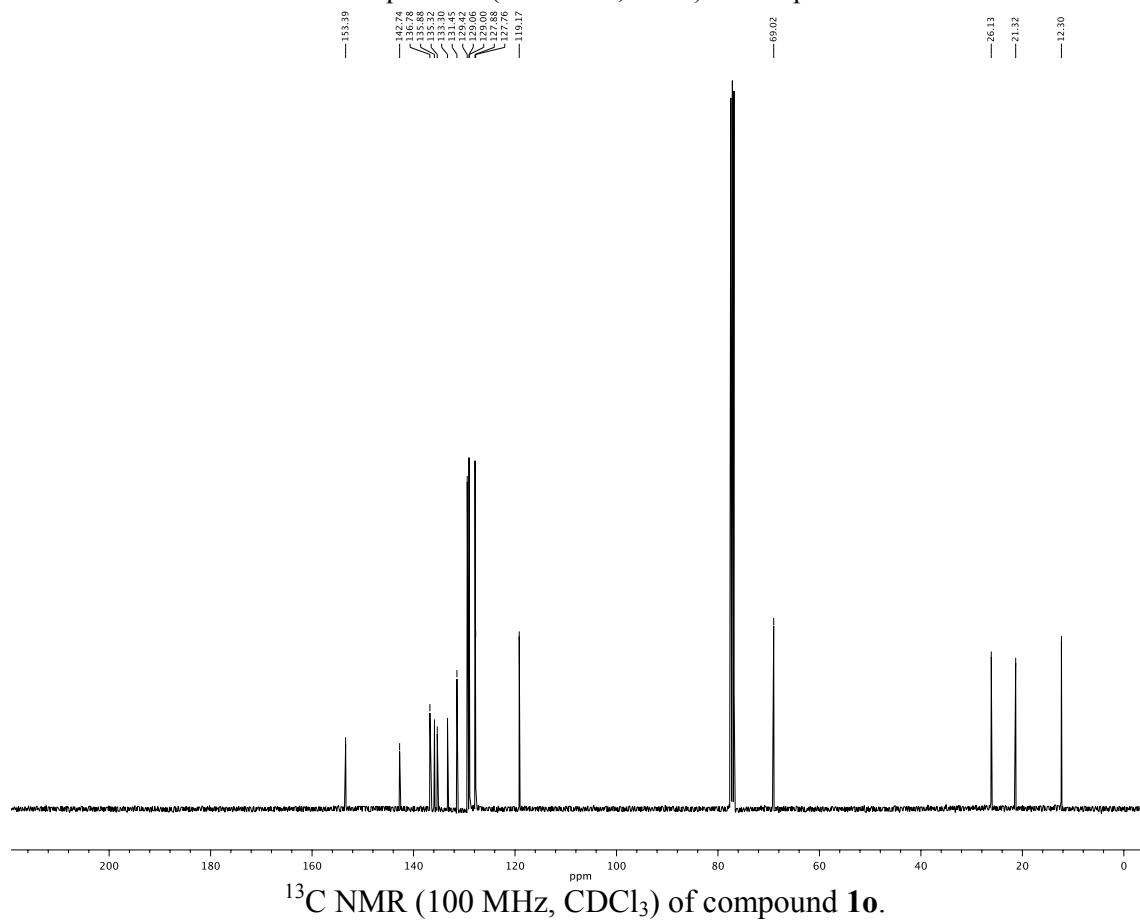





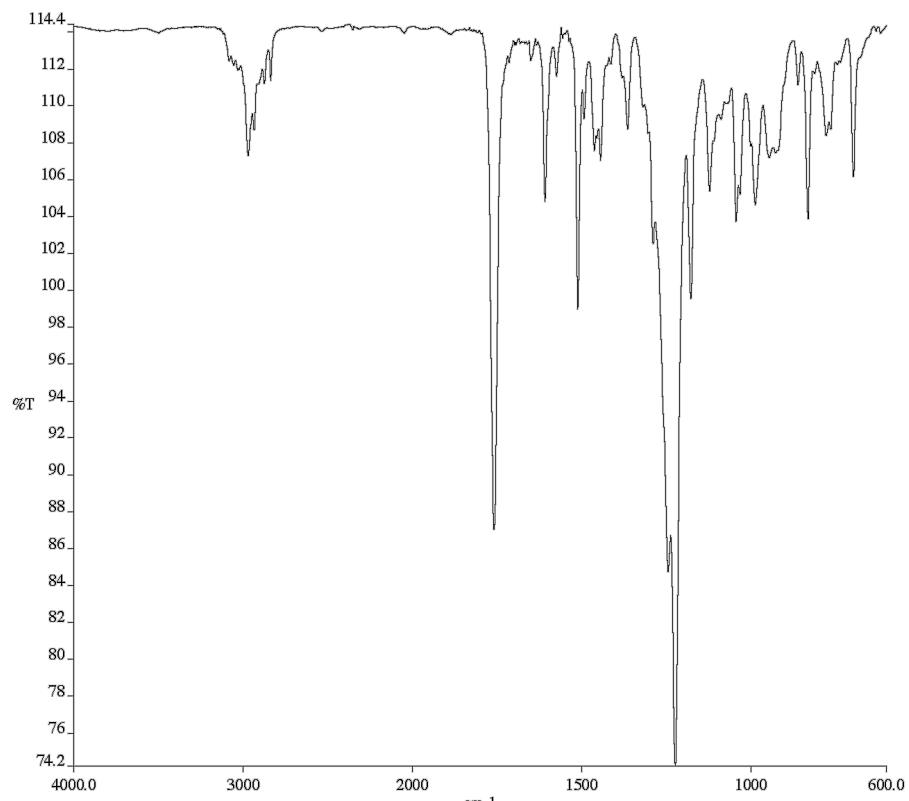Infrared spectrum (Thin Film, NaCl) of compound **1p**.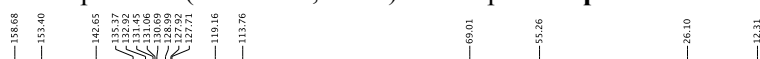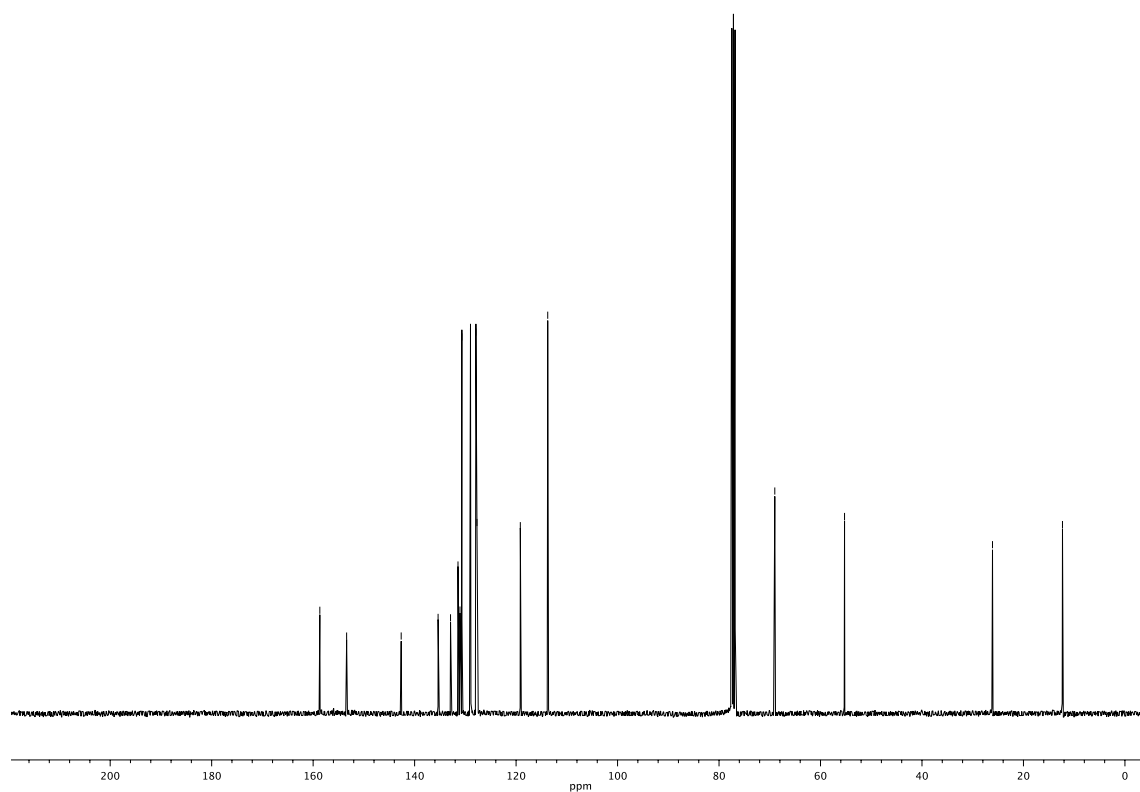<sup>13</sup>C NMR (100 MHz, CDCl<sub>3</sub>) of compound **1p**.

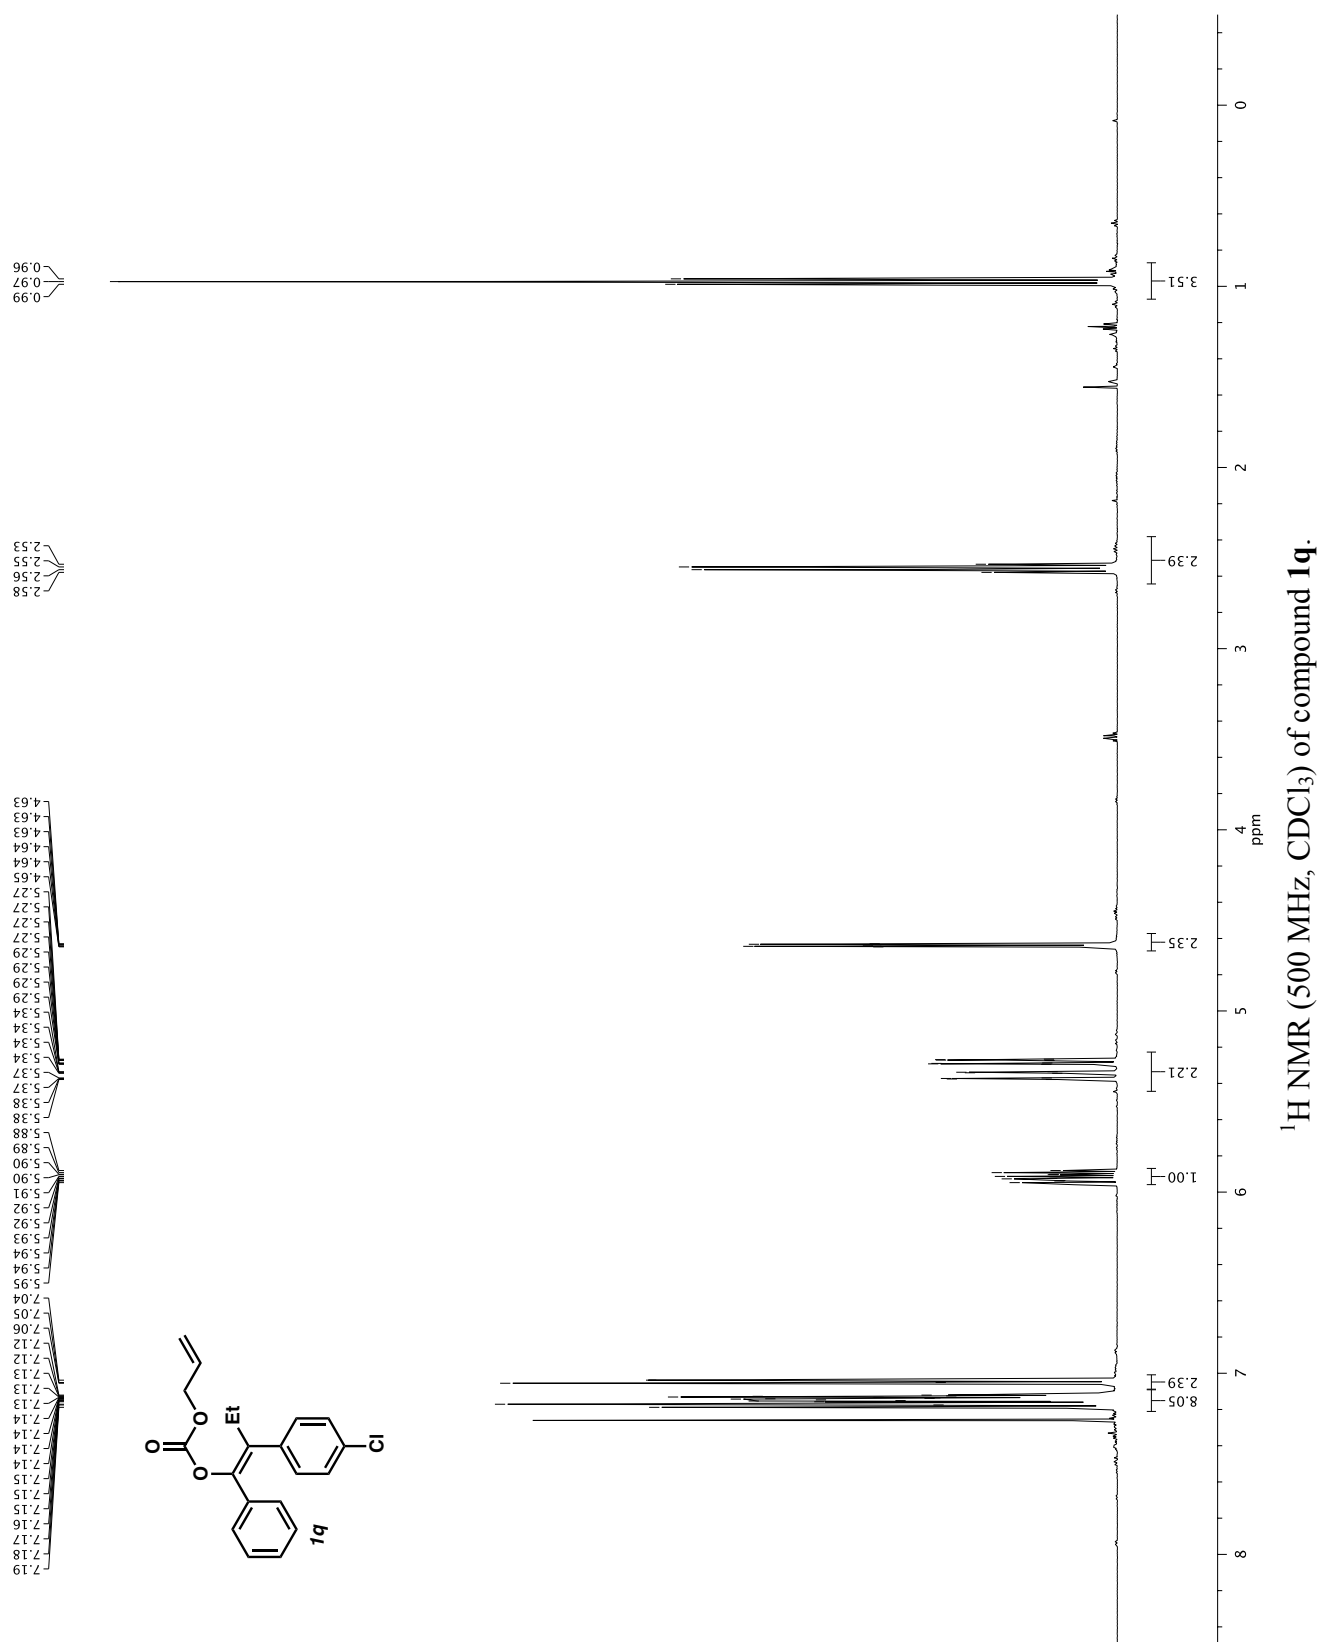

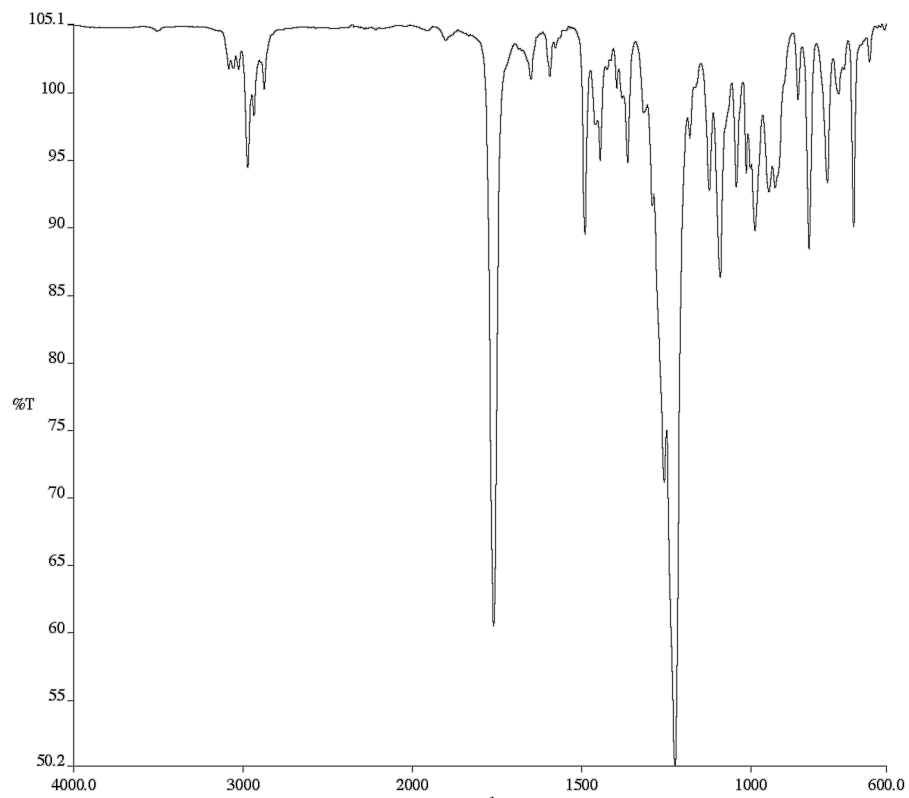Infrared spectrum (Thin Film, NaCl) of compound **1q**.

1532.21, 1434.46, 1377.45, 1359.96, 1327.22, 1309.53, 1290.07, 1288.74, 1288.07, 1189.30, 699.12, 259.1, 12.24

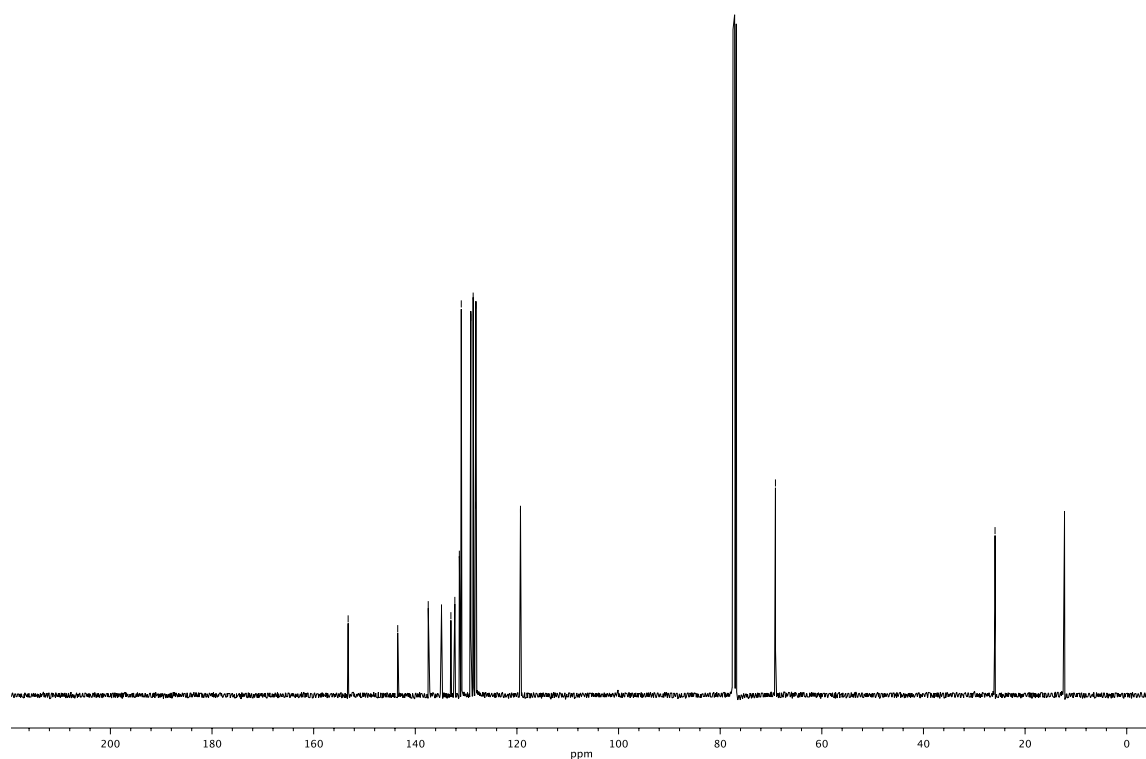<sup>13</sup>C NMR (100 MHz, CDCl<sub>3</sub>) of compound **1q**.

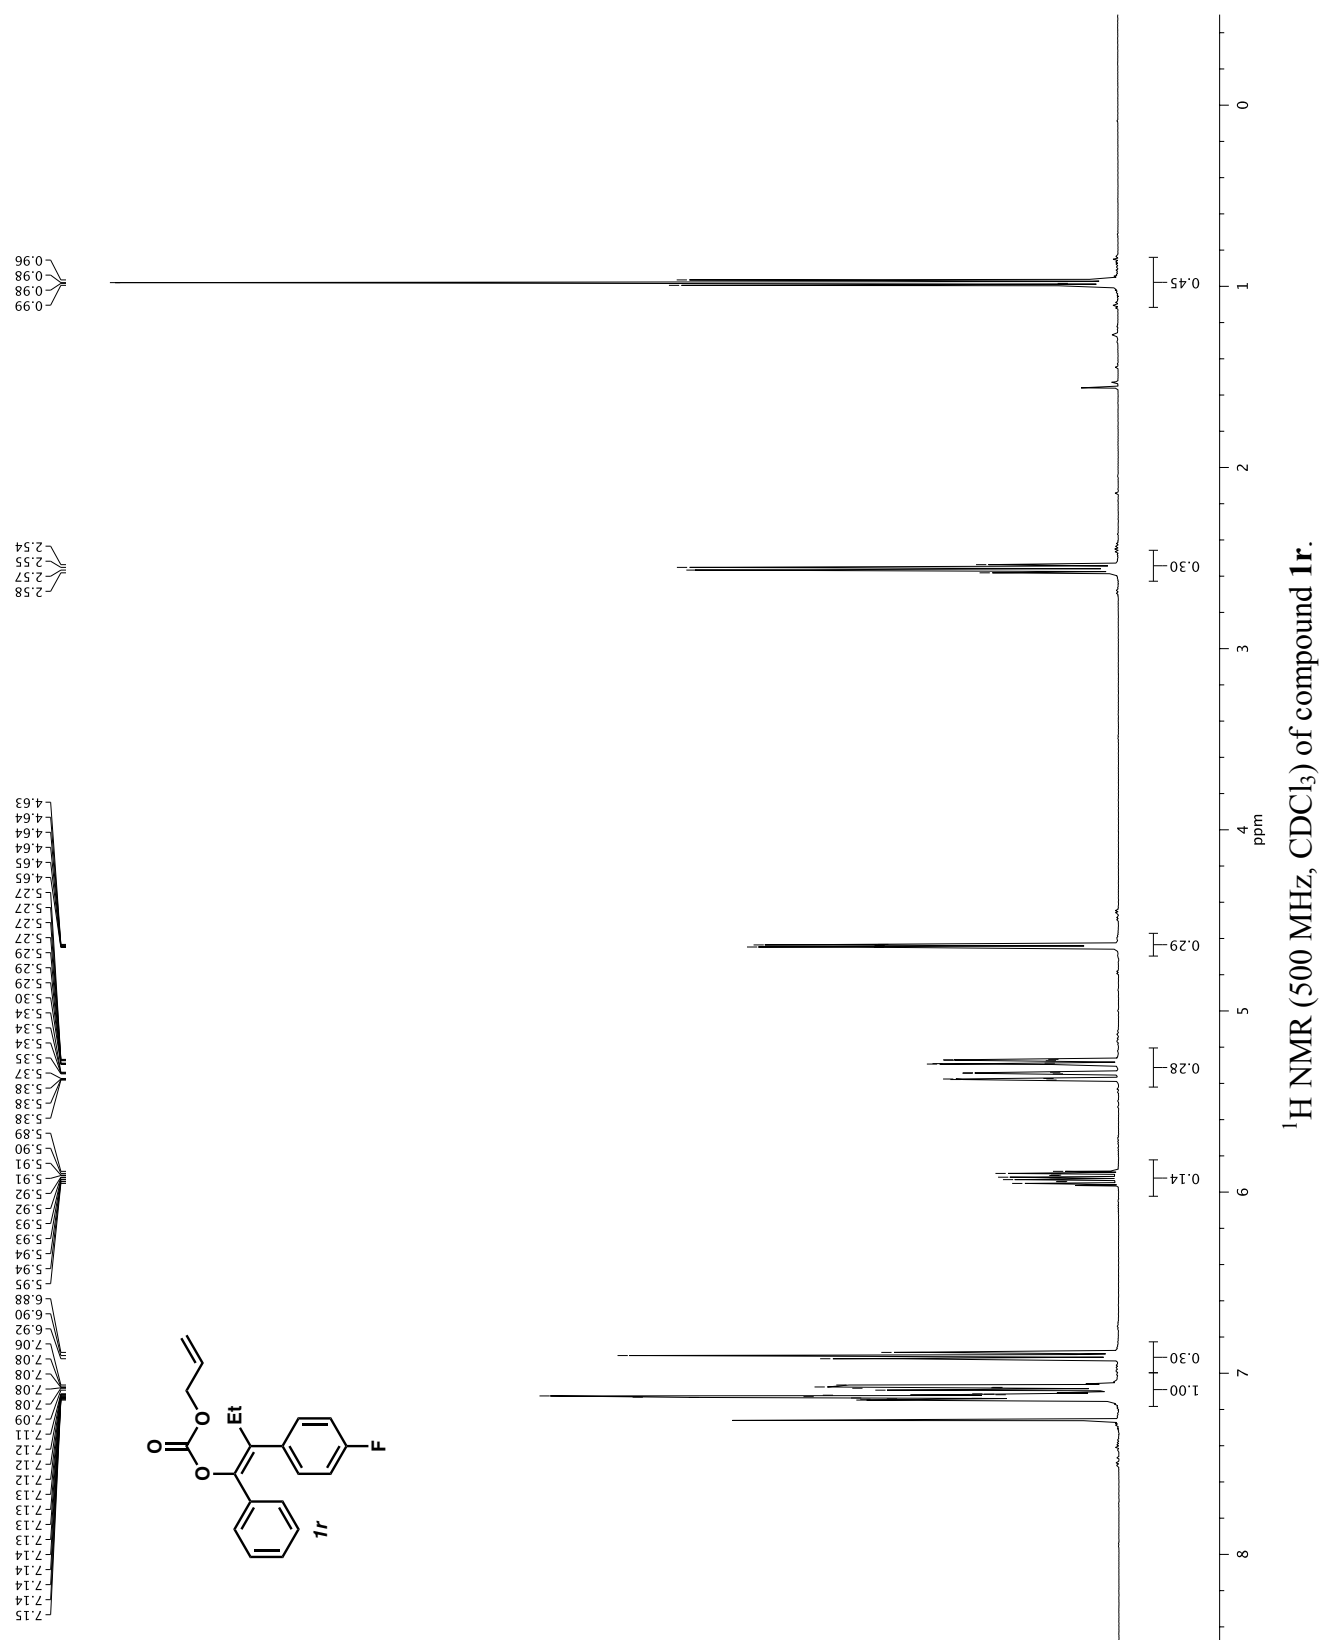

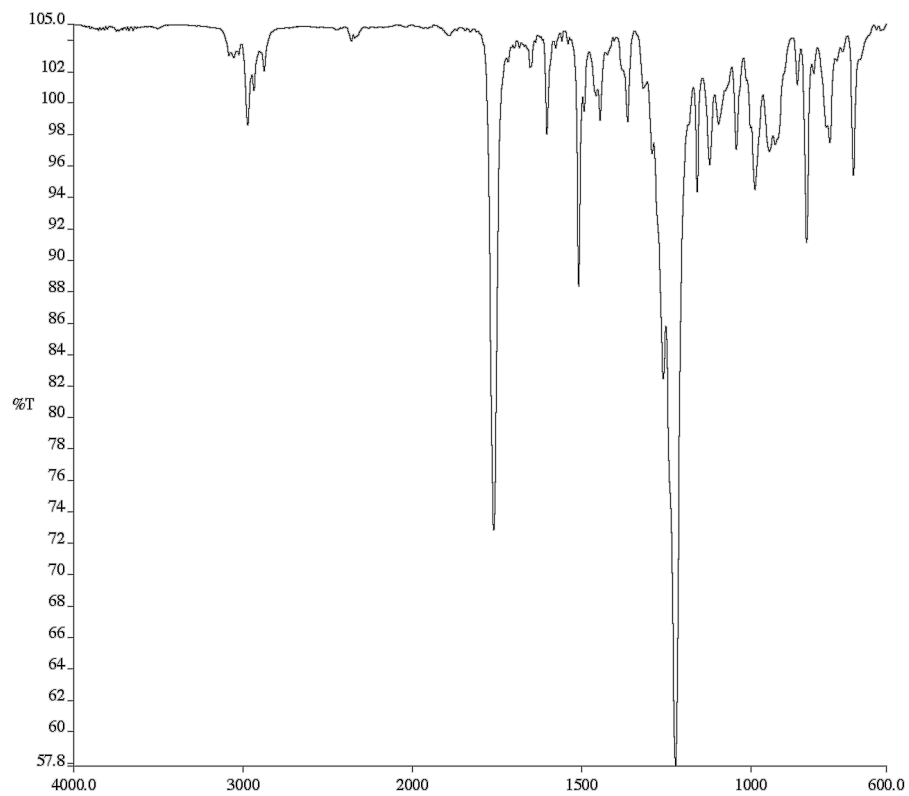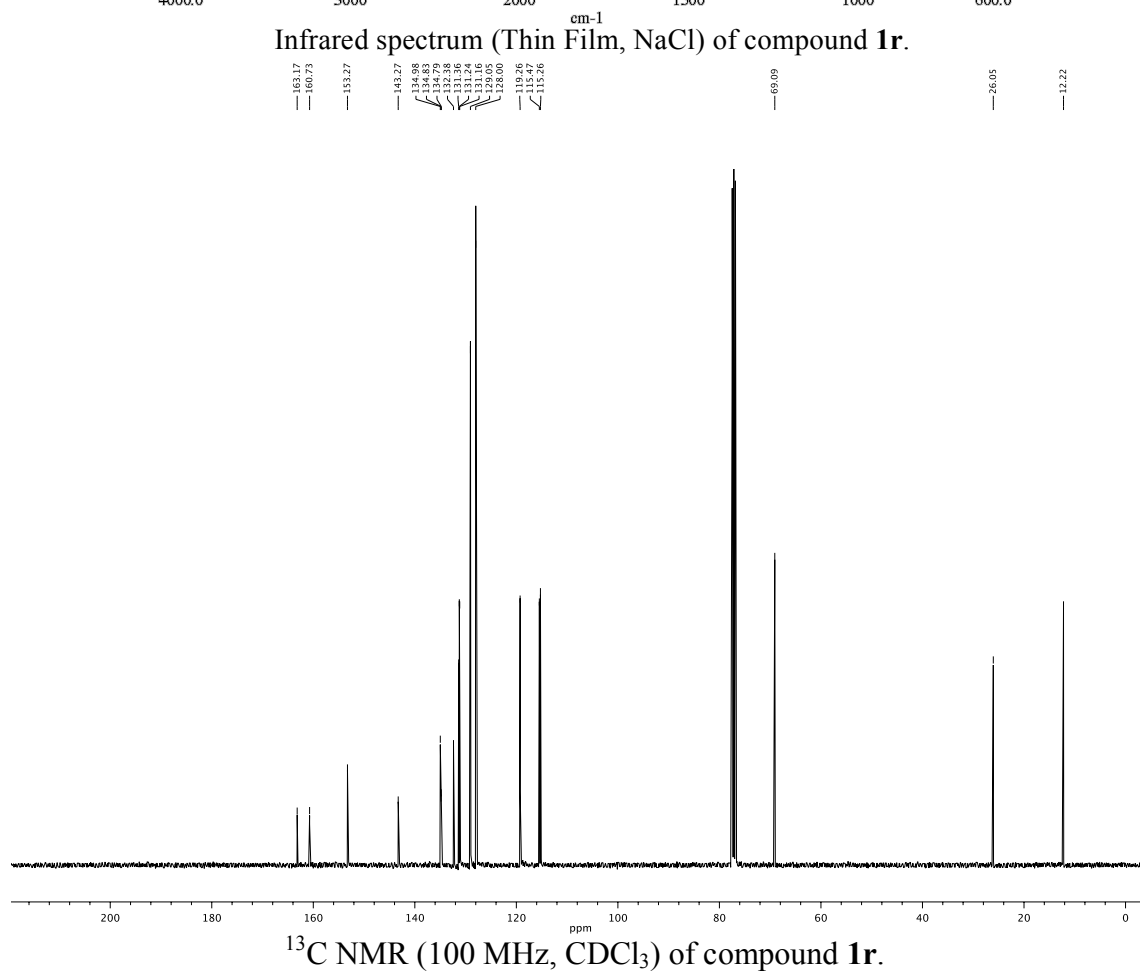

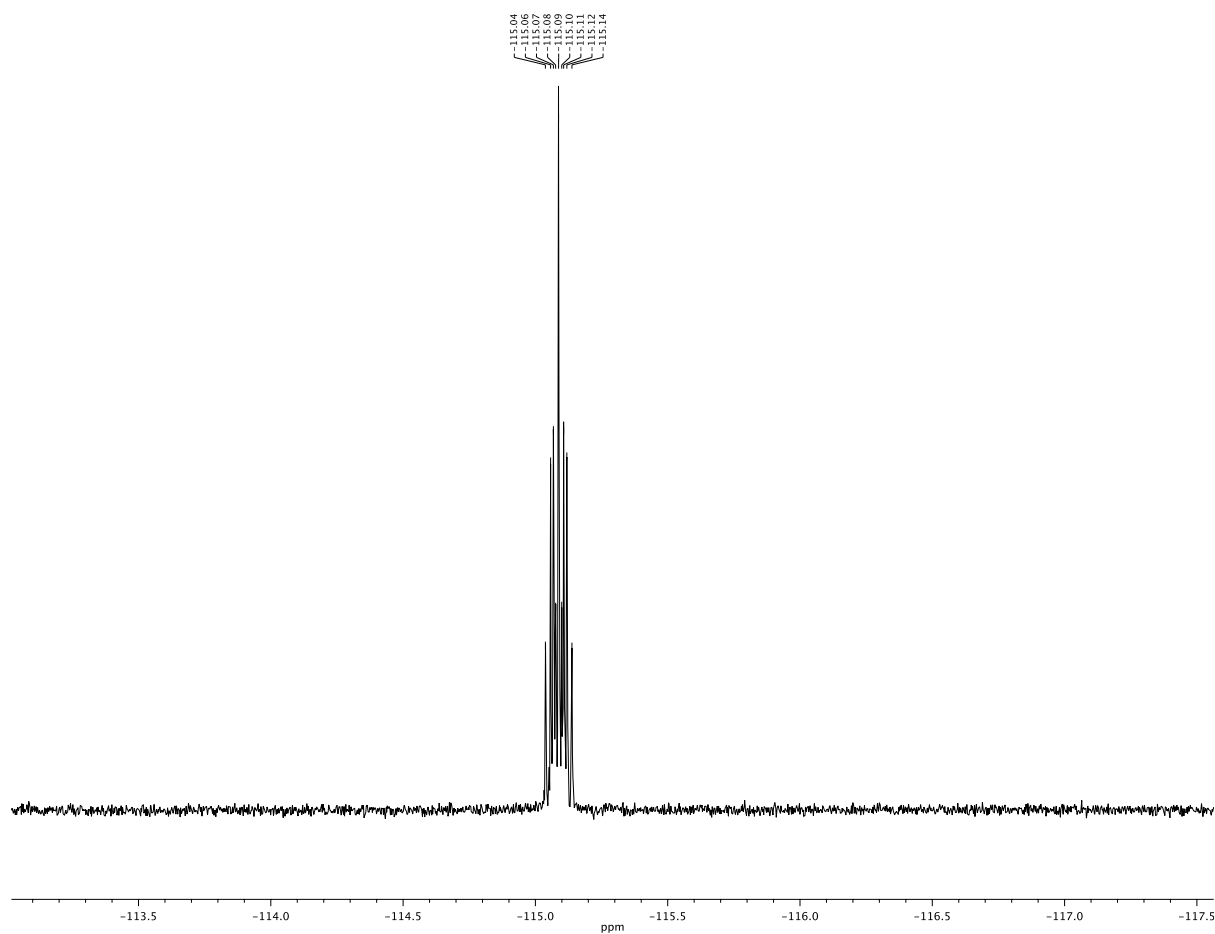

$^{19}\text{F}$  NMR (282 MHz,  $\text{CDCl}_3$ ) of compound **1r**.

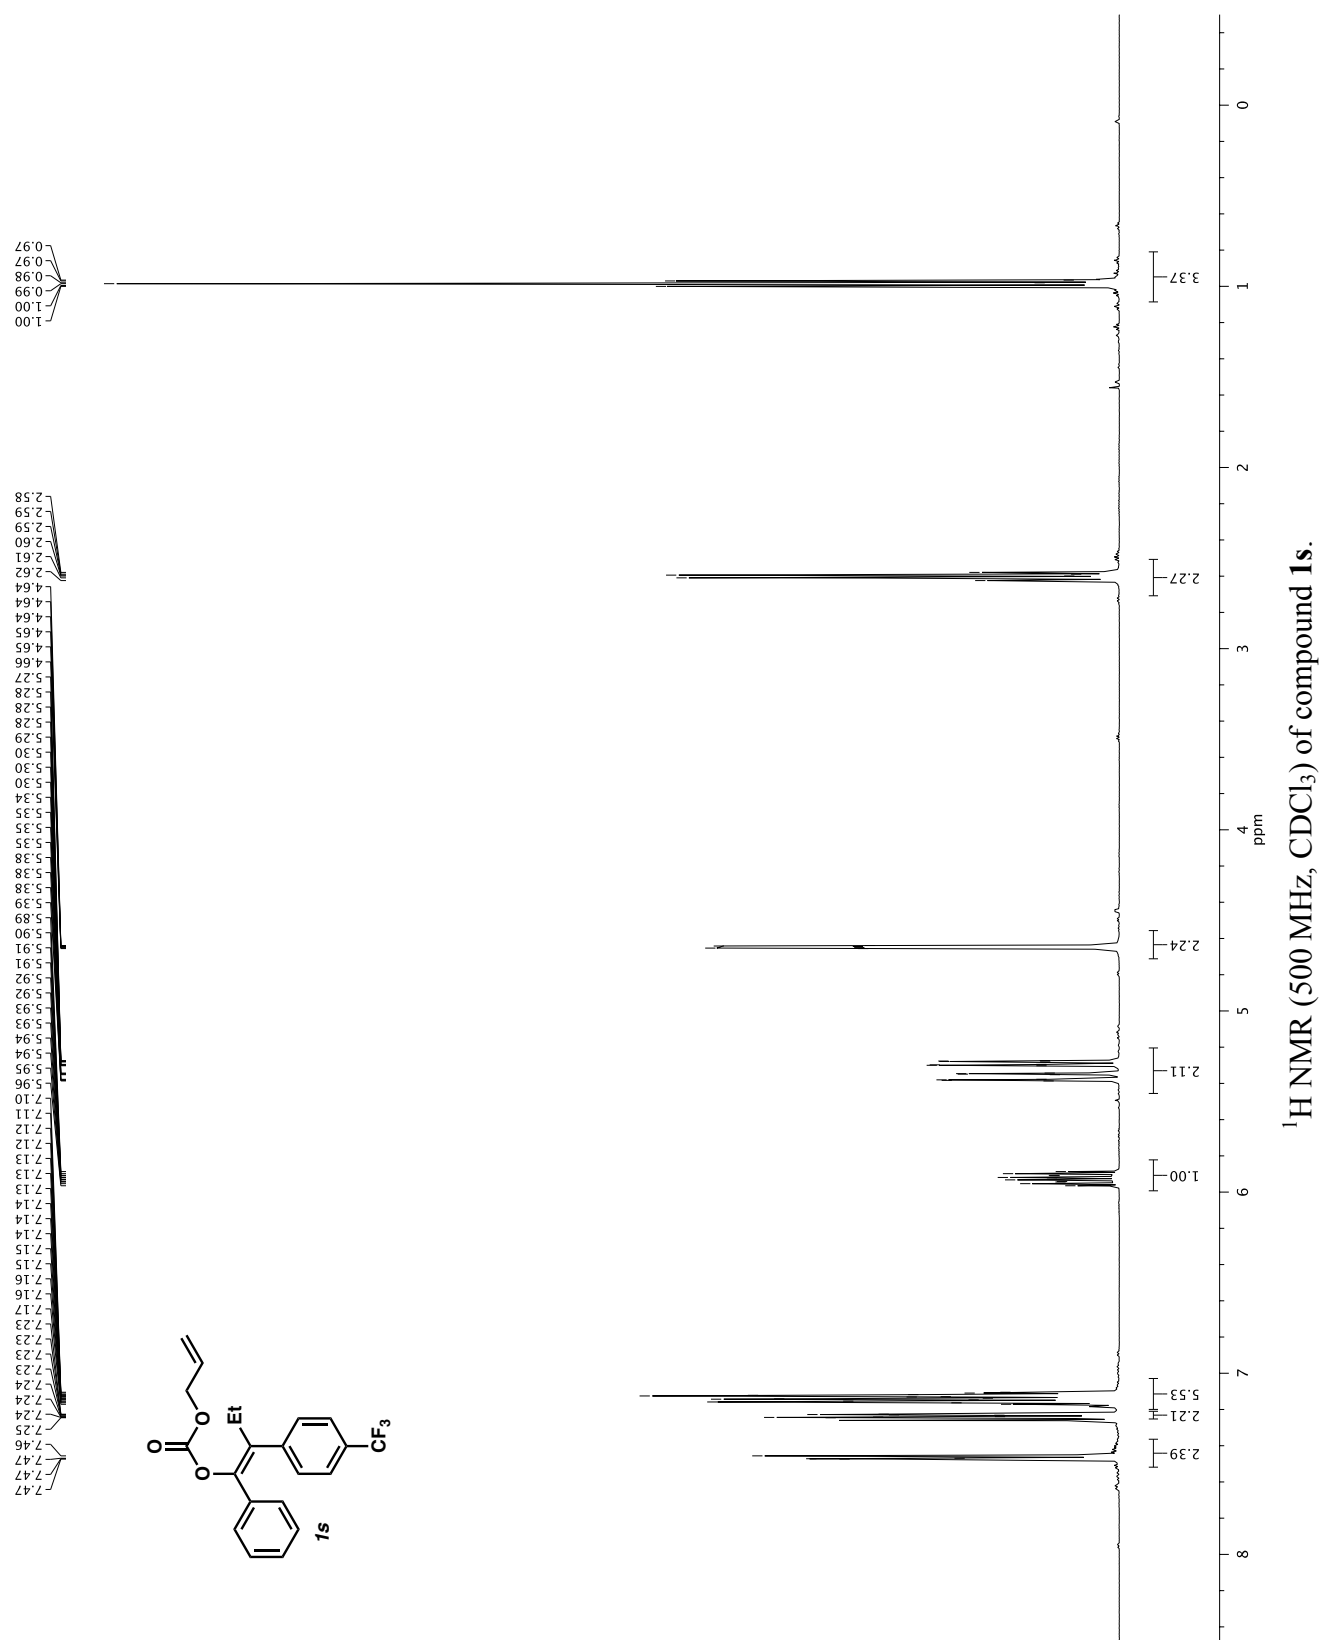



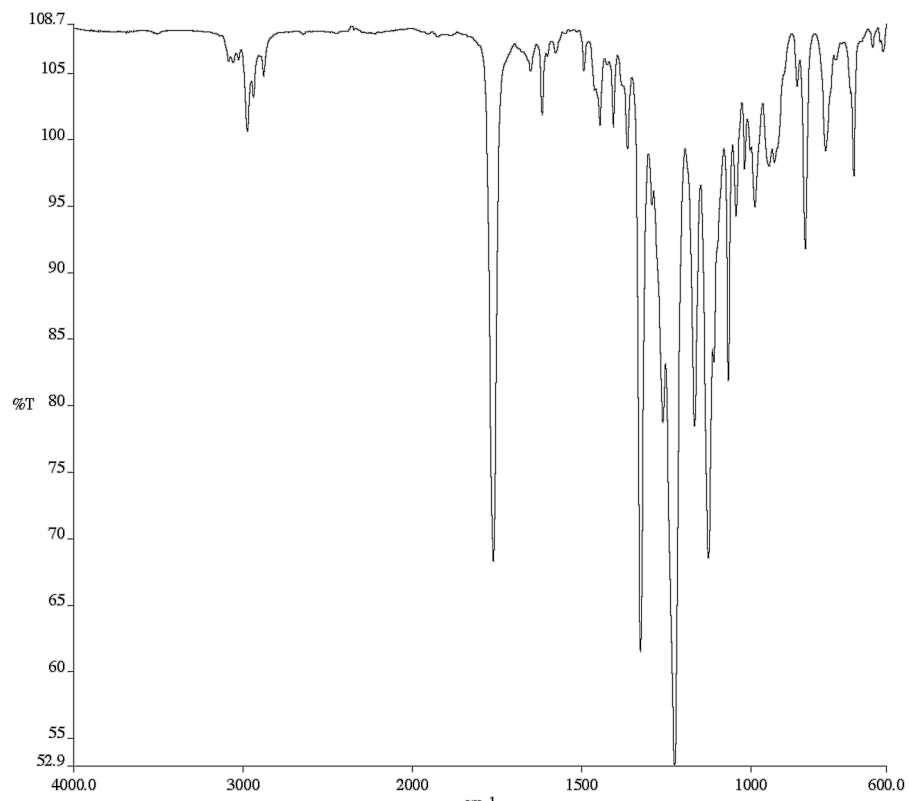Infrared spectrum (Thin Film, NaCl) of compound **1s**.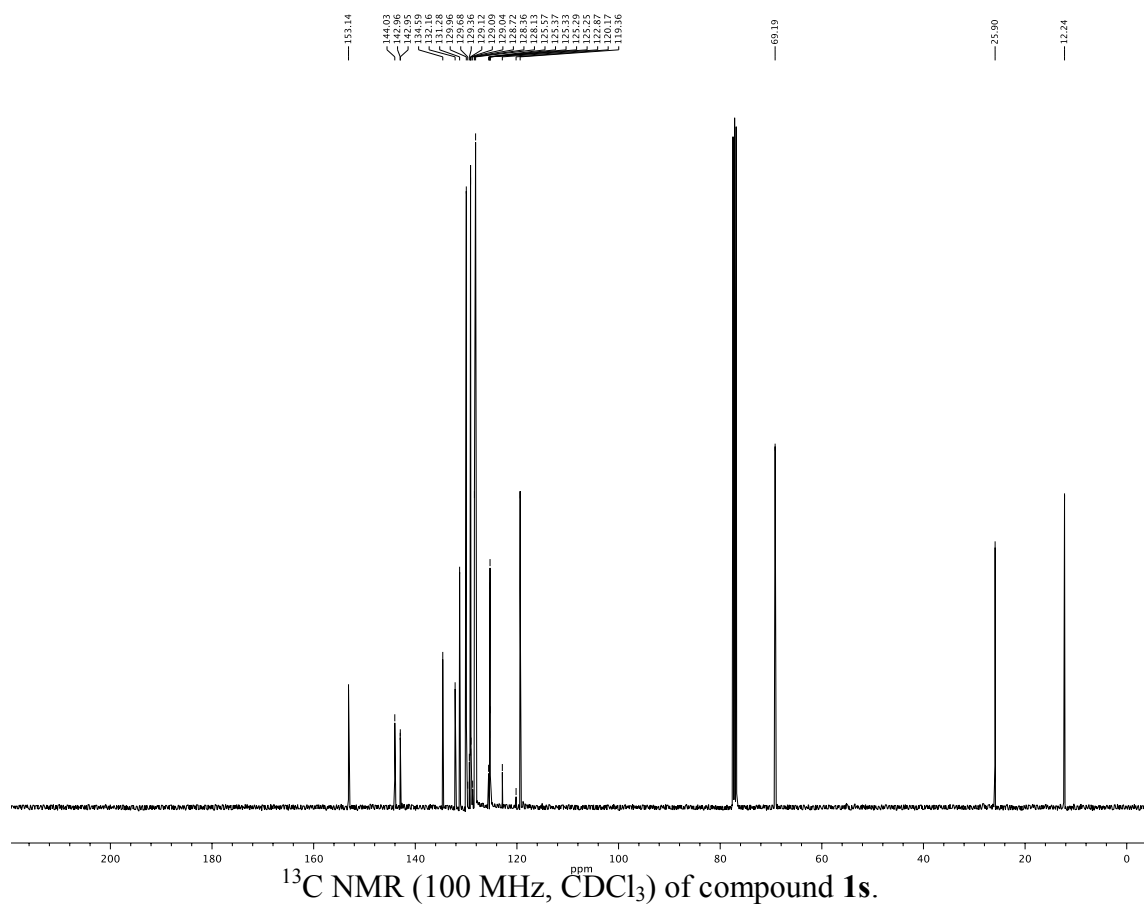<sup>13</sup>C NMR (100 MHz, CDCl<sub>3</sub>) of compound **1s**.

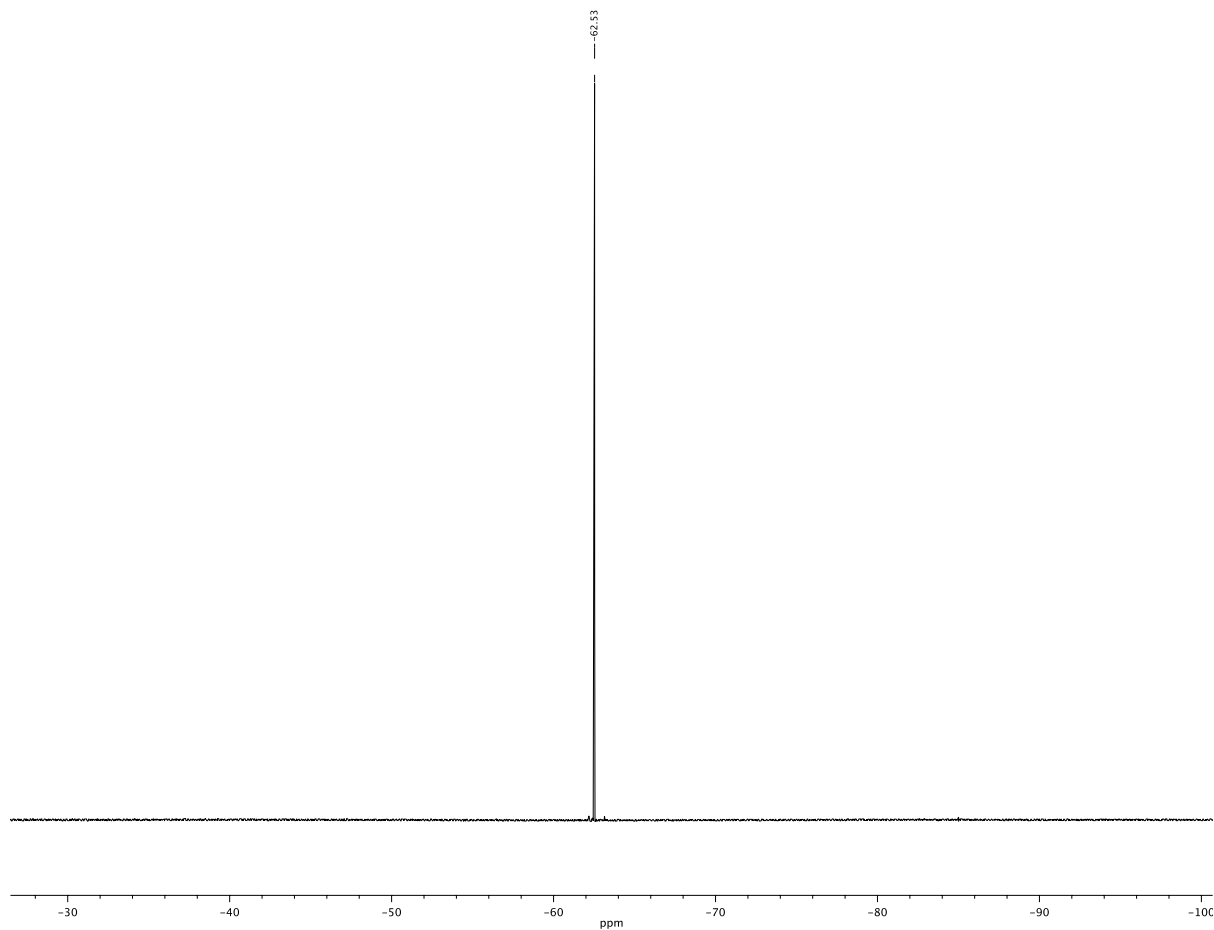

$^{19}\text{F}$  NMR (282 MHz,  $\text{CDCl}_3$ ) of compound **1s**.

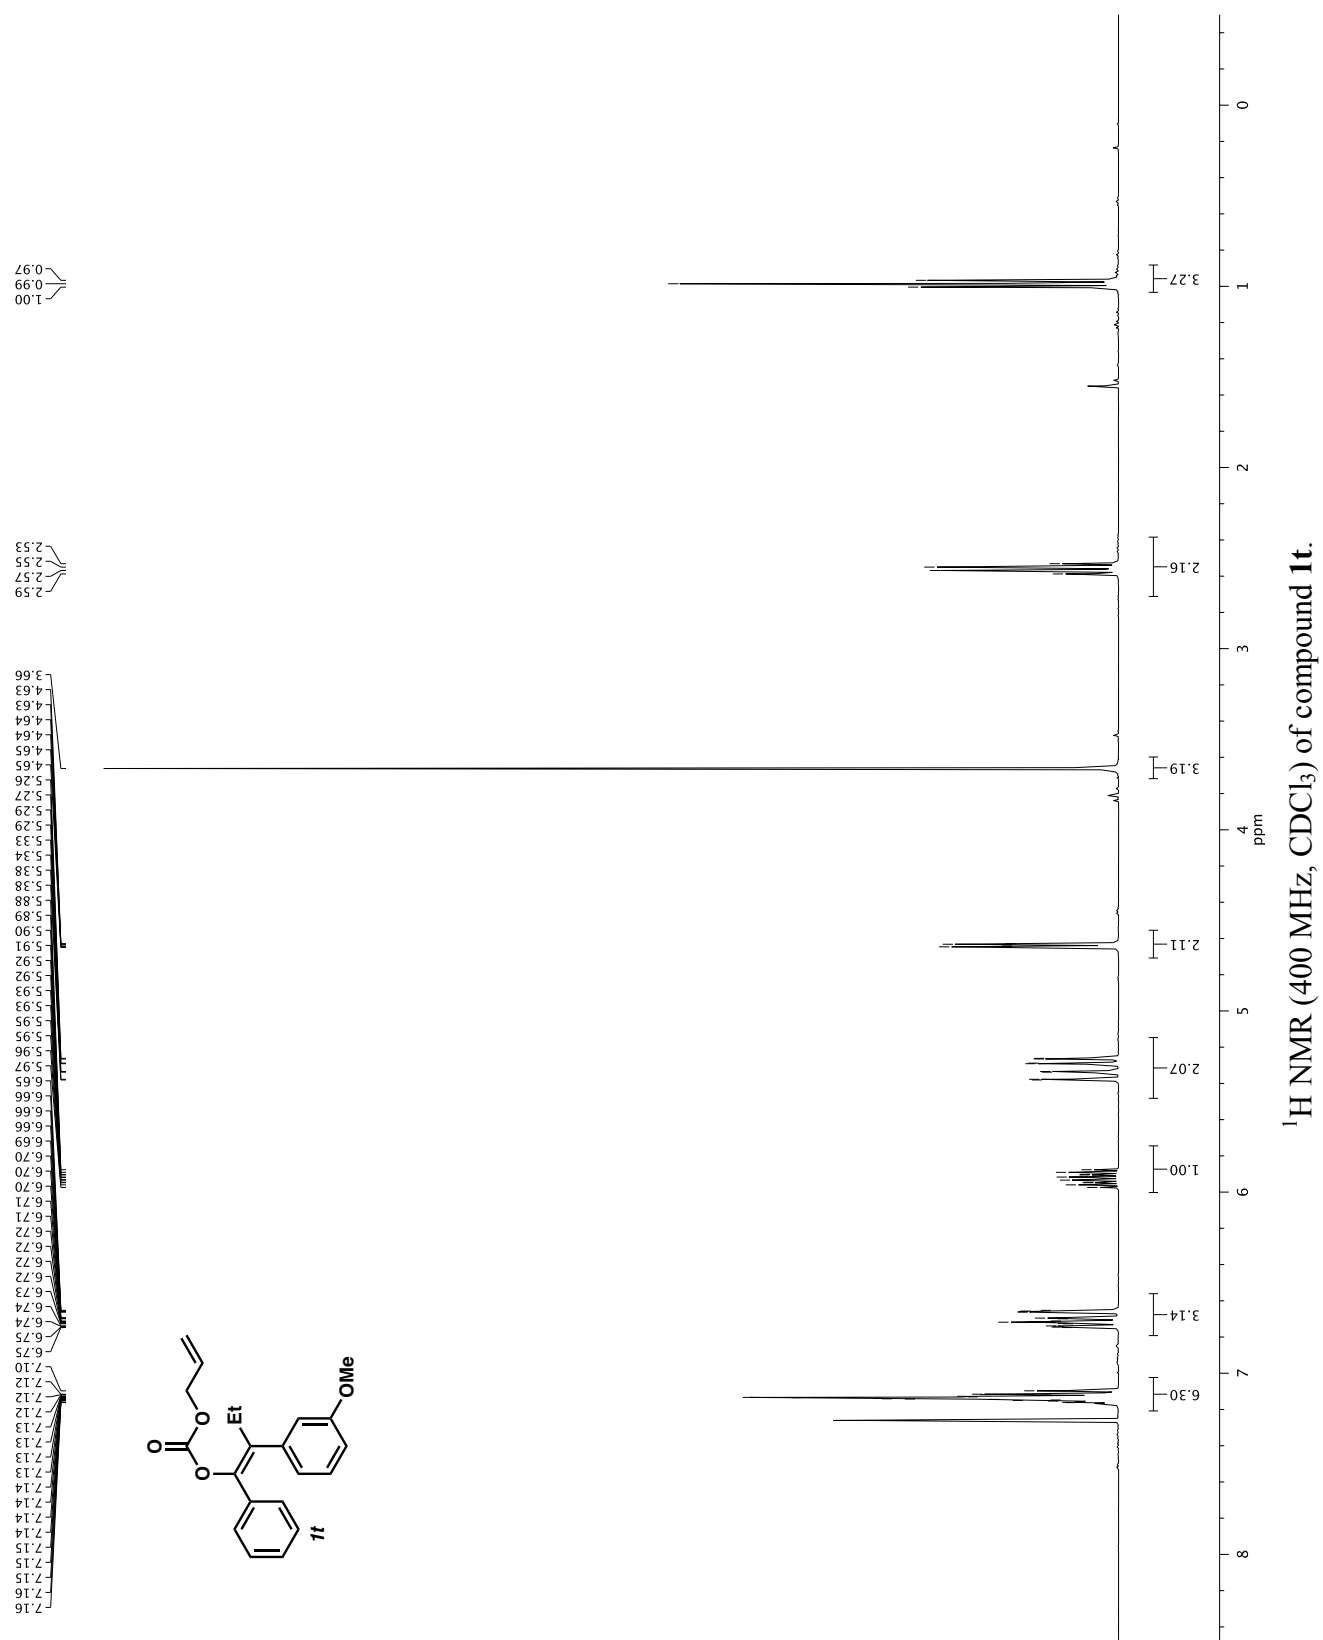

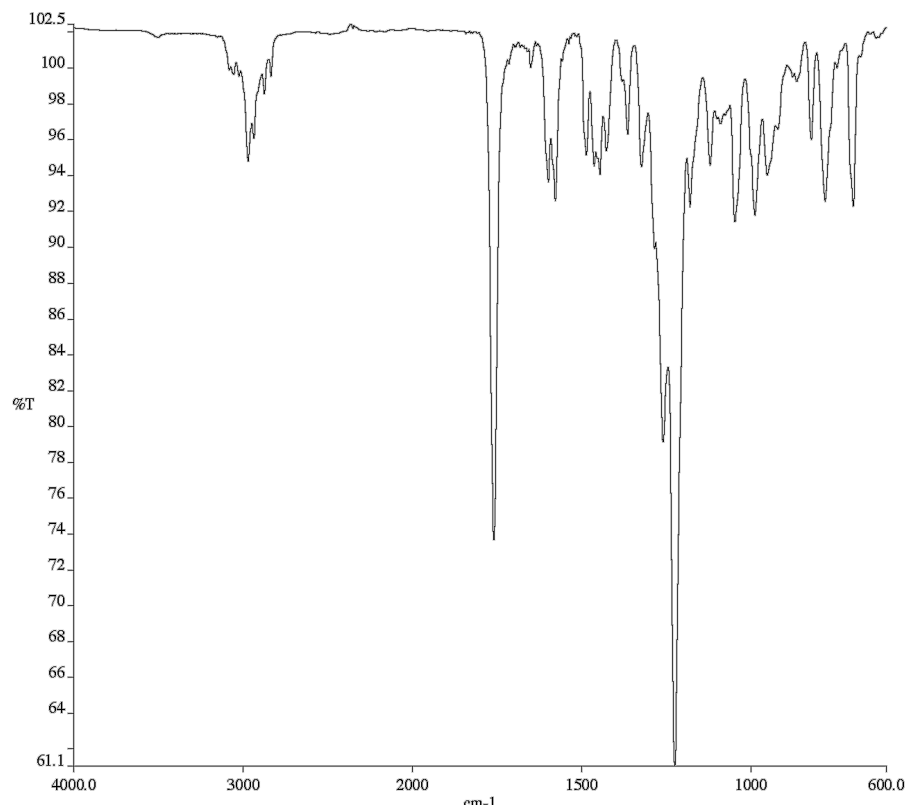Infrared spectrum (Thin Film, NaCl) of compound **1t**.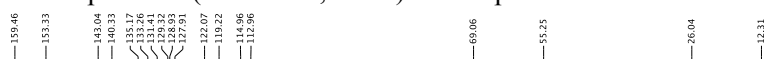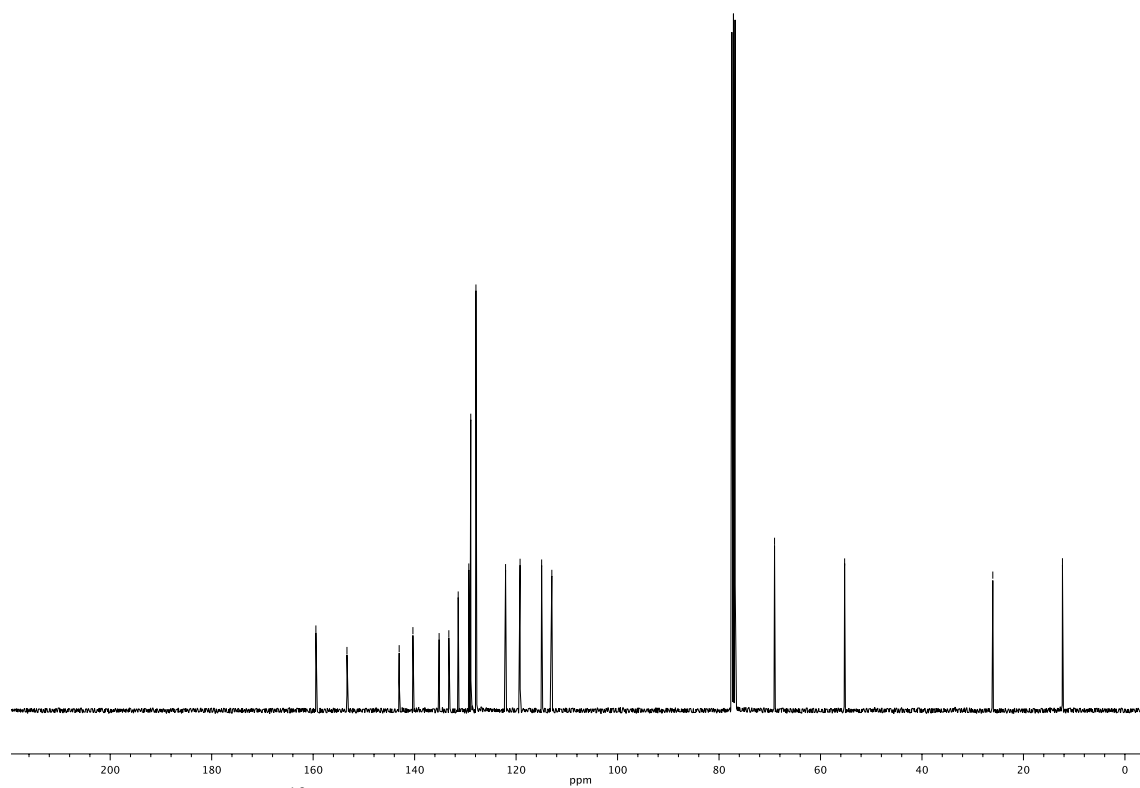<sup>13</sup>C NMR (100 MHz, CDCl<sub>3</sub>) of compound **1t**.

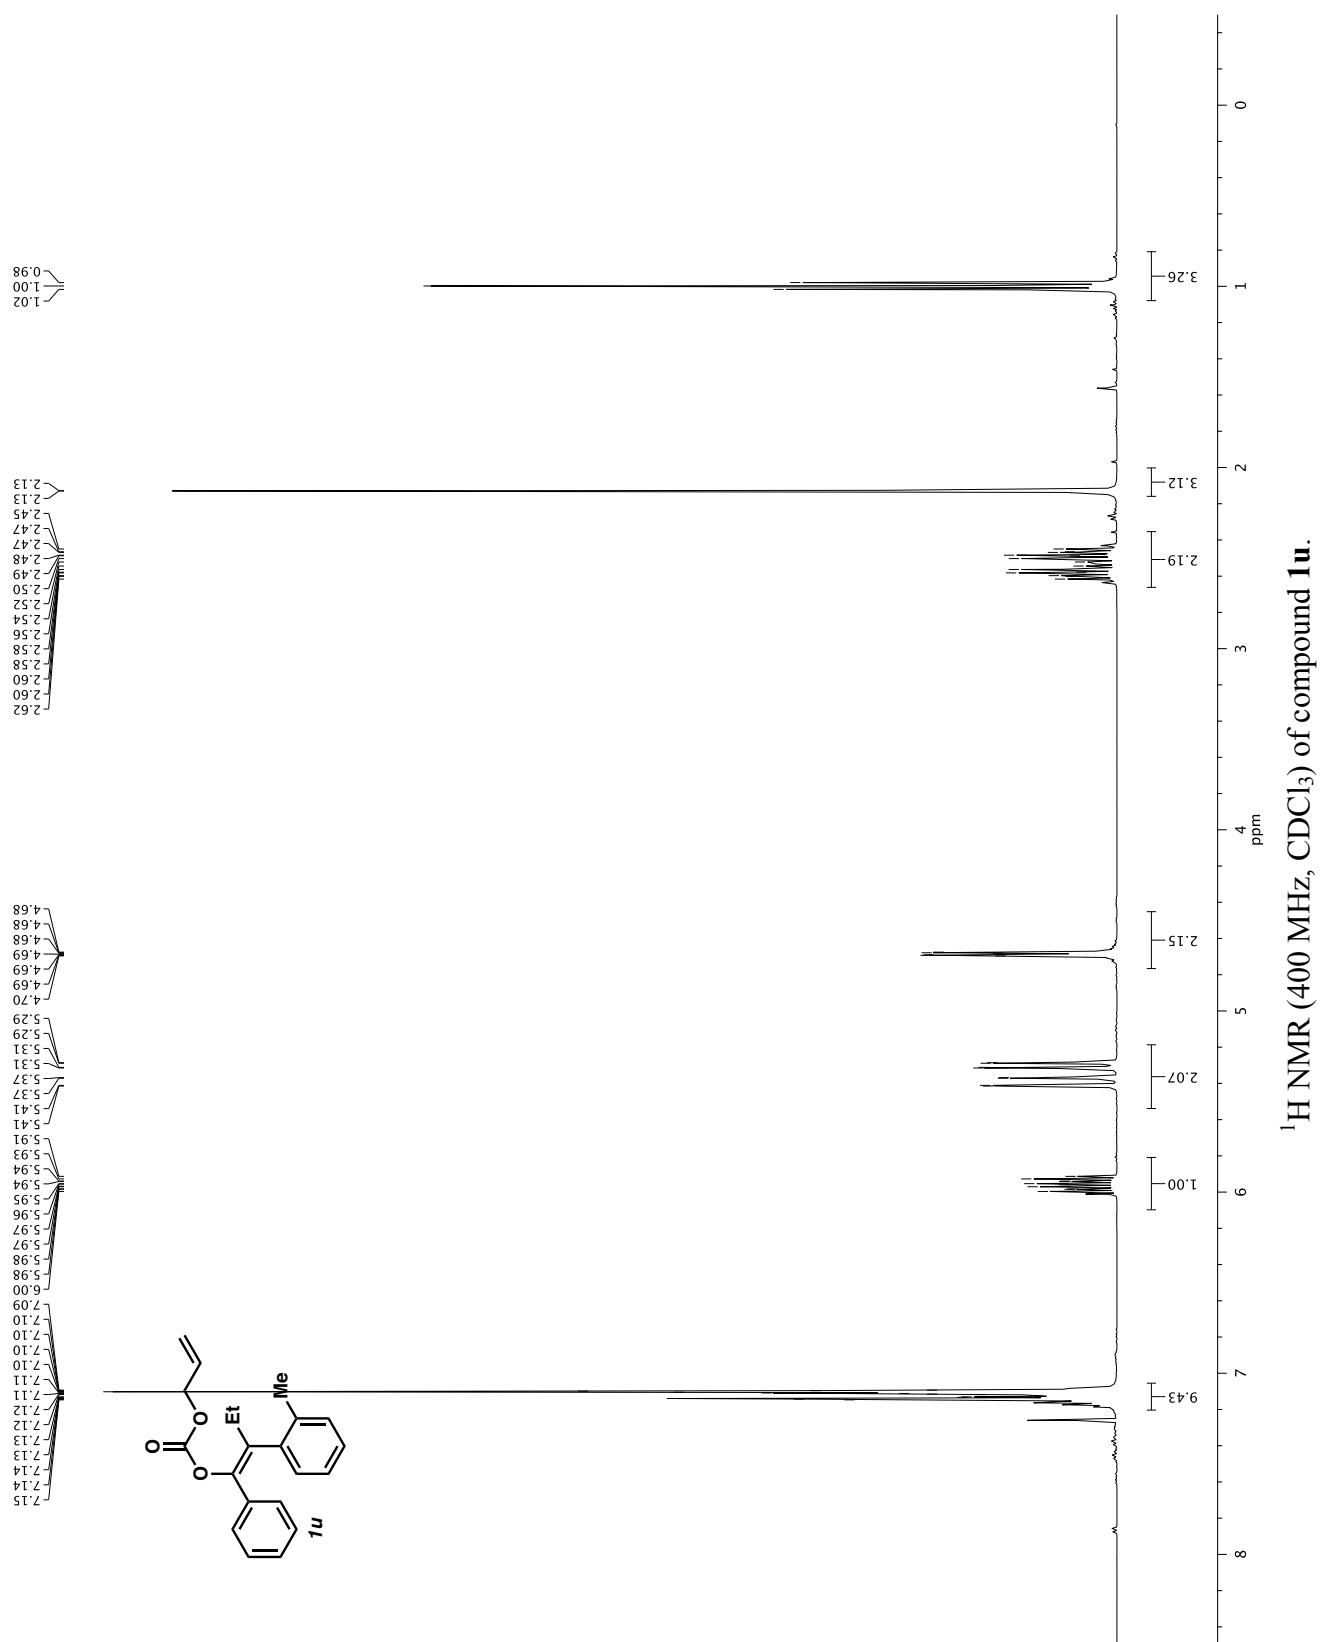

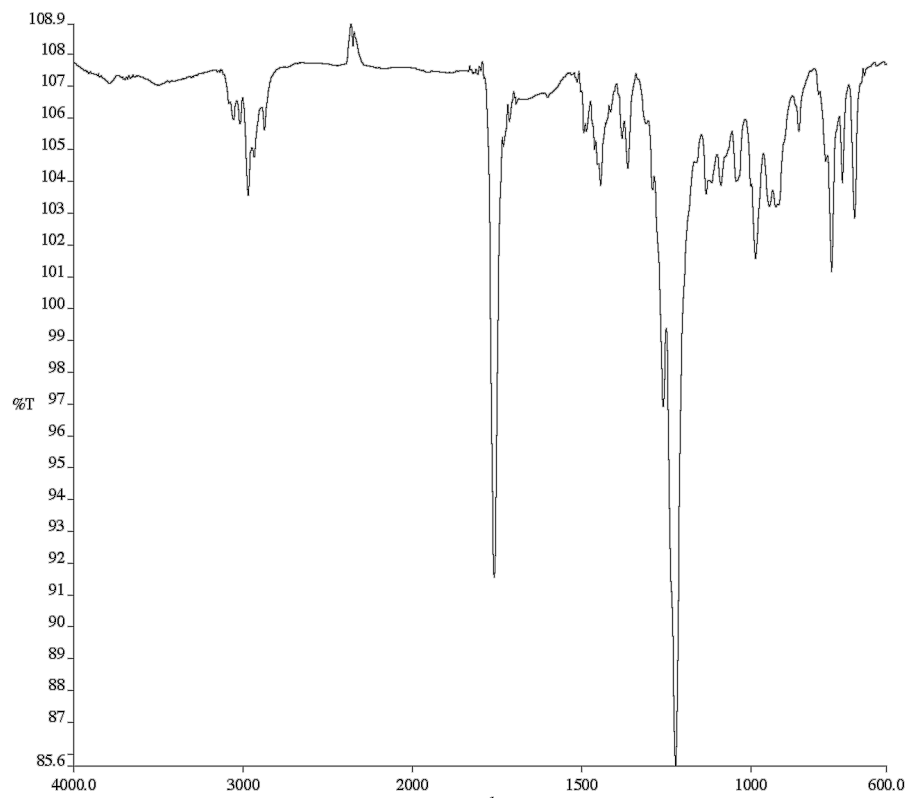Infrared spectrum (Thin Film, NaCl) of compound **1u**.

1532.43  
1427.72  
1388.11  
1366.18  
1322.13  
1307.52  
1289.74  
1277.86  
1272.37  
1158.13  
89.01  
26.25  
19.57  
11.63

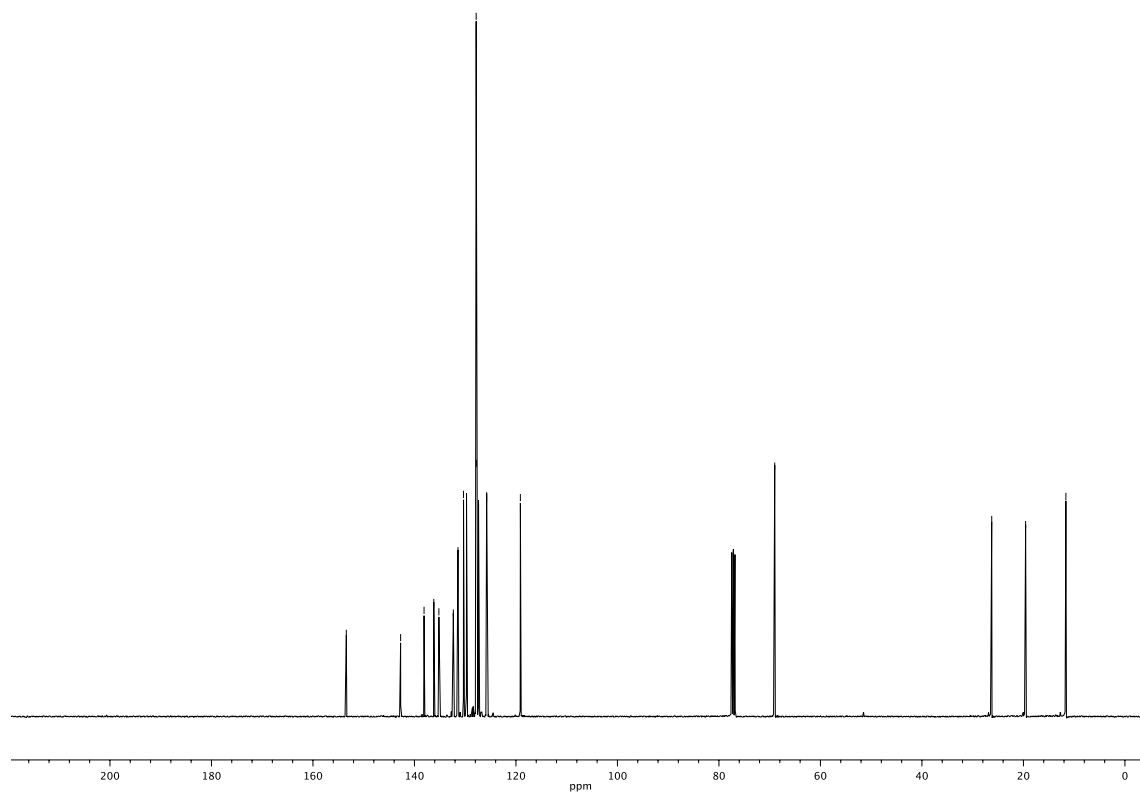 $^{13}\text{C}$  NMR (100 MHz,  $\text{CDCl}_3$ ) of compound **1u**.

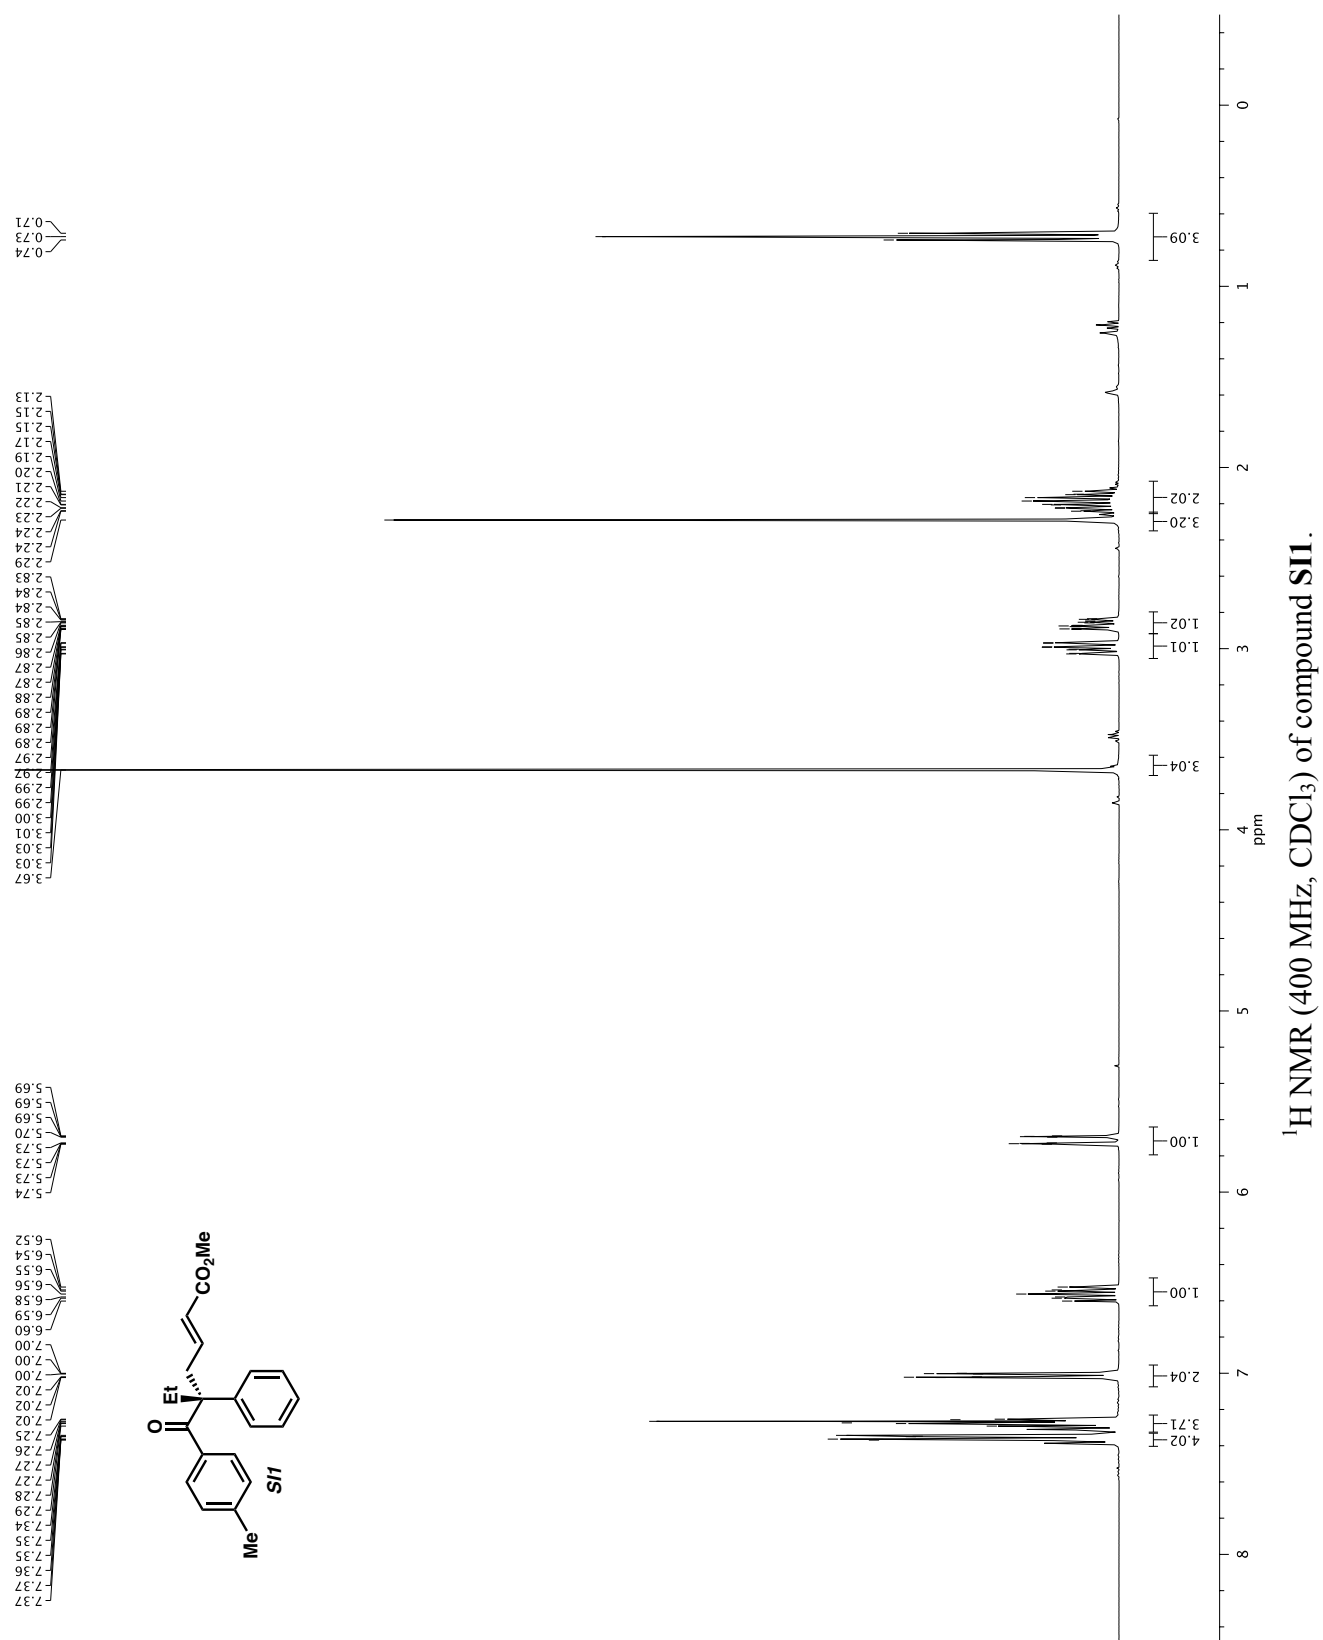

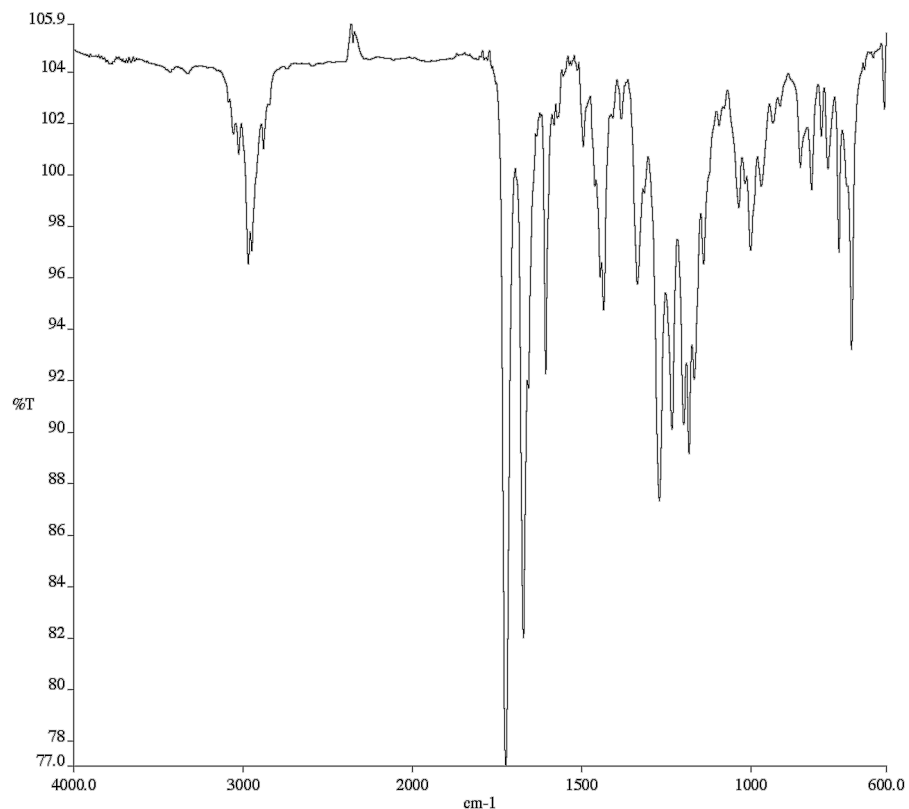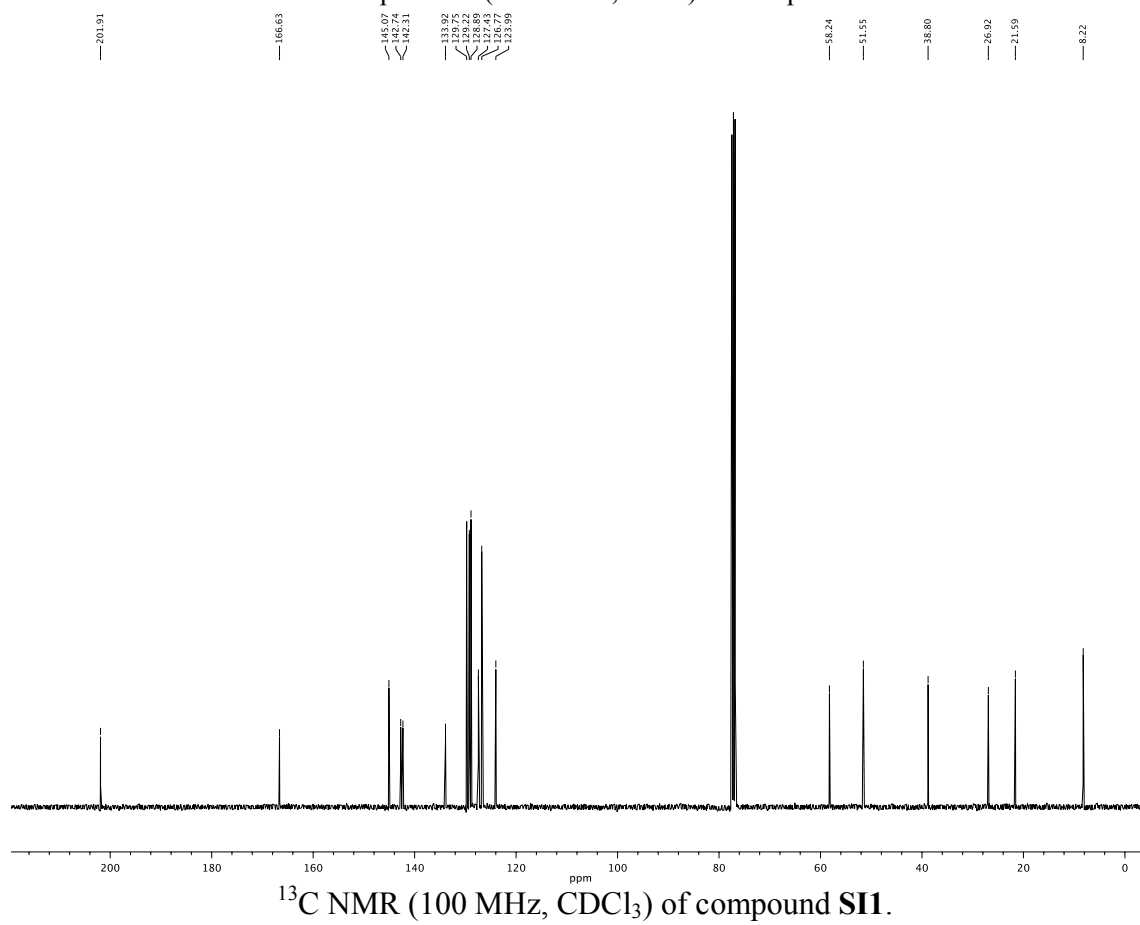



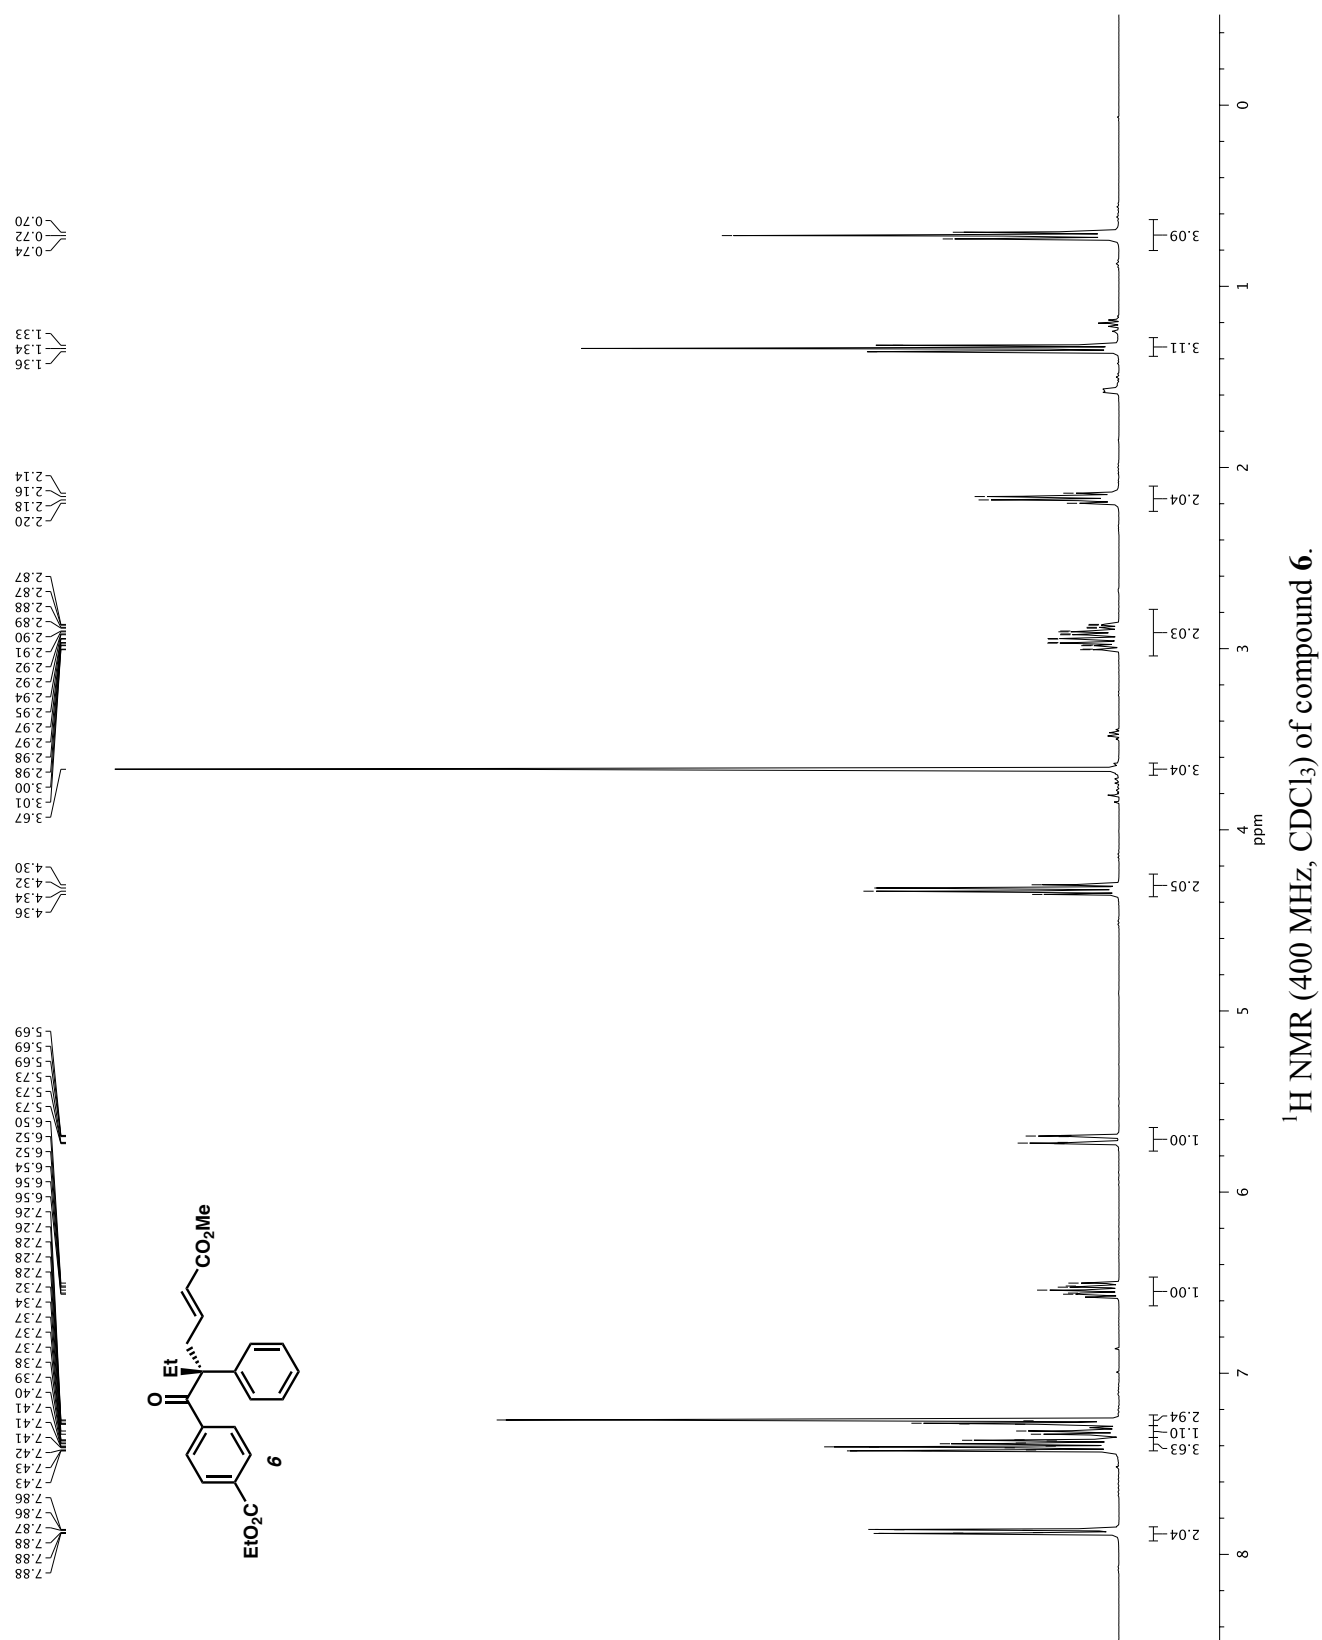

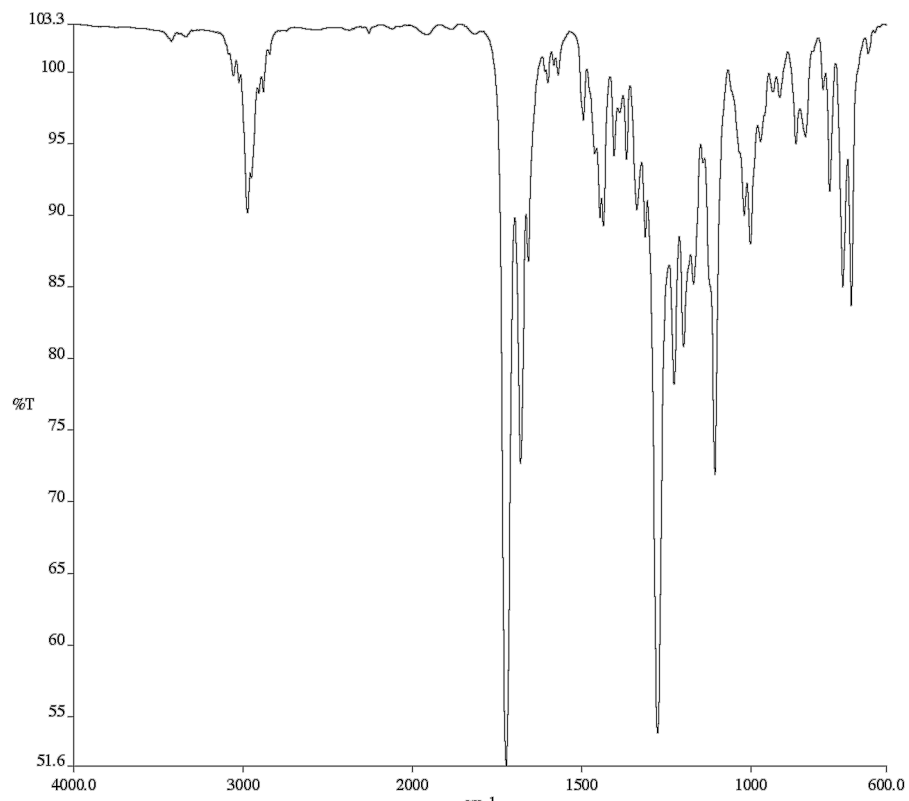

Infrared spectrum (Thin Film, NaCl) of compound 6.

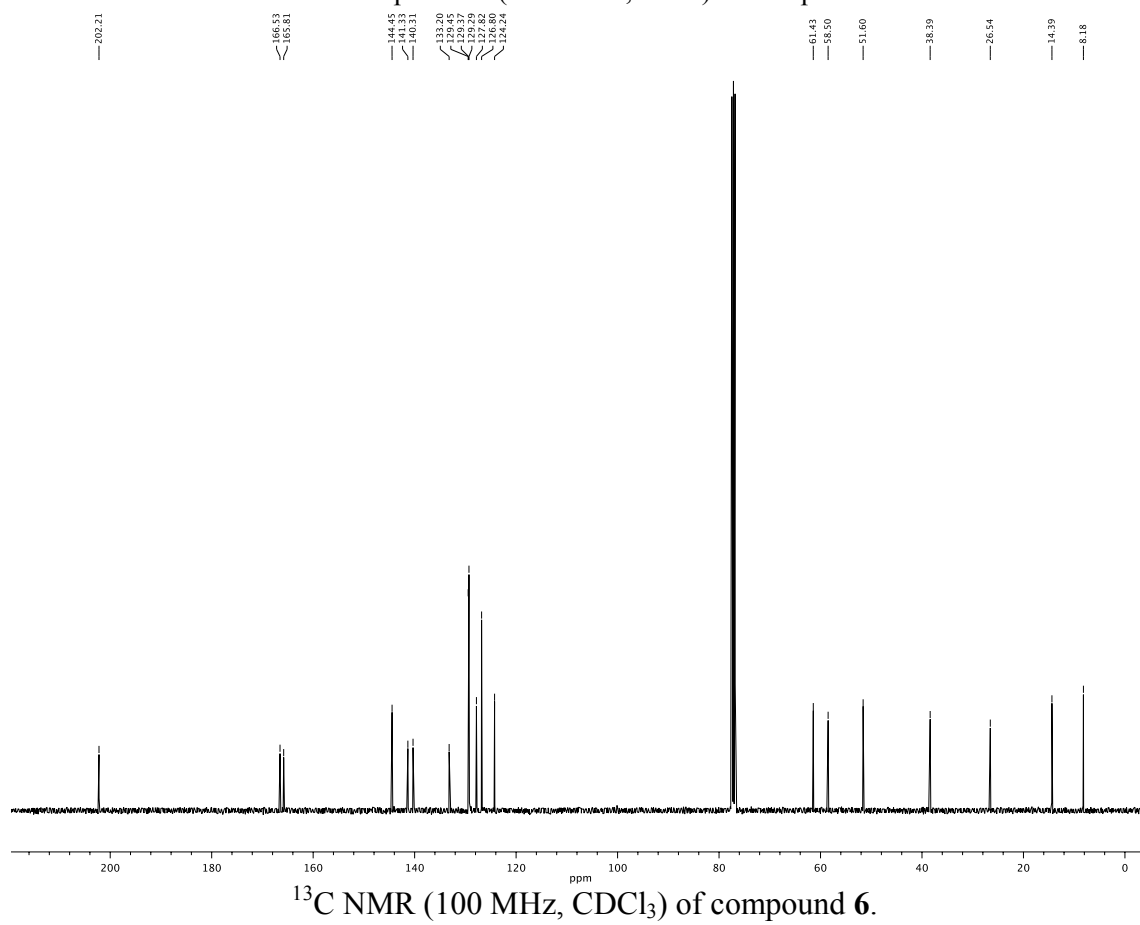<sup>13</sup>C NMR (100 MHz, CDCl<sub>3</sub>) of compound 6.

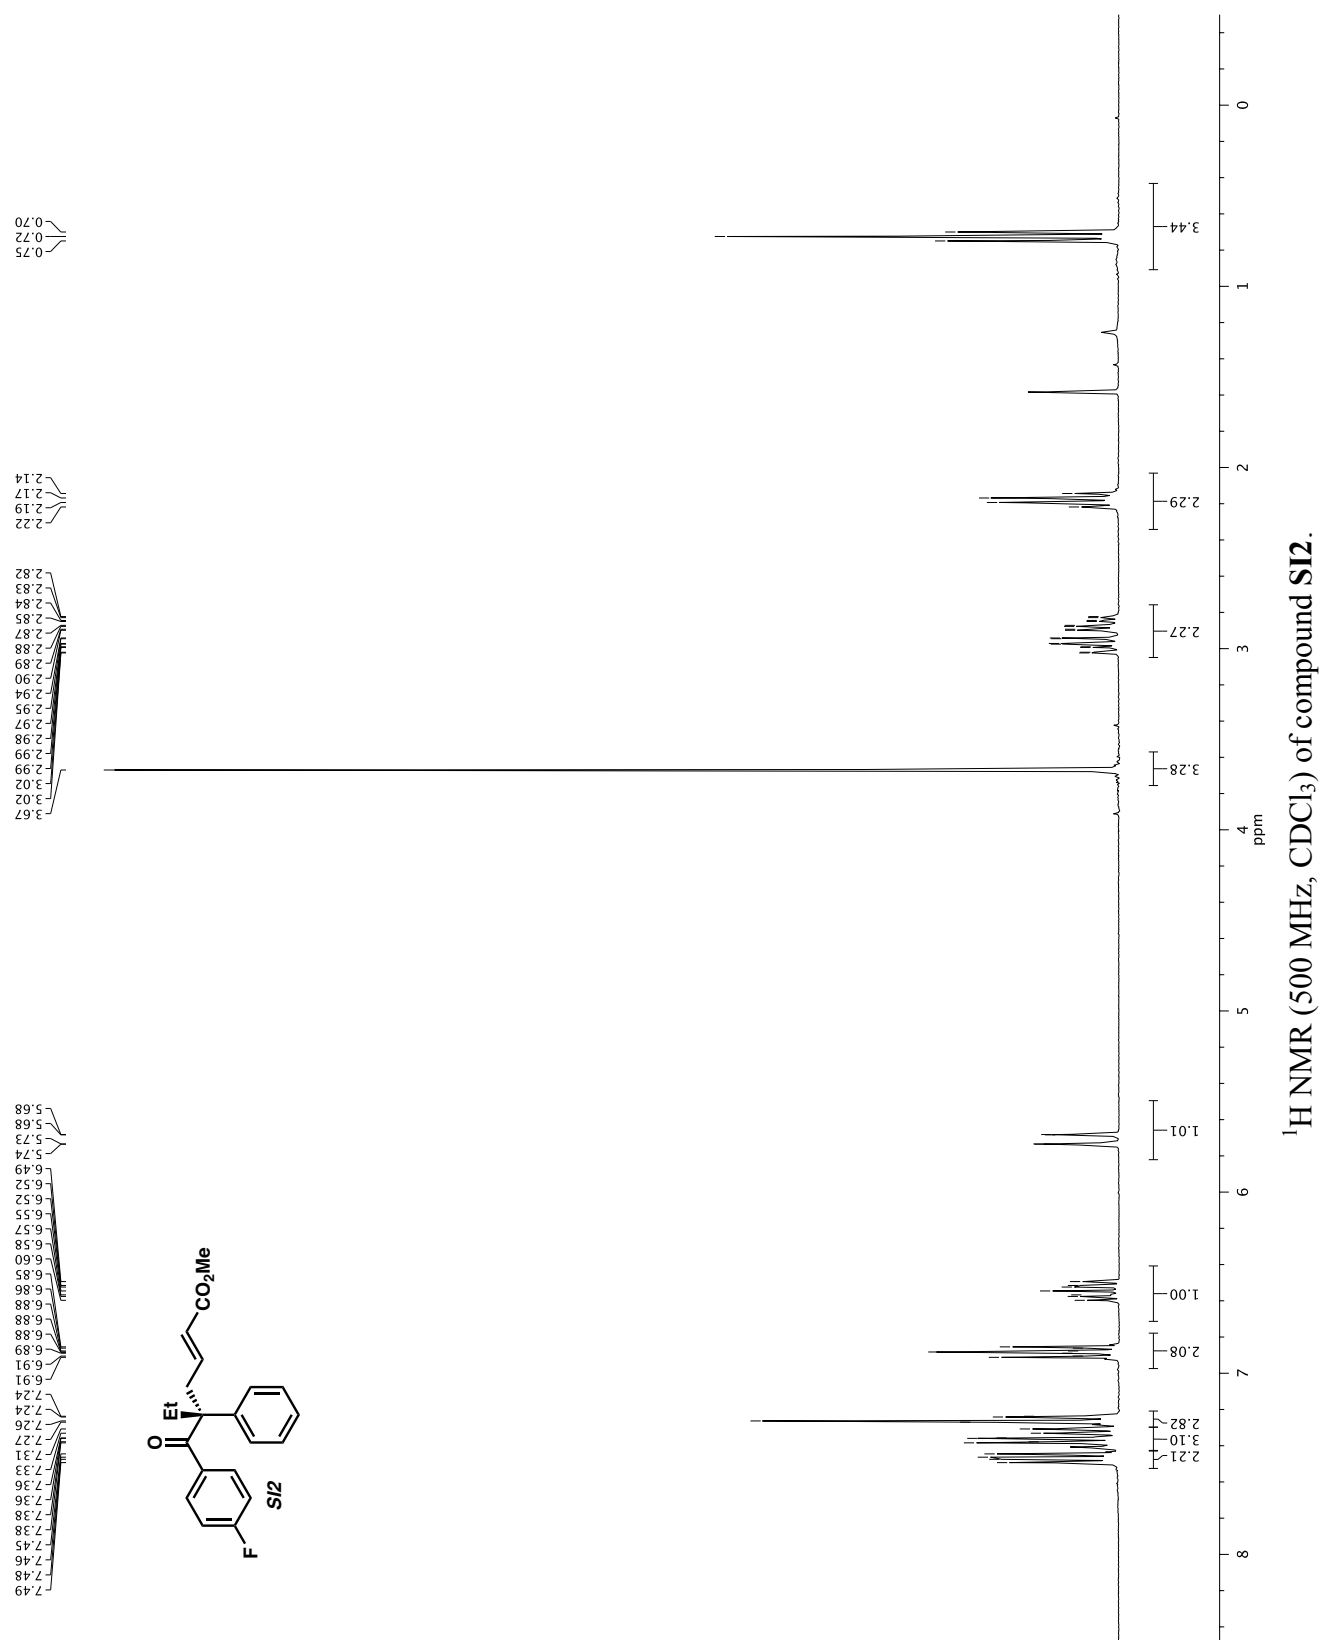

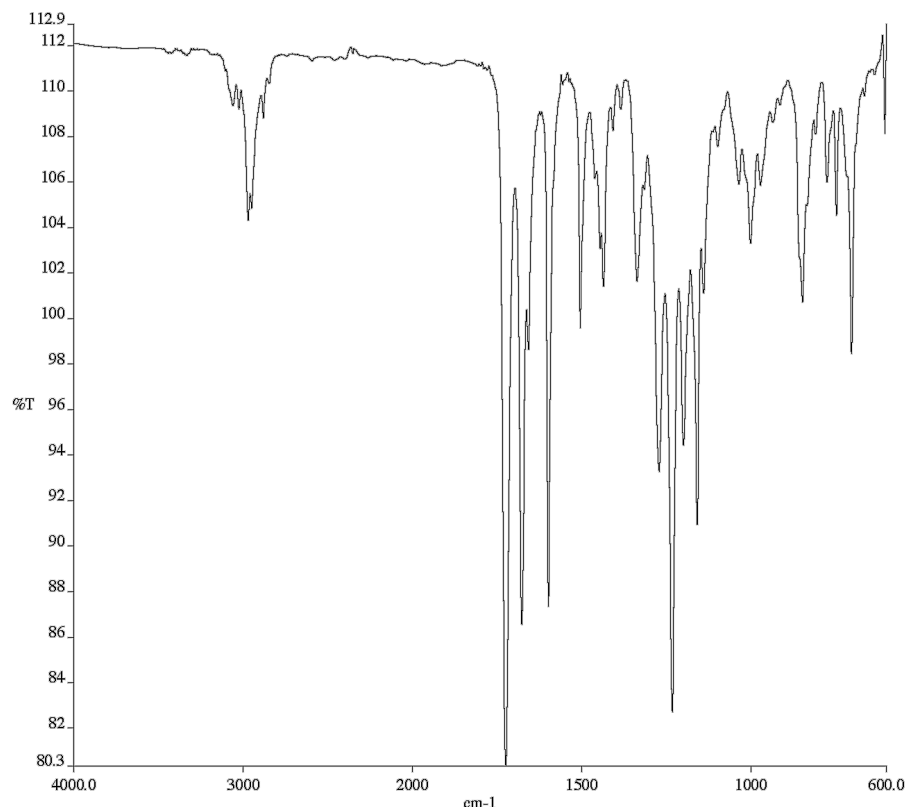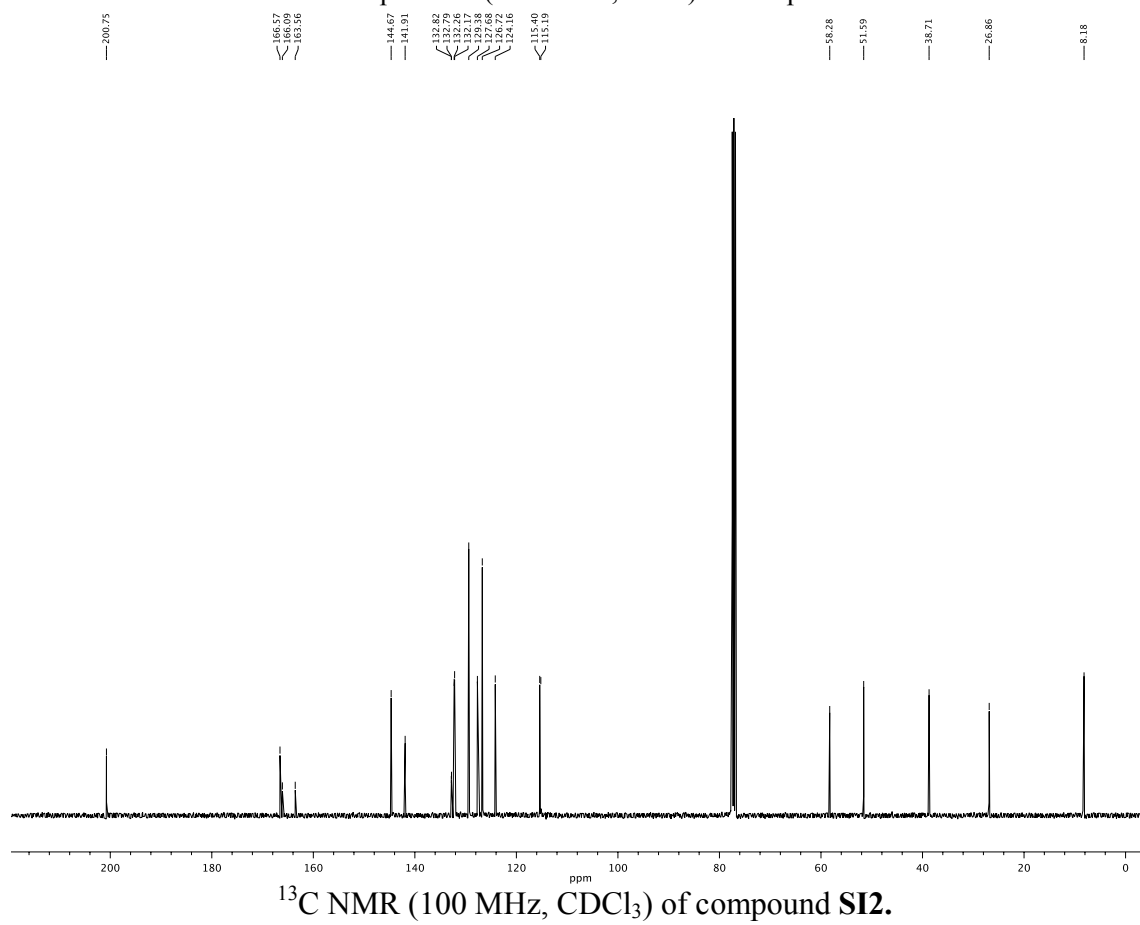

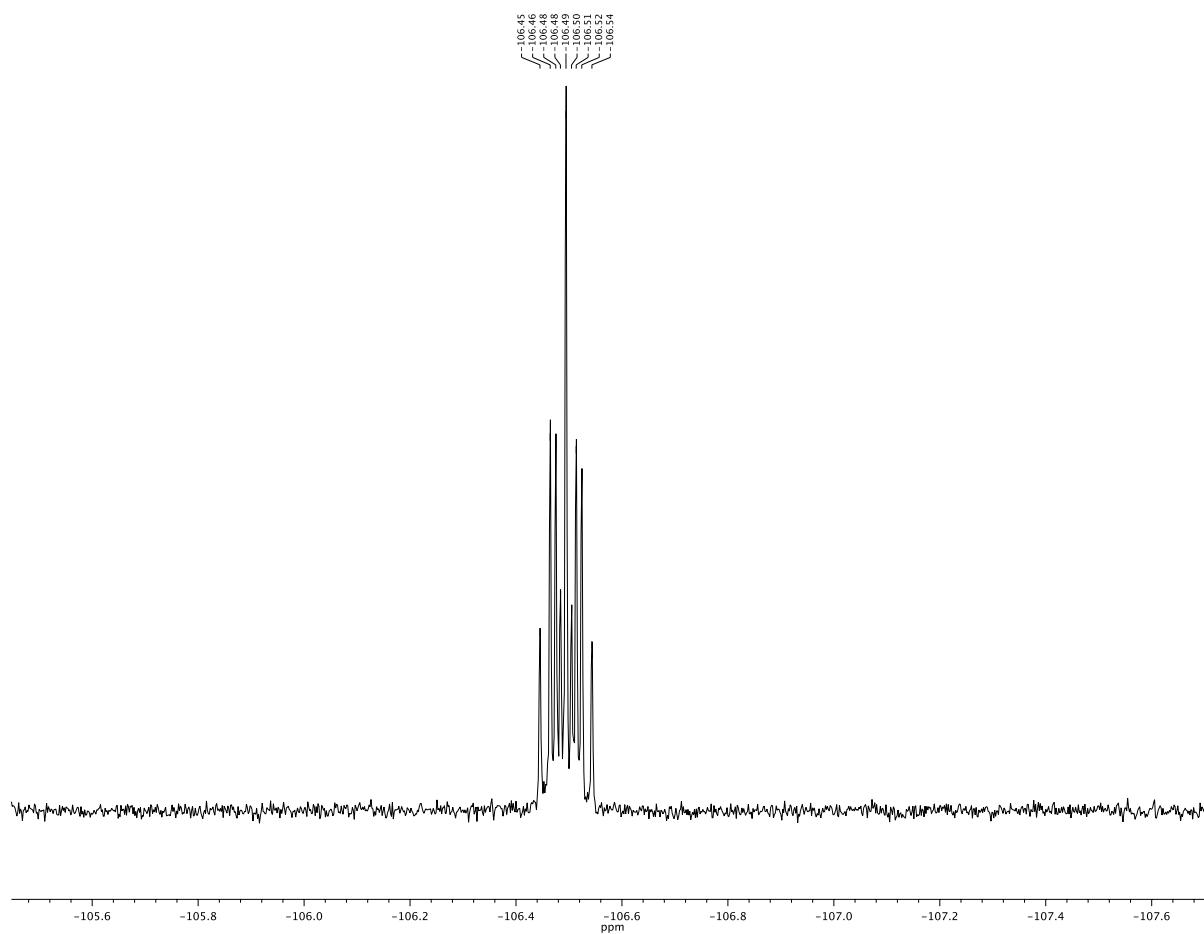

<sup>19</sup>F NMR (282 MHz, CDCl<sub>3</sub>) of compound **SI2**.

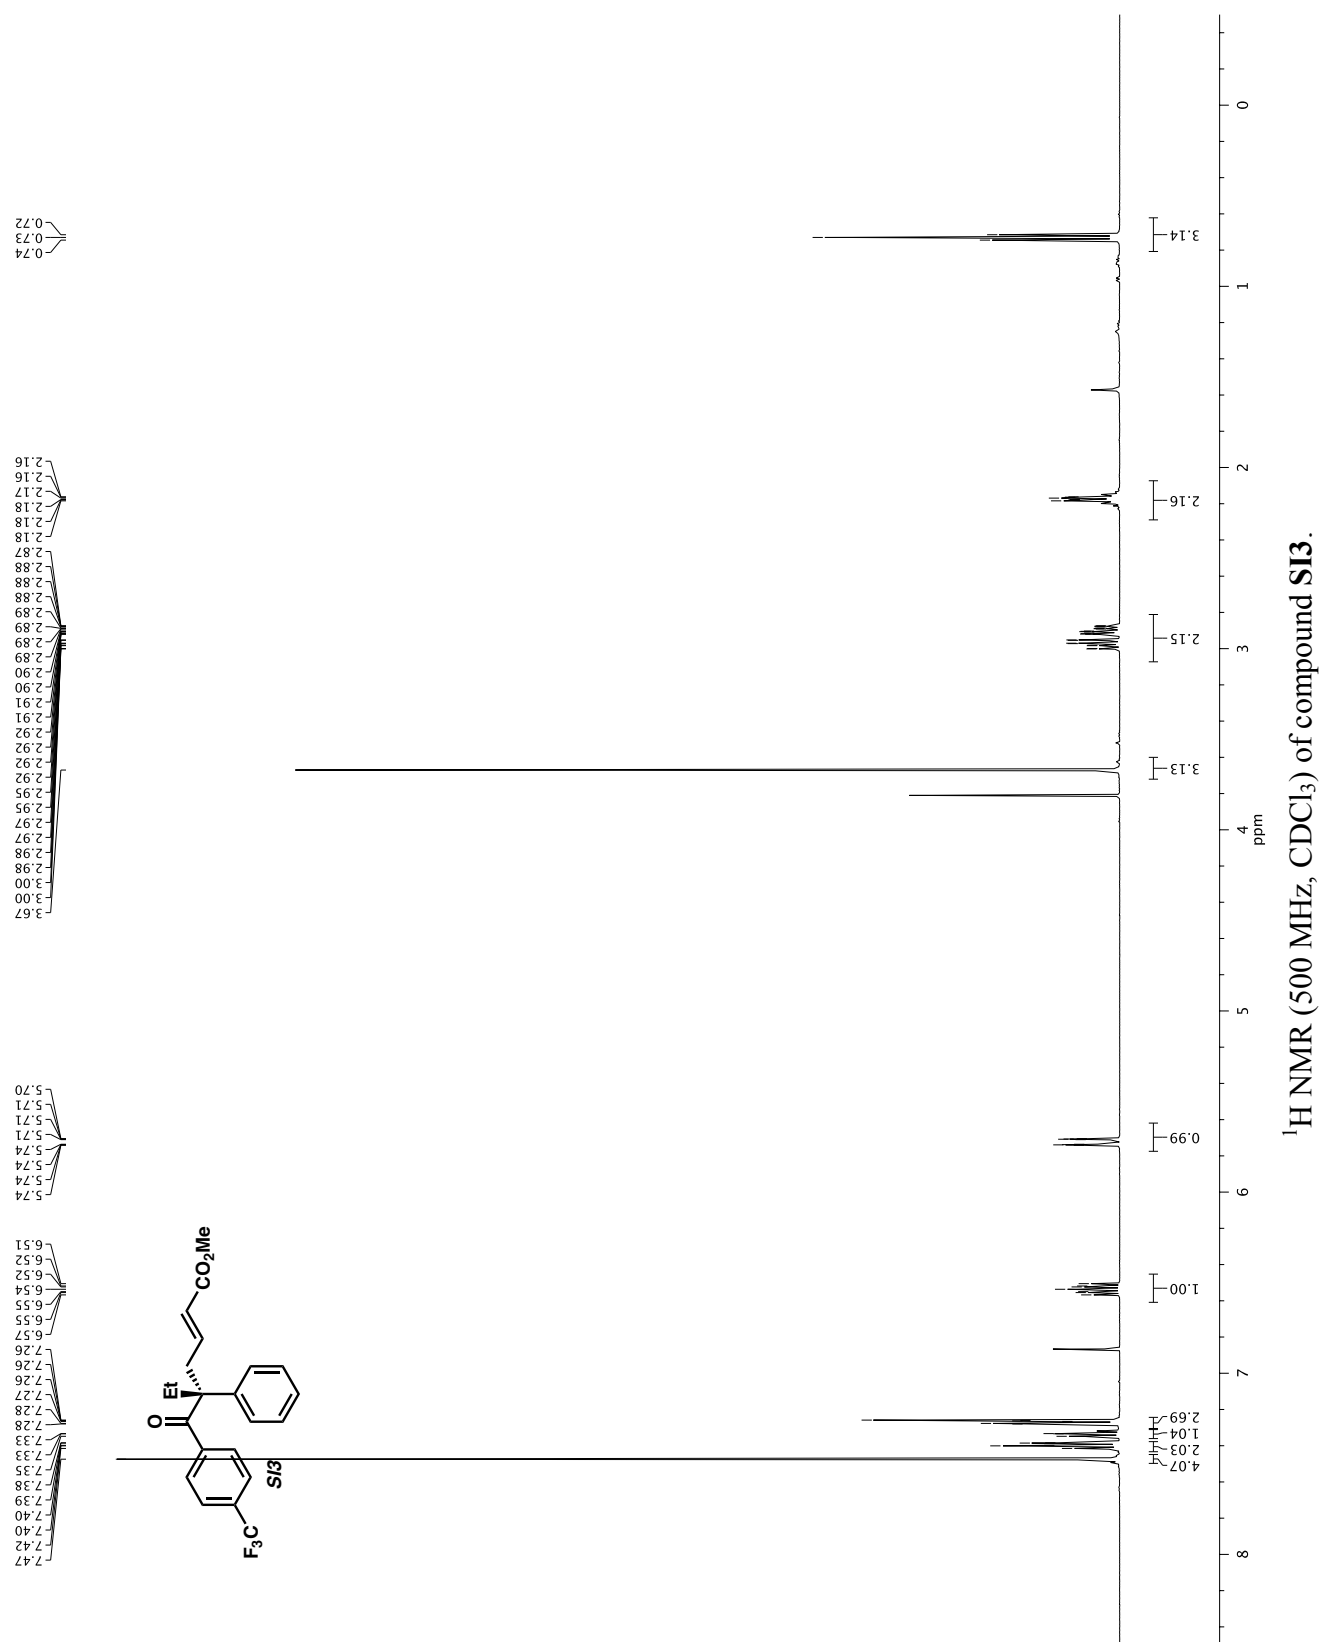

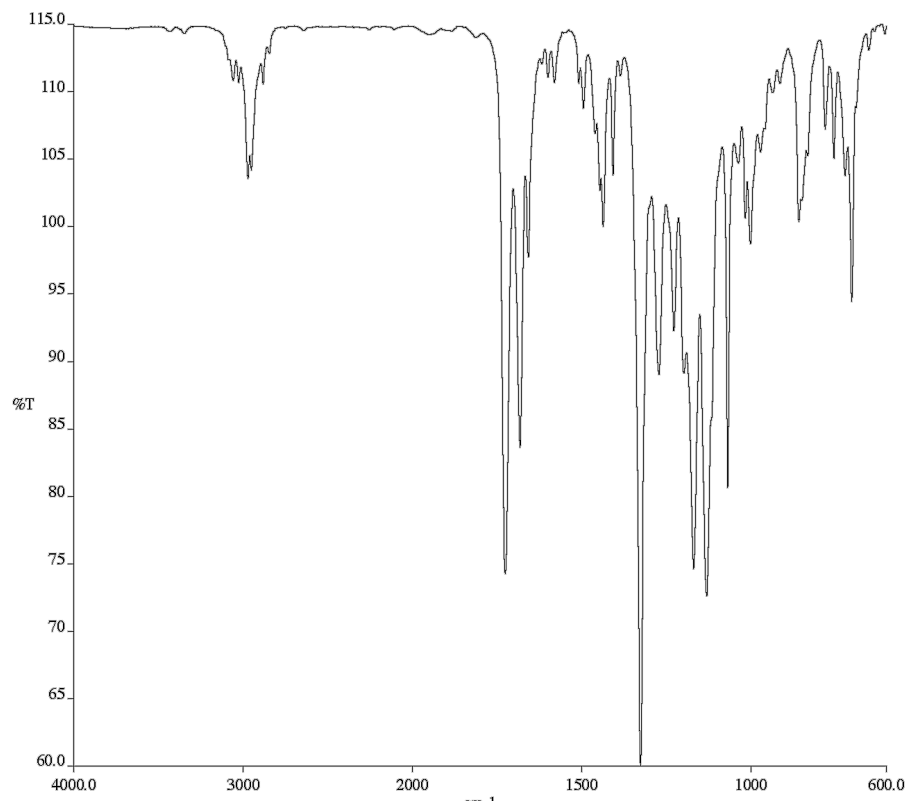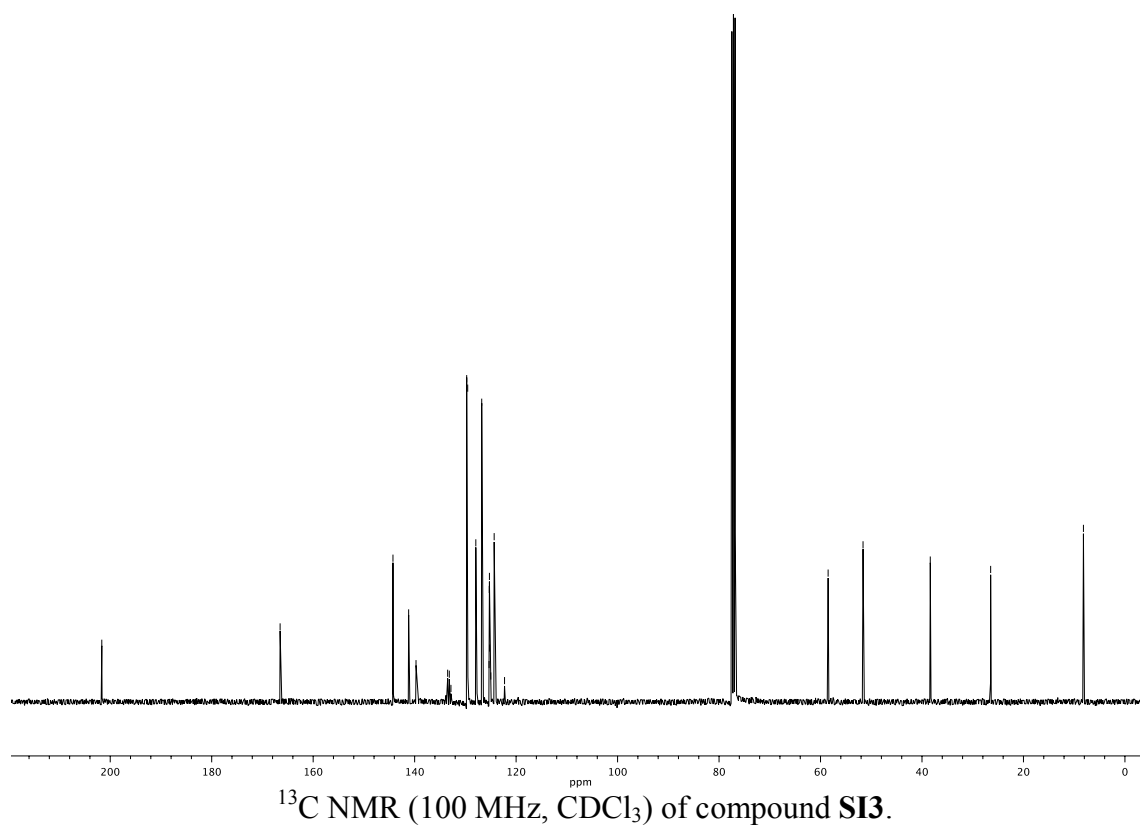

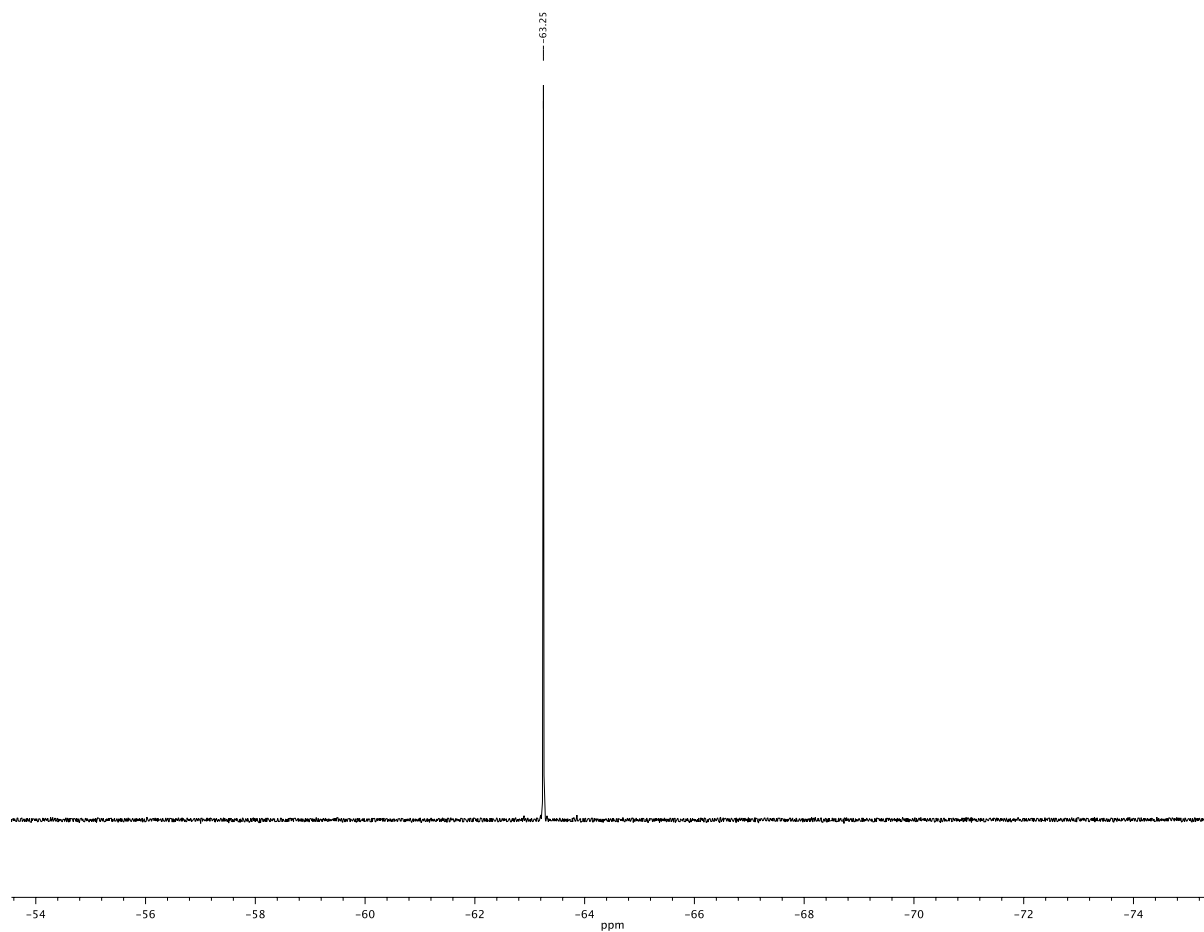

$^{19}\text{F}$  NMR (282 MHz,  $\text{CDCl}_3$ ) of compound **SI3**.



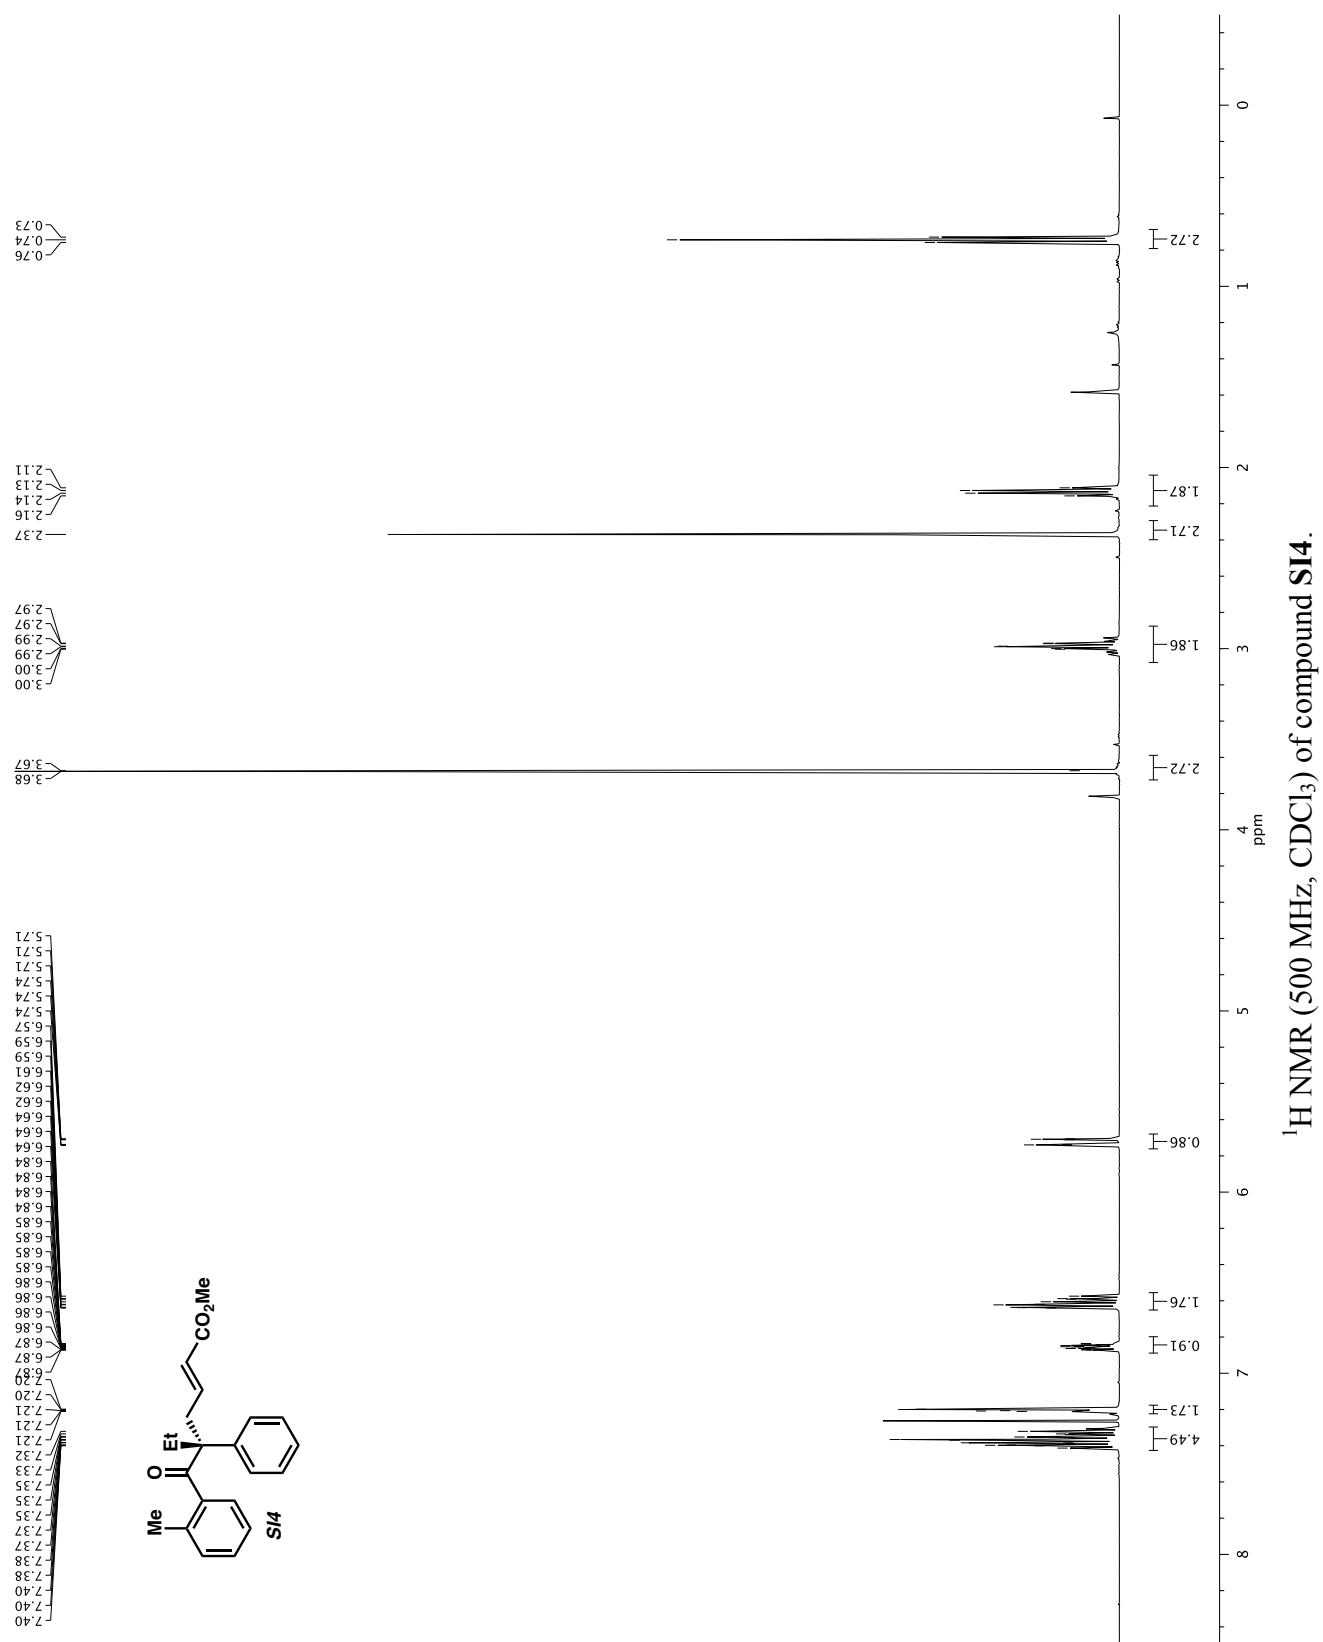

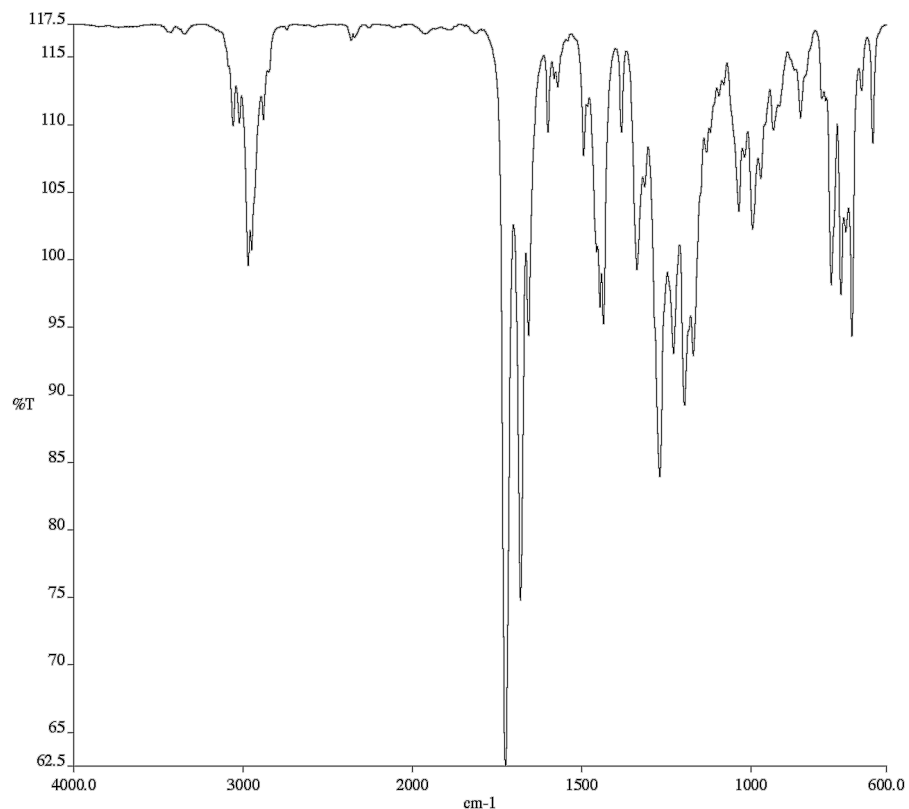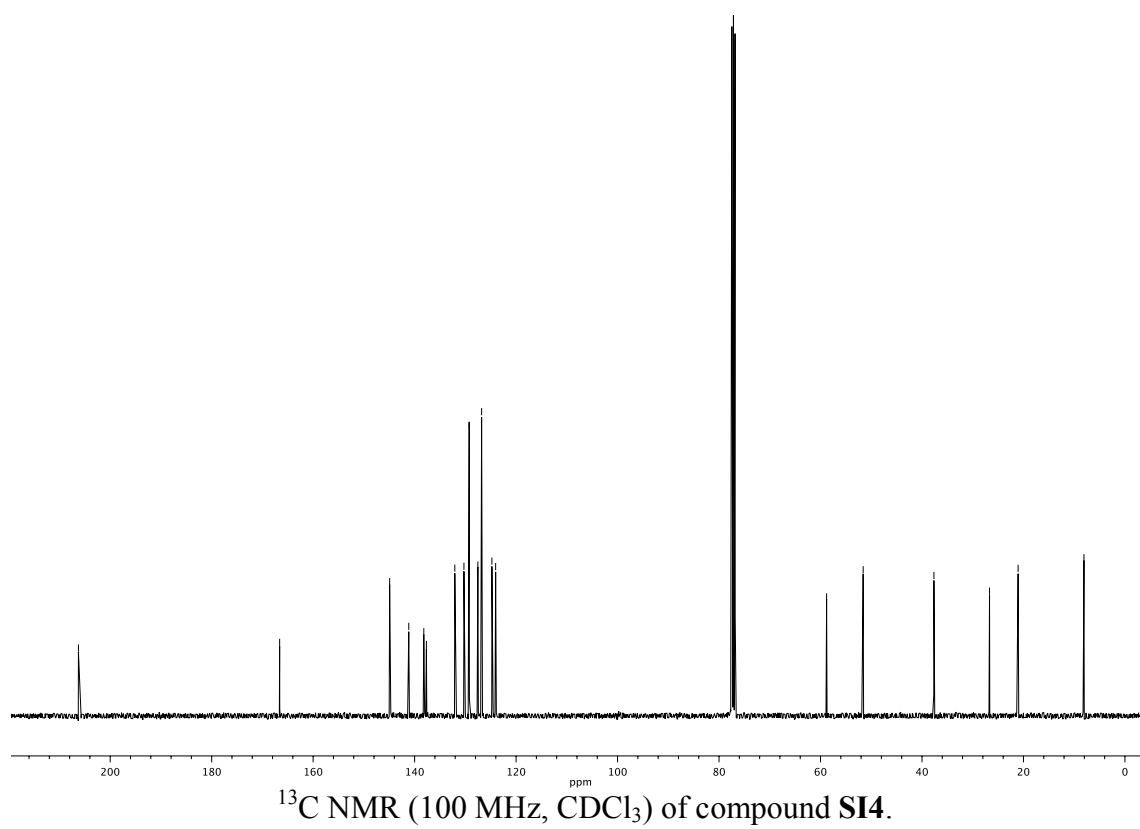

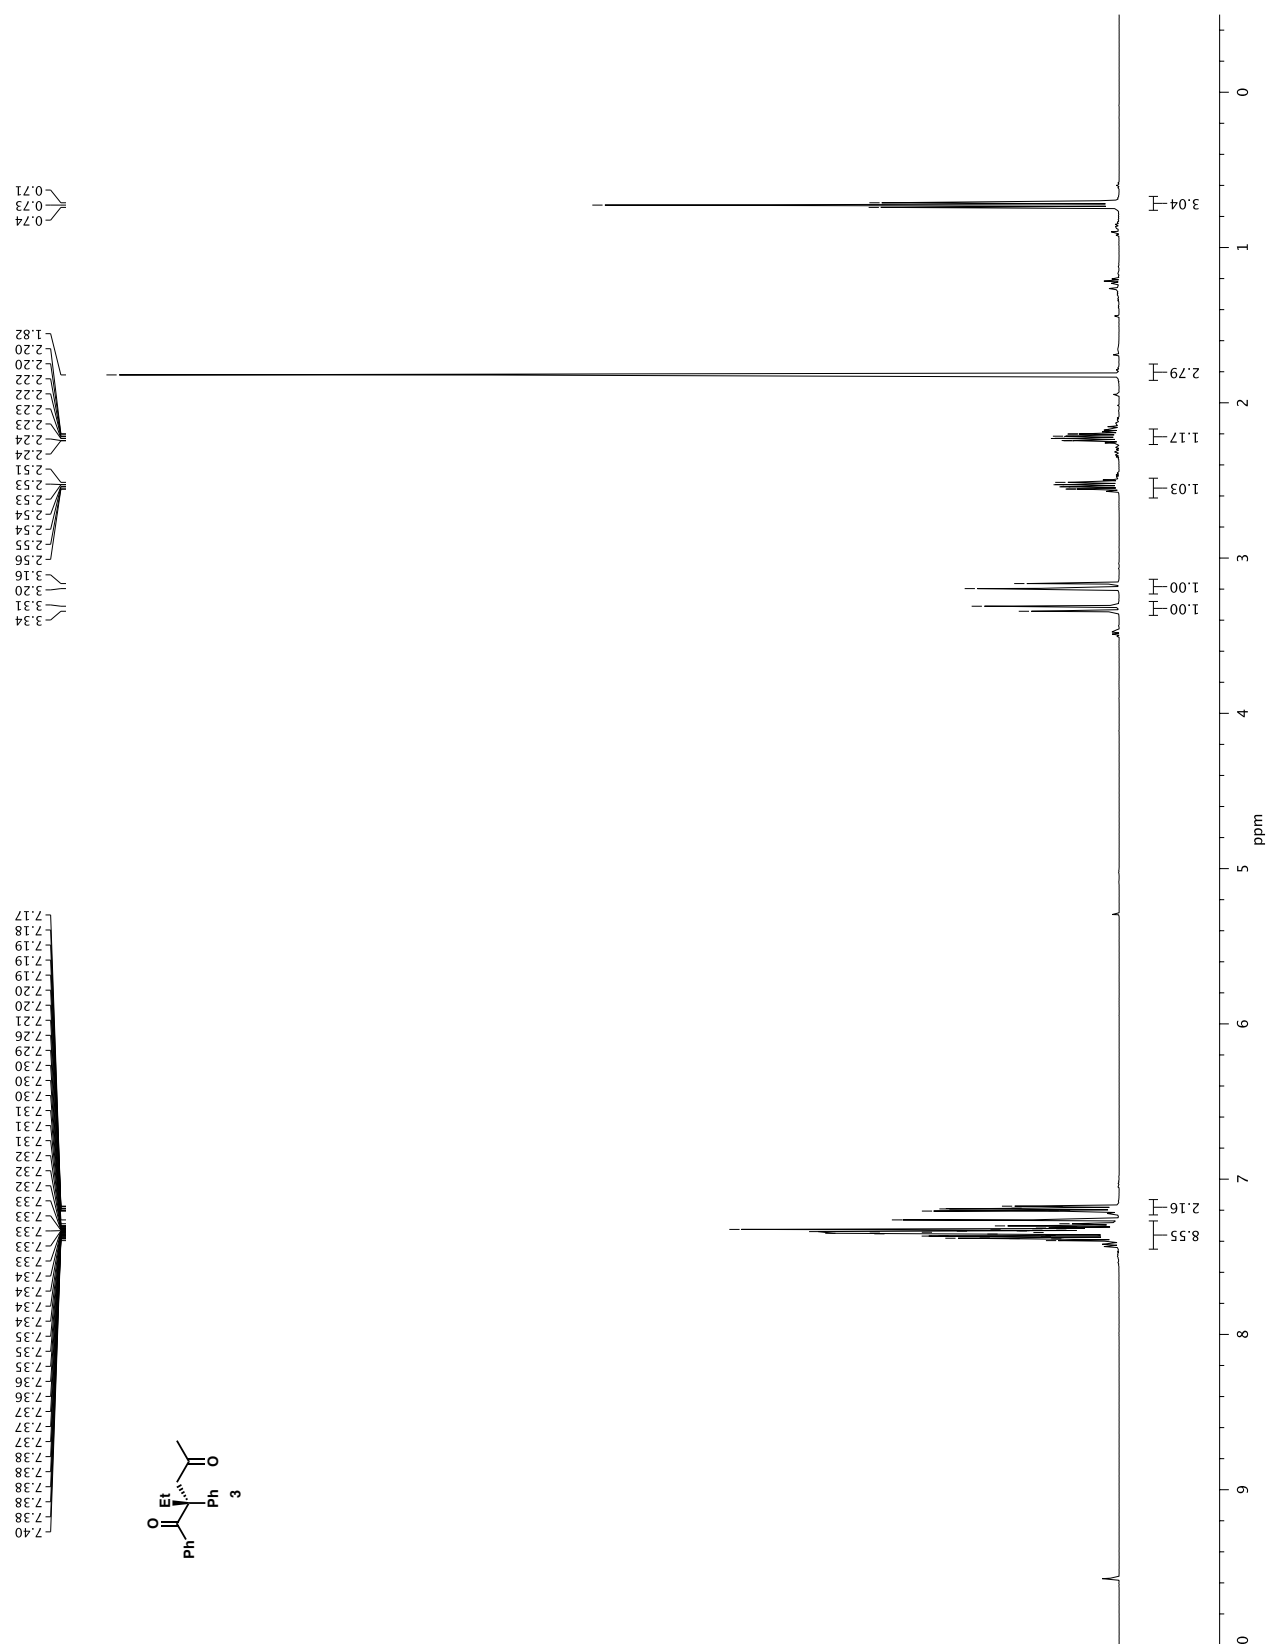

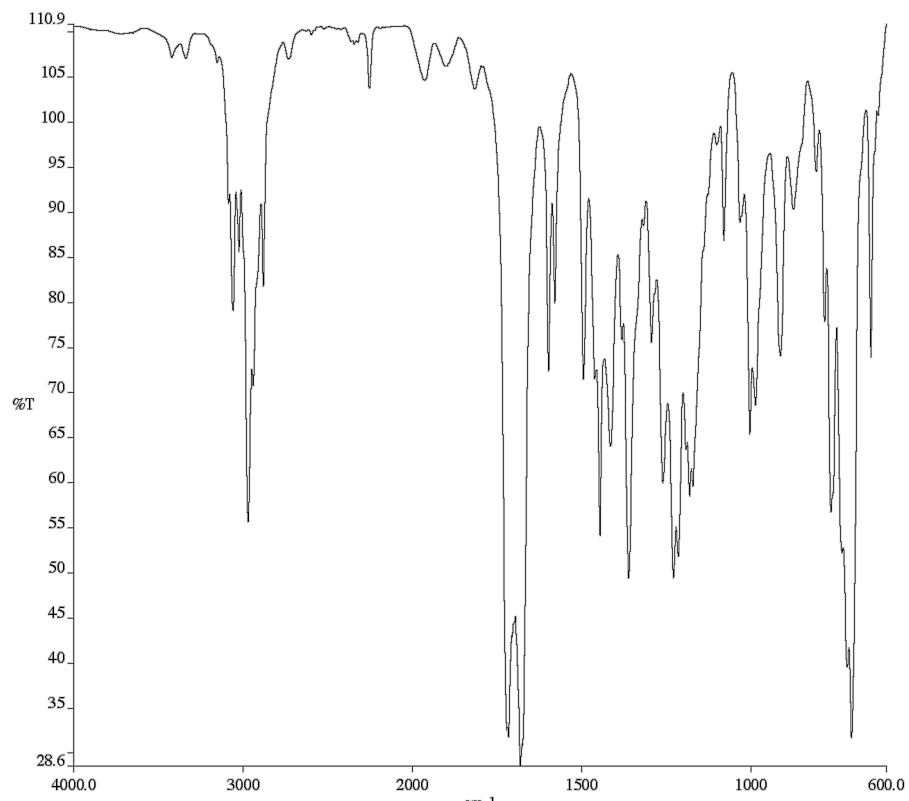

Infrared spectrum (Thin Film, NaCl) of compound 3.

— 2073.31  
— 2022.66— 1414.44  
— 1377.47  
— 1328.51  
— 1292.00  
— 1258.04  
— 1216.87

— 56.98

— 47.54

— 31.78

— 27.18

— 8.06

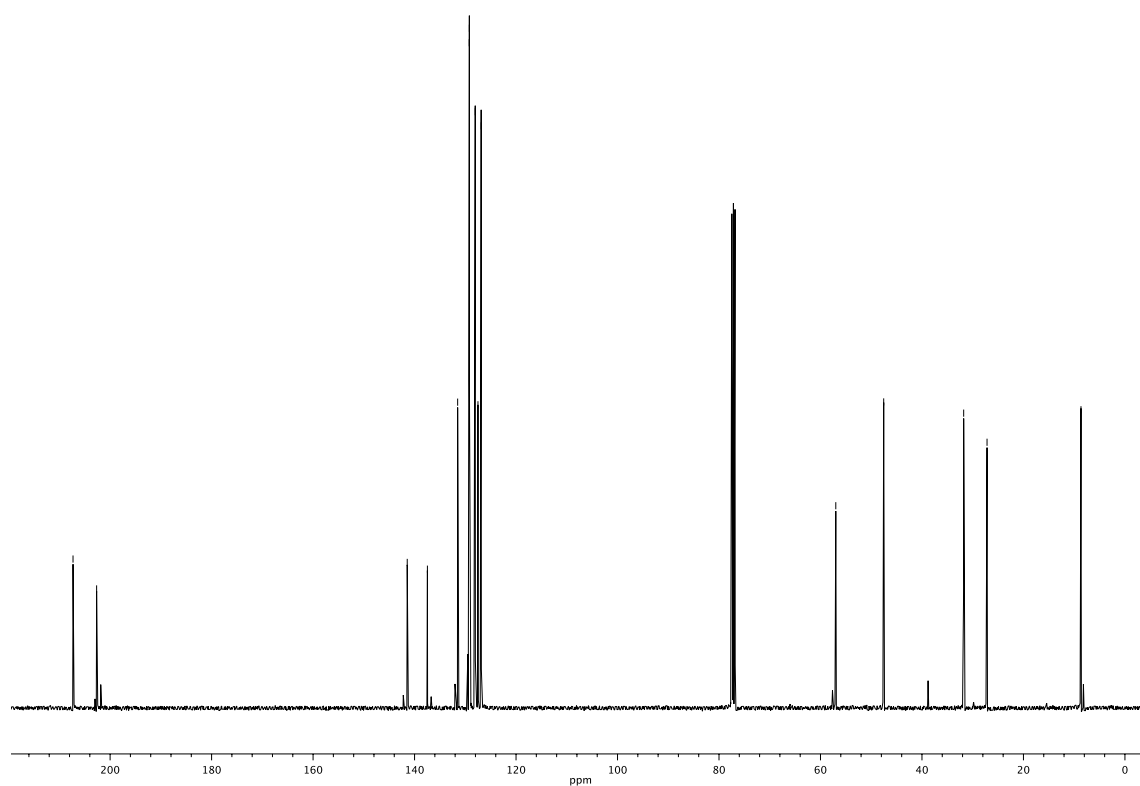<sup>13</sup>C NMR (100 MHz, CDCl<sub>3</sub>) of compound 3.

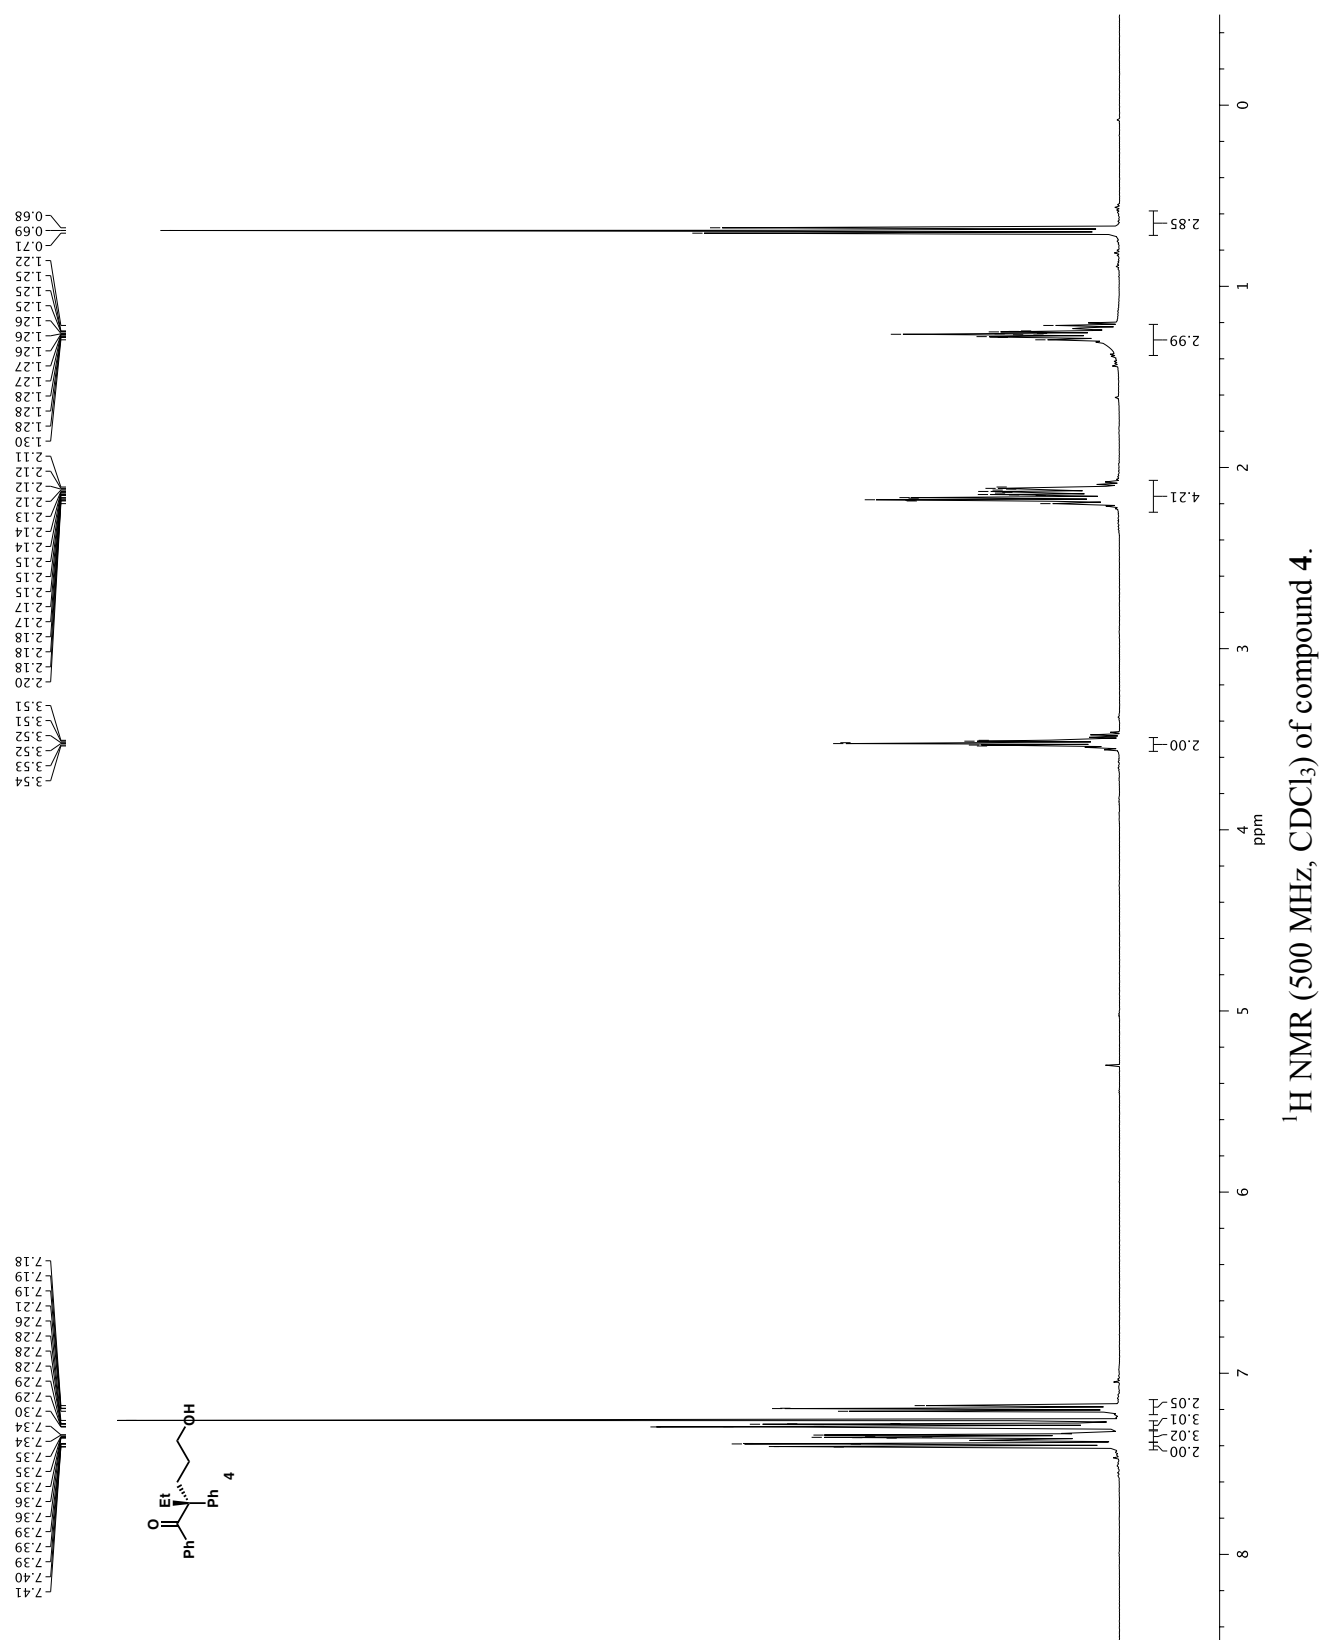

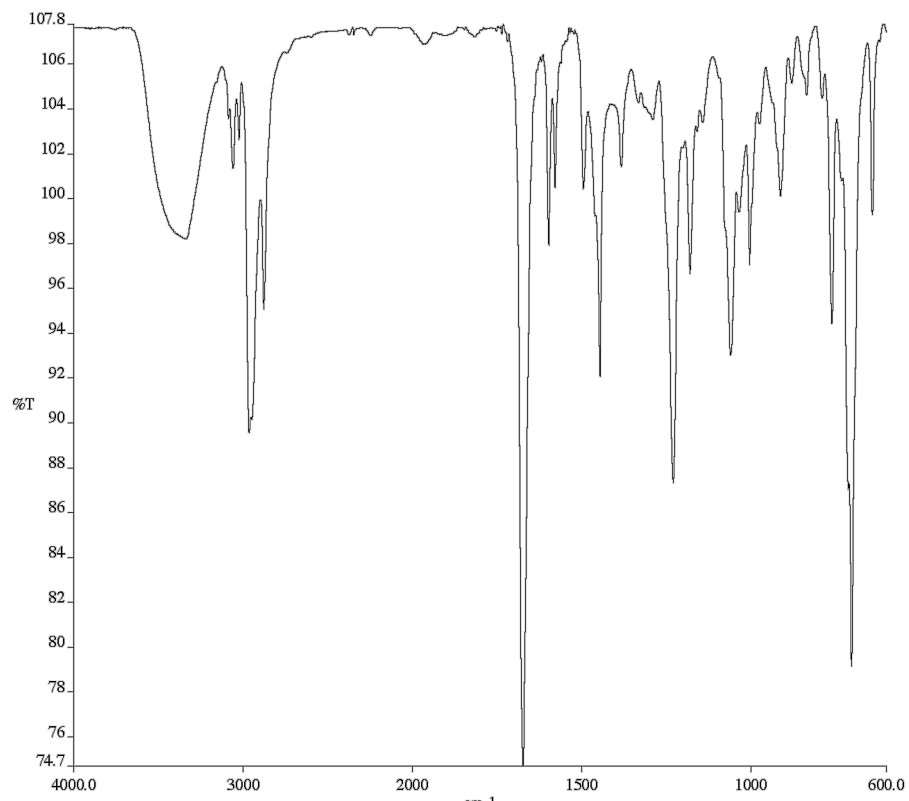

Infrared spectrum (Thin Film, NaCl) of compound 4.

— 2033.92

— 1422.94  
— 1377.25  
— 1331.76  
— 1297.00  
— 1258.09  
— 1217.02— 632.37  
— 58.12— 37.45  
— 26.95

— 8.09

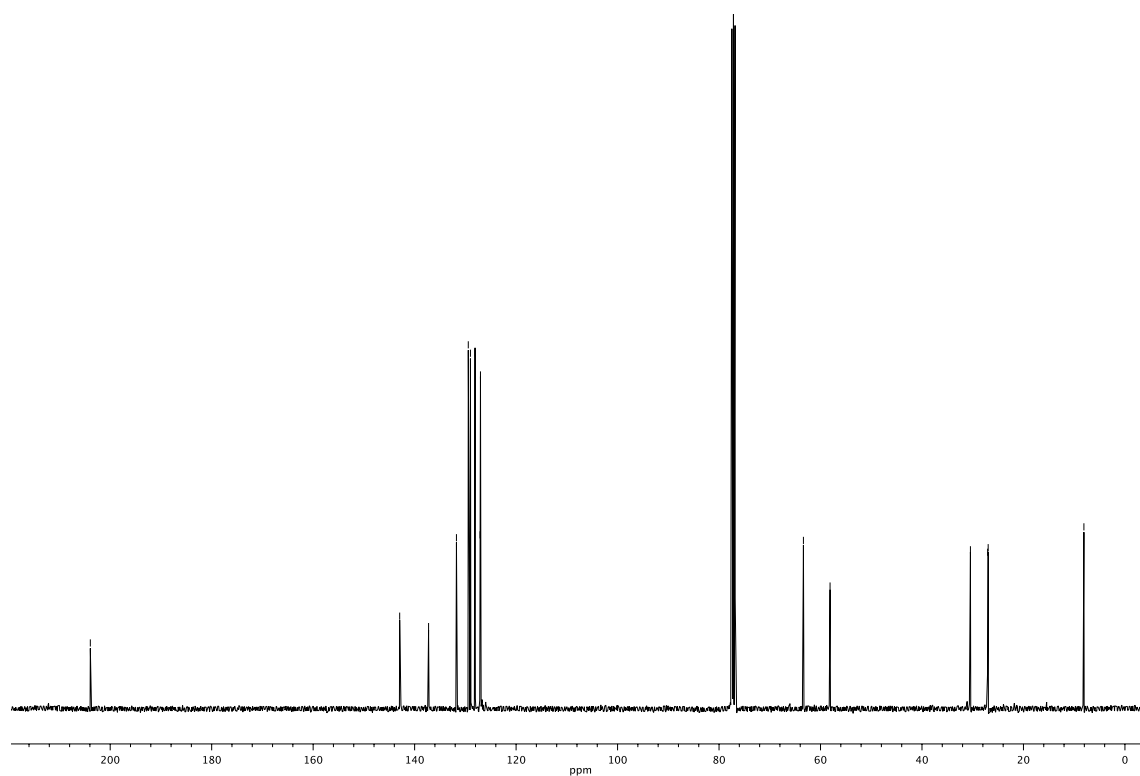<sup>13</sup>C NMR (100 MHz, CDCl<sub>3</sub>) of compound 4.

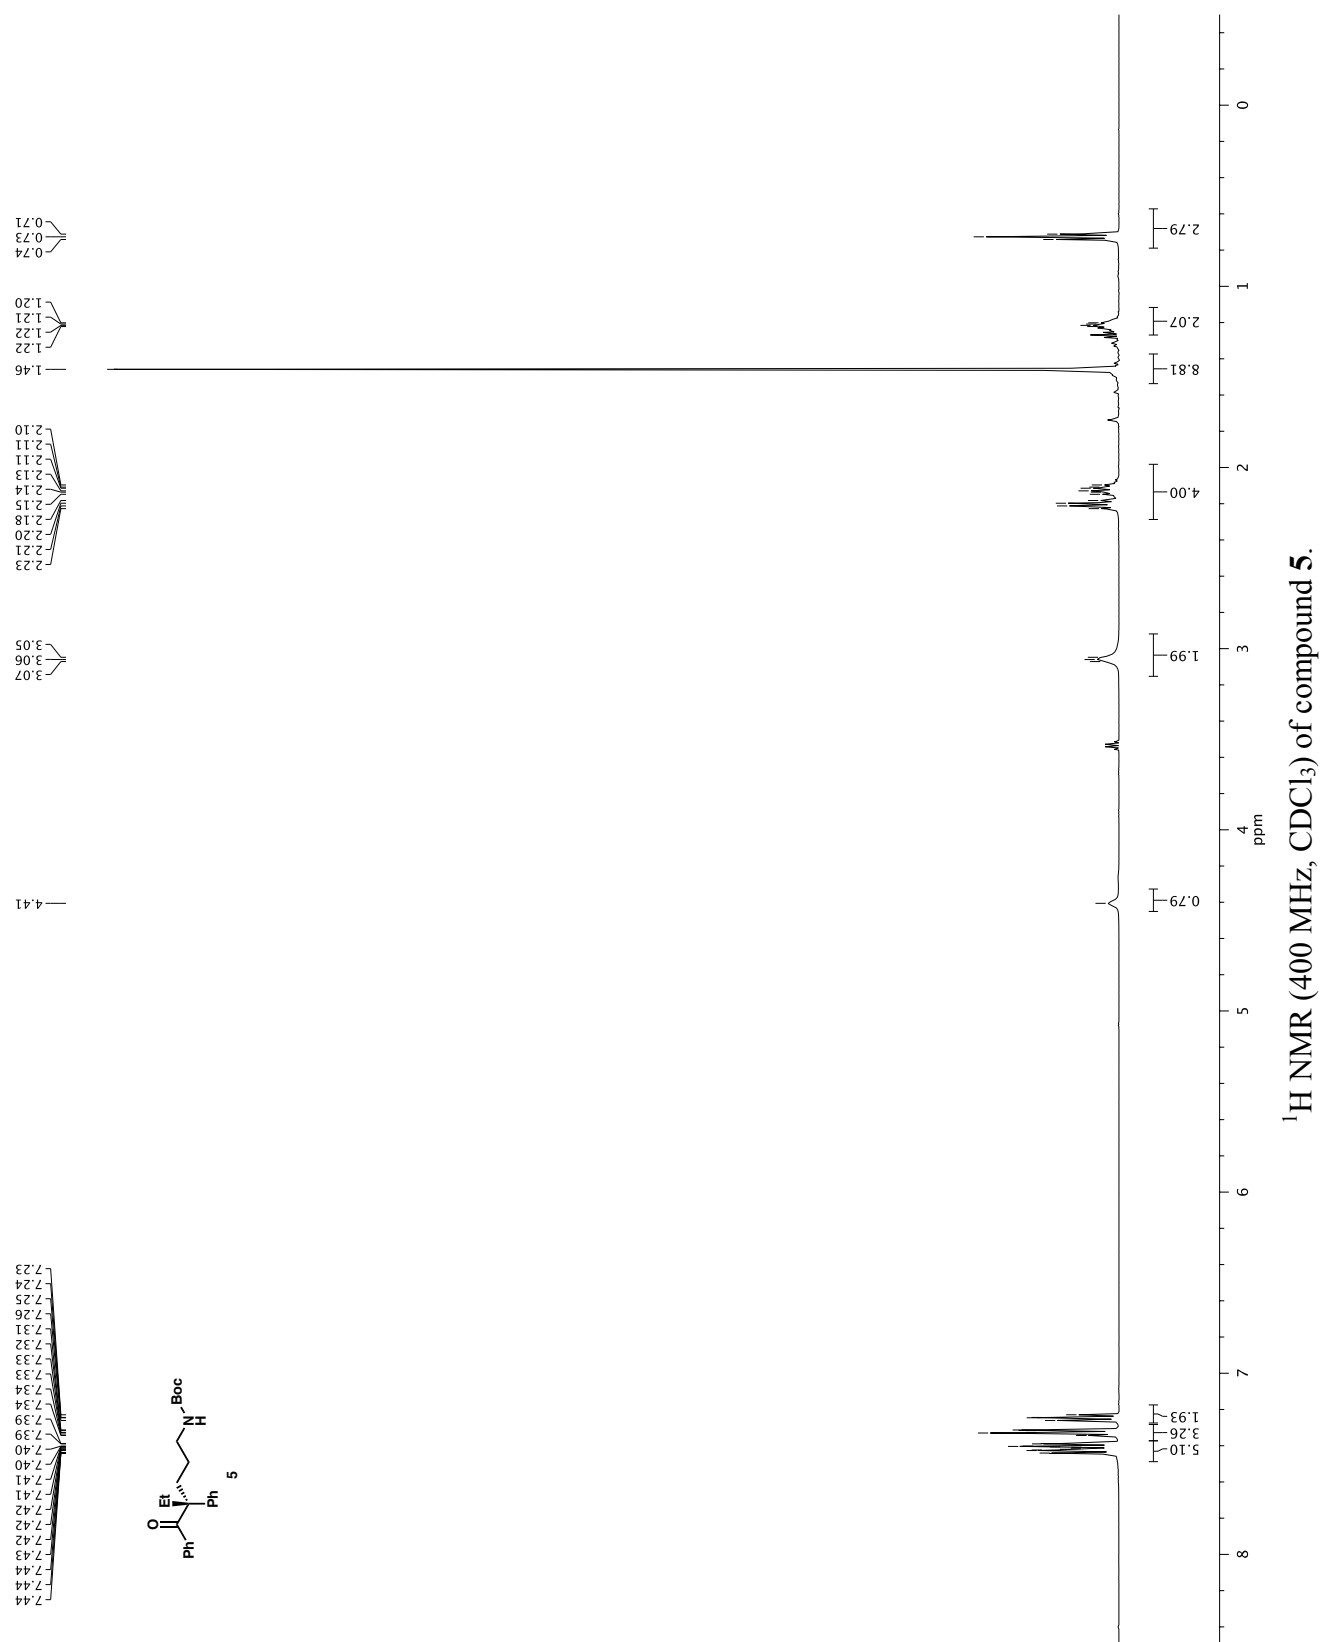

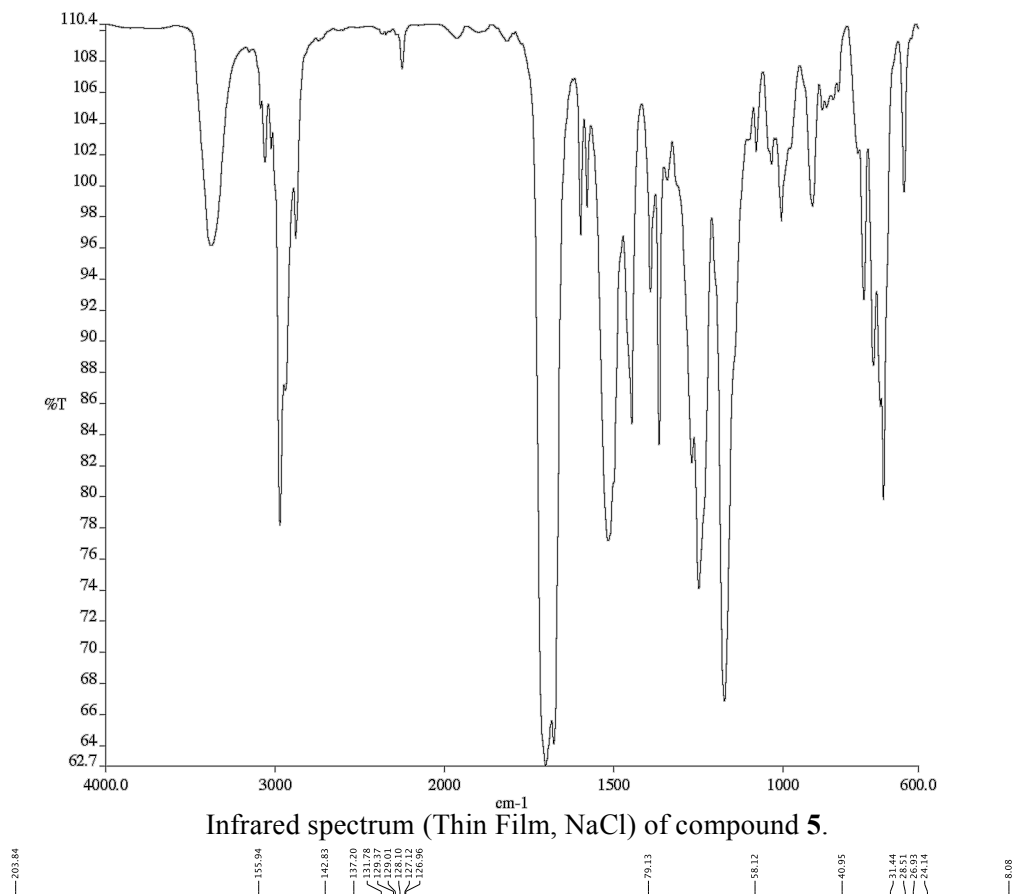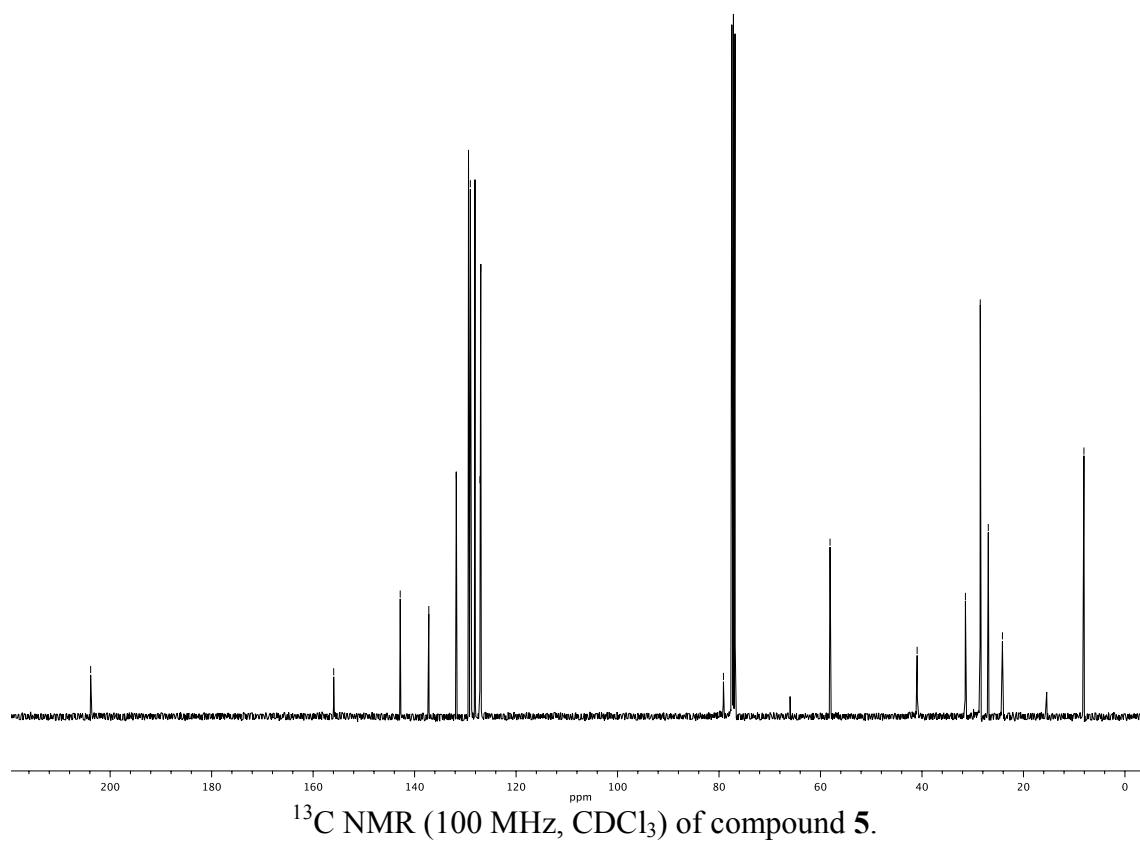



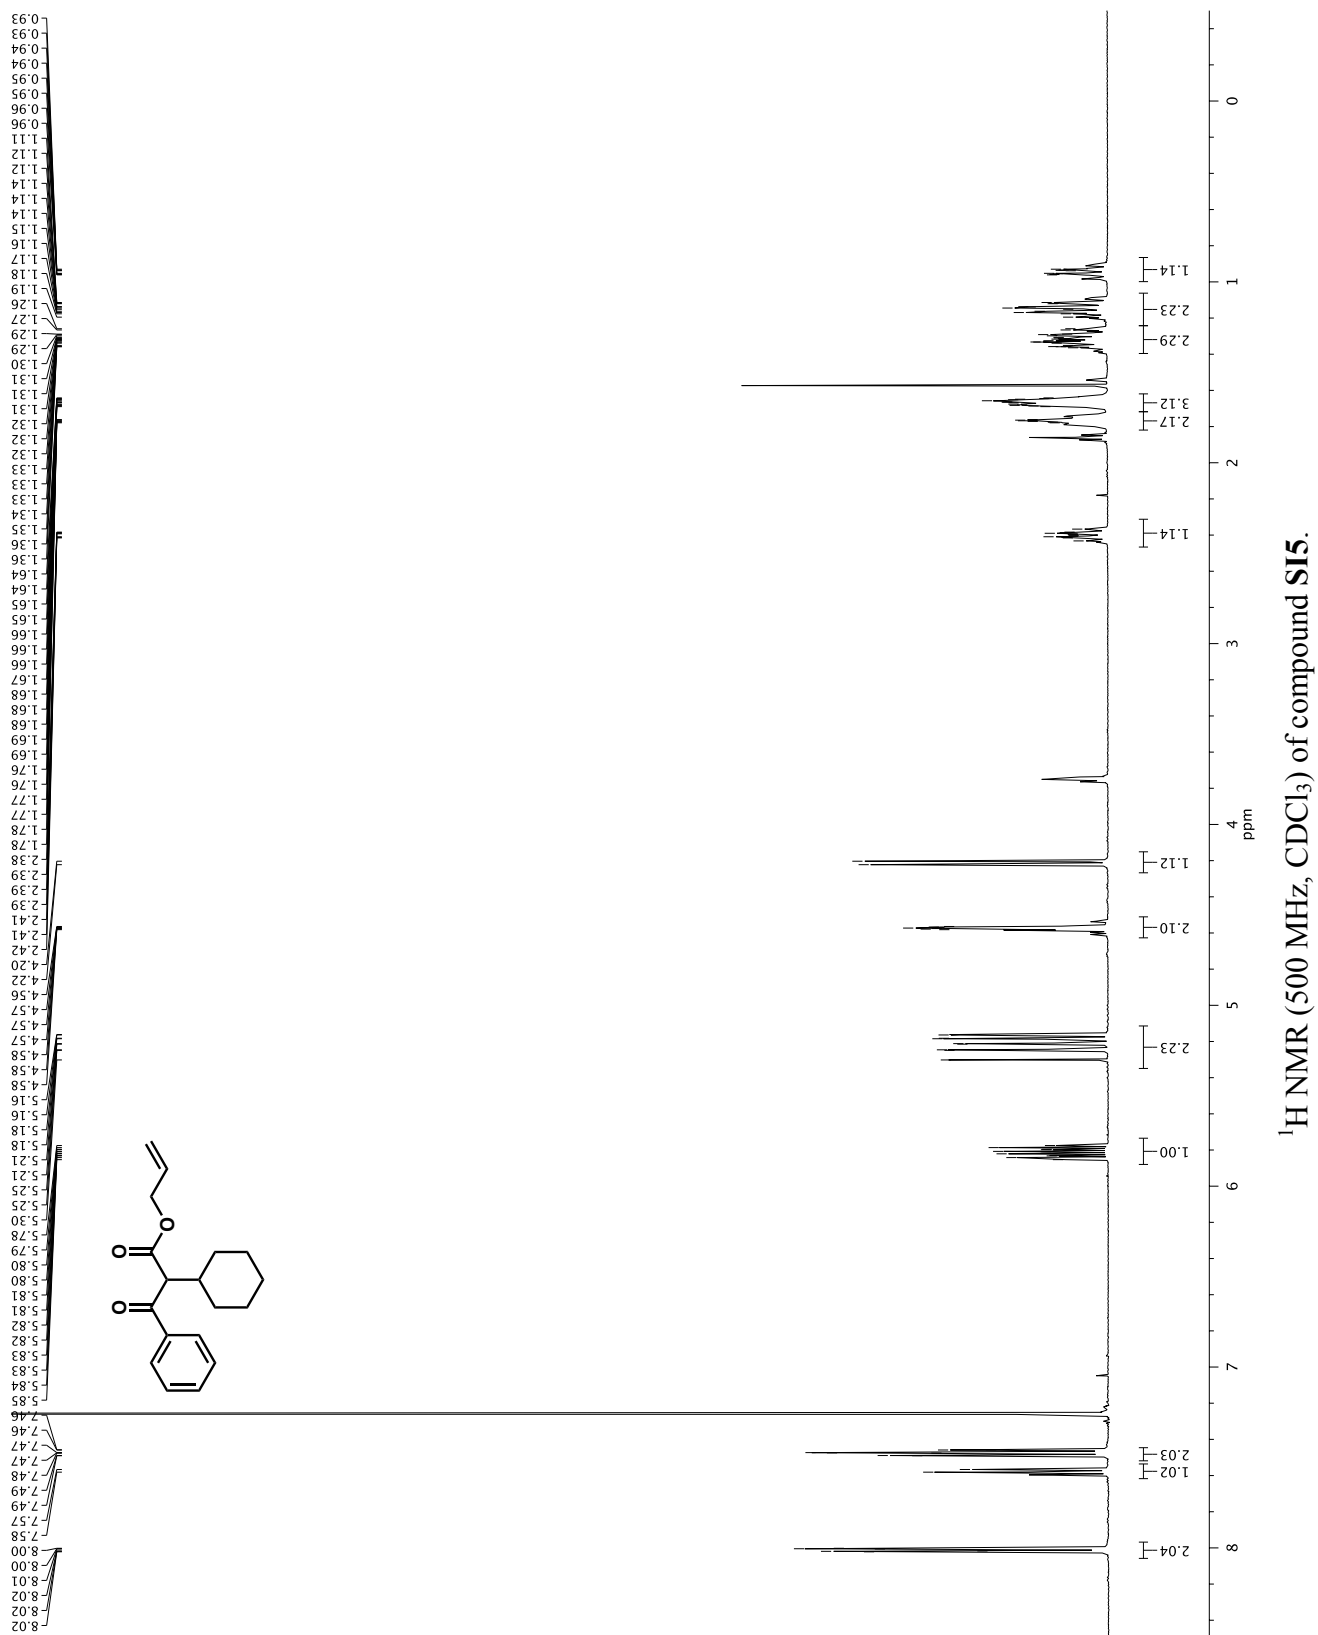

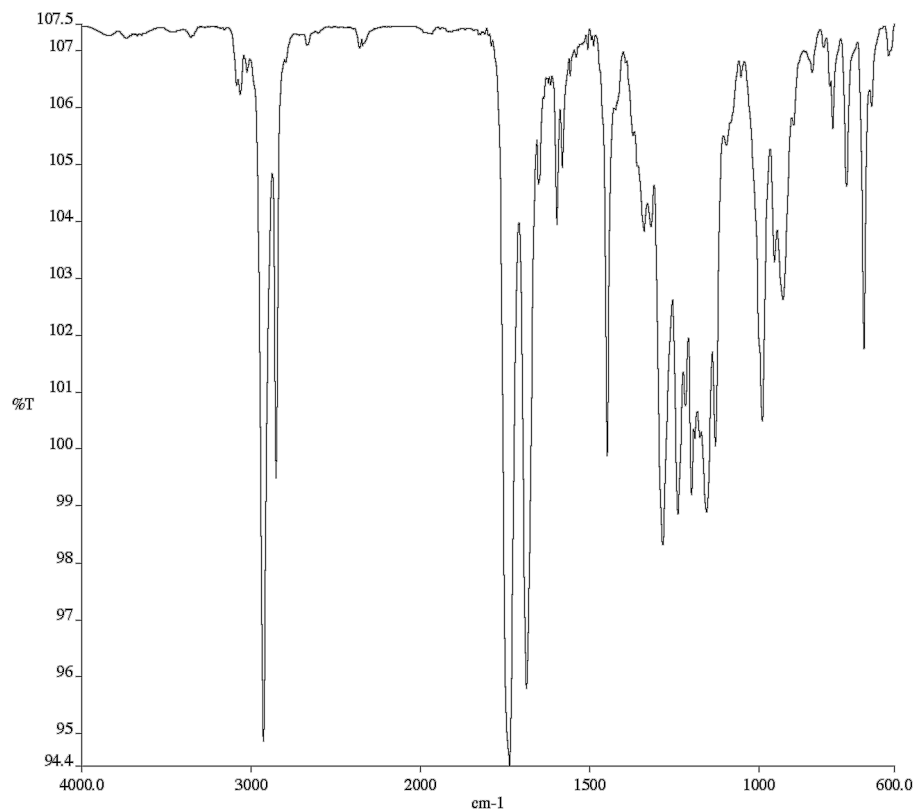Infrared spectrum (Thin Film, NaCl) of compound **SI5**.

— 1947.73  
— 1687.73  
— 1377.09  
— 1353.57  
— 1331.66  
— 1288.63  
— 1186.62  
— 65.78  
— 60.48  
— 38.48  
— 31.15  
— 30.97  
— 26.22  
— 26.04

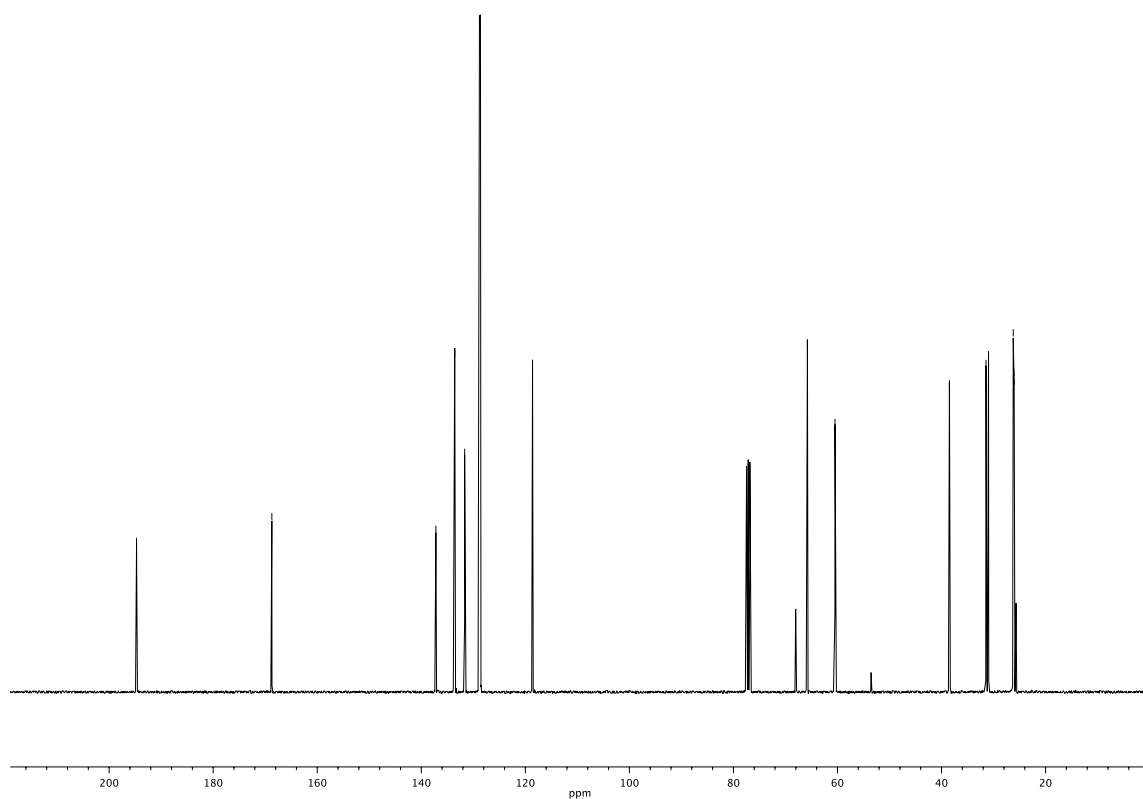<sup>13</sup>C NMR (100 MHz, CDCl<sub>3</sub>) of compound **SI5**.



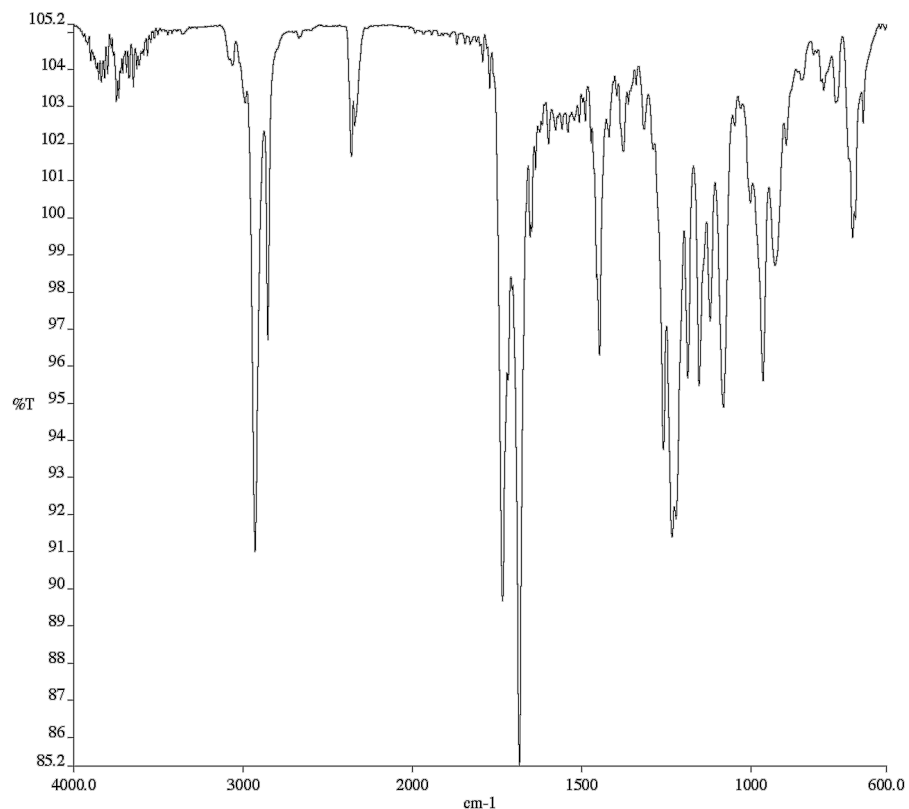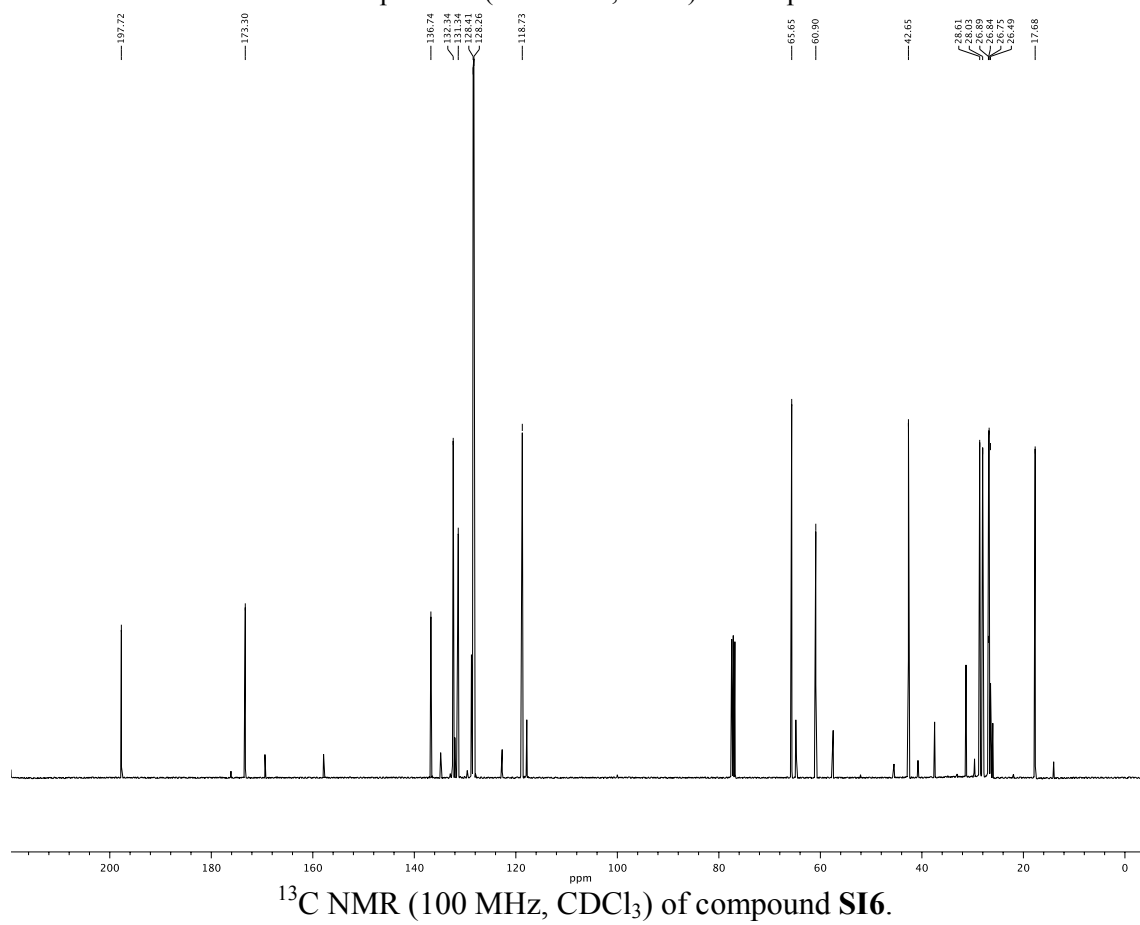

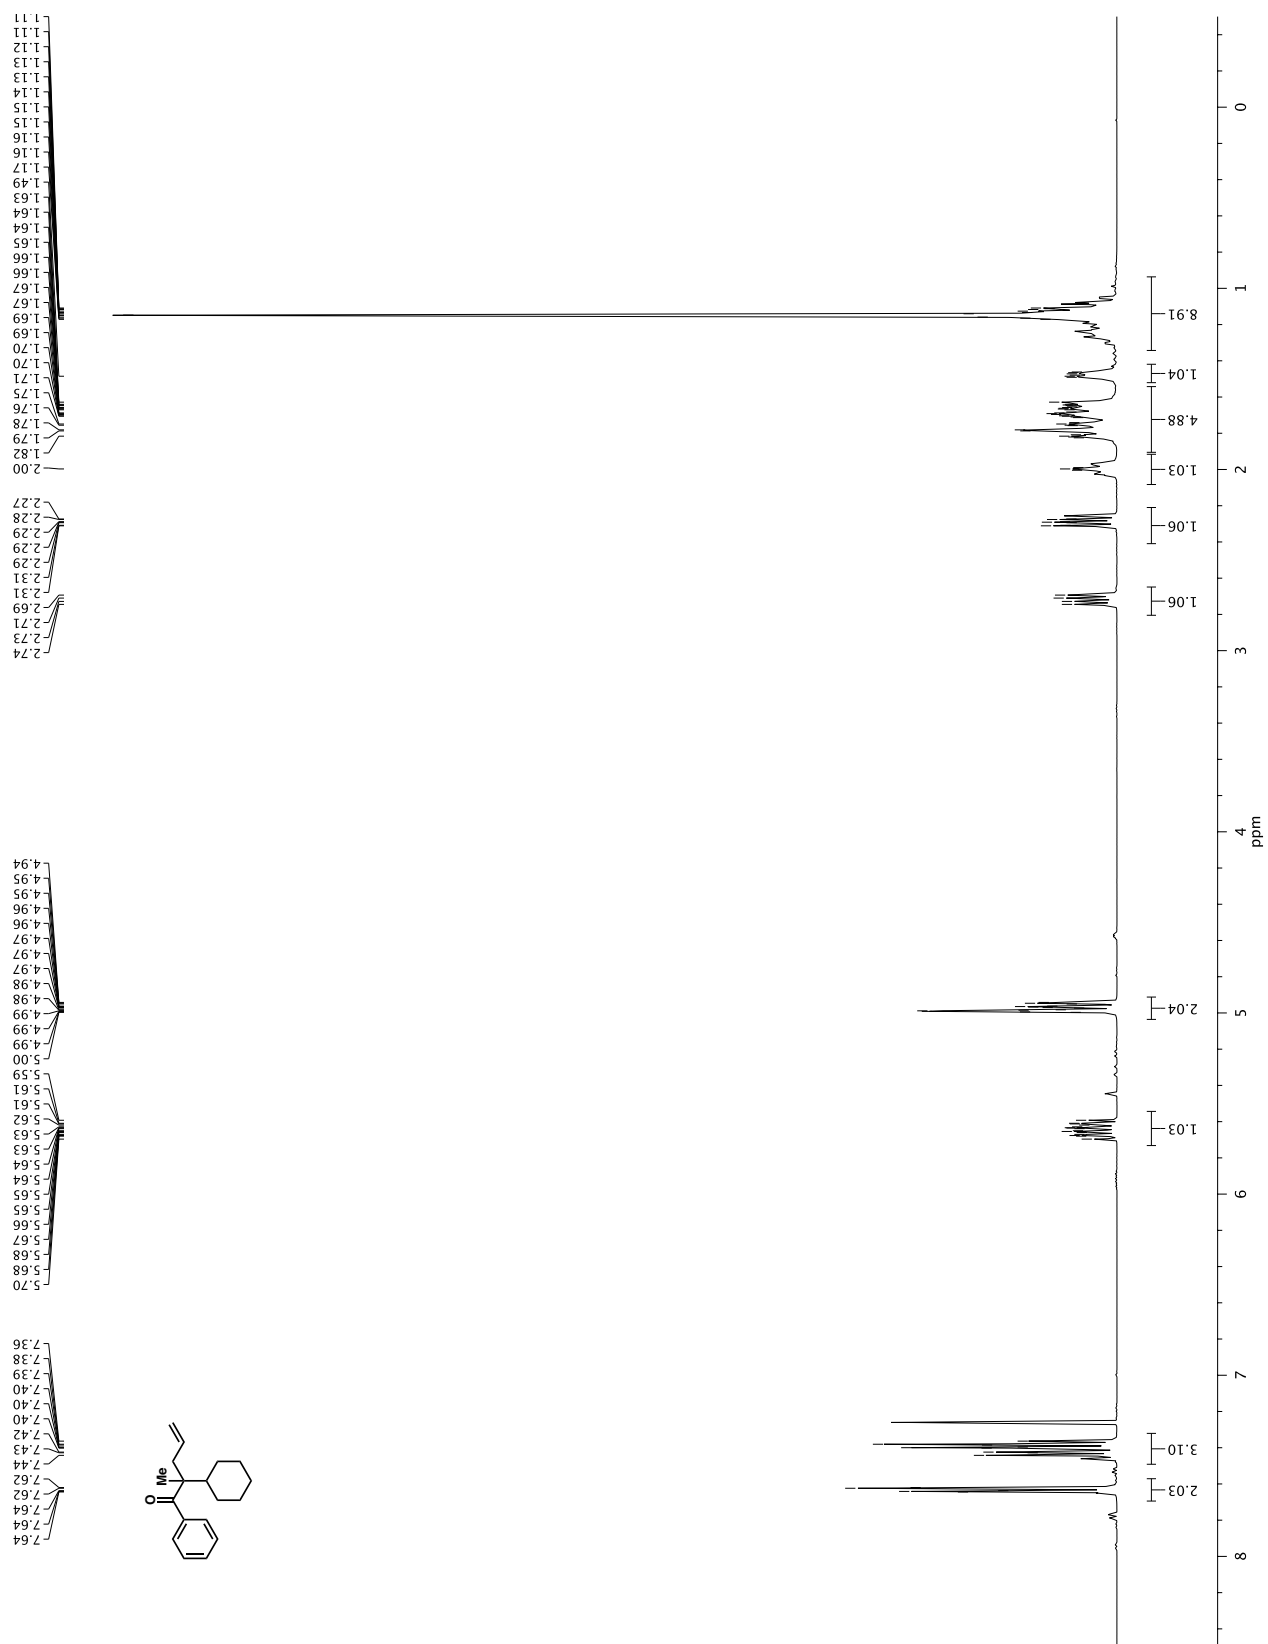

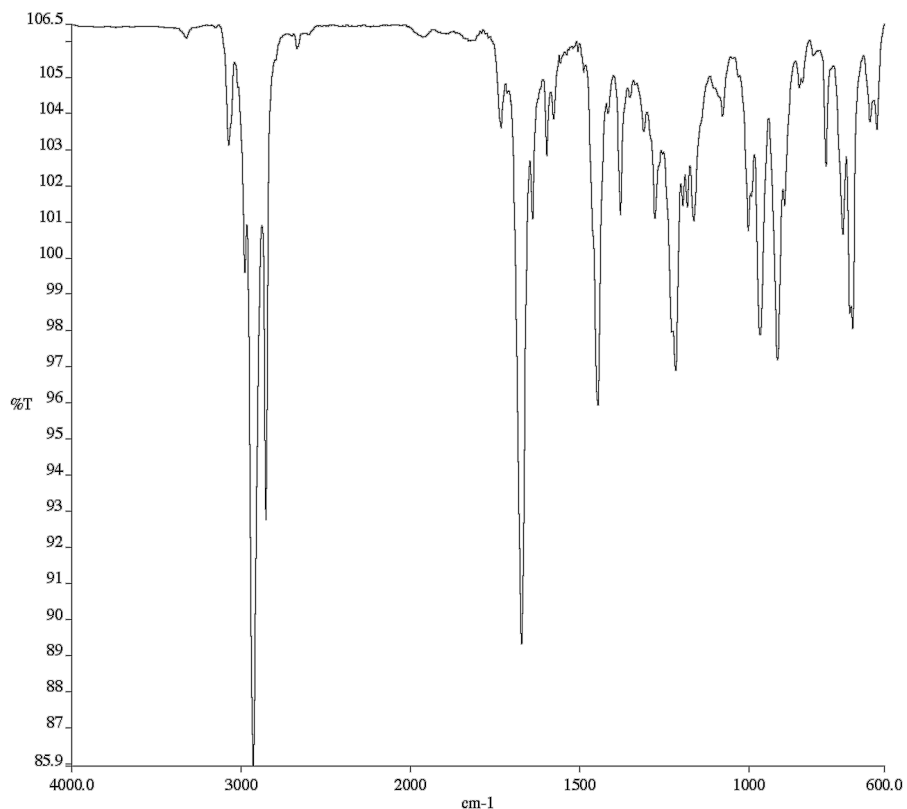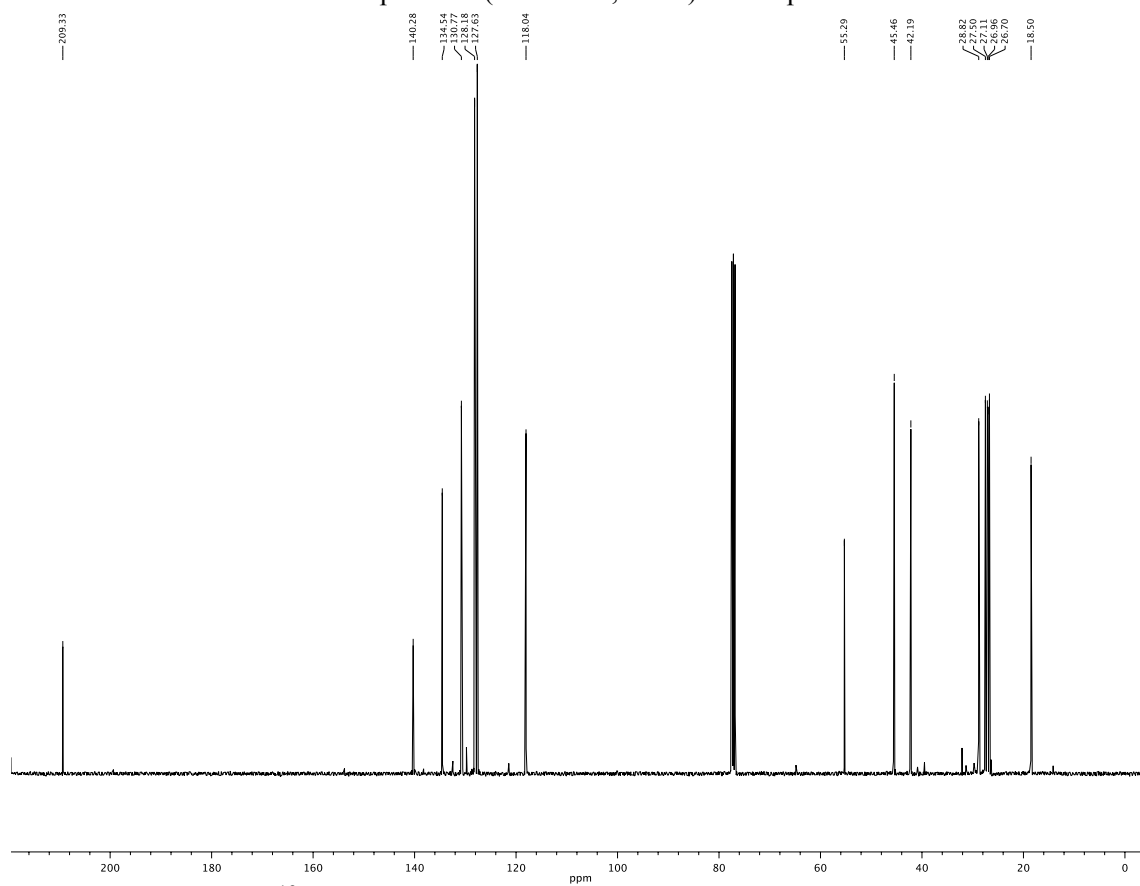 $^{13}\text{C}$  NMR (100 MHz,  $\text{CDCl}_3$ ) of compound **SI7**.
